# Supplementary material for: De novo Sequencing and Comparative Transcriptome Analyses Provide First Insights Into Polysaccharide Biosynthesis During Fruiting Body Development of Lentinula edodes
Source: Front Microbiol. 2021 Jul 13;12:627099. doi: 10.3389/fmicb.2021.627099 (PMC8313990; doi:10.3389/fmicb.2021.627099)
Supplement: Supplementary file 6 [file Table_6.XLSX]

## Sheet: KvsK1
Gene_id	FC(K1/K)	Log2FC(K1/K)	Pvalue	Padjust	Significant	Regulate	Gene description
LE01Gene08280	0.280787	-1.83245	3.33839e-60	3.62549e-56	yes	down	_
LE01Gene11452	10.617	3.40831	8.39256e-59	4.55716e-55	yes	up	_
LE01Gene11430	27.5049	4.78161	3.6628e-53	1.32593e-49	yes	up	RecName: Full=Alcohol dehydrogenase
LE01Gene02548	8.92961	3.1586	1.35814e-51	3.68735e-48	yes	up	_
LE01Gene11866	11.659	3.54337	9.53547e-49	2.0711e-45	yes	up	RecName: Full=Stress protein DDR48; AltName: Full=DNA damage-responsive protein 48; Short=DDRP 48; AltName: Full=Flocculent-specific protein; AltName: Full=YP 75
LE01Gene12658	0.103641	-3.27034	2.03175e-48	3.67746e-45	yes	down	_
LE01Gene01400	0.184493	-2.43836	2.31067e-44	3.58484e-41	yes	down	RecName: Full=Tryptophan 2-halogenase
LE01Gene06113	3.68503	1.88168	4.33295e-44	5.88198e-41	yes	up	RecName: Full=Probable 2-oxoglutarate dehydrogenase E1 component DHKTD1, mitochondrial; AltName: Full=Dehydrogenase E1 and transketolase domain-containing protein
LE01Gene01360	9.831	3.29734	3.00007e-43	3.62009e-40	yes	up	_
LE01Gene00075	5.14771	2.36393	4.61905e-43	5.01629e-40	yes	up	_
LE01Gene03170	8.78648	3.13529	3.5e-42	3.45546e-39	yes	up	RecName: Full=Heat shock protein hsp98; AltName: Full=Protein aggregation-remodeling factor hsp98
LE01Gene02903	3.48671	1.80187	2.26821e-37	2.05273e-34	yes	up	RecName: Full=Hsp70 nucleotide exchange factor FES1 FES1_CRYNJ RecName: Full=Hsp70 nucleotide exchange factor FES1
LE01Gene05461	10.5131	3.39411	7.86162e-36	6.56748e-33	yes	up	RecName: Full=Uncharacterized endoplasmic reticulum membrane protein YGL010W
LE01Gene11416	0.192022	-2.38066	1.27706e-35	9.90633e-33	yes	down	_
LE01Gene05029	0.362692	-1.46318	5.43335e-35	3.93375e-32	yes	down	RecName: Full=Probable chitinase 2; Flags: Precursor
LE01Gene10771	2.62416	1.39186	8.76528e-35	5.94943e-32	yes	up	RecName: Full=ATP-binding cassette sub-family D member 1; AltName: Full=Adrenoleukodystrophy protein; Short=ALDP
LE01Gene01038	18.8005	4.2327	3.69975e-34	2.36349e-31	yes	up	RecName: Full=High-affinity fructose transporter ght6; AltName: Full=Hexose transporter 6; AltName: Full=Meiotic expression up-regulated protein 12
LE01Gene07462	70.9446	6.14862	6.05877e-33	3.65546e-30	yes	up	_
LE01Gene12305	3.0739	1.62007	1.03177e-32	5.89739e-30	yes	up	_
LE01Gene00263	2.4351	1.28398	3.81903e-32	2.07373e-29	yes	up	RecName: Full=Putative acetyl-hydrolase LipR; Flags: Precursor
LE01Gene06540	0.274317	-1.86608	1.1572e-30	5.98435e-28	yes	down	_
LE01Gene07114	10.4939	3.39148	4.50752e-30	2.22508e-27	yes	up	RecName: Full=Glyceraldehyde-3-phosphate dehydrogenase; Short=GAPDH
LE01Gene03256	2.05728	1.04074	5.44873e-30	2.57275e-27	yes	up	RecName: Full=Aspartate--tRNA ligase, cytoplasmic; AltName: Full=Aspartyl-tRNA synthetase; Short=AspRS
LE01Gene11933	2.67718	1.42071	1.87045e-29	8.46381e-27	yes	up	RecName: Full=Phosphatase DCR2; AltName: Full=Dosage-dependent cell cycle regulator 2
LE01Gene05215	2.86828	1.52018	1.06043e-28	4.60649e-26	yes	up	_
LE01Gene09397	4.92996	2.30158	2.15512e-27	9.00178e-25	yes	up	RecName: Full=Pyridoxine/pyridoxamine 5'-phosphate oxidase; AltName: Full=PNP/PMP oxidase; Short=PNPOx; AltName: Full=Pyridoxal 5'-phosphate synthase
LE01Gene12473	6.76212	2.75748	6.10119e-27	2.45403e-24	yes	up	_
LE01Gene03129	7760.65	12.922	7.19157e-27	2.7893e-24	yes	up	_
LE01Gene10343	2.04755	1.0339	5.60743e-26	2.09989e-23	yes	up	_
LE01Gene00900	0.206445	-2.27617	2.77368e-25	1.00407e-22	yes	down	RecName: Full=Multidrug resistance protein fnx1
LE01Gene00536	2.03153	1.02257	6.37607e-25	2.23368e-22	yes	up	RecName: Full=
LE01Gene01708	2.05438	1.0387	2.86696e-24	9.72974e-22	yes	up	RecName: Full=ATP-NADH kinase YEF1
LE01Gene05790	0.0991727	-3.33391	4.91478e-24	1.61741e-21	yes	down	_
LE01Gene05809	0.28911	-1.79031	5.83972e-24	1.86527e-21	yes	down	_
LE01Gene08760	4.73238	2.24257	6.70612e-24	2.08081e-21	yes	up	_
LE01Gene07594	2.04804	1.03424	1.03159e-23	3.11197e-21	yes	up	_
LE01Gene01303	140.633	7.13579	1.63345e-23	4.79441e-21	yes	up	_
LE01Gene12157	3.19171	1.67433	1.99733e-23	5.70816e-21	yes	up	_
LE01Gene12159	6.04951	2.59682	7.74925e-23	2.15787e-20	yes	up	_
LE01Gene12901	0.139809	-2.83847	1.65006e-22	4.47991e-20	yes	down	RecName: Full=Putative transporter C83.11
LE01Gene02541	0.403646	-1.30884	9.33217e-22	2.47189e-19	yes	down	_
LE01Gene01883	16.6066	4.05369	1.35704e-21	3.50892e-19	yes	up	_
LE01Gene03149	0.170273	-2.55408	1.50474e-21	3.80033e-19	yes	down	_
LE01Gene02904	2731.11	11.4153	2.52649e-21	6.23584e-19	yes	up	RecName: Full=Importin subunit alpha-1; AltName: Full=Cell untimely torn protein 15; AltName: Full=Karyopherin subunit alpha-1; AltName: Full=Serine-rich RNA polymer
LE01Gene13380	0.34654	-1.52891	3.45898e-21	8.34767e-19	yes	down	RecName: Full=Cytochrome P450 2U1
LE01Gene06049	4.05139	2.01842	5.95214e-21	1.40054e-18	yes	up	RecName: Full=Probable 2-oxoglutarate-dependent dioxygenase DIN11; AltName: Full=Protein DARK-INDUCIBLE 11
LE01Gene14622	10.7056	3.42029	6.06125e-21	1.40054e-18	yes	up	_
LE01Gene06867	4.70783	2.23506	1.43507e-20	3.24684e-18	yes	up	_
LE01Gene07087	13.8064	3.78727	1.61267e-20	3.5742e-18	yes	up	RecName: Full=Oxygen-dependent choline dehydrogenase; Short=CDH; Short=CHD; AltName: Full=Betaine aldehyde dehydrogenase; Short=BADH
LE01Gene11499	14.0586	3.81338	2.89023e-20	6.27758e-18	yes	up	RecName: Full=Pyruvate decarboxylase
LE01Gene01826	0.21989	-2.18515	3.50725e-20	7.46838e-18	yes	down	_
LE01Gene03053	0.000367659	-11.4093	4.34889e-20	9.08248e-18	yes	down	_
LE01Gene05043	2.22411	1.15323	5.19896e-20	1.0653e-17	yes	up	RecName: Full=Oxygen-dependent coproporphyrinogen-III oxidase; Short=COX; Short=Coprogen oxidase; Short=Coproporphyrinogenase
LE01Gene12135	10.8945	3.44552	8.5746e-20	1.72445e-17	yes	up	_
LE01Gene04740	3.23676	1.69455	9.42764e-20	1.86153e-17	yes	up	RecName: Full=Putative dioxygenase C576.01c
LE01Gene00588	3.48674	1.80188	1.62305e-19	3.14755e-17	yes	up	RecName: Full=Aspartate aminotransferase, cytoplasmic; AltName: Full=Transaminase A
LE01Gene04948	0.208968	-2.25865	1.7946e-19	3.41918e-17	yes	down	_
LE01Gene11007	13.4589	3.75049	2.4604e-19	4.60689e-17	yes	up	_
LE01Gene04147	8.92067	3.15715	2.5216e-19	4.64145e-17	yes	up	_
LE01Gene04870	0.169855	-2.55762	3.57694e-19	6.47427e-17	yes	down	RecName: Full=4-hydroxybenzoate polyprenyltransferase, mitochondrial; Short=4HPT; AltName: Full=4-hydroxybenzoate nonaprenyltransferase; AltName: Full=Polyprenyltra
LE01Gene13151	6.96797	2.80074	4.20205e-19	7.48102e-17	yes	up	_
LE01Gene09687	3.17563	1.66704	5.07819e-19	8.89501e-17	yes	up	_
LE01Gene13626	2.10335	1.07269	5.62953e-19	9.70424e-17	yes	up	_
LE01Gene02161	0.262958	-1.92709	6.40578e-19	1.08698e-16	yes	down	_
LE01Gene04431	2.16043	1.11132	6.97155e-19	1.16479e-16	yes	up	_
LE01Gene09410	3.86273	1.94962	7.23212e-19	1.19001e-16	yes	up	_
LE01Gene13065	5.45727	2.44818	8.55247e-19	1.38627e-16	yes	up	RecName: Full=Hexose transporter HXT10
LE01Gene07461	6.19424	2.63093	9.70017e-19	1.54917e-16	yes	up	RecName: Full=WW domain-containing oxidoreductase
LE01Gene05859	2.18498	1.12762	1.11897e-18	1.76116e-16	yes	up	_
LE01Gene02613	0.306096	-1.70795	1.86585e-18	2.89474e-16	yes	down	_
LE01Gene02390	20.7043	4.37186	2.13028e-18	3.25842e-16	yes	up	RecName: Full=Phosphoglycerate kinase
LE01Gene06641	2.00793	1.00571	4.00651e-18	6.04315e-16	yes	up	RecName: Full=Metal tolerance protein 9; Short=AtMTP9
LE01Gene12017	15.0322	3.90999	5.22886e-18	7.77882e-16	yes	up	RecName: Full=Activin receptor type-1; AltName: Full=Activin receptor type I; Short=ACTR-I; AltName: Full=Activin receptor-like kinase 2; Short=ALK-2; AltName: Full=
LE01Gene04590	1.90964	0.9333	5.6289e-18	8.26079e-16	yes	up	RecName: Full=Transcriptional corepressor LEUNIG
LE01Gene02035	2.04902	1.03494	1.13345e-17	1.64124e-15	yes	up	RecName: Full=Uncharacterized RNA-binding protein C328.05
LE01Gene06647	22.9954	4.52327	1.21146e-17	1.73112e-15	yes	up	_
LE01Gene07331	49.3745	5.6257	1.78844e-17	2.5224e-15	yes	up	RecName: Full=Proline-rich receptor-like protein kinase PERK10; AltName: Full=Proline-rich extensin-like receptor kinase 10; Short=AtPERK10
LE01Gene13248	2.28348	1.19123	2.24654e-17	3.12787e-15	yes	up	RecName: Full=Probable proline dehydrogenase 2; AltName: Full=Kidney and liver proline oxidase 1; AltName: Full=MmPOX1; AltName: Full=Probable proline oxidase 2; A
LE01Gene04418	76.06	6.24907	2.87577e-17	3.95327e-15	yes	up	_
LE01Gene08984	0.422279	-1.24373	3.25583e-17	4.41979e-15	yes	down	_
LE01Gene01273	3.32398	1.73291	3.82846e-17	5.13298e-15	yes	up	RecName: Full=Protein psi1; AltName: Full=Protein psi
LE01Gene13115	2.57336	1.36365	3.87603e-17	5.13338e-15	yes	up	RecName: Full=Hybrid signal transduction histidine kinase B
LE01Gene06111	3.54229	1.82468	6.58786e-17	8.61978e-15	yes	up	RecName: Full=Probable glucose transporter HXT5
LE01Gene04720	8.13148	3.02352	7.76659e-17	1.00411e-14	yes	up	RecName: Full=Enolase; AltName: Full=2-phospho-D-glycerate hydro-lyase; AltName: Full=2-phosphoglycerate dehydratase
LE01Gene08205	0.566623	-0.819539	8.12035e-17	1.03749e-14	yes	down	_
LE01Gene01690	5.1647	2.36868	1.77163e-16	2.23719e-14	yes	up	RecName: Full=CTD nuclear envelope phosphatase 1A; AltName: Full=Serine/threonine-protein phosphatase dullard-A
LE01Gene05360	3.4875	1.80219	2.10841e-16	2.63187e-14	yes	up	RecName: Full=Cytochrome P450 2B10; AltName: Full=CYPIIB10; AltName: Full=CYPIIB20; AltName: Full=Cytochrome P450 2B20; AltName: Full=Cytochrome P450 clone PF3/46; A
LE01Gene06658	0.249144	-2.00495	2.16631e-16	2.65052e-14	yes	down	_
LE01Gene02522	1.78796	0.838312	2.17216e-16	2.65052e-14	yes	up	_
LE01Gene09824	37.9002	5.24413	3.28557e-16	3.92103e-14	yes	up	_
LE01Gene01487	7.67882	2.94088	3.26717e-16	3.92103e-14	yes	up	_
LE01Gene09300	0.434959	-1.20105	3.4752e-16	4.10225e-14	yes	down	RecName: Full=Uncharacterized protein YJR142W
LE01Gene11625	1.77601	0.828636	4.09642e-16	4.78356e-14	yes	up	RecName: Full=Nuclear elongation and deformation protein 1
LE01Gene05016	0.422933	-1.2415	5.40788e-16	6.24783e-14	yes	down	RecName: Full=Psi-producing oxygenase A; AltName: Full=Fatty acid oxygenase ppoA; Includes: RecName: Full=Linoleate 8R-lipoxygenase; Includes: RecName: Full=9,12-o
LE01Gene01628	2.15651	1.1087	6.34744e-16	7.25612e-14	yes	up	_
LE01Gene14072	0.188732	-2.40559	6.66435e-16	7.53904e-14	yes	down	_
LE01Gene09038	0.403558	-1.30915	9.4754e-16	1.06085e-13	yes	down	_
LE01Gene03231	0.487832	-1.03554	1.12e-15	1.24114e-13	yes	down	_
LE01Gene07427	5.96515	2.57656	1.19538e-15	1.3113e-13	yes	up	_
LE01Gene05094	0.263383	-1.92477	2.11446e-15	2.2963e-13	yes	down	_
LE01Gene13411	0.465976	-1.10167	2.49112e-15	2.67857e-13	yes	down	_
LE01Gene09780	0.43174	-1.21177	3.00745e-15	3.20205e-13	yes	down	_
LE01Gene02823	5.18418	2.37412	3.65327e-15	3.8519e-13	yes	up	RecName: Full=Transcription factor SKN7
LE01Gene00643	0.607587	-0.718836	3.82654e-15	3.99579e-13	yes	down	RecName: Full=DNA mismatch repair protein msh3; AltName: Full=MutS protein homolog 3
LE01Gene04723	7.64688	2.93487	3.89523e-15	4.02878e-13	yes	up	_
LE01Gene05599	2.02974	1.02129	4.17897e-15	4.28148e-13	yes	up	_
LE01Gene08472	0.521613	-0.938948	4.23936e-15	4.30275e-13	yes	down	_
LE01Gene08762	7.16782	2.84153	4.61434e-15	4.63998e-13	yes	up	_
LE01Gene04897	0.000892632	-10.1296	4.92629e-15	4.90821e-13	yes	down	_
LE01Gene01317	0.164885	-2.60047	6.07898e-15	6.00161e-13	yes	down	RecName: Full=Cytochrome P450 2U1
LE01Gene05364	1.8962	0.923114	1.02448e-14	1.00232e-12	yes	up	RecName: Full=Acetyl-CoA carboxylase; Short=ACC; AltName: Full=Cell untimely torn protein 6; Includes: RecName: Full=Biotin carboxylase
LE01Gene01992	0.26308	-1.92643	1.16131e-14	1.12606e-12	yes	down	RecName: Full=Carbamoyl-phosphate synthase arginine-specific small chain; Short=CPS-A; AltName: Full=Arginine-specific carbamoyl-phosphate synthetase, glutamine ch
LE01Gene08692	0.181404	-2.46272	1.29041e-14	1.24016e-12	yes	down	RecName: Full=Probable metabolite transport protein CsbC
LE01Gene10511	3.8388	1.94066	1.35728e-14	1.29299e-12	yes	up	_
LE01Gene13255	6.55858	2.71338	1.50059e-14	1.41708e-12	yes	up	_
LE01Gene05674	1.95788	0.969291	1.63514e-14	1.53083e-12	yes	up	_
LE01Gene05141	1.93367	0.951341	1.77842e-14	1.65074e-12	yes	up	_
LE01Gene12329	0.455565	-1.13427	2.06438e-14	1.89993e-12	yes	down	RecName: Full=60S ribosome subunit biogenesis protein nip7
LE01Gene04460	0.520263	-0.942686	2.78273e-14	2.53953e-12	yes	down	RecName: Full=N-alpha-acetyltransferase 20; AltName: Full=Methionine N-acetyltransferase; AltName: Full=N-acetyltransferase 5; AltName: Full=N-terminal acetyltrans
LE01Gene13551	15.0715	3.91375	3.04958e-14	2.75987e-12	yes	up	RecName: Full=Fruiting body protein SC3; AltName: Full=Hydrophobin SC3; Flags: Precursor
LE01Gene08983	0.165141	-2.59823	4.35902e-14	3.91231e-12	yes	down	_
LE01Gene02112	1.91569	0.937867	7.38803e-14	6.57656e-12	yes	up	RecName: Full=Glutaryl-CoA dehydrogenase, mitochondrial; Short=GCD; Flags: Precursor
LE01Gene12160	4.289	2.10064	7.7167e-14	6.75971e-12	yes	up	RecName: Full=Receptor homology region, transmembrane domain- and RING domain-containing protein 4; Short=AtRMR4; Flags: Precursor
LE01Gene05001	3.91911	1.97052	7.71827e-14	6.75971e-12	yes	up	_
LE01Gene00850	0.419058	-1.25478	8.75715e-14	7.60821e-12	yes	down	_
LE01Gene12947	1.92602	0.945626	1.04476e-13	9.00487e-12	yes	up	_
LE01Gene12391	2.43946	1.28656	1.25062e-13	1.06943e-11	yes	up	RecName: Full=Probable proline dehydrogenase 2; AltName: Full=Kidney and liver proline oxidase 1; AltName: Full=MmPOX1; AltName: Full=Probable proline oxidase 2; A
LE01Gene13226	4.41504	2.14243	1.31012e-13	1.11155e-11	yes	up	RecName: Full=Glucose oxidase; AltName: Full=Beta-D-glucose:oxygen 1-oxido-reductase; AltName: Full=Glucose oxyhydrase; Short=GOD; Flags: Precursor
LE01Gene12143	2.28168	1.1901	1.49642e-13	1.25977e-11	yes	up	RecName: Full=Probable pre-mRNA-splicing factor ATP-dependent RNA helicase prp43
LE01Gene11279	5.90074	2.5609	3.67011e-13	3.06595e-11	yes	up	_
LE01Gene06587	1.7893	0.839392	3.97868e-13	3.29835e-11	yes	up	RecName: Full=Arginase
LE01Gene01132	5.51516	2.4634	4.08386e-13	3.3599e-11	yes	up	_
LE01Gene13419	0.456664	-1.13079	4.42003e-13	3.60914e-11	yes	down	RecName: Full=O-methylsterigmatocystin oxidoreductase; Short=OMST oxidoreductase; AltName: Full=Aflatoxin B synthase; AltName: Full=Aflatoxin biosynthesis protein
LE01Gene08746	0.155863	-2.68165	5.39566e-13	4.3729e-11	yes	down	_
LE01Gene02679	2.39094	1.25758	5.65391e-13	4.51482e-11	yes	up	_
LE01Gene08156	0.476021	-1.0709	5.95688e-13	4.72202e-11	yes	down	_
LE01Gene08981	0.350431	-1.5128	6.10855e-13	4.80717e-11	yes	down	_
LE01Gene14464	2.29506	1.19853	6.26392e-13	4.89397e-11	yes	up	_
LE01Gene01002	0.4209	-1.24845	6.52481e-13	5.06139e-11	yes	down	RecName: Full=ABC1 family protein C10F6.14c
LE01Gene04081	6.81389	2.76848	7.40359e-13	5.70234e-11	yes	up	RecName: Full=Lipase 5; Flags: Precursor
LE01Gene09772	0.298963	-1.74196	7.68599e-13	5.87816e-11	yes	down	_
LE01Gene02369	1.85233	0.889342	1.049e-12	7.96654e-11	yes	up	RecName: Full=Mitogen-activated protein kinase kinase kinase kinase 1; AltName: Full=Hematopoietic progenitor kinase; AltName: Full=MAPK/ERK kinase kinase kinase 1;
LE01Gene06808	0.124418	-3.00673	1.09272e-12	8.2409e-11	yes	down	_
LE01Gene05389	0.358182	-1.48123	1.22249e-12	9.15601e-11	yes	down	_
LE01Gene03315	2.23367	1.15942	1.56124e-12	1.15341e-10	yes	up	RecName: Full=Short/branched chain specific acyl-CoA dehydrogenase, mitochondrial; Short=SBCAD; AltName: Full=2-methyl branched chain acyl-CoA dehydrogenase; Short
LE01Gene13812	9.10058	3.18596	1.55809e-12	1.15341e-10	yes	up	_
LE01Gene09228	2.10108	1.07113	1.81612e-12	1.33264e-10	yes	up	_
LE01Gene02093	5.41668	2.43741	1.83267e-12	1.33576e-10	yes	up	RecName: Full=NADP-dependent malic enzyme; Short=NADP-ME; AltName: Full=SrfA-induced gene A protein
LE01Gene07441	0.361331	-1.46861	1.86818e-12	1.35256e-10	yes	down	RecName: Full=Probable transporter MCH4
LE01Gene02211	0.445117	-1.16774	2.03257e-12	1.46183e-10	yes	down	RecName: Full=Probable phosphomevalonate kinase
LE01Gene09340	3.42689	1.7769	2.14838e-12	1.53496e-10	yes	up	_
LE01Gene02371	16.8444	4.0742	2.17218e-12	1.54182e-10	yes	up	_
LE01Gene11699	0.363132	-1.46143	2.38657e-12	1.683e-10	yes	down	_
LE01Gene03499	3.28718	1.71685	2.84878e-12	1.99599e-10	yes	up	_
LE01Gene02109	0.562035	-0.831267	2.86809e-12	1.99663e-10	yes	down	RecName: Full=Uncharacterized transporter C1002.16c
LE01Gene11712	11.1271	3.476	2.89862e-12	2.00503e-10	yes	up	_
LE01Gene04824	0.568396	-0.815031	2.98875e-12	2.05429e-10	yes	down	_
LE01Gene05597	4.62196	2.2085	3.41875e-12	2.33507e-10	yes	up	RecName: Full=Tetrahydrocannabinolic acid synthase; Short=THCAS; AltName: Full=Delta(1)-tetrahydrocannabinolic acid synthase; AltName: Full=THCA synthase; Flags: P
LE01Gene02765	1.52747	0.611146	3.63152e-12	2.46489e-10	yes	up	_
LE01Gene10187	4.99467	2.32039	3.78293e-12	2.55172e-10	yes	up	_
LE01Gene07906	0.346667	-1.52838	4.10069e-12	2.74898e-10	yes	down	_
LE01Gene01154	3.4264	1.77669	5.06637e-12	3.37551e-10	yes	up	_
LE01Gene08152	1.8003	0.848239	5.78857e-12	3.83316e-10	yes	up	_
LE01Gene08623	0.48047	-1.05748	6.18263e-12	4.0693e-10	yes	down	_
LE01Gene05227	0.193499	-2.3696	6.23943e-12	4.08194e-10	yes	down	RecName: Full=GDP-mannose transporter; Short=GMT
LE01Gene02764	6.20986	2.63456	6.30193e-12	4.09814e-10	yes	up	_
LE01Gene04325	0.307304	-1.70226	6.6922e-12	4.32603e-10	yes	down	RecName: Full=Molybdenum cofactor sulfurase; Short=MCS; Short=MOS; Short=MoCo sulfurase; AltName: Full=Abscisic acid protein 3; AltName: Full=Low expression of osm
LE01Gene07152	0.649962	-0.621573	7.22463e-12	4.64257e-10	yes	down	_
LE01Gene09825	9.11341	3.18799	7.33314e-12	4.68458e-10	yes	up	RecName: Full=Uncharacterized aromatic compound monooxygenase YhjG
LE01Gene08353	1.77746	0.829814	7.49676e-12	4.7611e-10	yes	up	_
LE01Gene01982	2.64453	1.40301	7.56788e-12	4.77832e-10	yes	up	RecName: Full=Homeobox protein HD-10; AltName: Full=EcHD-10
LE01Gene11434	6.92501	2.79182	7.65508e-12	4.80544e-10	yes	up	RecName: Full=Isocitrate lyase; Short=ICL; Short=Isocitrase; Short=Isocitratase
LE01Gene05198	16.3039	4.02714	8.06881e-12	5.03605e-10	yes	up	_
LE01Gene07680	3.64841	1.86727	8.93572e-12	5.54525e-10	yes	up	RecName: Full=Prolyl 3,4-dihydroxylase TPA1; AltName: Full=Termination and polyadenylation protein 1
LE01Gene02729	4.69265	2.2304	9.85077e-12	6.07837e-10	yes	up	_
LE01Gene03175	4.55881	2.18866	1.18044e-11	7.24268e-10	yes	up	_
LE01Gene09406	3.38628	1.7597	1.19704e-11	7.3033e-10	yes	up	_
LE01Gene01380	0.415795	-1.26606	1.22793e-11	7.4499e-10	yes	down	RecName: Full=Uncharacterized protein YEL023C
LE01Gene01129	0.396483	-1.33467	1.27009e-11	7.66286e-10	yes	down	_
LE01Gene07638	1.78454	0.83555	1.32744e-11	7.96463e-10	yes	up	RecName: Full=Protein AF-9 homolog
LE01Gene11444	0.44572	-1.16579	1.364e-11	8.13902e-10	yes	down	RecName: Full=V-type proton ATPase 16 kDa proteolipid subunit 2; Short=V-ATPase 16 kDa proteolipid subunit 2; AltName: Full=Proteolipid protein VMA11; AltName: Ful
LE01Gene09663	1.87028	0.903256	1.38964e-11	8.24673e-10	yes	up	RecName: Full=2-oxoisovalerate dehydrogenase subunit alpha, mitochondrial; AltName: Full=Branched-chain alpha-keto acid dehydrogenase E1 component alpha chain; Shor
LE01Gene11435	2.56762	1.36043	1.41464e-11	8.34945e-10	yes	up	RecName: Full=UDP-N-acetylglucosamine--dolichyl-phosphate N-acetylglucosaminephosphotransferase; AltName: Full=GlcNAc-1-P transferase; Short=G1PT; Short=GPT; AltName
LE01Gene11809	2.28944	1.19499	1.5364e-11	9.01909e-10	yes	up	RecName: Full=Protein transport protein sec1
LE01Gene09373	1.99568	0.996878	1.82423e-11	1.06512e-09	yes	up	RecName: Full=Multistep phosphorelay regulator 1
LE01Gene01486	2.02325	1.01668	1.84214e-11	1.06982e-09	yes	up	_
LE01Gene02284	2.10484	1.07371	1.96085e-11	1.1327e-09	yes	up	RecName: Full=Uncharacterized metal transporter C1020.03
LE01Gene02352	0.442242	-1.17709	2.20674e-11	1.268e-09	yes	down	_
LE01Gene02958	4.32751	2.11354	2.2555e-11	1.2892e-09	yes	up	RecName: Full=Protein kinase C theta type; AltName: Full=nPKC-theta
LE01Gene09153	0.371734	-1.42766	2.38551e-11	1.35637e-09	yes	down	_
LE01Gene07424	11.2635	3.49359	2.42409e-11	1.36402e-09	yes	up	_
LE01Gene07265	4.45885	2.15667	2.41405e-11	1.36402e-09	yes	up	_
LE01Gene12404	2.84885	1.51038	2.58191e-11	1.44534e-09	yes	up	_
LE01Gene13705	3.57909	1.83959	3.00389e-11	1.67294e-09	yes	up	_
LE01Gene02518	2.28673	1.19329	3.12843e-11	1.73341e-09	yes	up	RecName: Full=Heat shock protein HSS1
LE01Gene09539	0.539306	-0.890825	3.1866e-11	1.75668e-09	yes	down	_
LE01Gene02106	0.516203	-0.953989	3.47265e-11	1.90469e-09	yes	down	_
LE01Gene00881	0.328782	-1.6048	3.50575e-11	1.91319e-09	yes	down	RecName: Full=RNA 3'-terminal phosphate cyclase-like protein
LE01Gene04252	0.55784	-0.842078	3.581e-11	1.94448e-09	yes	down	_
LE01Gene08861	0.464851	-1.10516	3.87964e-11	2.09616e-09	yes	down	_
LE01Gene10189	2.03084	1.02208	4.05019e-11	2.17748e-09	yes	up	_
LE01Gene08202	1.84788	0.885871	4.34393e-11	2.31255e-09	yes	up	_
LE01Gene10083	5.10454	2.35178	4.34401e-11	2.31255e-09	yes	up	RecName: Full=ATP-dependent 6-phosphofructokinase; Short=ATP-PFK; Short=Phosphofructokinase; AltName: Full=Phosphohexokinase
LE01Gene14371	0.183317	-2.44759	4.728e-11	2.50469e-09	yes	down	_
LE01Gene12147	2.21859	1.14965	5.06983e-11	2.67274e-09	yes	up	_
LE01Gene03603	1.96049	0.971212	5.13006e-11	2.69142e-09	yes	up	_
LE01Gene00321	0.629625	-0.667435	5.27224e-11	2.75272e-09	yes	down	RecName: Full=Peptide-N(4)-(N-acetyl-beta-glucosaminyl)asparagine amidase; AltName: Full=Peptide:N-glycanase; Short=PNGase
LE01Gene12461	1.71993	0.782348	5.34823e-11	2.7542e-09	yes	up	_
LE01Gene04151	0.552091	-0.857022	5.3305e-11	2.7542e-09	yes	down	_
LE01Gene05359	3.21113	1.68308	5.35116e-11	2.7542e-09	yes	up	_
LE01Gene06037	0.37633	-1.40993	5.41892e-11	2.77592e-09	yes	down	_
LE01Gene06650	0.404648	-1.30526	5.44934e-11	2.7784e-09	yes	down	RecName: Full=DnaJ homolog subfamily B member 8; AltName: Full=mDj6
LE01Gene14598	0.48969	-1.03006	5.84229e-11	2.96483e-09	yes	down	RecName: Full=Protein transport protein SEC13
LE01Gene11775	11.6237	3.539	5.9226e-11	2.9916e-09	yes	up	RecName: Full=D-arabinitol dehydrogenase 1; AltName: Full=NADP-dependent D-arabitol dehydrogenase
LE01Gene00241	2.04761	1.03394	6.07929e-11	3.05653e-09	yes	up	_
LE01Gene12447	0.580906	-0.783624	6.92532e-11	3.46585e-09	yes	down	RecName: Full=Multiprotein-bridging factor 1
LE01Gene12260	0.349973	-1.51469	7.26424e-11	3.61879e-09	yes	down	_
LE01Gene03046	0.580775	-0.783948	8.40293e-11	4.16693e-09	yes	down	_
LE01Gene11993	2.03084	1.02208	9.93716e-11	4.90534e-09	yes	up	RecName: Full=Probable saccharopine dehydrogenase
LE01Gene05322	2.51221	1.32896	1.00832e-10	4.95491e-09	yes	up	_
LE01Gene07203	3.47859	1.7985	1.02267e-10	5.00281e-09	yes	up	RecName: Full=Heat shock protein 16; AltName: Full=16 kDa heat shock protein
LE01Gene08007	4.50457	2.17139	1.02844e-10	5.00846e-09	yes	up	_
LE01Gene12264	3.13931	1.65045	1.04721e-10	5.07708e-09	yes	up	RecName: Full=Putative NADPH dehydrogenase C23G7.10c; AltName: Full=Old yellow enzyme homolog 3
LE01Gene02825	0.373525	-1.42072	1.10557e-10	5.33624e-09	yes	down	_
LE01Gene11578	1.62563	0.700996	1.12286e-10	5.3957e-09	yes	up	_
LE01Gene05092	0.379371	-1.39832	1.1441e-10	5.47353e-09	yes	down	_
LE01Gene02359	0.495864	-1.01198	1.1886e-10	5.6615e-09	yes	down	_
LE01Gene09152	0.253221	-1.98153	1.26787e-10	6.01271e-09	yes	down	_
LE01Gene02491	1.8933	0.920901	1.58535e-10	7.48559e-09	yes	up	_
LE01Gene08744	1.69241	0.759077	1.65475e-10	7.77946e-09	yes	up	RecName: Full=Endo-beta-1,4-glucanase D; Short=Endoglucanase D; AltName: Full=Carboxymethylcellulase D; AltName: Full=Cellulase D; Flags: Precursor
LE01Gene12207	1.82806	0.870312	1.6976e-10	7.94652e-09	yes	up	_
LE01Gene01450	0.443767	-1.17213	1.72716e-10	8.05019e-09	yes	down	_
LE01Gene10294	0.636176	-0.652503	1.90514e-10	8.84183e-09	yes	down	RecName: Full=Eukaryotic translation initiation factor 1A, X-chromosomal; Short=eIF-1A X isoform; AltName: Full=Eukaryotic translation initiation factor 4C; Short=e
LE01Gene10043	0.522125	-0.937533	2.09728e-10	9.6921e-09	yes	down	_
LE01Gene01639	2.71748	1.44227	2.16779e-10	9.96296e-09	yes	up	RecName: Full=Putative tyrosine phosphatase 123R
LE01Gene05613	0.372083	-1.4263	2.17424e-10	9.96296e-09	yes	down	_
LE01Gene03527	1.60296	0.680742	2.19639e-10	1.00222e-08	yes	up	_
LE01Gene07012	1.80526	0.852209	2.37823e-10	1.08065e-08	yes	up	RecName: Full=Phospho-2-dehydro-3-deoxyheptonate aldolase; AltName: Full=3-deoxy-D-arabino-heptulosonate 7-phosphate synthase; AltName: Full=DAHP synthase; AltName:
LE01Gene03403	0.516629	-0.9528	2.72927e-10	1.22987e-08	yes	down	RecName: Full=Putative DNA helicase INO80
LE01Gene08310	0.202705	-2.30255	2.72802e-10	1.22987e-08	yes	down	RecName: Full=Glutathione S-transferase 2; AltName: Full=GST-II
LE01Gene04101	2.43768	1.28551	2.77536e-10	1.24547e-08	yes	up	_
LE01Gene00345	0.421795	-1.24538	2.85641e-10	1.27134e-08	yes	down	RecName: Full=Deoxycytidylate deaminase; AltName: Full=dCMP deaminase
LE01Gene11013	2.41023	1.26917	2.851e-10	1.27134e-08	yes	up	RecName: Full=Putative fumarate reductase; AltName: Full=FAD-dependent oxidoreductase FRDS; AltName: Full=NADH; AltName: Full=NADH-dependent fumarate reductase
LE01Gene01173	0.449103	-1.15488	2.88022e-10	1.2767e-08	yes	down	_
LE01Gene01692	2.07811	1.05527	2.91611e-10	1.28736e-08	yes	up	_
LE01Gene04813	0.279957	-1.83672	3.1356e-10	1.37865e-08	yes	down	RecName: Full=Diacetyl reductase
LE01Gene11017	0.583167	-0.778019	3.55961e-10	1.55877e-08	yes	down	RecName: Full=Guanine nucleotide-binding protein alpha-4 subunit
LE01Gene12158	2.18556	1.12801	3.57511e-10	1.55927e-08	yes	up	RecName: Full=Heme oxygenase 1; Short=HO-1
LE01Gene09537	0.460326	-1.11927	3.59666e-10	1.56239e-08	yes	down	RecName: Full=Cytochrome P450 2F2; AltName: Full=CYPIIF2; AltName: Full=Cytochrome P450-NAH-2; AltName: Full=Naphthalene dehydrogenase; AltName: Full=Naphthalene hyd
LE01Gene09517	0.345792	-1.53202	3.62336e-10	1.56772e-08	yes	down	_
LE01Gene05668	4.9138	2.29684	3.66726e-10	1.58041e-08	yes	up	_
LE01Gene12245	4.11617	2.0413	5.02379e-10	2.15646e-08	yes	up	RecName: Full=RING-H2 finger protein ATL48; AltName: Full=YGHL1-C3HC4 RING fusion protein
LE01Gene02824	4.39067	2.13444	5.61767e-10	2.40188e-08	yes	up	RecName: Full=Transcription factor prr1; AltName: Full=Pombe response regulator 1
LE01Gene11679	2.94531	1.55842	5.68305e-10	2.41183e-08	yes	up	RecName: Full=SDO1-like protein C21C3.19
LE01Gene12509	2.06854	1.04861	5.68535e-10	2.41183e-08	yes	up	_
LE01Gene06454	10.993	3.45851	5.84231e-10	2.46877e-08	yes	up	_
LE01Gene01312	2.02642	1.01893	5.99109e-10	2.52183e-08	yes	up	_
LE01Gene05475	2.06907	1.04898	6.25197e-10	2.62148e-08	yes	up	RecName: Full=Cytochrome c oxidase assembly protein COX15
LE01Gene06607	2.76335	1.46642	6.86063e-10	2.86563e-08	yes	up	RecName: Full=Histone-lysine N-methyltransferase, H3 lysine-79 specific; AltName: Full=Disruptor of telomeric silencing A; AltName: Full=Histone H3-K79 methyltran
LE01Gene02300	0.370713	-1.43162	7.06665e-10	2.94037e-08	yes	down	RecName: Full=Serine/threonine-protein kinase ssp1
LE01Gene13117	0.638361	-0.647555	7.20526e-10	2.98535e-08	yes	down	RecName: Full=Dolichol kinase
LE01Gene01954	1.8738	0.905967	7.22971e-10	2.98535e-08	yes	up	_
LE01Gene09590	0.634656	-0.655952	7.998e-10	3.29009e-08	yes	down	_
LE01Gene01102	0.574944	-0.798508	8.13225e-10	3.32016e-08	yes	down	RecName: Full=Mitochondrial import inner membrane translocase subunit tim14; AltName: Full=Presequence translocated-associated motor subunit pam18
LE01Gene08037	3.78149	1.91895	8.69181e-10	3.53532e-08	yes	up	_
LE01Gene02993	0.13239	-2.91713	9.63344e-10	3.9037e-08	yes	down	RecName: Full=Uncharacterized membrane protein YFL054C
LE01Gene12156	1.78031	0.832124	9.68757e-10	3.91104e-08	yes	up	RecName: Full=Bacitracin synthase 3; Short=BA3; Includes: RecName: Full=ATP-dependent isoleucine adenylase; Short=IleA; AltName: Full=Isoleucine activase; Includes:
LE01Gene03018	0.345965	-1.5313	1.11251e-09	4.47475e-08	yes	down	_
LE01Gene01876	1.87568	0.907412	1.128e-09	4.51858e-08	yes	up	_
LE01Gene07088	2.56192	1.35722	1.13172e-09	4.51858e-08	yes	up	RecName: Full=Cell wall protein PRY3; AltName: Full=Pathogenesis-related protein 3; Flags: Precursor
LE01Gene01567	0.215176	-2.21641	1.23756e-09	4.90507e-08	yes	down	RecName: Full=3-ketodihydrosphingosine reductase TSC10; AltName: Full=3-dehydrosphinganine reductase; AltName: Full=KDS reductase
LE01Gene04662	0.36983	-1.43507	1.23485e-09	4.90507e-08	yes	down	_
LE01Gene00370	6.82659	2.77117	1.24947e-09	4.93429e-08	yes	up	_
LE01Gene08841	2.8432	1.50751	1.45847e-09	5.73876e-08	yes	up	_
LE01Gene09003	2.331	1.22095	1.47506e-09	5.7831e-08	yes	up	RecName: Full=Benzoate--CoA ligase; AltName: Full=Benzoyl-CoA synthetase
LE01Gene00017	3.37301	1.75403	1.63853e-09	6.40089e-08	yes	up	RecName: Full=Caffeine resistance protein 5
LE01Gene00140	0.469733	-1.09009	2.08331e-09	8.10922e-08	yes	down	_
LE01Gene05591	0.415962	-1.26548	2.29792e-09	8.88094e-08	yes	down	_
LE01Gene05614	0.503055	-0.991212	2.30805e-09	8.88847e-08	yes	down	RecName: Full=WD repeat-containing protein wat1; AltName: Full=WD repeat-containing protein pop3
LE01Gene01736	0.342348	-1.54647	2.47446e-09	9.49562e-08	yes	down	_
LE01Gene07959	4.24945	2.08727	2.8415e-09	1.08657e-07	yes	up	RecName: Full=Putative fumarate reductase; AltName: Full=FAD-dependent oxidoreductase FRDS; AltName: Full=NADH; AltName: Full=NADH-dependent fumarate reductase
LE01Gene08475	2.54556	1.34798	3.14763e-09	1.19522e-07	yes	up	_
LE01Gene12982	1.80406	0.851248	3.13663e-09	1.19522e-07	yes	up	RecName: Full=Transcription factor atf1; AltName: Full=Protein sss1; AltName: Full=Transcription factor mts1
LE01Gene01920	0.583685	-0.776737	3.33909e-09	1.2635e-07	yes	down	RecName: Full=Zinc finger protein C25B8.19c
LE01Gene13123	0.485328	-1.04297	3.4977e-09	1.31892e-07	yes	down	_
LE01Gene08961	1.64273	0.716096	3.52238e-09	1.32363e-07	yes	up	RecName: Full=Epidermal growth factor receptor substrate 15-like 1; AltName: Full=Eps15-related protein; Short=Eps15R
LE01Gene00879	2.34839	1.23167	3.61127e-09	1.35236e-07	yes	up	RecName: Full=NEDD8-activating enzyme E1 catalytic subunit; AltName: Full=NEDD8-activating enzyme E1C; AltName: Full=Ubiquitin-activating enzyme E1C; AltName: Full=
LE01Gene05658	1.66717	0.7374	3.72475e-09	1.39006e-07	yes	up	_
LE01Gene02333	3.7155	1.89356	3.74098e-09	1.39134e-07	yes	up	_
LE01Gene00220	13.2878	3.73204	3.8439e-09	1.42474e-07	yes	up	_
LE01Gene01392	0.624641	-0.6789	4.26589e-09	1.57577e-07	yes	down	_
LE01Gene07270	2.04804	1.03425	4.36902e-09	1.60839e-07	yes	up	RecName: Full=NADH-cytochrome b5 reductase 1; AltName: Full=Microsomal cytochrome b reductase
LE01Gene01372	0.229496	-2.12346	4.39798e-09	1.61358e-07	yes	down	RecName: Full=Laccase-5; AltName: Full=Benzenediol:oxygen oxidoreductase 5; AltName: Full=Diphenol oxidase 5; AltName: Full=Urishiol oxidase 5; Flags: Precursor
LE01Gene03870	0.521826	-0.93836	4.49543e-09	1.63279e-07	yes	down	RecName: Full=Sulfite oxidase, mitochondrial; Flags: Precursor
LE01Gene03194	0.649289	-0.623066	4.47575e-09	1.63279e-07	yes	down	_
LE01Gene03814	44.6435	5.48038	4.4849e-09	1.63279e-07	yes	up	_
LE01Gene10735	0.512777	-0.963597	4.62431e-09	1.66844e-07	yes	down	RecName: Full=ATP-dependent rRNA helicase RRP3
LE01Gene09431	1.6834	0.751374	4.61125e-09	1.66844e-07	yes	up	_
LE01Gene11267	1.61706	0.693371	4.65034e-09	1.67227e-07	yes	up	RecName: Full=Dual specificity protein phosphatase 15; AltName: Full=Dual specificity protein phosphatase T-DSP10
LE01Gene02150	3.92676	1.97334	4.72966e-09	1.69518e-07	yes	up	_
LE01Gene08470	0.548486	-0.866473	5.10624e-09	1.82414e-07	yes	down	_
LE01Gene13126	0.533766	-0.905722	5.43619e-09	1.93564e-07	yes	down	_
LE01Gene08286	0.643341	-0.636345	5.46284e-09	1.93877e-07	yes	down	RecName: Full=ER degradation-enhancing alpha-mannosidase-like protein 1; Flags: Precursor
LE01Gene01583	0.506235	-0.982121	5.61719e-09	1.98706e-07	yes	down	RecName: Full=U3 small nucleolar RNA-associated protein 15 homolog
LE01Gene10254	0.54992	-0.862706	5.81221e-09	2.04937e-07	yes	down	_
LE01Gene01031	0.609168	-0.715087	5.93031e-09	2.08424e-07	yes	down	RecName: Full=Nuclear cap-binding protein subunit 1; AltName: Full=80 kDa nuclear cap-binding protein; Short=CBP80; Short=NCBP 80 kDa subunit
LE01Gene14706	1.68958	0.756662	6.19953e-09	2.17184e-07	yes	up	_
LE01Gene00177	2.16868	1.11681	6.38961e-09	2.23123e-07	yes	up	_
LE01Gene02355	2.31891	1.21344	6.44292e-09	2.24263e-07	yes	up	RecName: Full=Protein transport protein SEC31
LE01Gene10674	2.16957	1.11741	6.65943e-09	2.31059e-07	yes	up	RecName: Full=Protein yippee-like At3g08990
LE01Gene04877	0.529201	-0.918114	6.79817e-09	2.35122e-07	yes	down	RecName: Full=UPF0652 protein
LE01Gene12345	1.86711	0.900804	6.90036e-09	2.37898e-07	yes	up	_
LE01Gene12500	1.67187	0.741459	7.10539e-09	2.44191e-07	yes	up	RecName: Full=Cytochrome b-245 heavy chain; AltName: Full=CGD91-phox; AltName: Full=Cytochrome b(558) subunit beta; Short=Cytochrome b558 subunit beta; AltName: Full=
LE01Gene11375	2.08869	1.0626	7.40551e-09	2.53703e-07	yes	up	_
LE01Gene13022	0.20066	-2.31717	7.99064e-09	2.72888e-07	yes	down	RecName: Full=Monocarboxylate transporter 10; Short=MCT 10; AltName: Full=Solute carrier family 16 member 10
LE01Gene12734	3.63357	1.86139	8.96779e-09	3.05299e-07	yes	up	RecName: Full=UDP-glucose 4-epimerase GEPI48; AltName: Full=Galactowaldenase; AltName: Full=UDP-galactose 4-epimerase
LE01Gene00655	6.9258	2.79198	9.1258e-09	3.09707e-07	yes	up	_
LE01Gene08536	0.39776	-1.33003	1.01058e-08	3.41898e-07	yes	down	RecName: Full=Octanoyltransferase; AltName: Full=Lipoate-protein ligase B; AltName: Full=Lipoyl/octanoyl transferase; AltName: Full=Octanoyl-
LE01Gene12162	0.609668	-0.713904	1.07898e-08	3.63904e-07	yes	down	_
LE01Gene12455	0.457218	-1.12905	1.08989e-08	3.66448e-07	yes	down	_
LE01Gene01479	1.72259	0.784582	1.15638e-08	3.876e-07	yes	up	_
LE01Gene03172	2.10439	1.0734	1.17487e-08	3.92587e-07	yes	up	RecName: Full=Copper resistance protein CRF1; AltName: Full=YlCRF1
LE01Gene10658	17.8468	4.15759	1.18091e-08	3.93396e-07	yes	up	_
LE01Gene11110	3.40087	1.7659	1.18489e-08	3.93513e-07	yes	up	_
LE01Gene05248	0.284513	-1.81344	1.19153e-08	3.94402e-07	yes	down	RecName: Full=Demethylrebeccamycin-D-glucose O-methyltransferase; AltName: Full=Rebeccamycin O-methyltransferase; AltName: Full=Rebeccamycin sugar 4'-O-methyltrans
LE01Gene13371	4.97703	2.31529	1.19483e-08	3.94402e-07	yes	up	_
LE01Gene13730	2.21903	1.14993	1.26606e-08	4.16648e-07	yes	up	RecName: Full=Serine/threonine-protein kinase HSL1
LE01Gene09744	2.49284	1.31779	1.32084e-08	4.33362e-07	yes	up	RecName: Full=Aspartic protease pepB; AltName: Full=Propenicillopepsin-JT3; Flags: Precursor
LE01Gene06030	12.4641	3.63971	1.39555e-08	4.56496e-07	yes	up	RecName: Full=Gamma-glutamyltranspeptidase 1; AltName: Full=Gamma-glutamyltransferase 1; AltName: Full=Glutathione hydrolase 1; Contains: RecName: Full=Gamma-glutam
LE01Gene06462	1.63132	0.706039	1.40151e-08	4.57068e-07	yes	up	_
LE01Gene08335	0.575819	-0.796311	1.40791e-08	4.57782e-07	yes	down	_
LE01Gene02585	0.237547	-2.07371	1.41982e-08	4.60276e-07	yes	down	_
LE01Gene09650	0.530627	-0.914229	1.43091e-08	4.6249e-07	yes	down	RecName: Full=Maintenance of ploidy protein mob2
LE01Gene10783	1.93085	0.949236	1.4822e-08	4.77646e-07	yes	up	RecName: Full=Eukaryotic translation initiation factor 4E-4; Short=eIF-4E-4; Short=eIF4E-4; AltName: Full=eIF-4F 25 kDa subunit; AltName: Full=mRNA cap-binding prot
LE01Gene10731	12.7967	3.6777	1.49521e-08	4.80413e-07	yes	up	RecName: Full=Guanyl-specific ribonuclease F1; Short=RNase F1; Flags: Precursor
LE01Gene05460	0.574284	-0.800163	1.54002e-08	4.93353e-07	yes	down	RecName: Full=Protein transport protein sec22
LE01Gene03013	0.180957	-2.46628	1.59169e-08	5.08405e-07	yes	down	RecName: Full=Hydrophobin-1; Flags: Precursor
LE01Gene07459	0.48292	-1.05015	1.59951e-08	5.09403e-07	yes	down	RecName: Full=Beta-(1--)2)glucan export ATP-binding/permease protein NdvA
LE01Gene10973	0.433432	-1.20612	1.62161e-08	5.14933e-07	yes	down	_
LE01Gene08450	4.553	2.18682	1.64836e-08	5.219e-07	yes	up	RecName: Full=Cytochrome P450 52A6; AltName: Full=Alkane-inducible P450-ALK3; AltName: Full=CYPLIIA6
LE01Gene07268	0.646444	-0.629404	1.66487e-08	5.25595e-07	yes	down	RecName: Full=Golgi apparatus membrane protein TVP23
LE01Gene11540	0.480326	-1.05791	1.69814e-08	5.34544e-07	yes	down	_
LE01Gene02385	1.62193	0.697713	1.74556e-08	5.47884e-07	yes	up	_
LE01Gene00199	3.49184	1.80399	1.76999e-08	5.5395e-07	yes	up	_
LE01Gene01671	2.58524	1.3703	1.81249e-08	5.65622e-07	yes	up	_
LE01Gene03441	1.83115	0.872747	1.82967e-08	5.69348e-07	yes	up	_
LE01Gene08067	2.04623	1.03297	1.8372e-08	5.70058e-07	yes	up	RecName: Full=Serine/threonine-protein kinase fray2; AltName: Full=STE20-like kinase fray2
LE01Gene06828	2.43323	1.28287	1.8431e-08	5.70258e-07	yes	up	_
LE01Gene02425	0.289708	-1.78733	1.88611e-08	5.81908e-07	yes	down	RecName: Full=37S ribosomal protein mrp10, mitochondrial
LE01Gene13000	0.602795	-0.73026	1.9824e-08	6.09883e-07	yes	down	RecName: Full=Cytosolic Fe-S cluster assembly factor CFD1; AltName: Full=Cytosolic Fe-S cluster-deficient protein 1
LE01Gene02264	9.53693	3.25352	2.06541e-08	6.33625e-07	yes	up	RecName: Full=N-acetylgalactosamine kinase; AltName: Full=GalNAc kinase; AltName: Full=Galactokinase 2
LE01Gene07741	0.504414	-0.987319	2.07545e-08	6.34913e-07	yes	down	_
LE01Gene03261	0.0466775	-4.42113	2.0922e-08	6.38239e-07	yes	down	_
LE01Gene08330	0.33193	-1.59105	2.10889e-08	6.39736e-07	yes	down	RecName: Full=Laccase-2; AltName: Full=Benzenediol:oxygen oxidoreductase 2; AltName: Full=Diphenol oxidase 2; AltName: Full=Urishiol oxidase 2; Flags: Precursor
LE01Gene11671	0.522675	-0.936013	2.10606e-08	6.39736e-07	yes	down	_
LE01Gene02791	0.431605	-1.21222	2.18795e-08	6.61871e-07	yes	down	RecName: Full=Mulatexin; Short=MLX56; AltName: Full=Latex protein; Flags: Precursor
LE01Gene00981	7.34495	2.87675	2.36254e-08	7.10725e-07	yes	up	_
LE01Gene11893	0.343151	-1.54309	2.35789e-08	7.10725e-07	yes	down	_
LE01Gene11241	0.423031	-1.24116	2.39451e-08	7.18354e-07	yes	down	_
LE01Gene04024	0.446016	-1.16483	2.42304e-08	7.2491e-07	yes	down	_
LE01Gene12414	0.412643	-1.27704	2.47292e-08	7.378e-07	yes	down	_
LE01Gene00637	1.50265	0.587509	2.57124e-08	7.65032e-07	yes	up	_
LE01Gene05574	2.06473	1.04595	2.73415e-08	8.1128e-07	yes	up	_
LE01Gene04526	0.370963	-1.43065	2.79307e-08	8.24258e-07	yes	down	RecName: Full=Cytochrome P450 71B22
LE01Gene09518	0.412633	-1.27707	2.78799e-08	8.24258e-07	yes	down	_
LE01Gene05486	2.95775	1.5645	2.85105e-08	8.39089e-07	yes	up	_
LE01Gene03684	0.466927	-1.09873	2.90752e-08	8.53398e-07	yes	down	RecName: Full=U6 snRNA-associated Sm-like protein LSm7
LE01Gene04040	0.647081	-0.627982	2.96179e-08	8.64651e-07	yes	down	RecName: Full=Septin homolog spn3
LE01Gene10019	0.663933	-0.590891	2.95717e-08	8.64651e-07	yes	down	_
LE01Gene08259	1.92184	0.942488	3.19011e-08	9.2881e-07	yes	up	_
LE01Gene08621	1.61149	0.688398	3.23146e-08	9.38334e-07	yes	up	_
LE01Gene03051	0.613514	-0.704832	3.41124e-08	9.87895e-07	yes	down	RecName: Full=Uncharacterized protein YLR099W-A
LE01Gene02354	2.94694	1.55922	3.61542e-08	1.04424e-06	yes	up	RecName: Full=Probable D-xylulose kinase A; Short=Xylulokinase A
LE01Gene10296	1.58543	0.664878	3.65884e-08	1.05119e-06	yes	up	_
LE01Gene02107	3.09433	1.62963	3.72153e-08	1.06638e-06	yes	up	RecName: Full=Putative N-acetylglucosamine-6-phosphate deacetylase; AltName: Full=GlcNAc 6-P deacetylase
LE01Gene12161	0.372103	-1.42623	3.75571e-08	1.07334e-06	yes	down	_
LE01Gene00970	2.41752	1.27353	3.79694e-08	1.08228e-06	yes	up	_
LE01Gene13722	4.2691	2.09393	3.80929e-08	1.08296e-06	yes	up	RecName: Full=Conidial yellow pigment biosynthesis polyketide synthase; Short=PKS
LE01Gene02714	4.52202	2.17697	4.1236e-08	1.16789e-06	yes	up	RecName: Full=Aspartic protease; Flags: Precursor
LE01Gene04023	0.38352	-1.38262	4.12956e-08	1.16789e-06	yes	down	RecName: Full=Acetoacetyl-CoA synthetase
LE01Gene08990	0.584334	-0.775136	4.17993e-08	1.17907e-06	yes	down	_
LE01Gene09834	0.482197	-1.0523	4.24574e-08	1.19453e-06	yes	down	_
LE01Gene04582	0.564164	-0.825814	4.34166e-08	1.21522e-06	yes	down	RecName: Full=Heat shock factor protein; Short=HSF; AltName: Full=Heat shock transcription factor; Short=HSTF
LE01Gene05086	0.420029	-1.25144	4.56632e-08	1.27481e-06	yes	down	RecName: Full=O-methylsterigmatocystin oxidoreductase; Short=OMST oxidoreductase; AltName: Full=Aflatoxin B synthase; AltName: Full=Aflatoxin biosynthesis protein Q;
LE01Gene00652	0.297252	-1.75024	4.86977e-08	1.35546e-06	yes	down	RecName: Full=Zinc finger MYND domain-containing protein 10 homolog
LE01Gene03078	0.257179	-1.95916	4.88017e-08	1.35546e-06	yes	down	RecName: Full=RNA exonuclease 4
LE01Gene10850	3.6316	1.8606	4.99557e-08	1.38398e-06	yes	up	_
LE01Gene10089	2.71238	1.43956	5.11132e-08	1.41244e-06	yes	up	RecName: Full=Aspartate--tRNA ligase, cytoplasmic; AltName: Full=Aspartyl-tRNA synthetase; Short=AspRS
LE01Gene09523	0.659059	-0.601521	5.12546e-08	1.41275e-06	yes	down	RecName: Full=Endoplasmic reticulum-Golgi intermediate compartment protein 3; AltName: Full=Serologically defined breast cancer antigen NY-BR-84
LE01Gene08435	8.27891	3.04944	5.30994e-08	1.4599e-06	yes	up	_
LE01Gene13422	0.521601	-0.93898	5.35318e-08	1.46807e-06	yes	down	RecName: Full=Aldehyde dehydrogenase; Short=ALDDH; Short=ALDH
LE01Gene02561	1.60949	0.686606	5.42988e-08	1.48535e-06	yes	up	_
LE01Gene06842	0.418963	-1.2551	5.5668e-08	1.51898e-06	yes	down	_
LE01Gene07592	0.309007	-1.69429	5.69076e-08	1.54504e-06	yes	down	_
LE01Gene02621	1.89128	0.919363	5.6832e-08	1.54504e-06	yes	up	_
LE01Gene00979	4.52404	2.17761	5.71421e-08	1.54754e-06	yes	up	_
LE01Gene03509	0.591805	-0.756807	5.86106e-08	1.58336e-06	yes	down	RecName: Full=Probable 20S rRNA accumulation protein 4
LE01Gene04041	28.4599	4.83086	5.89933e-08	1.58975e-06	yes	up	_
LE01Gene07961	4.01149	2.00414	6.08823e-08	1.63659e-06	yes	up	RecName: Full=Exoglucanase 1; AltName: Full=1,4-beta-cellobiohydrolase; AltName: Full=Exocellobiohydrolase I; AltName: Full=Exoglucanase I; Flags: Precursor
LE01Gene07283	1.56046	0.641967	6.17075e-08	1.65468e-06	yes	up	_
LE01Gene04560	0.548575	-0.86624	6.39448e-08	1.71045e-06	yes	down	RecName: Full=Probable Dol-P-Man:Man(7)GlcNAc(2)-PP-Dol alpha-1,6-mannosyltransferase; AltName: Full=Asparagine-linked glycosylation protein 12 homolog; AltName: F
LE01Gene01219	2.84524	1.50855	6.48632e-08	1.73075e-06	yes	up	_
LE01Gene07981	0.380539	-1.39389	6.89829e-08	1.83616e-06	yes	down	_
LE01Gene07204	4.73365	2.24295	6.92007e-08	1.83746e-06	yes	up	RecName: Full=17.6 kDa class I heat shock protein 2; AltName: Full=17.6 kDa heat shock protein 2; Short=AtHsp17.6B
LE01Gene03144	0.418508	-1.25667	7.01888e-08	1.85915e-06	yes	down	RecName: Full=Probable mitochondrial pyruvate carrier 2; Short=MPC2
LE01Gene01369	0.59148	-0.757598	7.07818e-08	1.87029e-06	yes	down	RecName: Full=Raf homolog serine/threonine-protein kinase; AltName: Full=Abnormal cell lineage protein 45
LE01Gene06662	2.48687	1.31433	7.09927e-08	1.87131e-06	yes	up	_
LE01Gene05320	1.75865	0.81447	7.22841e-08	1.90074e-06	yes	up	RecName: Full=Protein zds1; AltName: Full=Meiotically up-regulated gene 88 protein
LE01Gene04517	0.338115	-1.56441	7.28895e-08	1.91203e-06	yes	down	RecName: Full=Tryprostatin B 6-hydroxylase; AltName: Full=Fumitremorgin biosynthesis protein C FTMC_ASPFU RecName: Full=Tryprostatin B 6-h
LE01Gene04984	1.85392	0.890576	7.5444e-08	1.97427e-06	yes	up	_
LE01Gene03171	1.6316	0.70629	7.61881e-08	1.98895e-06	yes	up	_
LE01Gene04345	1.57589	0.656163	7.67334e-08	1.99838e-06	yes	up	RecName: Full=Glucosylceramidase; AltName: Full=Acid beta-glucosidase; AltName: Full=Beta-glucocerebrosidase; AltName: Full=D-glucosyl-N-acylsphingosine glucohydro
LE01Gene07055	0.365009	-1.454	7.81183e-08	2.02958e-06	yes	down	RecName: Full=Phenol 2-monooxygenase; AltName: Full=Phenol hydroxylase
LE01Gene04468	0.587547	-0.767223	8.08374e-08	2.09521e-06	yes	down	RecName: Full=O-methylsterigmatocystin oxidoreductase; Short=OMST oxidoreductase; AltName: Full=Aflatoxin B synthase; AltName: Full=Aflatoxin biosynthesis protein Q;
LE01Gene00678	0.557535	-0.842865	8.35716e-08	2.16092e-06	yes	down	RecName: Full=Malignant T-cell-amplified sequence 1; Short=MCT-1
LE01Gene07257	0.560563	-0.835051	8.39852e-08	2.16646e-06	yes	down	RecName: Full=Uncharacterized membrane protein MJ0933
LE01Gene07867	0.600987	-0.734595	8.4452e-08	2.17334e-06	yes	down	_
LE01Gene09182	0.42093	-1.24835	8.48992e-08	2.17968e-06	yes	down	_
LE01Gene00200	0.500162	-0.999534	8.54916e-08	2.18971e-06	yes	down	RecName: Full=Nuclear nucleic acid-binding protein C1D
LE01Gene13222	1.93274	0.950651	8.59621e-08	2.19658e-06	yes	up	_
LE01Gene01605	2.45636	1.29652	8.67277e-08	2.21095e-06	yes	up	_
LE01Gene11597	0.489334	-1.03111	8.84713e-08	2.25011e-06	yes	down	_
LE01Gene05197	11.7979	3.56046	9.44156e-08	2.39569e-06	yes	up	_
LE01Gene00260	2.35459	1.23547	9.67653e-08	2.44958e-06	yes	up	RecName: Full=Sequestosome-1; AltName: Full=EBI3-associated protein of 60 kDa; Short=EBIAP; Short=p60; AltName: Full=Phosphotyrosine-independent ligand for the Lck
LE01Gene11450	0.53746	-0.895772	9.93515e-08	2.49759e-06	yes	down	_
LE01Gene00891	3.00509	1.58741	9.91764e-08	2.49759e-06	yes	up	RecName: Full=Glucose-induced degradation protein 4 homolog; AltName: Full=Vacuolar import and degradation protein 24 homolog
LE01Gene04247	0.56765	-0.816926	9.90184e-08	2.49759e-06	yes	down	RecName: Full=Ribose-5-phosphate isomerase; AltName: Full=D-ribose-5-phosphate ketol-isomerase; AltName: Full=Phosphoriboisomerase
LE01Gene00964	3.62352	1.85739	1.03963e-07	2.60147e-06	yes	up	_
LE01Gene05312	0.0228626	-5.45087	1.06116e-07	2.64924e-06	yes	down	RecName: Full=Serine protease inhibitor
LE01Gene11307	1.78526	0.836134	1.06404e-07	2.65034e-06	yes	up	RecName: Full=Senecionine N-oxygenase; Short=SNO; Flags: Precursor
LE01Gene07731	6.36829	2.67091	1.19113e-07	2.9601e-06	yes	up	_
LE01Gene11040	0.577041	-0.793255	1.23411e-07	3.05991e-06	yes	down	RecName: Full=Probable glucan 1,3-beta-glucosidase A; AltName: Full=Exo-1,3-beta-glucanase 1; AltName: Full=Exo-1,3-beta-glucanase A; Flags: Precursor
LE01Gene05403	3.01147	1.59047	1.24476e-07	3.0723e-06	yes	up	_
LE01Gene05941	5.33906	2.41659	1.24278e-07	3.0723e-06	yes	up	_
LE01Gene07314	1.9309	0.949272	1.26221e-07	3.10829e-06	yes	up	_
LE01Gene00429	0.48547	-1.04255	1.28813e-07	3.16495e-06	yes	down	RecName: Full=DNA-directed RNA polymerases I, II, and III subunit RPABC2; Short=RNA polymerases I, II, and III subunit ABC2; AltName: Full=DNA-directed RNA polymeras
LE01Gene07962	11.9465	3.57852	1.39391e-07	3.41713e-06	yes	up	_
LE01Gene07382	10.9124	3.4479	1.41419e-07	3.45902e-06	yes	up	_
LE01Gene01354	0.436019	-1.19754	1.42154e-07	3.46919e-06	yes	down	RecName: Full=Oxalate decarboxylase OxdC
LE01Gene03309	9.61716	3.26561	1.44293e-07	3.51351e-06	yes	up	_
LE01Gene13975	5.59326	2.48369	1.51372e-07	3.67762e-06	yes	up	_
LE01Gene12292	4.90254	2.29353	1.55697e-07	3.77427e-06	yes	up	RecName: Full=Amino-acid acetyltransferase, mitochondrial; AltName: Full=Arginine-requiring protein 2; AltName: Full=Glutamate N-acetyltransferase; AltName: Full=N
LE01Gene07683	0.613881	-0.703969	1.57417e-07	3.80746e-06	yes	down	RecName: Full=Cytochrome b5
LE01Gene00888	1.75872	0.814528	1.59138e-07	3.84054e-06	yes	up	_
LE01Gene01046	0.458111	-1.12623	1.62821e-07	3.9207e-06	yes	down	RecName: Full=Folate transporter 1, chloroplastic; Short=AtFOLT1
LE01Gene04955	0.198704	-2.33131	1.65959e-07	3.98743e-06	yes	down	_
LE01Gene01466	1.88801	0.916865	1.67246e-07	4.00946e-06	yes	up	RecName: Full=Serine/threonine-protein kinase cek1
LE01Gene03339	0.56107	-0.833747	1.69801e-07	4.06177e-06	yes	down	_
LE01Gene06550	9.22306	3.20524	1.70265e-07	4.0639e-06	yes	up	_
LE01Gene01600	2.4547	1.29555	1.75145e-07	4.16209e-06	yes	up	_
LE01Gene02088	0.348705	-1.51992	1.76717e-07	4.19028e-06	yes	down	RecName: Full=Mitochondrial import inner membrane translocase subunit TIM22 TIM22_CRYNJ RecName: Full=Mitochondrial import inner membrane
LE01Gene11324	2.06708	1.04759	1.77394e-07	4.19716e-06	yes	up	_
LE01Gene13021	0.373087	-1.42242	1.87697e-07	4.43128e-06	yes	down	_
LE01Gene11295	2.20441	1.14039	1.89306e-07	4.45564e-06	yes	up	_
LE01Gene07733	4.83574	2.27374	1.89549e-07	4.45564e-06	yes	up	_
LE01Gene10084	1.76241	0.817554	1.99442e-07	4.67762e-06	yes	up	_
LE01Gene12999	0.380499	-1.39404	1.99854e-07	4.67762e-06	yes	down	RecName: Full=Nucleolar protein 9; AltName: Full=Pumilio domain-containing protein NOP9
LE01Gene10150	0.431513	-1.21252	2.02417e-07	4.72741e-06	yes	down	_
LE01Gene13298	1.63421	0.708592	2.03436e-07	4.74103e-06	yes	up	_
LE01Gene13530	1.56782	0.648764	2.05274e-07	4.77362e-06	yes	up	_
LE01Gene13156	14.4392	3.85192	2.24077e-07	5.17833e-06	yes	up	RecName: Full=Delta(6)-protoilludene synthase; AltName: Full=6-protoilludene synthase
LE01Gene01175	3.0968	1.63078	2.25062e-07	5.17833e-06	yes	up	_
LE01Gene04271	1.58826	0.667451	2.24961e-07	5.17833e-06	yes	up	_
LE01Gene01060	4.71832	2.23827	2.25006e-07	5.17833e-06	yes	up	_
LE01Gene02268	0.39013	-1.35797	2.32796e-07	5.34496e-06	yes	down	_
LE01Gene04977	1.82005	0.863977	2.36439e-07	5.41714e-06	yes	up	RecName: Full=Membrane primary amine oxidase; AltName: Full=Copper amine oxidase; AltName: Full=HPAO; AltName: Full=Semicarbazide-sensitive amine oxidase; Short=SSAO
LE01Gene13121	0.596866	-0.744522	2.38843e-07	5.4607e-06	yes	down	RecName: Full=Putative methyltransferase C2C4.06c
LE01Gene03305	2.37174	1.24595	2.50702e-07	5.7078e-06	yes	up	RecName: Full=Hsp90 co-chaperone Cdc37; AltName: Full=Cell division control protein 37; AltName: Full=Hsp90 chaperone protein kinase-targeting subunit
LE01Gene14216	1.83467	0.875518	2.5256e-07	5.73807e-06	yes	up	RecName: Full=2,3-bisphosphoglycerate-independent phosphoglycerate mutase 1; Short=BPG-independent PGAM 1; Short=Phosphoglyceromutase 1; Short=iPGM 1
LE01Gene03304	1.95893	0.970064	2.5379e-07	5.75398e-06	yes	up	RecName: Full=Sensor protein GacS
LE01Gene08278	0.559546	-0.837671	2.60603e-07	5.89614e-06	yes	down	_
LE01Gene01135	2.31084	1.20842	2.63416e-07	5.9382e-06	yes	up	RecName: Full=Citrate synthase, peroxisomal; Flags: Precursor
LE01Gene12767	1.74221	0.800916	2.63555e-07	5.9382e-06	yes	up	RecName: Full=Isovaleryl-CoA dehydrogenase, mitochondrial; Short=IVD; Flags: Precursor
LE01Gene03418	0.369292	-1.43717	2.68351e-07	6.03374e-06	yes	down	RecName: Full=Probable cystathionine gamma-synthase; AltName: Full=O-succinylhomoserine (thiol)-lyase
LE01Gene11523	2.49423	1.31859	2.6937e-07	6.04413e-06	yes	up	_
LE01Gene05361	0.355602	-1.49166	2.70557e-07	6.05825e-06	yes	down	_
LE01Gene05287	1.70095	0.766341	2.74887e-07	6.12351e-06	yes	up	_
LE01Gene09783	0.602846	-0.730138	2.74644e-07	6.12351e-06	yes	down	RecName: Full=NAD-dependent protein deacetylase SIR4; AltName: Full=Regulatory protein SIR2 homolog 4; Flags: Precursor
LE01Gene09540	0.542462	-0.882406	2.75163e-07	6.12351e-06	yes	down	RecName: Full=Protein ral2
LE01Gene13633	51.9952	5.70031	2.76627e-07	6.1435e-06	yes	up	RecName: Full=WSC domain-containing protein 2
LE01Gene08529	0.330664	-1.59656	2.82015e-07	6.25037e-06	yes	down	_
LE01Gene00276	0.594984	-0.749078	2.84505e-07	6.29273e-06	yes	down	RecName: Full=Calcium-binding mitochondrial carrier protein Aralar1; AltName: Full=Mitochondrial aspartate glutamate carrier 1; AltName: Full=Solute carrier family
LE01Gene00626	1.96053	0.971244	2.86642e-07	6.32711e-06	yes	up	RecName: Full=Heat shock protein 82
LE01Gene08743	5.12322	2.35705	2.98944e-07	6.58525e-06	yes	up	RecName: Full=Histidine-rich glycoprotein; Flags: Precursor
LE01Gene03701	1.96431	0.97402	2.99798e-07	6.59071e-06	yes	up	_
LE01Gene01800	0.462008	-1.11401	3.02292e-07	6.6321e-06	yes	down	_
LE01Gene00445	0.38321	-1.38379	3.08346e-07	6.75129e-06	yes	down	RecName: Full=Microsomal glutathione S-transferase 3; Short=Microsomal GST-3; AltName: Full=Microsomal GST-III
LE01Gene05801	0.507177	-0.97944	3.11093e-07	6.79772e-06	yes	down	RecName: Full=3-ketodihydrosphingosine reductase TSC10; AltName: Full=3-dehydrosphinganine reductase; AltName: Full=KDS reductase
LE01Gene04738	4.95513	2.30892	3.13859e-07	6.8444e-06	yes	up	RecName: Full=Copper amine oxidase 1
LE01Gene01747	3.82057	1.93379	3.24851e-07	7.0699e-06	yes	up	_
LE01Gene04445	1.60453	0.682155	3.27173e-07	7.1062e-06	yes	up	_
LE01Gene01165	1.74417	0.802538	3.39842e-07	7.36664e-06	yes	up	RecName: Full=Cytochrome P450 2C7; AltName: Full=CYPIIC7; AltName: Full=Cytochrome P450F; AltName: Full=PTF1
LE01Gene05438	0.617691	-0.695044	3.4725e-07	7.51222e-06	yes	down	RecName: Full=Endosomal protein P24B; Flags: Precursor
LE01Gene01042	0.608556	-0.716537	3.59283e-07	7.74169e-06	yes	down	_
LE01Gene04249	0.649659	-0.622245	3.59228e-07	7.74169e-06	yes	down	RecName: Full=External alternative NADH-ubiquinone oxidoreductase, mitochondrial; AltName: Full=External alternative NADH dehydrogenase; AltName: Full=NADH:ubiquin
LE01Gene02241	0.459311	-1.12246	3.72931e-07	8.00401e-06	yes	down	RecName: Full=Tyrosine--tRNA ligase, mitochondrial; AltName: Full=Tyrosyl-tRNA synthetase; Short=TyrRS; Flags: Precursor
LE01Gene04644	3.20584	1.6807	3.72466e-07	8.00401e-06	yes	up	_
LE01Gene13571	1.82027	0.864151	3.78132e-07	8.0837e-06	yes	up	_
LE01Gene07444	2.18875	1.1301	3.85452e-07	8.22398e-06	yes	up	_
LE01Gene10611	1.82483	0.867764	3.8688e-07	8.23826e-06	yes	up	_
LE01Gene00195	0.361978	-1.46602	3.88204e-07	8.25029e-06	yes	down	_
LE01Gene13741	0.368625	-1.43977	3.99645e-07	8.47684e-06	yes	down	_
LE01Gene03101	0.424975	-1.23455	4.02098e-07	8.51226e-06	yes	down	RecName: Full=L-rhamnose-1-dehydrogenase
LE01Gene00312	0.598031	-0.741709	4.04429e-07	8.54494e-06	yes	down	_
LE01Gene14436	0.463538	-1.10924	4.11955e-07	8.65487e-06	yes	down	_
LE01Gene04416	0.643031	-0.63704	4.12023e-07	8.65487e-06	yes	down	RecName: Full=Bifunctional P-450:NADPH-P450 reductase; AltName: Full=Cytochrome P450foxy; AltName: Full=Fatty acid omega-hydroxylase; Includes: RecName: Full=Cytoch
LE01Gene09673	0.606244	-0.722029	4.10589e-07	8.65487e-06	yes	down	_
LE01Gene07047	1.6538	0.725784	4.18308e-07	8.76993e-06	yes	up	_
LE01Gene09339	1.66082	0.731896	4.49828e-07	9.39449e-06	yes	up	_
LE01Gene02248	0.64358	-0.635808	4.62e-07	9.63018e-06	yes	down	_
LE01Gene00587	2.25818	1.17516	4.66754e-07	9.71062e-06	yes	up	_
LE01Gene01783	1.98035	0.985753	4.67755e-07	9.71285e-06	yes	up	RecName: Full=Transcriptional activator HAP2
LE01Gene04143	2.01109	1.00798	4.72055e-07	9.78344e-06	yes	up	_
LE01Gene08764	0.464801	-1.10531	4.88533e-07	1.01057e-05	yes	down	_
LE01Gene05408	3.0139	1.59163	4.90435e-07	1.01257e-05	yes	up	_
LE01Gene03558	0.519897	-0.943703	5.00649e-07	1.0317e-05	yes	down	_
LE01Gene05800	0.566668	-0.819424	5.01649e-07	1.0318e-05	yes	down	RecName: Full=Uncharacterized protein YJL213W
LE01Gene02008	1.76255	0.817661	5.15243e-07	1.05576e-05	yes	up	_
LE01Gene12206	2.41623	1.27276	5.17933e-07	1.05928e-05	yes	up	_
LE01Gene08385	0.493528	-1.0188	5.36826e-07	1.09585e-05	yes	down	RecName: Full=Translocation protein sec62
LE01Gene03501	0.34901	-1.51866	5.52882e-07	1.12651e-05	yes	down	_
LE01Gene00853	1.81229	0.857816	5.56094e-07	1.13093e-05	yes	up	_
LE01Gene10164	2.71007	1.43833	5.6226e-07	1.14133e-05	yes	up	_
LE01Gene13267	1.90581	0.930403	5.65746e-07	1.14627e-05	yes	up	RecName: Full=O-methylsterigmatocystin oxidoreductase; Short=OMST oxidoreductase; AltName: Full=Aflatoxin B synthase; AltName: Full=Aflatoxin biosynthesis protein
LE01Gene01665	1.66684	0.73712	5.70527e-07	1.1538e-05	yes	up	_
LE01Gene07208	1.62609	0.701408	5.84866e-07	1.17841e-05	yes	up	_
LE01Gene04002	0.642453	-0.638337	5.90413e-07	1.18739e-05	yes	down	RecName: Full=Putative HC-toxin efflux carrier TOXA
LE01Gene09454	4.7061	2.23453	6.05802e-07	1.21608e-05	yes	up	_
LE01Gene03391	2.75167	1.46031	6.11727e-07	1.22571e-05	yes	up	_
LE01Gene04168	2.82371	1.49759	6.36636e-07	1.27327e-05	yes	up	_
LE01Gene14487	1.72587	0.78732	6.40331e-07	1.27831e-05	yes	up	_
LE01Gene07666	1.76421	0.819026	7.06438e-07	1.40511e-05	yes	up	RecName: Full=Fumarylacetoacetate hydrolase domain-containing protein 2
LE01Gene03570	0.00279699	-8.48191	7.08181e-07	1.406e-05	yes	down	_
LE01Gene02688	0.251574	-1.99094	7.18749e-07	1.42438e-05	yes	down	RecName: Full=Gluconate transport inducer 1
LE01Gene03654	2.99769	1.58385	7.53465e-07	1.49046e-05	yes	up	_
LE01Gene12166	1.51238	0.59682	7.55763e-07	1.49229e-05	yes	up	_
LE01Gene00851	0.329892	-1.59993	7.61238e-07	1.50037e-05	yes	down	RecName: Full=Uncharacterized ABC transporter ATP-binding protein C20G4.01
LE01Gene12023	3.25185	1.70126	7.65378e-07	1.5058e-05	yes	up	_
LE01Gene10128	1.86691	0.900649	7.77594e-07	1.52707e-05	yes	up	_
LE01Gene01105	0.46725	-1.09773	7.82299e-07	1.53353e-05	yes	down	_
LE01Gene11236	0.576829	-0.793784	7.90304e-07	1.54643e-05	yes	down	RecName: Full=Potential protein lysine methyltransferase SET6; AltName: Full=SET domain-containing protein 6
LE01Gene07223	1.77317	0.826334	8.04148e-07	1.57069e-05	yes	up	_
LE01Gene09211	2.15432	1.10724	8.11092e-07	1.58141e-05	yes	up	RecName: Full=Uncharacterized oxidoreductase C736.13
LE01Gene01381	0.520344	-0.942463	8.26996e-07	1.60953e-05	yes	down	RecName: Full=Uncharacterized protein YEL023C
LE01Gene05037	0.365241	-1.45308	8.83196e-07	1.71583e-05	yes	down	_
LE01Gene02646	1.76983	0.823608	8.9508e-07	1.73582e-05	yes	up	_
LE01Gene11292	3.67562	1.87799	9.02636e-07	1.74696e-05	yes	up	RecName: Full=Zinc finger protein rsv1; AltName: Full=Required for stationary phase viability protein 1
LE01Gene10244	0.166799	-2.58382	9.15999e-07	1.76692e-05	yes	down	_
LE01Gene13091	1.50115	0.586071	9.46741e-07	1.81975e-05	yes	up	_
LE01Gene12551	0.543453	-0.879773	9.53817e-07	1.83011e-05	yes	down	_
LE01Gene07396	0.555007	-0.849422	9.64496e-07	1.84734e-05	yes	down	RecName: Full=Uncharacterized protein C13G1.09
LE01Gene10215	0.433634	-1.20545	9.78948e-07	1.87172e-05	yes	down	RecName: Full=CTD kinase subunit gamma; Short=CTDK-I gamma subunit; AltName: Full=CTD kinase subunit 3
LE01Gene01408	3.10759	1.6358	9.80976e-07	1.8723e-05	yes	up	RecName: Full=Putative protein TPRXL
LE01Gene00267	0.623175	-0.682292	9.94177e-07	1.89417e-05	yes	down	RecName: Full=Putative DEAH-box ATP-dependent helicase UM11114
LE01Gene11586	0.433924	-1.20449	1.00722e-06	1.91566e-05	yes	down	_
LE01Gene11212	0.566265	-0.82045	1.01847e-06	1.93367e-05	yes	down	RecName: Full=Copia protein; AltName: Full=Gag-int-pol protein; Contains: RecName: Full=Copia VLP protein; Contains: RecName: Full=Copia protease
LE01Gene00275	105.089	6.71547	1.02722e-06	1.94687e-05	yes	up	RecName: Full=tRNA (guanine(37)-N1)-methyltransferase; AltName: Full=M1G-methyltransferase; AltName: Full=tRNA
LE01Gene01355	2.58062	1.36772	1.04185e-06	1.97117e-05	yes	up	_
LE01Gene03333	5.30603	2.40763	1.04599e-06	1.97547e-05	yes	up	_
LE01Gene11838	0.419921	-1.25181	1.0492e-06	1.97547e-05	yes	down	RecName: Full=Nucleolar protein 6; AltName: Full=Maternal transcript 89Ba
LE01Gene12432	1.5334	0.616738	1.05207e-06	1.97619e-05	yes	up	_
LE01Gene00553	0.385363	-1.37571	1.05821e-06	1.97619e-05	yes	down	_
LE01Gene11868	2.06985	1.04952	1.05629e-06	1.97619e-05	yes	up	_
LE01Gene04616	1.68737	0.754778	1.05906e-06	1.97619e-05	yes	up	_
LE01Gene02875	2.66918	1.41639	1.07639e-06	2.00507e-05	yes	up	RecName: Full=Serine palmitoyltransferase 2; Short=SPT 2; AltName: Full=Long chain base biosynthesis protein 2
LE01Gene13144	1.63123	0.705964	1.08558e-06	2.01527e-05	yes	up	_
LE01Gene00674	2.08332	1.05889	1.08972e-06	2.01952e-05	yes	up	RecName: Full=Lipoamide acyltransferase component of branched-chain alpha-keto acid dehydrogenase complex, mitochondrial; AltName: Full=Branched-chain alpha-keto acid
LE01Gene00381	1.68887	0.756056	1.10575e-06	2.04226e-05	yes	up	_
LE01Gene05252	0.618823	-0.692401	1.10532e-06	2.04226e-05	yes	down	_
LE01Gene07227	0.535584	-0.900817	1.11676e-06	2.05909e-05	yes	down	RecName: Full=Adenylate kinase isoenzyme 6 homolog; Short=AK6; AltName: Full=Dual activity adenylate kinase/ATPase; Short=AK/ATPase
LE01Gene07234	3.02681	1.5978	1.12726e-06	2.07492e-05	yes	up	_
LE01Gene13511	1.79302	0.842392	1.17967e-06	2.16054e-05	yes	up	RecName: Full=E3 ubiquitin-protein ligase listerin; AltName: Full=RING domain mutant killed by rtf1 deletion protein 1
LE01Gene05184	0.654297	-0.611982	1.17974e-06	2.16054e-05	yes	down	RecName: Full=UDP-glucose:glycoprotein glucosyltransferase; Short=UGT; Short=dUGT; AltName: Full=UDP--Glc:glycoprotein glucosyltransferase; Flags: Precursor
LE01Gene13029	0.371161	-1.42988	1.19748e-06	2.18933e-05	yes	down	_
LE01Gene13424	2.14028	1.0978	1.21471e-06	2.21709e-05	yes	up	_
LE01Gene00761	0.594266	-0.750819	1.21788e-06	2.21916e-05	yes	down	RecName: Full=Vacuolar protein sorting-associated protein 55
LE01Gene13387	2.34137	1.22735	1.22508e-06	2.22481e-05	yes	up	_
LE01Gene07637	0.64036	-0.643045	1.22497e-06	2.22481e-05	yes	down	_
LE01Gene00230	1.66788	0.738014	1.25986e-06	2.28035e-05	yes	up	RecName: Full=Sphingomyelin phosphodiesterase B; AltName: Full=Acid sphingomyelinase B; Short=aSMase B; Flags: Precursor
LE01Gene05806	0.66047	-0.598435	1.2664e-06	2.28837e-05	yes	down	RecName: Full=Protein PBDC1 homolog
LE01Gene14336	7.8452	2.97181	1.28344e-06	2.31532e-05	yes	up	_
LE01Gene01379	5.06168	2.33962	1.3242e-06	2.3843e-05	yes	up	_
LE01Gene08337	0.56068	-0.834751	1.32607e-06	2.3843e-05	yes	down	_
LE01Gene03492	0.615459	-0.700266	1.3792e-06	2.46499e-05	yes	down	_
LE01Gene00367	0.585289	-0.772778	1.38003e-06	2.46499e-05	yes	down	RecName: Full=Glycogenin-1; Short=GN-1; Short=GN1
LE01Gene12208	1.79941	0.847527	1.37976e-06	2.46499e-05	yes	up	RecName: Full=ATP-dependent kinase YFH7
LE01Gene08489	0.490168	-1.02865	1.39249e-06	2.48316e-05	yes	down	_
LE01Gene12753	3.16296	1.66127	1.41239e-06	2.51452e-05	yes	up	RecName: Full=Putative amidase C869.01; Flags: Precursor
LE01Gene09661	0.657287	-0.605404	1.42145e-06	2.52238e-05	yes	down	_
LE01Gene12547	1.51266	0.59709	1.42107e-06	2.52238e-05	yes	up	RecName: Full=ATP-citrate synthase subunit 1; AltName: Full=ATP-citrate (pro-S-)-lyase 1; AltName: Full=Citrate cleavage enzyme subunit 1
LE01Gene02853	1.54397	0.626649	1.44945e-06	2.56787e-05	yes	up	_
LE01Gene14002	2.26637	1.18038	1.4605e-06	2.58323e-05	yes	up	_
LE01Gene04075	2.30855	1.20699	1.48893e-06	2.62923e-05	yes	up	_
LE01Gene03610	0.488444	-1.03374	1.49233e-06	2.63095e-05	yes	down	RecName: Full=Protein kinase dsk1; AltName: Full=Dis1-suppressing protein kinase
LE01Gene08846	1.87506	0.90694	1.52296e-06	2.67667e-05	yes	up	RecName: Full=Nucleolin
LE01Gene04454	1.58166	0.661442	1.55774e-06	2.72465e-05	yes	up	RecName: Full=Uncharacterized protein C1039.02; Flags: Precursor
LE01Gene06035	6.46797	2.69331	1.55535e-06	2.72465e-05	yes	up	_
LE01Gene08393	1.65975	0.730969	1.55802e-06	2.72465e-05	yes	up	_
LE01Gene05765	1.745	0.80323	1.56181e-06	2.7269e-05	yes	up	_
LE01Gene03513	1.72553	0.787036	1.5866e-06	2.76212e-05	yes	up	_
LE01Gene10982	0.466314	-1.10063	1.59569e-06	2.77268e-05	yes	down	RecName: Full=Histone H4 H4_AGABI RecName: Full=Histone H4
LE01Gene04814	1.6832	0.751209	1.59894e-06	2.77388e-05	yes	up	RecName: Full=Uncharacterized transporter C460.05
LE01Gene08821	0.525892	-0.927161	1.64039e-06	2.84125e-05	yes	down	_
LE01Gene11698	1.92428	0.944321	1.70619e-06	2.94682e-05	yes	up	_
LE01Gene11085	0.427281	-1.22674	1.70677e-06	2.94682e-05	yes	down	_
LE01Gene11316	0.478295	-1.06403	1.71821e-06	2.96186e-05	yes	down	RecName: Full=1,25-dihydroxyvitamin D(3) 24-hydroxylase, mitochondrial; Short=24-OHase; Short=Vitamin D(3) 24-hydroxylase; AltName: Full=Cytochrome P450 24A1; AltN
LE01Gene02006	1.72496	0.78656	1.73677e-06	2.98911e-05	yes	up	_
LE01Gene12495	1.69609	0.76221	1.76367e-06	3.03062e-05	yes	up	_
LE01Gene08936	0.302883	-1.72317	1.76766e-06	3.03266e-05	yes	down	_
LE01Gene01723	0.444158	-1.17086	1.84797e-06	3.16545e-05	yes	down	RecName: Full=Probable mitochondrial pyruvate carrier 1; Short=MPC1
LE01Gene11595	0.663654	-0.591496	1.85723e-06	3.17631e-05	yes	down	RecName: Full=Proteasome subunit beta type-6; AltName: Full=Differentiation-associated proteasome subunit 1; Short=DAPS-1; Flags: Precursor
LE01Gene12994	2.45664	1.29668	1.88421e-06	3.21738e-05	yes	up	_
LE01Gene08311	0.11668	-3.09938	1.91407e-06	3.26323e-05	yes	down	_
LE01Gene06289	1.82826	0.870472	1.93175e-06	3.28821e-05	yes	up	_
LE01Gene10171	0.4646	-1.10594	1.97203e-06	3.35153e-05	yes	down	RecName: Full=P25 protein; AltName: Full=Brefeldin A resistance protein
LE01Gene00943	2.34092	1.22707	1.97894e-06	3.35277e-05	yes	up	RecName: Full=Acyl-CoA dehydrogenase family member 9, mitochondrial; Short=ACAD-9; Flags: Precursor
LE01Gene05104	2.13765	1.09603	1.97728e-06	3.35277e-05	yes	up	_
LE01Gene01390	0.358354	-1.48054	2.05417e-06	3.47481e-05	yes	down	RecName: Full=Farnesyl pyrophosphate synthase; Short=FPP synthase; Short=FPS; AltName: Full=(2E,6E)-farnesyl diphosphate synthase; AltName: Full=Dimethylallyltranstra
LE01Gene11690	0.658772	-0.602148	2.10479e-06	3.5549e-05	yes	down	RecName: Full=Uncharacterized protein RSN1; AltName: Full=Rescuer of SRO7 at high Nacl protein 1
LE01Gene07443	2.62164	1.39047	2.10961e-06	3.55751e-05	yes	up	RecName: Full=Laccase-2; AltName: Full=Benzenediol:oxygen oxidoreductase 2; AltName: Full=Diphenol oxidase 2; AltName: Full=Laccase I; AltName: Full=Urishiol oxidase
LE01Gene05169	0.228114	-2.13218	2.12237e-06	3.57348e-05	yes	down	_
LE01Gene00402	1.67429	0.743546	2.13199e-06	3.57859e-05	yes	up	_
LE01Gene00659	0.4211	-1.24777	2.12942e-06	3.57859e-05	yes	down	_
LE01Gene04246	0.535751	-0.900366	2.14238e-06	3.59046e-05	yes	down	RecName: Full=Probable mitochondrial chaperone BCS1-B; AltName: Full=BCS1-like protein 2
LE01Gene03220	2.07675	1.05432	2.21962e-06	3.71419e-05	yes	up	_
LE01Gene00311	3.08545	1.62548	2.23666e-06	3.73695e-05	yes	up	_
LE01Gene11642	1.5748	0.655169	2.26829e-06	3.78397e-05	yes	up	_
LE01Gene08402	2.12334	1.08634	2.33431e-06	3.88813e-05	yes	up	_
LE01Gene08894	0.454798	-1.1367	2.34339e-06	3.89131e-05	yes	down	_
LE01Gene08484	2.20154	1.13851	2.3421e-06	3.89131e-05	yes	up	_
LE01Gene04317	2.19264	1.13267	2.37514e-06	3.93802e-05	yes	up	_
LE01Gene10997	1.73145	0.79198	2.4036e-06	3.97913e-05	yes	up	_
LE01Gene11537	0.321397	-1.63757	2.42108e-06	4.00196e-05	yes	down	_
LE01Gene01732	1.58874	0.667882	2.44688e-06	4.03847e-05	yes	up	RecName: Full=3-phosphoinositide-dependent protein kinase 1; AltName: Full=Protein kinase B kinase; Short=PkB kinase
LE01Gene12864	0.492735	-1.02112	2.52914e-06	4.15549e-05	yes	down	RecName: Full=Exoglucanase; AltName: Full=1,4-beta-cellobiohydrolase; AltName: Full=Beta-glucancellobiohydrolase; AltName: Full=Exocellobiohydrolase; Flags: Precurso
LE01Gene04008	3.64044	1.86411	2.52926e-06	4.15549e-05	yes	up	RecName: Full=Laccase; AltName: Full=Benzenediol:oxygen oxidoreductase; AltName: Full=Diphenol oxidase; AltName: Full=Ligninolytic phenoloxidase; AltName: Full=Uris
LE01Gene06424	0.378915	-1.40006	2.55256e-06	4.18744e-05	yes	down	RecName: Full=LYR motif-containing protein 4
LE01Gene00201	0.559393	-0.838066	2.5909e-06	4.24392e-05	yes	down	RecName: Full=Probable splicing factor 3B subunit 5; Short=SF3b5; AltName: Full=Pre-mRNA-splicing factor SF3b 10 kDa subunit
LE01Gene11213	0.444614	-1.16937	2.69433e-06	4.40669e-05	yes	down	_
LE01Gene02618	0.604645	-0.725841	2.79377e-06	4.56246e-05	yes	down	RecName: Full=Abhydrolase domain-containing protein C22H12.03
LE01Gene13540	0.214464	-2.22119	2.82499e-06	4.60652e-05	yes	down	RecName: Full=Fruiting body protein SC3; AltName: Full=Hydrophobin SC3; Flags: Precursor
LE01Gene05526	1.68042	0.748823	2.89104e-06	4.70715e-05	yes	up	RecName: Full=Histone-lysine N-methyltransferase SUV39H1; AltName: Full=Suppressor of variegation 3-9 homolog 1; Short=Su(var)3-9 homolog 1
LE01Gene09667	2.79158	1.48108	2.9007e-06	4.71582e-05	yes	up	_
LE01Gene03683	1.67196	0.741542	3.01596e-06	4.89586e-05	yes	up	RecName: Full=Poly(A) RNA polymerase protein cid1; AltName: Full=Caffeine-induced death protein 1
LE01Gene06401	0.51448	-0.958814	3.03513e-06	4.91963e-05	yes	down	_
LE01Gene11680	1.66324	0.733996	3.17382e-06	5.13677e-05	yes	up	RecName: Full=Uncharacterized protein C115.02c
LE01Gene01745	0.51571	-0.955369	3.18352e-06	5.13837e-05	yes	down	_
LE01Gene10761	0.612878	-0.706328	3.20523e-06	5.16451e-05	yes	down	_
LE01Gene00179	2.41635	1.27283	3.29804e-06	5.30618e-05	yes	up	_
LE01Gene06555	7.37785	2.8832	3.31847e-06	5.33115e-05	yes	up	_
LE01Gene13415	0.544689	-0.876496	3.47759e-06	5.57029e-05	yes	down	_
LE01Gene02961	1.51857	0.602714	3.50775e-06	5.61033e-05	yes	up	_
LE01Gene03975	0.434754	-1.20173	3.56823e-06	5.69867e-05	yes	down	_
LE01Gene11814	1.91565	0.937836	3.6045e-06	5.74815e-05	yes	up	_
LE01Gene13695	0.554559	-0.850586	3.66942e-06	5.84309e-05	yes	down	RecName: Full=WD repeat-containing protein 82
LE01Gene01239	0.463022	-1.11085	3.71759e-06	5.91113e-05	yes	down	RecName: Full=Oligopeptide transporter 3; Short=AtOPT3
LE01Gene01546	2.75242	1.4607	3.74274e-06	5.94241e-05	yes	up	RecName: Full=Glutamine synthetase; Short=GS; AltName: Full=Glutamate--ammonia ligase
LE01Gene11920	1.72414	0.785875	3.80475e-06	6.02326e-05	yes	up	_
LE01Gene06557	3.67254	1.87678	3.8005e-06	6.02326e-05	yes	up	_
LE01Gene09308	1.90687	0.931209	3.84038e-06	6.05319e-05	yes	up	RecName: Full=Tripeptidyl-peptidase 1; Short=TPP-1; AltName: Full=Tripeptidyl aminopeptidase; AltName: Full=Tripeptidyl-peptidase I; Short=TPP-I; Flags: Precursor
LE01Gene11939	4.74571	2.24662	3.83389e-06	6.05319e-05	yes	up	_
LE01Gene04746	0.326983	-1.61271	3.87995e-06	6.1067e-05	yes	down	_
LE01Gene13702	1.94439	0.959318	3.89305e-06	6.11846e-05	yes	up	_
LE01Gene05946	0.477325	-1.06696	3.94736e-06	6.19484e-05	yes	down	RecName: Full=Aldehyde reductase Ahr; AltName: Full=Zinc-dependent alcohol dehydrogenase Ahr
LE01Gene11848	0.433494	-1.20592	4.00054e-06	6.25284e-05	yes	down	_
LE01Gene10238	1.58729	0.666566	4.00159e-06	6.25284e-05	yes	up	_
LE01Gene02855	4.24619	2.08617	4.04798e-06	6.30718e-05	yes	up	_
LE01Gene01881	1.78691	0.83747	4.06782e-06	6.32902e-05	yes	up	RecName: Full=Peroxisomal hydratase-dehydrogenase-epimerase; Short=HDE; AltName: Full=Multifunctional beta-oxidation protein; Short=MFP; Includes: RecName: Full=2-en
LE01Gene08562	1.58576	0.665178	4.08966e-06	6.35389e-05	yes	up	RecName: Full=Nonribosomal peptide synthetase 2; AltName: Full=Siderophore peptide synthase C
LE01Gene10114	3.81546	1.93186	4.22832e-06	6.55993e-05	yes	up	_
LE01Gene01542	0.578355	-0.789972	4.25983e-06	6.5994e-05	yes	down	RecName: Full=AP-1 complex subunit sigma-1; AltName: Full=Sigma1-adaptin; AltName: Full=Valproic acid-sensitive protein 2
LE01Gene05110	0.579739	-0.786524	4.31502e-06	6.66587e-05	yes	down	_
LE01Gene02487	0.662879	-0.593183	4.35709e-06	6.71177e-05	yes	down	_
LE01Gene03472	0.635883	-0.653167	4.36972e-06	6.72169e-05	yes	down	RecName: Full=Serine/threonine-protein kinase rio2
LE01Gene02372	7.94723	2.99045	4.39187e-06	6.74621e-05	yes	up	_
LE01Gene03666	1.98865	0.991789	4.40174e-06	6.75182e-05	yes	up	_
LE01Gene00058	2.81345	1.49234	4.42238e-06	6.77392e-05	yes	up	_
LE01Gene07885	0.561603	-0.832377	4.50192e-06	6.8667e-05	yes	down	RecName: Full=Protein BUD31 homolog; AltName: Full=Protein G10 homolog
LE01Gene09363	0.393648	-1.34502	4.60072e-06	6.99773e-05	yes	down	RecName: Full=Uncharacterized HIT-like protein MJ0866
LE01Gene05684	2.38227	1.25234	4.6329e-06	7.03682e-05	yes	up	_
LE01Gene14390	0.354766	-1.49506	4.65998e-06	7.06807e-05	yes	down	_
LE01Gene00762	0.491228	-1.02553	4.79487e-06	7.26252e-05	yes	down	_
LE01Gene09775	0.523466	-0.933832	4.82218e-06	7.29372e-05	yes	down	RecName: Full=Cysteine-rich PDZ-binding protein; AltName: Full=Cysteine-rich interactor of PDZ three; Short=Cysteine-rich interactor of PDZ3
LE01Gene03432	1.94305	0.958324	4.86309e-06	7.34536e-05	yes	up	_
LE01Gene03920	0.469449	-1.09096	4.95653e-06	7.45073e-05	yes	down	RecName: Full=Cytochrome c peroxidase, mitochondrial; Short=CCP; Flags: Precursor CCPR_CRYNJ RecName: Full=Cytochrome c peroxidase, mitoch
LE01Gene04884	0.484988	-1.04398	4.96029e-06	7.45073e-05	yes	down	_
LE01Gene03341	1.76151	0.816814	4.981e-06	7.4715e-05	yes	up	_
LE01Gene07812	0.665576	-0.587324	5.01823e-06	7.51696e-05	yes	down	RecName: Full=Monothiol glutaredoxin-5, mitochondrial; Flags: Precursor
LE01Gene13985	0.654151	-0.612305	5.26513e-06	7.87594e-05	yes	down	RecName: Full=Probable glucosamine 6-phosphate N-acetyltransferase 2; AltName: Full=Glucose-6-phosphate acetyltransferase 2; AltName: Full=Phosphoglucosamine acety
LE01Gene08962	0.634675	-0.655911	5.34519e-06	7.97373e-05	yes	down	RecName: Full=3-phytase A; AltName: Full=3 phytase A; AltName: Full=Myo-inositol hexakisphosphate phosphohydrolase A; AltName: Full=Myo-inositol-hexaphosphate 3-pho
LE01Gene06445	0.323897	-1.62639	5.34213e-06	7.97373e-05	yes	down	_
LE01Gene04878	0.483068	-1.0497	5.37768e-06	8.0112e-05	yes	down	RecName: Full=Cysteine synthase 2; Short=CSase 2; AltName: Full=O-acetylserine (thiol)-lyase 2; Short=OAS-TL 2; AltName: Full=O-acetylserine sulfhydrylase 2
LE01Gene07232	1.50043	0.58538	5.41559e-06	8.0456e-05	yes	up	_
LE01Gene13326	0.463432	-1.10957	5.40835e-06	8.0456e-05	yes	down	_
LE01Gene07580	1.7295	0.790353	5.4507e-06	8.0867e-05	yes	up	RecName: Full=Biotin--protein ligase; AltName: Full=Biotin apo-protein ligase; Includes: RecName: Full=Biotin--
LE01Gene11342	3.37474	1.75478	5.46721e-06	8.10012e-05	yes	up	_
LE01Gene07790	0.529221	-0.918059	5.52349e-06	8.17235e-05	yes	down	RecName: Full=ATP-dependent RNA helicase ded1; AltName: Full=DEAD box RNA helicase 9
LE01Gene06134	0.435941	-1.19779	5.56942e-06	8.22911e-05	yes	down	_
LE01Gene04529	0.629308	-0.668162	5.58731e-06	8.23314e-05	yes	down	RecName: Full=ATP-binding cassette sub-family B member 10, mitochondrial; AltName: Full=ATP-binding cassette transporter 10; Short=ABC transporter 10 protein; Alt
LE01Gene05179	2.4874	1.31464	5.58568e-06	8.23314e-05	yes	up	_
LE01Gene01509	3.71069	1.89169	5.73851e-06	8.44448e-05	yes	up	_
LE01Gene10721	1.69636	0.762441	5.79869e-06	8.52149e-05	yes	up	_
LE01Gene03334	1.57143	0.652075	5.81201e-06	8.52952e-05	yes	up	_
LE01Gene08952	41.0937	5.36084	5.87766e-06	8.61422e-05	yes	up	_
LE01Gene09859	1.82662	0.869178	5.97665e-06	8.7475e-05	yes	up	_
LE01Gene13634	14.8593	3.8933	6.0655e-06	8.8656e-05	yes	up	RecName: Full=WSC domain-containing protein 2
LE01Gene00697	1.53963	0.622586	6.1227e-06	8.92517e-05	yes	up	RecName: Full=Spindle pole body component alp14; AltName: Full=Altered polarity protein 14
LE01Gene05479	3.87564	1.95443	6.12047e-06	8.92517e-05	yes	up	_
LE01Gene01734	0.647697	-0.626609	6.14941e-06	8.95209e-05	yes	down	RecName: Full=Glycine-rich RNA-binding protein 3, mitochondrial; Short=AtGR-RBP3; AltName: Full=AtRBG3; AltName: Full=Mitochondrial RNA-binding protein 2a; Short=At
LE01Gene09225	0.581225	-0.782831	6.33095e-06	9.20403e-05	yes	down	_
LE01Gene05017	2.20116	1.13826	6.35245e-06	9.22294e-05	yes	up	_
LE01Gene00221	2.08447	1.05968	6.41332e-06	9.29888e-05	yes	up	RecName: Full=Uncharacterized RING finger protein P8B7.23
LE01Gene10909	4.32469	2.1126	6.43228e-06	9.31394e-05	yes	up	_
LE01Gene08771	1.74258	0.801227	6.47791e-06	9.36753e-05	yes	up	RecName: Full=E3 ubiquitin-protein ligase ubr11; AltName: Full=N-end-recognizing protein 11; Short=N-recognin-11
LE01Gene09746	0.59439	-0.750518	6.63225e-06	9.57796e-05	yes	down	_
LE01Gene04089	1.69133	0.758154	6.65665e-06	9.60043e-05	yes	up	RecName: Full=Probable 1,4-beta-D-glucan cellobiohydrolase B; AltName: Full=Beta-glucancellobiohydrolase B; AltName: Full=Exocellobiohydrolase B; AltName: Full=Exo
LE01Gene08380	166.118	7.37607	6.78215e-06	9.76846e-05	yes	up	_
LE01Gene07681	0.49216	-1.0228	6.84768e-06	9.84978e-05	yes	down	RecName: Full=Probable phosphoadenosine phosphosulfate reductase; AltName: Full=3'-phosphoadenylylsulfate reductase; AltName: Full=PAPS reductase, thioredoxin depen
LE01Gene01386	0.479757	-1.05962	6.87683e-06	9.87862e-05	yes	down	_
LE01Gene01414	2.15609	1.10842	7.05401e-06	0.000101198	yes	up	RecName: Full=Retrotransposon-like protein 1; AltName: Full=Mammalian retrotransposon derived protein 1; AltName: Full=Paternally expressed gene 11 protein; AltName
LE01Gene12205	1.57396	0.654401	7.06999e-06	0.000101293	yes	up	RecName: Full=Uncharacterized protein PB7E8.02
LE01Gene09058	0.598102	-0.741537	7.13974e-06	0.000102158	yes	down	RecName: Full=Stress response protein nst1
LE01Gene13982	0.528079	-0.921175	7.22327e-06	0.000103217	yes	down	RecName: Full=Flap endonuclease 1; Short=FEN-1; AltName: Full=Flap structure-specific endonuclease 1
LE01Gene11198	3.64312	1.86517	7.56859e-06	0.000107867	yes	up	_
LE01Gene04899	0.388641	-1.36349	7.78983e-06	0.000110875	yes	down	_
LE01Gene09417	6.09054	2.60657	7.83854e-06	0.000111422	yes	up	_
LE01Gene05412	0.532636	-0.908777	7.88935e-06	0.000111998	yes	down	_
LE01Gene09464	2.41519	1.27213	7.98164e-06	0.00011316	yes	up	RecName: Full=Bacitracin synthase 3; Short=BA3; Includes: RecName: Full=ATP-dependent isoleucine adenylase; Short=IleA; AltName: Full=Isoleucine activase; Includes:
LE01Gene06039	0.546097	-0.87277	8.15083e-06	0.000115258	yes	down	_
LE01Gene04150	0.492435	-1.022	8.32761e-06	0.000117452	yes	down	_
LE01Gene08336	0.342045	-1.54774	8.35938e-06	0.000117747	yes	down	_
LE01Gene07794	2.52275	1.335	8.45623e-06	0.000118803	yes	up	_
LE01Gene10953	0.561862	-0.831711	8.58966e-06	0.000120366	yes	down	_
LE01Gene09508	0.333014	-1.58635	8.69261e-06	0.000121652	yes	down	_
LE01Gene13417	1.70549	0.77019	8.82107e-06	0.000123055	yes	up	_
LE01Gene06478	0.396244	-1.33554	8.80754e-06	0.000123055	yes	down	RecName: Full=High-affinity glucose transporter
LE01Gene00252	0.510807	-0.96915	9.20624e-06	0.000128179	yes	down	_
LE01Gene05220	0.523835	-0.932815	9.22079e-06	0.000128217	yes	down	RecName: Full=NADH dehydrogenase
LE01Gene03156	0.56905	-0.813372	9.29438e-06	0.000128939	yes	down	RecName: Full=Ribose-phosphate pyrophosphokinase 2; AltName: Full=Phosphoribosyl pyrophosphate synthase 2
LE01Gene11788	1.53241	0.615802	9.6655e-06	0.000133887	yes	up	_
LE01Gene02261	0.400054	-1.32173	9.71791e-06	0.000134441	yes	down	RecName: Full=UDP-N-acetylglucosamine transferase subunit ALG14; AltName: Full=Asparagine-linked glycosylation protein 14 ALG14_CRYNJ Rec
LE01Gene05213	1.58454	0.664067	9.76564e-06	0.00013493	yes	up	RecName: Full=Stretch-activated cation channel MID1; AltName: Full=Mating pheromone-induced death protein 2; Flags: Precursor
LE01Gene02447	0.582973	-0.778499	9.80962e-06	0.000135365	yes	down	RecName: Full=Myosin regulatory light chain cdc4
LE01Gene13519	0.201805	-2.30897	9.86877e-06	0.000135836	yes	down	_
LE01Gene05947	0.342115	-1.54745	9.86854e-06	0.000135836	yes	down	_
LE01Gene02060	6.25001	2.64386	9.98227e-06	0.000137225	yes	up	_
LE01Gene06891	0.495443	-1.01321	1.009e-05	0.00013853	yes	down	_
LE01Gene08709	1.54997	0.632236	1.01137e-05	0.00013868	yes	up	_
LE01Gene05581	1.96235	0.972584	1.01303e-05	0.000138733	yes	up	_
LE01Gene10687	0.415888	-1.26573	1.01596e-05	0.000138959	yes	down	RecName: Full=GTP-binding protein TypA/BipA homolog
LE01Gene04867	0.555256	-0.848775	1.03089e-05	0.000140824	yes	down	_
LE01Gene11986	0.289064	-1.79054	1.03961e-05	0.000141836	yes	down	_
LE01Gene01047	1.56378	0.64504	1.05528e-05	0.000143794	yes	up	RecName: Full=Probable acyl-CoA dehydrogenase
LE01Gene13884	0.635563	-0.653892	1.06456e-05	0.000144876	yes	down	_
LE01Gene07423	2.1892	1.13041	1.09828e-05	0.000149277	yes	up	_
LE01Gene05937	3.19882	1.67754	1.10596e-05	0.00014976	yes	up	_
LE01Gene08178	0.430365	-1.21637	1.10575e-05	0.00014976	yes	down	RecName: Full=Inositol-3-phosphate synthase; AltName: Full=Myo-inositol 1-phosphate synthase; Short=IPS; Short=MI-1-P synthase; Short=MIP synthase
LE01Gene07117	3.18118	1.66956	1.11669e-05	0.000150857	yes	up	_
LE01Gene09349	10.0808	3.33353	1.11684e-05	0.000150857	yes	up	_
LE01Gene12307	0.550488	-0.861217	1.121e-05	0.00015123	yes	down	_
LE01Gene12973	2.93512	1.55342	1.13913e-05	0.000153486	yes	up	_
LE01Gene06255	2.82592	1.49872	1.16857e-05	0.000157257	yes	up	_
LE01Gene06406	0.549062	-0.86496	1.17464e-05	0.000157879	yes	down	RecName: Full=ADP,ATP carrier protein; AltName: Full=ADP/ATP translocase; AltName: Full=Adenine nucleotide translocator; Short=ANT
LE01Gene02279	2.01913	1.01374	1.18449e-05	0.000159005	yes	up	_
LE01Gene05186	11.8358	3.56508	1.19107e-05	0.000159692	yes	up	RecName: Full=Polyporopepsin; AltName: Full=Aspartic proteinase
LE01Gene02519	0.450418	-1.15066	1.19678e-05	0.00016026	yes	down	RecName: Full=Retinol dehydrogenase 12
LE01Gene11076	0.368444	-1.44048	1.20163e-05	0.000160711	yes	down	_
LE01Gene09739	0.592314	-0.755566	1.21921e-05	0.000162654	yes	down	RecName: Full=Uncharacterized RING finger protein P8B7.15c
LE01Gene13254	1.74046	0.799471	1.22065e-05	0.000162654	yes	up	RecName: Full=Serine/threonine-protein kinase HAL4/SAT4; AltName: Full=Halotolerance protein 4
LE01Gene07274	2.05228	1.03723	1.23328e-05	0.000163934	yes	up	_
LE01Gene05288	1.75915	0.814876	1.26222e-05	0.000167371	yes	up	RecName: Full=RNA polymerase II-associated protein 1
LE01Gene02836	3.35588	1.74669	1.26493e-05	0.000167527	yes	up	_
LE01Gene10576	7.29918	2.86773	1.29349e-05	0.0001711	yes	up	_
LE01Gene04031	0.477635	-1.06602	1.30578e-05	0.000172306	yes	down	RecName: Full=Putative serine/threonine-protein phosphatase C22H10.04
LE01Gene03569	1.90767	0.931808	1.30422e-05	0.000172306	yes	up	RecName: Full=Diphthamide biosynthesis protein 3
LE01Gene07230	0.543478	-0.879707	1.31623e-05	0.000173474	yes	down	RecName: Full=Probable cyclin-H
LE01Gene00748	0.590756	-0.759366	1.35983e-05	0.000178787	yes	down	RecName: Full=Glycolipid 2-alpha-mannosyltransferase; AltName: Full=Alpha-1,2-mannosyltransferase
LE01Gene02528	0.435174	-1.20033	1.37989e-05	0.000181204	yes	down	RecName: Full=CDP-diacylglycerol--serine O-phosphatidyltransferase; AltName: Full=Phosphatidylserine synthase
LE01Gene05071	1.77047	0.824135	1.39031e-05	0.000182132	yes	up	_
LE01Gene12762	2.56347	1.3581	1.39319e-05	0.00018229	yes	up	_
LE01Gene05323	2.25761	1.17479	1.40101e-05	0.000183092	yes	up	RecName: Full=Alpha-galactosidase 3; AltName: Full=Alpha-D-galactoside galactohydrolase 3; AltName: Full=Melibiase 3; Flags: Precursor
LE01Gene00421	1.56579	0.64689	1.42496e-05	0.000185999	yes	up	_
LE01Gene02952	0.570967	-0.808521	1.43519e-05	0.000187109	yes	down	_
LE01Gene06387	0.430694	-1.21527	1.44519e-05	0.000188186	yes	down	RecName: Full=Uncharacterized protein YAE1
LE01Gene01069	2.07143	1.05063	1.45352e-05	0.00018888	yes	up	_
LE01Gene13787	0.598846	-0.739743	1.45399e-05	0.00018888	yes	down	_
LE01Gene06974	1.72214	0.784201	1.46461e-05	0.000189805	yes	up	RecName: Full=MYND-type zinc finger protein C31F10.10c
LE01Gene01144	8.07184	3.0129	1.46315e-05	0.000189805	yes	up	_
LE01Gene13984	0.542809	-0.881485	1.47061e-05	0.000190355	yes	down	RecName: Full=Myrosinase 1; AltName: Full=Beta-glucosidase 1; AltName: Full=Beta-thioglucosidase 1; AltName: Full=Beta-thioglucosidase glucohydrolase 1; AltName: F
LE01Gene01503	2.6795	1.42196	1.48101e-05	0.000191474	yes	up	RecName: Full=Orotidine 5'-phosphate decarboxylase; AltName: Full=OMP decarboxylase; Short=OMPDCase; Short=OMPdecase; AltName: Full=Uridine 5'-monophosphate synthase;
LE01Gene10992	1.68014	0.748584	1.49454e-05	0.000192993	yes	up	_
LE01Gene07811	0.642433	-0.638383	1.51316e-05	0.000195165	yes	down	RecName: Full=DNL-type zinc finger protein; AltName: Full=Hsp70-escort protein 1; Short=HEP1; AltName: Full=mtHsp70-escort protein; Flags: Precursor
LE01Gene04237	2.35124	1.23342	1.52144e-05	0.000195769	yes	up	_
LE01Gene12238	1.71245	0.776064	1.54766e-05	0.000198907	yes	up	RecName: Full=NADPH-dependent aldehyde reductase ARI1
LE01Gene06237	1.72588	0.78733	1.55677e-05	0.00019984	yes	up	_
LE01Gene00627	1.84432	0.883089	1.57205e-05	0.000201564	yes	up	_
LE01Gene06721	0.374087	-1.41856	1.5752e-05	0.00020173	yes	down	_
LE01Gene05986	3.12296	1.64292	1.59794e-05	0.000204401	yes	up	_
LE01Gene11974	7.01118	2.80966	1.68258e-05	0.000214722	yes	up	_
LE01Gene08195	0.62525	-0.677496	1.6879e-05	0.000215148	yes	down	RecName: Full=Signal peptidase complex subunit 1; AltName: Full=Microsomal signal peptidase 12 kDa subunit; Short=SPase 12 kDa subunit
LE01Gene01030	1.5631	0.644413	1.72021e-05	0.000219009	yes	up	_
LE01Gene08008	7.69439	2.94381	1.73046e-05	0.000220056	yes	up	_
LE01Gene04030	0.296046	-1.75611	1.74833e-05	0.000222068	yes	down	_
LE01Gene07689	0.446012	-1.16485	1.75102e-05	0.000222151	yes	down	RecName: Full=DNA-directed RNA polymerase I subunit RPA2; AltName: Full=DNA-directed RNA polymerase I polypeptide 2; Short=RNA polymerase I subunit 2
LE01Gene06461	2.5692	1.36132	1.75494e-05	0.000222359	yes	up	_
LE01Gene06115	1.93228	0.950301	1.75676e-05	0.000222359	yes	up	_
LE01Gene11520	1.90931	0.933054	1.7619e-05	0.00022275	yes	up	_
LE01Gene01932	1.50892	0.593521	1.76591e-05	0.000222998	yes	up	RecName: Full=G1/S-specific cyclin pas1
LE01Gene08046	0.460409	-1.11901	1.77111e-05	0.000223136	yes	down	RecName: Full=Chaperone protein DnaJ
LE01Gene04868	2.05091	1.03626	1.76999e-05	0.000223136	yes	up	_
LE01Gene03470	0.661012	-0.597252	1.82147e-05	0.000228684	yes	down	RecName: Full=Cell wall alpha-1,3-glucan synthase mok13
LE01Gene10873	0.572025	-0.80585	1.82879e-05	0.000229338	yes	down	RecName: Full=Magnesium-dependent phosphatase 1; Short=MDP-1
LE01Gene01391	0.405696	-1.30153	1.84466e-05	0.000231061	yes	down	_
LE01Gene01872	0.534003	-0.905082	1.85493e-05	0.00023208	yes	down	RecName: Full=Mitochondrial import inner membrane translocase subunit tim17; AltName: Full=Mitochondrial protein import protein 2
LE01Gene14011	0.455127	-1.13566	1.86042e-05	0.000232499	yes	down	_
LE01Gene06725	0.451478	-1.14727	1.86289e-05	0.00023254	yes	down	_
LE01Gene01253	1.57204	0.652637	1.86573e-05	0.000232627	yes	up	RecName: Full=Probable metabolite transport protein CsbC
LE01Gene10744	0.446949	-1.16182	1.87135e-05	0.00023306	yes	down	_
LE01Gene03940	2.48862	1.31535	1.90223e-05	0.000236364	yes	up	RecName: Full=Phosphopantothenoylcysteine decarboxylase subunit VHS3; AltName: Full=Viable in a HAL3 SIT4 background protein 3
LE01Gene03647	0.625132	-0.677768	1.90531e-05	0.000236476	yes	down	RecName: Full=DNA repair protein RAD5
LE01Gene12579	2.54996	1.35048	1.93802e-05	0.000239803	yes	up	RecName: Full=Probable quinate permease; AltName: Full=Quinate transporter
LE01Gene04136	0.470189	-1.08869	1.93874e-05	0.000239803	yes	down	RecName: Full=Uncharacterized MFS-type transporter C1271.10c
LE01Gene04829	1.85599	0.892193	1.94926e-05	0.000240658	yes	up	RecName: Full=Exoglucanase 1; AltName: Full=1,4-beta-cellobiohydrolase; AltName: Full=Exocellobiohydrolase I; AltName: Full=Exoglucanase I; Flags: Precursor
LE01Gene04148	2.84549	1.50868	1.9523e-05	0.000240658	yes	up	_
LE01Gene11282	1.95615	0.968018	1.95129e-05	0.000240658	yes	up	_
LE01Gene11104	3.57213	1.83679	1.9721e-05	0.000242548	yes	up	_
LE01Gene05876	0.539769	-0.889586	1.97023e-05	0.000242548	yes	down	RecName: Full=Uncharacterized transporter C22F8.04
LE01Gene09520	0.441717	-1.1788	1.97844e-05	0.000243052	yes	down	_
LE01Gene04167	1.83548	0.876155	2.01172e-05	0.000246862	yes	up	RecName: Full=Multifunctional tryptophan biosynthesis protein; Includes: RecName: Full=Anthranilate synthase component 2; Short=AS; AltName: Full=Anthranilate synthas
LE01Gene00359	0.527995	-0.921405	2.05005e-05	0.000250998	yes	down	_
LE01Gene01376	0.407077	-1.29663	2.0794e-05	0.000254305	yes	down	_
LE01Gene06325	0.471286	-1.08533	2.10191e-05	0.000256532	yes	down	RecName: Full=Heat-stable 19 kDa antigen; AltName: Full=CS-AG; Flags: Precursor
LE01Gene11637	3.19499	1.67581	2.10234e-05	0.000256532	yes	up	_
LE01Gene06154	0.528186	-0.920883	2.13465e-05	0.000259891	yes	down	RecName: Full=Protein ZINC INDUCED FACILITATOR-LIKE 1; AltName: Full=Protein ZIF-LIKE 1
LE01Gene07507	0.440307	-1.18342	2.15836e-05	0.000262279	yes	down	_
LE01Gene12122	1.65608	0.727769	2.1591e-05	0.000262279	yes	up	_
LE01Gene07980	0.563509	-0.82749	2.16335e-05	0.000262503	yes	down	RecName: Full=Type-1 glutamine synthetase 2; Short=Type-1 GS 2; AltName: Full=Type-1 glutamate--ammonia ligase 2
LE01Gene13889	0.561312	-0.833124	2.18312e-05	0.000264605	yes	down	_
LE01Gene06869	0.481648	-1.05395	2.25224e-05	0.000272073	yes	down	_
LE01Gene05498	1.5964	0.674818	2.29914e-05	0.00027743	yes	up	RecName: Full=Hsp70/Hsp90 co-chaperone CNS1; AltName: Full=Cyclophilin seven suppressor 1; AltName: Full=STI1 stress-inducible protein homolog
LE01Gene09181	0.304915	-1.71352	2.31456e-05	0.000278981	yes	down	_
LE01Gene11655	2.37183	1.246	2.33054e-05	0.000280595	yes	up	_
LE01Gene05484	0.612686	-0.706781	2.34092e-05	0.000281533	yes	down	_
LE01Gene04324	0.464361	-1.10668	2.34747e-05	0.000282009	yes	down	_
LE01Gene06306	0.620664	-0.688117	2.36237e-05	0.000283485	yes	down	RecName: Full=Activating signal cointegrator 1 complex subunit 3
LE01Gene00384	1.8513	0.888542	2.39422e-05	0.000286673	yes	up	_
LE01Gene00292	0.634768	-0.655699	2.43269e-05	0.000290958	yes	down	_
LE01Gene09669	0.615817	-0.699427	2.47525e-05	0.000295723	yes	down	_
LE01Gene14566	5.86197	2.55139	2.50814e-05	0.000298994	yes	up	RecName: Full=Probable RNA-directed DNA polymerase from transposon X-element; AltName: Full=Reverse transcriptase
LE01Gene08580	1.64452	0.717669	2.52679e-05	0.000300887	yes	up	_
LE01Gene04019	0.63758	-0.649322	2.54722e-05	0.000302988	yes	down	RecName: Full=Uncharacterized protein C4D7.04c
LE01Gene02123	0.590062	-0.761061	2.57001e-05	0.000305364	yes	down	_
LE01Gene04900	0.181257	-2.46389	2.591e-05	0.000307522	yes	down	_
LE01Gene05303	0.0581361	-4.10442	2.60562e-05	0.00030892	yes	down	_
LE01Gene09755	0.615275	-0.700697	2.62542e-05	0.000310928	yes	down	RecName: Full=Uncharacterized J domain-containing protein C17A3.05c
LE01Gene13266	3.3495	1.74395	2.63762e-05	0.000312033	yes	up	RecName: Full=Lipase 2; Flags: Precursor
LE01Gene12542	1.78889	0.839067	2.64215e-05	0.000312228	yes	up	_
LE01Gene04007	1.79699	0.845581	2.64605e-05	0.000312349	yes	up	RecName: Full=Bax inhibitor 1; AltName: Full=BH3 domain-containing protein bxi1
LE01Gene00722	0.611716	-0.709067	2.66925e-05	0.000314745	yes	down	RecName: Full=Protein phosphatase PTC7 homolog fig; AltName: Full=Fos intronic gene protein
LE01Gene11079	5.36991	2.4249	2.6795e-05	0.000315611	yes	up	_
LE01Gene03382	0.652584	-0.615765	2.73148e-05	0.000321037	yes	down	RecName: Full=Probable vacuolar amino acid transporter YPQ1; AltName: Full=PQ-loop repeat-containing protein 1
LE01Gene07900	2.50894	1.32708	2.73142e-05	0.000321037	yes	up	_
LE01Gene08080	1.72441	0.786103	2.7365e-05	0.00032128	yes	up	RecName: Full=ATP-binding cassette sub-family D member 1; AltName: Full=Adrenoleukodystrophy protein; Short=ALDP
LE01Gene08403	3.0584	1.61278	2.74089e-05	0.000321448	yes	up	_
LE01Gene08223	3.61906	1.85561	2.8048e-05	0.000328234	yes	up	_
LE01Gene08230	0.455909	-1.13318	2.81939e-05	0.000329586	yes	down	RecName: Full=Ribosomal RNA-processing protein 8
LE01Gene05245	0.605421	-0.723989	2.82306e-05	0.00032966	yes	down	RecName: Full=Gamma-glutamyltranspeptidase 2; AltName: Full=Gamma-glutamyltransferase 2; AltName: Full=Glutathione hydrolase 2; Contains: RecName: Full=Gamma-glutam
LE01Gene02558	0.211697	-2.23993	2.87075e-05	0.000334869	yes	down	_
LE01Gene12440	0.662139	-0.594793	2.90554e-05	0.000338377	yes	down	RecName: Full=Alcohol dehydrogenase; Short=ADH
LE01Gene03117	0.606931	-0.720397	2.94652e-05	0.000342604	yes	down	_
LE01Gene03646	0.375566	-1.41286	2.96291e-05	0.000344142	yes	down	_
LE01Gene11336	2.27955	1.18875	2.96782e-05	0.000344344	yes	up	_
LE01Gene12978	0.629215	-0.668374	2.99365e-05	0.0003466	yes	down	_
LE01Gene09366	1.72161	0.783762	3.0349e-05	0.000350628	yes	up	_
LE01Gene11894	1.91864	0.940083	3.03951e-05	0.000350787	yes	up	RecName: Full=Phosphatidylserine decarboxylase proenzyme 3; Contains: RecName: Full=Phosphatidylserine decarboxylase 3 beta chain; Contains: RecName: Full=Phosphat
LE01Gene05883	1.75357	0.810292	3.09764e-05	0.000357117	yes	up	_
LE01Gene05691	0.263621	-1.92347	3.11732e-05	0.000359004	yes	down	_
LE01Gene10919	2.24036	1.16373	3.1545e-05	0.000362517	yes	up	_
LE01Gene07772	7.36865	2.8814	3.17713e-05	0.000364732	yes	up	_
LE01Gene09519	0.610613	-0.711671	3.20136e-05	0.000367125	yes	down	RecName: Full=Opioid growth factor receptor-like protein 1
LE01Gene14762	3.15338	1.6569	3.23263e-05	0.000370321	yes	up	_
LE01Gene12472	2.18948	1.13059	3.23881e-05	0.000370637	yes	up	_
LE01Gene00603	1.62502	0.700454	3.28964e-05	0.000376058	yes	up	RecName: Full=Asparagine synthetase
LE01Gene02486	1.7816	0.833176	3.33877e-05	0.000381273	yes	up	_
LE01Gene10237	0.586124	-0.770721	3.41253e-05	0.000388878	yes	down	RecName: Full=Thioredoxin reductase
LE01Gene01958	2.1141	1.08005	3.42516e-05	0.000389908	yes	up	RecName: Full=Transcription activator of gluconeogenesis ERT1
LE01Gene08419	0.408249	-1.29248	3.47193e-05	0.000393993	yes	down	RecName: Full=Mitochondrial import inner membrane translocase subunit tim44; Flags: Precursor
LE01Gene10675	0.456165	-1.13237	3.50337e-05	0.000397146	yes	down	_
LE01Gene03080	1.69471	0.761042	3.50889e-05	0.000397357	yes	up	_
LE01Gene04053	2.1387	1.09673	3.52311e-05	0.000398137	yes	up	RecName: Full=Uncharacterized histidine-rich protein DDB_G0274557; Flags: Precursor
LE01Gene03524	1.83918	0.879064	3.58223e-05	0.000404397	yes	up	RecName: Full=Sulfite reductase
LE01Gene07284	0.554033	-0.851956	3.70287e-05	0.000417374	yes	down	RecName: Full=Ino eighty subunit 1
LE01Gene03885	0.393464	-1.3457	3.70487e-05	0.000417374	yes	down	RecName: Full=rRNA-processing protein FCF1 homolog
LE01Gene02138	1.73319	0.793434	3.72427e-05	0.000419125	yes	up	RecName: Full=Rho GTPase-activating protein 17; AltName: Full=Neuron-associated developmentally-regulated protein; Short=Nadrin; AltName: Full=Rho-type GTPase-activa
LE01Gene03122	0.471598	-1.08437	3.76283e-05	0.000422589	yes	down	RecName: Full=Pre-rRNA-processing protein ESF1; AltName: Full=18S rRNA factor 1
LE01Gene08884	4.04873	2.01747	3.7671e-05	0.000422631	yes	up	_
LE01Gene03280	1.53134	0.614791	3.78152e-05	0.000423812	yes	up	_
LE01Gene04255	0.471285	-1.08533	3.79896e-05	0.000425327	yes	down	RecName: Full=Sterol 24-C-methyltransferase erg6; AltName: Full=Delta(24)-sterol C-methyltransferase erg6; AltName: Full=Ergosterol biosynthesis protein 6
LE01Gene02037	0.302295	-1.72597	3.80675e-05	0.00042576	yes	down	RecName: Full=Peptidyl-prolyl cis-trans isomerase; Short=PPIase; AltName: Full=Cyclophilin; Short=CPH; AltName: Full=Cyclosporin A-binding protein; AltName: Full=Rota
LE01Gene10879	0.562394	-0.830347	3.84233e-05	0.000429297	yes	down	RecName: Full=Aromatic peroxygenase
LE01Gene04000	0.510452	-0.970154	3.90698e-05	0.000435625	yes	down	_
LE01Gene13974	2.69596	1.4308	3.95093e-05	0.000439622	yes	up	_
LE01Gene08389	0.426018	-1.23101	3.94776e-05	0.000439622	yes	down	RecName: Full=Quinate permease; AltName: Full=Quinate transporter
LE01Gene08699	0.324852	-1.62215	3.9642e-05	0.000440647	yes	down	_
LE01Gene08024	0.650026	-0.621432	3.97483e-05	0.000441376	yes	down	_
LE01Gene05850	0.59101	-0.758746	3.9822e-05	0.000441744	yes	down	_
LE01Gene02991	0.651389	-0.618409	4.00196e-05	0.000443482	yes	down	RecName: Full=TPR repeat protein oca3; AltName: Full=Overexpression-mediated cell cycle arrest protein 3
LE01Gene08491	1.94428	0.959238	4.10556e-05	0.000454499	yes	up	_
LE01Gene09502	3.17868	1.66843	4.13512e-05	0.000457306	yes	up	_
LE01Gene11524	1.80587	0.852696	4.15426e-05	0.000458955	yes	up	RecName: Full=NAD-dependent protein deacetylase hst2-1; AltName: Full=Homologous to SIR2 protein 2-1; AltName: Full=Regulatory protein SIR2 homolog 2-1
LE01Gene00156	0.61663	-0.697523	4.19459e-05	0.000462469	yes	down	RecName: Full=COP9 signalosome complex subunit 2; Short=SGN2; Short=Signalosome subunit 2; AltName: Full=Alien homolog; AltName: Full=JAB1-containing signalosome subu
LE01Gene11819	1.54897	0.631312	4.22976e-05	0.000465662	yes	up	_
LE01Gene07930	0.629712	-0.667236	4.30502e-05	0.000473203	yes	down	_
LE01Gene09790	1.80128	0.84902	4.49089e-05	0.00049214	yes	up	RecName: Full=Phosphoglucomutase; Short=PGM; AltName: Full=Glucose phosphomutase
LE01Gene10123	0.550515	-0.861145	4.50037e-05	0.000492681	yes	down	RecName: Full=DnaJ homolog subfamily A member 2; AltName: Full=Cell cycle progression restoration gene 3 protein; AltName: Full=Dnj3; Short=Dj3; AltName: Full=HIRA
LE01Gene10514	0.63133	-0.663534	4.54691e-05	0.000497276	yes	down	_
LE01Gene05159	0.529382	-0.917619	4.66173e-05	0.000508808	yes	down	RecName: Full=Uncharacterized protein C22E12.03c
LE01Gene11277	1.62089	0.696786	4.65875e-05	0.000508808	yes	up	_
LE01Gene10887	0.556234	-0.846236	4.714e-05	0.000513481	yes	down	RecName: Full=Alkyltransferase-like protein 1
LE01Gene04875	3.1379	1.6498	4.7395e-05	0.000515225	yes	up	RecName: Full=Arginine biosynthesis bifunctional protein ArgJ, mitochondrial; Includes: RecName: Full=Glutamate N-acetyltransferase; Short=GAT; AltName: Full=Ornit
LE01Gene12237	0.656241	-0.607703	4.80942e-05	0.000522303	yes	down	_
LE01Gene07166	0.505199	-0.985076	4.83162e-05	0.00052419	yes	down	RecName: Full=INO80 complex subunit 2
LE01Gene01935	0.554627	-0.85041	4.86367e-05	0.00052714	yes	down	RecName: Full=U2 snRNP-associated SURP motif-containing protein; AltName: Full=140 kDa Ser/Arg-rich domain protein; AltName: Full=U2-associated protein SR140
LE01Gene01126	0.465053	-1.10453	4.89122e-05	0.000529598	yes	down	RecName: Full=CRAL-TRIO domain-containing protein C23B6.04c
LE01Gene07643	0.580198	-0.785383	4.97553e-05	0.000537655	yes	down	RecName: Full=RNA-binding motif protein, X-linked 2
LE01Gene06317	0.504589	-0.986819	5.02338e-05	0.000542286	yes	down	RecName: Full=3-ketoacyl-CoA thiolase, peroxisomal; AltName: Full=Acetyl-CoA acyltransferase; AltName: Full=Beta-ketothiolase; AltName: Full=Peroxisomal 3-oxoacyl-CoA
LE01Gene06868	1.61952	0.69557	5.09851e-05	0.000549849	yes	up	_
LE01Gene14223	6.13545	2.61717	5.14183e-05	0.000553422	yes	up	RecName: Full=AB hydrolase superfamily protein C1039.03
LE01Gene12361	2.19741	1.13581	5.1747e-05	0.000555309	yes	up	_
LE01Gene01582	0.626853	-0.673802	5.17265e-05	0.000555309	yes	down	RecName: Full=Beta-catenin-like protein 1; AltName: Full=Nuclear-associated protein; Short=NAP
LE01Gene07112	2.87297	1.52254	5.22466e-05	0.000560117	yes	up	RecName: Full=Sorbose reductase sou1; AltName: Full=Sorbitol utilization protein sou1
LE01Gene08344	2.05158	1.03674	5.24563e-05	0.00056181	yes	up	_
LE01Gene01799	2.66019	1.41153	5.28189e-05	0.00056458	yes	up	RecName: Full=Bleomycin hydrolase; Short=BH; Short=BLM hydrolase; Short=BMH
LE01Gene06508	2.09679	1.06818	5.44246e-05	0.000580709	yes	up	RecName: Full=Uncharacterized protein YLR460C
LE01Gene00640	0.406115	-1.30004	5.44348e-05	0.000580709	yes	down	RecName: Full=DNA polymerase V; Short=POL V
LE01Gene01055	0.639054	-0.645989	5.48187e-05	0.000584231	yes	down	RecName: Full=Alpha-amylase; AltName: Full=1,4-alpha-D-glucan glucanohydrolase; Flags: Precursor
LE01Gene10664	3.44692	1.78531	5.49947e-05	0.000585532	yes	up	_
LE01Gene14463	2.92145	1.54669	5.51258e-05	0.000586352	yes	up	_
LE01Gene06121	0.605405	-0.724026	5.58284e-05	0.000592665	yes	down	RecName: Full=Pdp3-interacting factor 1
LE01Gene13329	0.660509	-0.598349	5.60041e-05	0.00059395	yes	down	RecName: Full=Clathrin light chain; Short=CLC
LE01Gene08228	0.589152	-0.763288	5.64879e-05	0.000598123	yes	down	RecName: Full=Sulfite reductase
LE01Gene13261	12.6505	3.66112	5.65077e-05	0.000598123	yes	up	_
LE01Gene09126	0.577199	-0.79286	5.79008e-05	0.000612271	yes	down	RecName: Full=RutC family protein PH0854
LE01Gene07236	1.52058	0.604619	5.86907e-05	0.000618216	yes	up	_
LE01Gene10929	2.52965	1.33894	5.90832e-05	0.000621748	yes	up	_
LE01Gene13002	0.55226	-0.856581	6.01177e-05	0.00063141	yes	down	RecName: Full=Guanine nucleotide-binding protein-like 3 homolog
LE01Gene00223	2.02638	1.0189	6.04479e-05	0.000634014	yes	up	_
LE01Gene05569	0.253059	-1.98245	6.05981e-05	0.000634615	yes	down	_
LE01Gene00590	2.59651	1.37657	6.08365e-05	0.000636257	yes	up	_
LE01Gene03412	4.70742	2.23494	6.10527e-05	0.000637531	yes	up	_
LE01Gene06563	0.455884	-1.13326	6.1577e-05	0.000641772	yes	down	_
LE01Gene03119	1.79614	0.844899	6.17762e-05	0.000643231	yes	up	_
LE01Gene00570	0.641347	-0.640822	6.20007e-05	0.00064495	yes	down	_
LE01Gene05860	0.621912	-0.685218	6.36124e-05	0.000661082	yes	down	RecName: Full=Uncharacterized transcriptional regulatory protein C1F7.11c
LE01Gene09512	0.569934	-0.811133	6.39701e-05	0.000663034	yes	down	_
LE01Gene11654	1.80807	0.85445	6.39834e-05	0.000663034	yes	up	_
LE01Gene07809	2.28721	1.19359	6.40455e-05	0.000663044	yes	up	RecName: Full=3-hydroxyacyl-CoA dehydrogenase type-2; AltName: Full=17-beta-hydroxysteroid dehydrogenase 10; Short=17-beta-HSD 10; AltName: Full=3-hydroxy-2-methylbu
LE01Gene05099	1.61154	0.68844	6.48087e-05	0.000669669	yes	up	_
LE01Gene07960	2.07046	1.04995	6.49995e-05	0.000671002	yes	up	RecName: Full=Phosphopantetheine adenylyltransferase; Short=PPAT; AltName: Full=Coenzyme A biosynthesis protein 4; AltName: Full=Dephospho-CoA pyrophosphorylase; Alt
LE01Gene01615	1.67666	0.745586	6.52307e-05	0.000672749	yes	up	RecName: Full=5'-AMP-activated protein kinase subunit beta-1; Short=AMPK subunit beta-1; Short=AMPKb
LE01Gene06378	0.512809	-0.963508	6.55415e-05	0.000675314	yes	down	RecName: Full=Uncharacterized mitochondrial carrier C8C9.12c
LE01Gene12448	3.36281	1.74967	6.59752e-05	0.000678495	yes	up	RecName: Full=Oxygen-dependent choline dehydrogenase; Short=CDH; Short=CHD; AltName: Full=Betaine aldehyde dehydrogenase; Short=BADH
LE01Gene09138	2.65361	1.40796	6.62926e-05	0.00067967	yes	up	_
LE01Gene06318	1.68896	0.756135	6.62688e-05	0.00067967	yes	up	RecName: Full=Bifunctional P-450:NADPH-P450 reductase; AltName: Full=Cytochrome P450foxy; AltName: Full=Fatty acid omega-hydroxylase; Includes: RecName: Full=Cytoch
LE01Gene08781	0.598406	-0.740803	6.63398e-05	0.00067967	yes	down	_
LE01Gene12151	2.13872	1.09675	6.71069e-05	0.000685589	yes	up	RecName: Full=Glucoamylase; AltName: Full=1,4-alpha-D-glucan glucohydrolase; AltName: Full=Glucan 1,4-alpha-glucosidase; Flags: Precursor
LE01Gene06290	2.47685	1.30851	6.75733e-05	0.000689705	yes	up	_
LE01Gene03283	0.387672	-1.36709	6.78122e-05	0.000691494	yes	down	_
LE01Gene13398	2.465	1.30159	6.82169e-05	0.000694968	yes	up	_
LE01Gene10954	0.586362	-0.770138	6.97605e-05	0.000709363	yes	down	RecName: Full=Vesicle transport protein GOT1B; AltName: Full=Golgi transport 1 homolog B
LE01Gene09437	2.25981	1.1762	6.99948e-05	0.000711079	yes	up	RecName: Full=Probable transporter MCH4
LE01Gene11014	1.92573	0.945409	7.06618e-05	0.000717184	yes	up	_
LE01Gene12582	0.405348	-1.30277	7.18174e-05	0.000727558	yes	down	_
LE01Gene09779	0.569199	-0.812994	7.18178e-05	0.000727558	yes	down	_
LE01Gene10670	0.2148	-2.21894	7.22937e-05	0.000730628	yes	down	_
LE01Gene04819	2.186	1.12829	7.23227e-05	0.000730628	yes	up	RecName: Full=Sexual differentiation process protein isp4
LE01Gene09724	0.389105	-1.36177	7.29082e-05	0.000735174	yes	down	_
LE01Gene08826	1.51668	0.600915	7.34396e-05	0.000739161	yes	up	RecName: Full=Nuclear transport factor 2; Short=NTF-2
LE01Gene10048	0.453736	-1.14008	7.39941e-05	0.000744052	yes	down	RecName: Full=Pre-mRNA-splicing factor srp2
LE01Gene01359	1.76373	0.818632	7.42098e-05	0.00074553	yes	up	_
LE01Gene06223	0.567782	-0.816592	7.49239e-05	0.000751315	yes	down	RecName: Full=U3 small nucleolar RNA-associated protein 18 homolog
LE01Gene14678	2.01395	1.01003	7.50407e-05	0.000751792	yes	up	_
LE01Gene03067	0.644702	-0.633295	7.52641e-05	0.000753335	yes	down	RecName: Full=Cell division control protein 3
LE01Gene01599	4.79082	2.26027	7.537e-05	0.000753473	yes	up	_
LE01Gene03469	0.631782	-0.662501	7.54167e-05	0.000753473	yes	down	_
LE01Gene05130	0.447943	-1.15861	7.62498e-05	0.000760397	yes	down	RecName: Full=Myocyte-specific enhancer factor 2C
LE01Gene07151	0.656386	-0.607383	7.66569e-05	0.000763756	yes	down	_
LE01Gene09005	0.181811	-2.45949	7.73705e-05	0.000770159	yes	down	_
LE01Gene01236	1.99756	0.998237	7.90465e-05	0.000785616	yes	up	_
LE01Gene05589	0.653761	-0.613165	7.9068e-05	0.000785616	yes	down	_
LE01Gene08373	1.98881	0.991903	7.98629e-05	0.000792789	yes	up	_
LE01Gene02059	2.04646	1.03313	8.01188e-05	0.000794603	yes	up	RecName: Full=AB hydrolase superfamily protein C4A8.06c
LE01Gene03924	0.454206	-1.13858	8.06261e-05	0.000798905	yes	down	RecName: Full=UPF0743 protein YCR087C-A
LE01Gene05100	1.74356	0.802039	8.10566e-05	0.000802438	yes	up	RecName: Full=Probable oxidoreductase AIM17; AltName: Full=Altered inheritance of mitochondria protein 17, mitochondrial; AltName: Full=Found in mitochondrial proteo
LE01Gene00236	2.18197	1.12563	8.11815e-05	0.000802943	yes	up	_
LE01Gene02331	2.75155	1.46024	8.1558e-05	0.000805199	yes	up	_
LE01Gene01553	0.54083	-0.886753	8.18774e-05	0.000807503	yes	down	RecName: Full=Pyruvate dehydrogenase E1 component subunit beta-1, mitochondrial; Short=PDHE1-B; Flags: Precursor
LE01Gene04294	2.12264	1.08586	8.194e-05	0.000807503	yes	up	_
LE01Gene07783	1.73227	0.792667	8.31426e-05	0.000818612	yes	up	_
LE01Gene11457	0.636257	-0.652319	8.39376e-05	0.000825691	yes	down	_
LE01Gene07662	1.62698	0.702193	8.42411e-05	0.000827178	yes	up	_
LE01Gene00088	3.14398	1.65259	8.45081e-05	0.000829049	yes	up	_
LE01Gene00147	0.440472	-1.18288	8.48187e-05	0.000830597	yes	down	RecName: Full=50S ribosomal protein L1
LE01Gene02291	0.527217	-0.92353	8.59091e-05	0.000840516	yes	down	_
LE01Gene08704	1.7382	0.797592	8.65668e-05	0.000846189	yes	up	RecName: Full=Alcohol dehydrogenase
LE01Gene09743	0.470937	-1.08639	8.67751e-05	0.000846701	yes	down	RecName: Full=Delta(24(24(1)))-sterol reductase; AltName: Full=C-24(28) sterol reductase; AltName: Full=Sterol Delta(24(28))-reductase
LE01Gene08452	2.77369	1.4718	8.67279e-05	0.000846701	yes	up	_
LE01Gene05244	0.344366	-1.53799	8.77171e-05	0.000854357	yes	down	RecName: Full=Gamma-glutamyltranspeptidase 1; AltName: Full=Gamma-glutamyltransferase 1; AltName: Full=Glutathione hydrolase 1; Flags: Precursor
LE01Gene07252	2.02618	1.01876	8.77145e-05	0.000854357	yes	up	_
LE01Gene13414	0.587274	-0.767894	8.81034e-05	0.00085735	yes	down	RecName: Full=ADIPOR-like receptor IZH2; AltName: Full=Phosphate metabolism protein 36
LE01Gene05856	1.75805	0.81398	8.82925e-05	0.000858422	yes	up	RecName: Full=Serine/threonine-protein kinase ppk19
LE01Gene00908	0.472321	-1.08216	8.93773e-05	0.000868191	yes	down	RecName: Full=Mitochondrial chaperone BCS1
LE01Gene13669	3.37253	1.75383	8.9599e-05	0.000869567	yes	up	_
LE01Gene02773	1.9145	0.93697	9.02946e-05	0.000875124	yes	up	_
LE01Gene08856	0.418119	-1.25802	9.03328e-05	0.000875124	yes	down	_
LE01Gene14397	0.579339	-0.78752	9.24776e-05	0.000894307	yes	down	RecName: Full=Probable peptide/nitrate transporter At3g43790; AltName: Full=Protein ZINC INDUCED FACILITATOR-LIKE 2
LE01Gene10932	3.85078	1.94515	9.25612e-05	0.000894319	yes	up	RecName: Full=MORN repeat-containing protein 1
LE01Gene05178	2.96469	1.56788	9.32525e-05	0.000897803	yes	up	RecName: Full=Polyporopepsin; AltName: Full=Aspartic proteinase
LE01Gene05033	2.51416	1.33008	9.32169e-05	0.000897803	yes	up	RecName: Full=Plasma membrane iron permease
LE01Gene07763	0.571252	-0.8078	9.3142e-05	0.000897803	yes	down	RecName: Full=Zinc finger protein bud20
LE01Gene09763	1.8953	0.922428	9.307e-05	0.000897803	yes	up	_
LE01Gene14623	4.6176	2.20714	9.49255e-05	0.000911486	yes	up	_
LE01Gene12421	0.435542	-1.19912	9.6146e-05	0.000922391	yes	down	RecName: Full=O-methylsterigmatocystin oxidoreductase; Short=OMST oxidoreductase; AltName: Full=Aflatoxin B synthase; AltName: Full=Aflatoxin biosynthesis protein
LE01Gene04973	2.9882	1.57928	9.63041e-05	0.000923091	yes	up	RecName: Full=Siderophore biosynthesis regulatory protein URBS1
LE01Gene01674	1.70589	0.770525	9.78487e-05	0.000936244	yes	up	RecName: Full=Aromatic amino acid aminotransferase C56E4.03
LE01Gene05949	1.92885	0.947738	9.87155e-05	0.000942877	yes	up	_
LE01Gene02433	0.507185	-0.979416	9.88708e-05	0.00094353	yes	down	RecName: Full=Probable transcriptional regulatory protein SUN_1622
LE01Gene04714	2.77724	1.47365	9.90595e-05	0.000944501	yes	up	_
LE01Gene02539	1.79629	0.845021	0.000100153	0.000950258	yes	up	RecName: Full=Kynureninase; AltName: Full=Biosynthesis of nicotinic acid protein 5; AltName: Full=L-kynurenine hydrolase
LE01Gene07158	0.632998	-0.659727	0.000100124	0.000950258	yes	down	_
LE01Gene09759	0.572796	-0.803906	0.000100188	0.000950258	yes	down	RecName: Full=F-box protein pof7
LE01Gene00304	0.512542	-0.964257	9.99004e-05	0.000950258	yes	down	_
LE01Gene00351	0.47753	-1.06634	9.99616e-05	0.000950258	yes	down	RecName: Full=Ribosomal RNA processing protein 1 homolog B; AltName: Full=RRP1-like protein B
LE01Gene07405	7.03281	2.8141	0.000100405	0.000951479	yes	up	_
LE01Gene04351	0.476094	-1.07068	0.000100735	0.000952485	yes	down	RecName: Full=RNA exonuclease 4 REXO4_CRYNJ RecName: Full=RNA exonuclease 4
LE01Gene02423	0.635409	-0.654244	0.000100638	0.000952485	yes	down	_
LE01Gene04879	0.604018	-0.727337	0.000102074	0.000963933	yes	down	RecName: Full=Probable tripeptidyl-peptidase SED3; AltName: Full=Sedolisin-C; Flags: Precursor
LE01Gene00356	2.63813	1.39951	0.000103089	0.000972675	yes	up	_
LE01Gene02133	2.43708	1.28515	0.0001043	0.000982388	yes	up	_
LE01Gene03453	0.569317	-0.812697	0.000104692	0.000983526	yes	down	RecName: Full=Acyl carrier protein 2, mitochondrial; AltName: Full=MtACP-2; Short=ACP; AltName: Full=NADH-ubiquinone oxidoreductase 9.6 kDa subunit; Flags: Precurs
LE01Gene04329	2.3487	1.23186	0.000104837	0.00098404	yes	up	_
LE01Gene00352	0.654518	-0.611495	0.000107044	0.00100389	yes	down	RecName: Full=5-hydroxyisourate hydrolase; Short=HIU hydrolase; Short=HIUHase; AltName: Full=Transthyretin-like protein; Short=TLP; AltName: Full=Transthyretin-rela
LE01Gene11536	0.64747	-0.627115	0.000107149	0.001004	yes	down	RecName: Full=Dolichyl-phosphate beta-glucosyltransferase; Short=DolP-glucosyltransferase; AltName: Full=Asparagine-linked glycosylation protein 5
LE01Gene01970	0.624417	-0.679418	0.000107586	0.00100636	yes	down	RecName: Full=Peptidyl-prolyl cis-trans isomerase B; Short=PPIase B; AltName: Full=Rotamase B; Flags: Precursor
LE01Gene05300	2.67383	1.41891	0.000109092	0.00101694	yes	up	RecName: Full=Carboxypeptidase S; AltName: Full=GLY-X carboxypeptidase; AltName: Full=YSCS
LE01Gene04056	2.29166	1.19639	0.000109035	0.00101694	yes	up	RecName: Full=D-amino-acid oxidase; Short=DAAO; Short=DAMOX; Short=DAO
LE01Gene05391	0.507432	-0.978715	0.000110553	0.00102879	yes	down	RecName: Full=Probable small nuclear ribonucleoprotein F; Short=snRNP-F; AltName: Full=Sm protein F; Short=Sm-F; Short=SmF
LE01Gene03217	1.54504	0.627642	0.000110528	0.00102879	yes	up	_
LE01Gene00612	1.52305	0.606966	0.000112999	0.00105066	yes	up	_
LE01Gene02431	0.518315	-0.948099	0.000113827	0.00105745	yes	down	RecName: Full=Probable sulfate permease C869.05c
LE01Gene09101	1.68403	0.751915	0.000113977	0.00105794	yes	up	RecName: Full=Aspartic protease; Flags: Precursor
LE01Gene09614	1.5532	0.635241	0.000114343	0.00106043	yes	up	RecName: Full=GTP cyclohydrolase-2; AltName: Full=GTP cyclohydrolase II
LE01Gene08516	0.665541	-0.587401	0.00011479	0.00106367	yes	down	RecName: Full=Uncharacterized transporter C417.10
LE01Gene00999	3.08628	1.62587	0.000116317	0.00107598	yes	up	RecName: Full=Polyporopepsin; AltName: Full=Aspartic proteinase
LE01Gene10871	0.583305	-0.777678	0.000116686	0.00107848	yes	down	_
LE01Gene08753	1.75628	0.812521	0.000116961	0.00108009	yes	up	RecName: Full=Uncharacterized protein C227.15
LE01Gene02232	0.49885	-1.00332	0.000117958	0.00108833	yes	down	_
LE01Gene05168	0.464916	-1.10496	0.000118153	0.00108833	yes	down	_
LE01Gene04969	0.489132	-1.0317	0.000118089	0.00108833	yes	down	RecName: Full=Ornithine decarboxylase; Short=ODC
LE01Gene11941	4.15438	2.05463	0.00011836	0.00108855	yes	up	_
LE01Gene06212	0.255196	-1.97032	0.000118378	0.00108855	yes	down	_
LE01Gene00154	1.88594	0.915284	0.000120394	0.00110616	yes	up	_
LE01Gene06353	1.52475	0.608575	0.000120546	0.00110662	yes	up	RecName: Full=UDP-glucose 6-dehydrogenase; Short=UDP-Glc dehydrogenase; Short=UDP-GlcDH; Short=UDPGDH; AltName: Full=Protein sugarless; AltName: Full=Protein suppenk
LE01Gene02619	0.2428	-2.04216	0.000122074	0.00111969	yes	down	RecName: Full=Endo-1,4-beta-xylanase B; Short=Xylanase B; AltName: Full=1,4-beta-D-xylan xylanohydrolase B; AltName: Full=Endo-1,4-beta-xylanase G1; Short=Xylanase
LE01Gene01789	0.574351	-0.799995	0.000122302	0.00112084	yes	down	RecName: Full=Probable methionine--tRNA ligase, mitochondrial; AltName: Full=Mitochondrial methionyl-tRNA synthetase; Short=MtMetRS; Flags: Precursor
LE01Gene00068	0.625753	-0.676335	0.000124563	0.00113927	yes	down	_
LE01Gene06771	21.6246	4.4346	0.000126571	0.00115412	yes	up	_
LE01Gene03965	0.568098	-0.815787	0.000130661	0.00118843	yes	down	RecName: Full=(S)-coclaurine N-methyltransferase; Short=TfCNMT
LE01Gene04319	2.38259	1.25253	0.000131471	0.00119379	yes	up	_
LE01Gene07194	1.74525	0.803432	0.000131612	0.00119407	yes	up	_
LE01Gene04708	0.429064	-1.22073	0.000132388	0.0011983	yes	down	RecName: Full=ADP,ATP carrier protein; AltName: Full=ADP/ATP translocase; AltName: Full=Adenine nucleotide translocator; Short=ANT
LE01Gene08737	0.484036	-1.04681	0.000132205	0.0011983	yes	down	_
LE01Gene07483	2.09605	1.06767	0.000132409	0.0011983	yes	up	_
LE01Gene14078	1.75596	0.81226	0.000133667	0.00120868	yes	up	RecName: Full=Uridine permease
LE01Gene07804	0.370534	-1.43232	0.000134464	0.00121475	yes	down	_
LE01Gene06422	0.236156	-2.08219	0.000138317	0.00124657	yes	down	RecName: Full=Azole resistance protein 1
LE01Gene11733	3.45789	1.78989	0.000138494	0.00124713	yes	up	RecName: Full=Transcription factor IWS1 IWS1_CRYNJ RecName: Full=Transcription factor IWS1
LE01Gene01728	1.87837	0.909483	0.000138812	0.00124896	yes	up	_
LE01Gene11084	0.575543	-0.797004	0.000139411	0.00125331	yes	down	_
LE01Gene08133	2.31527	1.21118	0.0001397	0.00125488	yes	up	RecName: Full=Uncharacterized protein YcaC
LE01Gene01917	0.644115	-0.634611	0.000142194	0.00127517	yes	down	RecName: Full=mRNA export factor elf1
LE01Gene10462	2.25554	1.17347	0.00014363	0.00128592	yes	up	_
LE01Gene06738	5.62473	2.49178	0.000145549	0.00129988	yes	up	_
LE01Gene11902	1.5412	0.624052	0.000146556	0.0013078	yes	up	_
LE01Gene11022	0.58283	-0.778853	0.000147303	0.00131124	yes	down	RecName: Full=Lysine-specific permease
LE01Gene10219	1.50349	0.588312	0.000147284	0.00131124	yes	up	_
LE01Gene10330	0.575183	-0.797907	0.000147089	0.00131124	yes	down	RecName: Full=Protein SEY1
LE01Gene00899	0.485956	-1.0411	0.000147824	0.0013148	yes	down	RecName: Full=Exodeoxyribonuclease
LE01Gene03027	0.469061	-1.09215	0.000149655	0.00132999	yes	down	RecName: Full=54S ribosomal protein L38, mitochondrial
LE01Gene02949	2.96923	1.57009	0.000151009	0.00134093	yes	up	_
LE01Gene10937	0.647826	-0.626321	0.000151777	0.00134665	yes	down	RecName: Full=Linoleate 10R-lipoxygenase; AltName: Full=Cyclooxygenase-like fatty acid oxygenase; AltName: Full=Fatty acid oxygenase ppoC; AltName: Full=Linoleate
LE01Gene00756	0.54364	-0.879277	0.000152117	0.00134857	yes	down	RecName: Full=Transcription elongation factor 1
LE01Gene11953	0.539184	-0.891149	0.000152565	0.00135143	yes	down	_
LE01Gene04160	0.535228	-0.901774	0.000153612	0.0013596	yes	down	RecName: Full=ER lumen protein-retaining receptor
LE01Gene11979	0.466318	-1.10061	0.000154382	0.0013653	yes	down	_
LE01Gene01541	0.513606	-0.961267	0.000156281	0.00138097	yes	down	RecName: Full=Uncharacterized J domain-containing protein C2E1P5.03; Flags: Precursor
LE01Gene14533	0.478791	-1.06253	0.000158284	0.00139753	yes	down	_
LE01Gene01701	0.665661	-0.587141	0.000158627	0.00139931	yes	down	_
LE01Gene08567	0.664527	-0.589601	0.000158991	0.00140036	yes	down	RecName: Full=ATP-dependent DNA helicase PIF1; AltName: Full=DNA repair and recombination helicase PIF1
LE01Gene03473	1.5205	0.604549	0.0001594	0.00140282	yes	up	_
LE01Gene08221	0.500501	-0.998556	0.000161373	0.00141904	yes	down	RecName: Full=Transposon Ty3-G Gag-Pol polyprotein; AltName: Full=Gag3-Pol3; AltName: Full=Transposon Ty3-1 TYA-TYB polyprotein; Contains: RecName: Full=Capsid pr
LE01Gene07279	1.55132	0.633493	0.00016254	0.00142814	yes	up	RecName: Full=Elongator complex protein 4
LE01Gene09190	0.417945	-1.25862	0.000163015	0.00143001	yes	down	RecName: Full=ATP-dependent RNA helicase mss116, mitochondrial; Flags: Precursor
LE01Gene08132	3.25482	1.70258	0.000162995	0.00143001	yes	up	_
LE01Gene06078	2.35659	1.2367	0.000163299	0.00143134	yes	up	RecName: Full=Probable polyamine oxidase 4; Short=AtPAO4; AltName: Full=Amine oxidase 2
LE01Gene12896	0.622667	-0.683467	0.000168638	0.00147695	yes	down	RecName: Full=Translocation protein sec63
LE01Gene07506	0.514075	-0.959948	0.00017105	0.00149686	yes	down	RecName: Full=Mitochondrial GTP/GDP carrier protein 1
LE01Gene13550	2.35428	1.23529	0.000173691	0.00151752	yes	up	_
LE01Gene06120	0.58517	-0.773073	0.000174245	0.00152114	yes	down	_
LE01Gene07135	0.463303	-1.10997	0.000174949	0.00152606	yes	down	RecName: Full=54S ribosomal protein L37, mitochondrial; AltName: Full=YmL37; Flags: Precursor
LE01Gene05845	1.55404	0.636024	0.000176172	0.00153304	yes	up	RecName: Full=Zinc finger protein sfp1
LE01Gene03947	1.5386	0.621621	0.00017614	0.00153304	yes	up	_
LE01Gene12321	0.530437	-0.914745	0.000177135	0.00154018	yes	down	RecName: Full=Mitochondrial DNA replication protein YHM2
LE01Gene01120	0.570246	-0.810343	0.000178571	0.00155092	yes	down	RecName: Full=V-type proton ATPase subunit e; Short=V-ATPase subunit e; AltName: Full=Vacuolar proton pump subunit e
LE01Gene13399	0.344029	-1.5394	0.000178655	0.00155092	yes	down	RecName: Full=Mitochondrial acidic protein mam33; Flags: Precursor
LE01Gene13969	0.497567	-1.00704	0.000178871	0.00155155	yes	down	RecName: Full=Uncharacterized oxidoreductase CzcO-like
LE01Gene13693	0.190035	-2.39566	0.00017954	0.00155487	yes	down	RecName: Full=Linoleate 10R-lipoxygenase COP4; AltName: Full=(+)-sativene synthase; AltName: Full=Beta-copaene synthase; AltName: Full=Beta-cubebene synthase; AltN
LE01Gene06338	1.68138	0.749649	0.000180288	0.0015601	yes	up	RecName: Full=Hormonally up-regulated neu tumor-associated kinase
LE01Gene13047	1.53826	0.6213	0.000182933	0.00158047	yes	up	_
LE01Gene02685	0.642716	-0.637748	0.000183509	0.00158419	yes	down	_
LE01Gene12576	0.292246	-1.77474	0.000184672	0.0015917	yes	down	_
LE01Gene01946	0.628835	-0.669246	0.00018764	0.00161343	yes	down	_
LE01Gene07302	0.519308	-0.945338	0.000188335	0.00161813	yes	down	RecName: Full=Homocitrate dehydratase, mitochondrial; AltName: Full=Aconitase 2; Flags: Precursor
LE01Gene00159	2.66584	1.41459	0.00018957	0.00162746	yes	up	_
LE01Gene11077	0.442464	-1.17637	0.000191433	0.00163956	yes	down	RecName: Full=Inositol-3-phosphate synthase; AltName: Full=Myo-inositol 1-phosphate synthase; Short=IPS; Short=MI-1-P synthase; Short=MIP synthase
LE01Gene07549	1.6908	0.757704	0.000192412	0.00164665	yes	up	_
LE01Gene02586	0.496331	-1.01062	0.000192647	0.00164736	yes	down	_
LE01Gene08705	1.92644	0.94594	0.000194449	0.00166146	yes	up	_
LE01Gene08345	2.09221	1.06503	0.000195144	0.00166609	yes	up	_
LE01Gene08954	0.486312	-1.04004	0.000195334	0.0016664	yes	down	RecName: Full=Translation machinery-associated protein 7 homolog; AltName: Full=Coiled-coil domain-containing protein 72 homolog
LE01Gene04464	1.7366	0.796264	0.000197641	0.00168476	yes	up	_
LE01Gene13783	0.286093	-1.80545	0.000198681	0.00169097	yes	down	RecName: Full=Histone H4 H4_AGABI RecName: Full=Histone H4
LE01Gene12528	0.576923	-0.793549	0.000198677	0.00169097	yes	down	_
LE01Gene00849	0.586714	-0.769271	0.000203176	0.00172787	yes	down	_
LE01Gene13719	2.02311	1.01657	0.000203995	0.00173213	yes	up	_
LE01Gene05564	0.623469	-0.68161	0.000203896	0.00173213	yes	down	_
LE01Gene03813	0.462864	-1.11134	0.000205659	0.00174353	yes	down	_
LE01Gene10613	2.21211	1.14542	0.000207134	0.00175466	yes	up	_
LE01Gene13680	0.444445	-1.16992	0.000208418	0.00176279	yes	down	RecName: Full=Golgi apparatus membrane protein TVP38
LE01Gene05612	0.658131	-0.603554	0.000210463	0.00177732	yes	down	_
LE01Gene00985	1.70457	0.769406	0.000210644	0.00177746	yes	up	_
LE01Gene09798	2.04004	1.0286	0.000211823	0.00178602	yes	up	_
LE01Gene05292	2.08585	1.06064	0.000214792	0.00180737	yes	up	RecName: Full=Fumarate hydratase, mitochondrial; Short=Fumarase; Flags: Precursor
LE01Gene00633	0.664141	-0.590439	0.000217834	0.0018296	yes	down	RecName: Full=Protein translation factor SUI1
LE01Gene00767	0.555774	-0.847429	0.00021805	0.00183	yes	down	RecName: Full=Dolichol phosphate-mannose biosynthesis regulatory protein; AltName: Full=Dolichol-phosphate mannose synthase subunit 2; Short=DPM synthase subunit 2
LE01Gene09222	2.93731	1.55449	0.000220019	0.00184335	yes	up	_
LE01Gene00468	0.538667	-0.892535	0.000220149	0.00184335	yes	down	RecName: Full=rRNA biogenesis protein RRP5; AltName: Full=Ribosomal RNA-processing protein 5; AltName: Full=U3 small nucleolar RNA-associated protein RRP5; Short=U3
LE01Gene07397	0.308115	-1.69846	0.000220508	0.00184493	yes	down	RecName: Full=Lysophospholipid acyltransferase; Short=LPLAT; AltName: Full=1-acyl-sn-glycerol-3-phosphate acyltransferase; Short=AGPAT; AltName: Full=Lysophosphatid
LE01Gene13031	0.208618	-2.26106	0.000222103	0.00185684	yes	down	RecName: Full=Sterigmatocystin 8-O-methyltransferase; AltName: Full=Aflatoxin biosynthesis protein P; Flags: Precursor
LE01Gene04913	3.26261	1.70603	0.000223063	0.00186344	yes	up	RecName: Full=Uricase; AltName: Full=Urate oxidase
LE01Gene11039	0.526781	-0.924726	0.000223493	0.00186559	yes	down	RecName: Full=Glucan 1,3-beta-glucosidase; AltName: Full=Exo-1,3-beta-glucanase; Flags: Precursor
LE01Gene09162	0.518507	-0.947563	0.000224532	0.00187283	yes	down	RecName: Full=Probable proteasome subunit alpha type-5
LE01Gene00963	2.45656	1.29664	0.0002276	0.0018955	yes	up	RecName: Full=GDP-mannose 4,6 dehydratase; AltName: Full=GDP-D-mannose dehydratase; Short=GMD
LE01Gene03879	0.555216	-0.848878	0.000228494	0.00190149	yes	down	RecName: Full=Oligoribonuclease, mitochondrial; AltName: Full=RNA exonuclease 2 homolog; AltName: Full=Small fragment nuclease; Flags: Precursor
LE01Gene00733	1.6424	0.715805	0.000229348	0.00190568	yes	up	RecName: Full=Fructose-1,6-bisphosphatase, cytosolic; Short=FBPase; AltName: Full=D-fructose-1,6-bisphosphate 1-phosphohydrolase
LE01Gene10981	0.656412	-0.607326	0.000230311	0.00191221	yes	down	_
LE01Gene11871	0.177241	-2.49621	0.000231315	0.00191908	yes	down	_
LE01Gene13028	0.289438	-1.78868	0.000232175	0.00192475	yes	down	_
LE01Gene01566	0.469768	-1.08998	0.000232619	0.00192696	yes	down	RecName: Full=Multisite-specific tRNA:(cytosine-C(5))-methyltransferase; AltName: Full=Multisite-specific tRNA:m5C-methyltransferase; AltName: Full=tRNA (cytosine-5-)
LE01Gene03059	1.72751	0.788695	0.00023418	0.00193841	yes	up	_
LE01Gene05578	0.646876	-0.628439	0.000234625	0.00194062	yes	down	_
LE01Gene00357	0.385023	-1.37698	0.000236097	0.00194982	yes	down	RecName: Full=Glycine dehydrogenase (decarboxylating), mitochondrial; AltName: Full=Glycine cleavage system P protein; AltName: Full=Glycine decarboxylase; AltName:
LE01Gene03071	0.647336	-0.627414	0.000237016	0.00195592	yes	down	RecName: Full=Glucose-induced degradation protein 8 homolog
LE01Gene03896	2.40734	1.26744	0.000238107	0.00196343	yes	up	_
LE01Gene00182	1.79636	0.845074	0.000240972	0.00198555	yes	up	_
LE01Gene05047	1.96272	0.972854	0.000242461	0.00199436	yes	up	RecName: Full=Uncharacterized isomerase PM1503
LE01Gene00805	1.69066	0.757588	0.000243071	0.00199679	yes	up	_
LE01Gene07660	1.57766	0.657783	0.000243545	0.00199916	yes	up	RecName: Full=DNA damage-inducible protein 1
LE01Gene06504	0.20077	-2.31638	0.000244524	0.00200484	yes	down	_
LE01Gene01636	0.439796	-1.18509	0.000244606	0.00200484	yes	down	RecName: Full=Protein ZINC INDUCED FACILITATOR-LIKE 1; AltName: Full=Protein ZIF-LIKE 1
LE01Gene06340	2.44479	1.28971	0.000246067	0.0020153	yes	up	_
LE01Gene11883	0.660464	-0.598447	0.000249914	0.00204373	yes	down	_
LE01Gene00984	1.64027	0.713933	0.000250202	0.00204454	yes	up	_
LE01Gene10246	1.66819	0.738283	0.000253575	0.00207055	yes	up	RecName: Full=Glutamate carboxypeptidase 2; AltName: Full=Folate hydrolase 1; AltName: Full=Folylpoly-gamma-glutamate carboxypeptidase; Short=FGCP; AltName: Full=Glu
LE01Gene12942	4.46268	2.15791	0.00025495	0.00207865	yes	up	_
LE01Gene06455	1.66143	0.732429	0.000256618	0.00209068	yes	up	_
LE01Gene11197	2.74424	1.45641	0.000257668	0.00209765	yes	up	RecName: Full=Dicarboxylic amino acid permease
LE01Gene07762	3.09318	1.62909	0.000259199	0.00210854	yes	up	_
LE01Gene05281	1.51344	0.597835	0.000260186	0.00211498	yes	up	_
LE01Gene02245	0.474845	-1.07447	0.000263432	0.00213977	yes	down	RecName: Full=40S ribosomal protein S23; AltName: Full=Cytoplasmic ribosomal protein 28
LE01Gene02277	0.514173	-0.959675	0.000264296	0.00214358	yes	down	RecName: Full=Protein YIPF5 homolog
LE01Gene14663	1.87521	0.907055	0.000265311	0.0021502	yes	up	RecName: Full=Protein kinase byr2; AltName: Full=MAPK kinase kinase; Short=MAPKKK; AltName: Full=Protein kinase ste8
LE01Gene03449	0.619012	-0.69196	0.000267319	0.00216325	yes	down	RecName: Full=Uncharacterized protein YOL098C
LE01Gene11337	1.69977	0.76534	0.000267222	0.00216325	yes	up	_
LE01Gene01444	0.51306	-0.9628	0.000267773	0.00216531	yes	down	RecName: Full=Probable U6 snRNA-associated Sm-like protein LSm3
LE01Gene00161	1.55805	0.639738	0.000268861	0.00217087	yes	up	RecName: Full=Uncharacterized protein C23G7.06c
LE01Gene07048	1.61561	0.69208	0.00027189	0.0021872	yes	up	RecName: Full=Peroxisomal coenzyme A diphosphatase 1, peroxisomal; Flags: Precursor
LE01Gene10768	1.57392	0.654365	0.000273521	0.0021987	yes	up	RecName: Full=Probable ubiquitin thioesterase DG1039; AltName: Full=Developmental gene 1039 protein
LE01Gene01658	1.54791	0.63032	0.000274325	0.00220352	yes	up	_
LE01Gene03125	0.629447	-0.667843	0.000274693	0.00220486	yes	down	RecName: Full=Trans-acting enoyl reductase
LE01Gene02272	0.651885	-0.617312	0.000281133	0.00224824	yes	down	RecName: Full=Histone deacetylase clr3; AltName: Full=Cryptic loci regulator 3
LE01Gene05777	0.41429	-1.27129	0.000281775	0.00225171	yes	down	_
LE01Gene01247	2.10664	1.07494	0.000284525	0.00227035	yes	up	RecName: Full=GATA zinc finger domain-containing protein 10
LE01Gene04038	0.66641	-0.585517	0.000285826	0.00227905	yes	down	RecName: Full=V-type proton ATPase subunit c''; Short=V-ATPase subunit c''; AltName: Full=V-ATPase 22 kDa proteolipid subunit; AltName: Full=Vacuolar proton pump c''
LE01Gene03582	1.51257	0.596998	0.000286162	0.00228006	yes	up	RecName: Full=Glycerol kinase 2; Short=GK 2; Short=Glycerokinase 2; AltName: Full=ATP:glycerol 3-phosphotransferase 2; AltName: Full=Glycerol kinase, testis specif
LE01Gene05142	0.592032	-0.756254	0.000287843	0.00229177	yes	down	_
LE01Gene05146	0.584454	-0.77484	0.000291119	0.00231577	yes	down	_
LE01Gene08652	0.627259	-0.672867	0.000291804	0.00231821	yes	down	RecName: Full=Probable pre-mRNA-splicing factor ATP-dependent RNA helicase
LE01Gene12061	0.038796	-4.68795	0.000292772	0.00232077	yes	down	_
LE01Gene06654	0.658813	-0.602059	0.000292711	0.00232077	yes	down	RecName: Full=Uncharacterized protein Mb1315
LE01Gene07956	1.73325	0.793483	0.000292981	0.00232077	yes	up	_
LE01Gene03254	2.54278	1.34641	0.000293431	0.00232264	yes	up	_
LE01Gene14045	2.03318	1.02374	0.000293803	0.00232389	yes	up	_
LE01Gene04206	0.529633	-0.916935	0.000301551	0.00237997	yes	down	RecName: Full=Very-long-chain 3-oxoacyl-CoA reductase; AltName: Full=3-ketoacyl-CoA reductase; Short=3-ketoreductase; Short=KAR; AltName: Full=Microsomal beta-keto
LE01Gene09151	0.434424	-1.20283	0.000303383	0.0023927	yes	down	RecName: Full=Mitochondrial substrate carrier family protein G; AltName: Full=Solute carrier family 25 member 20 homolog A
LE01Gene10063	2.40974	1.26888	0.000305278	0.00240589	yes	up	_
LE01Gene10298	1.88781	0.916716	0.000305583	0.00240655	yes	up	RecName: Full=Protein cwh43
LE01Gene07581	1.78322	0.834488	0.00030613	0.00240911	yes	up	_
LE01Gene13008	0.587452	-0.767458	0.000307532	0.00241664	yes	down	_
LE01Gene08537	0.287873	-1.79649	0.000308332	0.00242117	yes	down	_
LE01Gene06315	0.487643	-1.0361	0.000309241	0.0024248	yes	down	RecName: Full=Adenylate kinase; AltName: Full=ATP-AMP transphosphorylase; AltName: Full=ATP:AMP phosphotransferase; AltName: Full=Adenylate kinase cytosolic and mi
LE01Gene13315	0.350268	-1.51347	0.000309166	0.0024248	yes	down	_
LE01Gene01070	2.15094	1.10496	0.000310439	0.00243069	yes	up	_
LE01Gene03330	2.42367	1.27719	0.000315041	0.00246317	yes	up	_
LE01Gene09189	0.38461	-1.37853	0.000317018	0.00247507	yes	down	_
LE01Gene06873	3.4896	1.80306	0.000326126	0.0025407	yes	up	_
LE01Gene06644	1.50967	0.594236	0.000327075	0.00254627	yes	up	_
LE01Gene09455	4.31177	2.10828	0.000327807	0.00255013	yes	up	_
LE01Gene06604	3.90409	1.96499	0.000331184	0.00257272	yes	up	_
LE01Gene06576	0.643608	-0.635746	0.000332867	0.00258025	yes	down	RecName: Full=Peptidyl-prolyl cis-trans isomerase-like 1; Short=PPIase; AltName: Full=Rotamase
LE01Gene06368	0.640678	-0.642328	0.000332809	0.00258025	yes	down	RecName: Full=Metal resistance protein YCF1; AltName: Full=Yeast cadmium factor 1
LE01Gene14057	3.52361	1.81706	0.000339854	0.00263066	yes	up	_
LE01Gene05156	2.26736	1.18101	0.000340795	0.00263607	yes	up	RecName: Full=Probable exo-1,4-beta-xylosidase bxlB; AltName: Full=1,4-beta-D-xylan xylohydrolase bxlB; AltName: Full=Beta-xylosidase bxlB; AltName: Full=Xylobiase
LE01Gene10045	2.15351	1.10669	0.000343272	0.002653	yes	up	_
LE01Gene04033	0.515712	-0.955363	0.000346973	0.00267622	yes	down	RecName: Full=Ribosomal N-lysine methyltransferase 4; AltName: Full=SET domain-containing protein 7
LE01Gene12234	1.52717	0.610861	0.000347715	0.0026781	yes	up	RecName: Full=Serine/threonine-protein kinase ppk16; AltName: Full=Meiotically up-regulated gene 92 protein
LE01Gene03226	0.0387784	-4.6886	0.000349297	0.00268652	yes	down	RecName: Full=ATP-dependent RNA helicase DRS1 DRS1_CRYNJ RecName: Full=ATP-dependent RNA helicase DRS1
LE01Gene08444	0.332013	-1.59069	0.000349899	0.00268925	yes	down	_
LE01Gene13906	1.71126	0.775059	0.000355938	0.0027318	yes	up	RecName: Full=Trehalase; AltName: Full=Alpha,alpha-trehalase; AltName: Full=Alpha,alpha-trehalose glucohydrolase; Flags: Precursor
LE01Gene01445	0.590187	-0.760755	0.000357386	0.00274097	yes	down	_
LE01Gene01921	0.596818	-0.744636	0.000357675	0.00274125	yes	down	RecName: Full=SufE-like protein, chloroplastic; AltName: Full=Protein EMBRYO DEFECTIVE 1374; AltName: Full=Protein SULFUR E; Short=AtSUFE; AltName: Full=Protein SU
LE01Gene08837	0.268112	-1.89909	0.000360275	0.00275923	yes	down	RecName: Full=Cytokinin riboside 5'-monophosphate phosphoribohydrolase LOG2; AltName: Full=Protein LONELY GUY 2
LE01Gene00117	0.636325	-0.652165	0.000362937	0.0027757	yes	down	RecName: Full=Pre-mRNA polyadenylation factor fip1
LE01Gene08045	0.662522	-0.593959	0.000363974	0.00278167	yes	down	RecName: Full=Casein kinase II subunit alpha; Short=CK II subunit alpha
LE01Gene14517	1.71847	0.781123	0.000366358	0.00279793	yes	up	_
LE01Gene08691	0.651103	-0.619043	0.000368705	0.00280795	yes	down	RecName: Full=Mannose-P-dolichol utilization defect 1 protein; AltName: Full=Suppressor of Lec15 and Lec35 glycosylation mutation; Short=SL15
LE01Gene09163	0.472944	-1.08026	0.000368007	0.00280795	yes	down	RecName: Full=Brefeldin A resistance protein
LE01Gene05854	0.520342	-0.942468	0.000371277	0.00282555	yes	down	RecName: Full=Urea active transporter
LE01Gene11331	0.407801	-1.29406	0.000378775	0.00287055	yes	down	_
LE01Gene03216	1.95941	0.970421	0.000382332	0.00289145	yes	up	_
LE01Gene08017	1.90813	0.932157	0.000383229	0.00289622	yes	up	_
LE01Gene04685	2.17293	1.11964	0.000391534	0.00295487	yes	up	RecName: Full=Probable glucose transporter HXT5
LE01Gene08208	0.652723	-0.615458	0.000392201	0.00295785	yes	down	RecName: Full=Pre-mRNA-splicing factor PRP46; AltName: Full=Pre-mRNA-processing protein 46
LE01Gene08980	1.55639	0.6382	0.000401033	0.00302236	yes	up	_
LE01Gene07205	0.365035	-1.45389	0.000405525	0.00304987	yes	down	RecName: Full=Protein mak16
LE01Gene00432	1.55142	0.633591	0.000408132	0.00306522	yes	up	_
LE01Gene05877	0.493033	-1.02024	0.000409186	0.00307101	yes	down	RecName: Full=Double-strand break repair protein MRE11
LE01Gene08749	0.486286	-1.04012	0.000417464	0.00312236	yes	down	RecName: Full=Hydroxymethylglutaryl-CoA synthase A; Short=HMG-CoA synthase A; AltName: Full=3-hydroxy-3-methylglutaryl coenzyme A synthase A
LE01Gene01322	2.31817	1.21298	0.00041824	0.00312601	yes	up	_
LE01Gene14569	0.556466	-0.845634	0.000421277	0.00314438	yes	down	_
LE01Gene00168	1.61677	0.693117	0.000423427	0.00315825	yes	up	_
LE01Gene04698	1.94052	0.956445	0.000424757	0.003166	yes	up	_
LE01Gene02889	0.0234501	-5.41426	0.000425256	0.00316755	yes	down	_
LE01Gene04902	2.27263	1.18436	0.000426772	0.00317666	yes	up	RecName: Full=Fructose-bisphosphate aldolase; Short=FBP aldolase; Short=FBPA; AltName: Full=Fructose-1,6-bisphosphate aldolase
LE01Gene01032	1.59247	0.67127	0.000428572	0.00318569	yes	up	_
LE01Gene08617	0.641457	-0.640577	0.000430177	0.00319543	yes	down	_
LE01Gene05007	2.7704	1.47009	0.000431213	0.00319875	yes	up	RecName: Full=Thioredoxin-like protein 4A; AltName: Full=DIM1 protein homolog; AltName: Full=Spliceosomal U5 snRNP-specific 15 kDa protein; AltName: Full=Thioredox
LE01Gene03854	4.40049	2.13766	0.000433739	0.00321529	yes	up	_
LE01Gene06421	1.65732	0.728855	0.000442115	0.00327069	yes	up	RecName: Full=Sericin-1; AltName: Full=Silk gum protein 1
LE01Gene02649	1.5027	0.587553	0.000442769	0.00327329	yes	up	_
LE01Gene06883	1.71666	0.779602	0.000445341	0.00329007	yes	up	RecName: Full=Aryl-alcohol dehydrogenase
LE01Gene02909	1.78439	0.835427	0.000445973	0.0032925	yes	up	_
LE01Gene03246	1.58966	0.668714	0.000449051	0.00331072	yes	up	RecName: Full=3-ketoacyl-CoA thiolase, peroxisomal; AltName: Full=Acetyl-CoA acyltransferase; AltName: Full=Beta-ketothiolase; AltName: Full=Peroxisomal 3-oxoacyl-CoA
LE01Gene05151	0.539824	-0.889439	0.00044936	0.00331075	yes	down	RecName: Full=Dihydroxyacetone kinase 2; Short=DHA kinase 2; AltName: Full=Glycerone kinase 2; AltName: Full=Triokinase 2; AltName: Full=Triose kinase 2
LE01Gene01952	1.50908	0.593671	0.000450727	0.00331857	yes	up	RecName: Full=General transcription factor IIH subunit 3; AltName: Full=TFIIH basal transcription factor complex subunit 3
LE01Gene05280	2.3873	1.25538	0.000451218	0.00331994	yes	up	_
LE01Gene01049	1.5054	0.590148	0.000451953	0.0033231	yes	up	_
LE01Gene04975	1.8021	0.84968	0.00045581	0.00334524	yes	up	_
LE01Gene10977	1.63274	0.707291	0.000455726	0.00334524	yes	up	RecName: Full=Peroxisome biogenesis protein 19-1; AltName: Full=Peroxin-19-1; Short=AtPEX19-1; AltName: Full=Peroxisomal membrane protein import receptor PEX19-1;
LE01Gene12152	2.01105	1.00795	0.00045765	0.00335363	yes	up	RecName: Full=Multidrug resistance-associated protein 1; AltName: Full=ATP-binding cassette sub-family C member 1; AltName: Full=Leukotriene C(4) transporter; Shor
LE01Gene07383	0.634005	-0.657433	0.000460257	0.00336819	yes	down	_
LE01Gene08998	2.07784	1.05509	0.00046483	0.00339936	yes	up	_
LE01Gene07746	0.476128	-1.07058	0.000467573	0.00341713	yes	down	_
LE01Gene02178	0.607162	-0.719846	0.000468374	0.00342067	yes	down	RecName: Full=Splicing factor U2AF-associated protein 2; AltName: Full=Cold sensitive U2 snRNA suppressor 2 homolog
LE01Gene04731	0.312619	-1.67752	0.00046902	0.00342309	yes	down	_
LE01Gene10067	0.531005	-0.913203	0.000470988	0.00342981	yes	down	_
LE01Gene05810	1.88664	0.915822	0.000471204	0.00342981	yes	up	_
LE01Gene02747	0.572685	-0.804186	0.000472515	0.00343622	yes	down	RecName: Full=Serine/threonine-protein phosphatase 2A activator; AltName: Full=PP2A, subunit B', PR53 isoform; AltName: Full=Phosphotyrosyl phosphatase activator; S
LE01Gene06611	0.572636	-0.804309	0.000473776	0.00344161	yes	down	RecName: Full=Sphingoid long-chain base transporter RSB1
LE01Gene01427	1.72518	0.786743	0.000481096	0.00349245	yes	up	RecName: Full=O-methylsterigmatocystin oxidoreductase; Short=OMST oxidoreductase; AltName: Full=Aflatoxin B synthase; AltName: Full=Aflatoxin biosynthesis protein Q;
LE01Gene11407	0.639563	-0.644842	0.000483677	0.00350884	yes	down	_
LE01Gene04632	1.52107	0.60509	0.00048478	0.00351449	yes	up	RecName: Full=RHO1 GDP-GTP exchange protein 1; AltName: Full=Protein kinase C suppressor SKC1
LE01Gene11191	0.654387	-0.611784	0.000486105	0.00352175	yes	down	_
LE01Gene09682	0.463305	-1.10997	0.000488385	0.0035359	yes	down	_
LE01Gene09723	0.490004	-1.02914	0.000489936	0.00354477	yes	down	_
LE01Gene07982	0.506843	-0.980389	0.000490353	0.00354543	yes	down	RecName: Full=54S ribosomal protein L2, mitochondrial; Flags: Precursor
LE01Gene07569	2.72844	1.44808	0.000491576	0.0035519	yes	up	_
LE01Gene11785	0.590258	-0.760583	0.000493583	0.00356404	yes	down	RecName: Full=N-terminal acetyltransferase A complex catalytic subunit ard1; Short=NatA complex subunit ARD1
LE01Gene06460	2.0366	1.02616	0.000494076	0.00356523	yes	up	_
LE01Gene02351	0.529956	-0.916056	0.000496349	0.00357925	yes	down	RecName: Full=Probable 26S proteasome regulatory subunit rpn6
LE01Gene08934	1.62238	0.698109	0.00050327	0.00361954	yes	up	_
LE01Gene08957	0.637599	-0.649278	0.000505014	0.00362968	yes	down	RecName: Full=ATP-dependent RNA helicase dbp4
LE01Gene11495	2.92991	1.55086	0.000506288	0.00363403	yes	up	_
LE01Gene07300	0.631529	-0.663079	0.000513644	0.00367953	yes	down	RecName: Full=Septin homolog spn3
LE01Gene08436	2.46102	1.29926	0.000514039	0.00367994	yes	up	_
LE01Gene08040	0.61369	-0.704418	0.000517279	0.00369826	yes	down	_
LE01Gene10064	0.619339	-0.691198	0.00051887	0.00370719	yes	down	RecName: Full=Uncharacterized mitochondrial carrier C4G9.20c
LE01Gene12553	2.48621	1.31395	0.000520476	0.00371322	yes	up	_
LE01Gene12531	1.541	0.623869	0.000523566	0.00372848	yes	up	RecName: Full=Fimbrin
LE01Gene02158	0.418874	-1.25541	0.000526514	0.00374701	yes	down	RecName: Full=Minor histocompatibility antigen H13; AltName: Full=Intramembrane protease 1; Short=IMP-1; Short=IMPAS-1; Short=hIMP1; AltName: Full=Presenilin-like p
LE01Gene00675	0.48888	-1.03245	0.000529827	0.00376812	yes	down	_
LE01Gene10230	1.51908	0.6032	0.000532508	0.00378471	yes	up	RecName: Full=Putative epoxide hydrolase; AltName: Full=Epoxide hydratase; Flags: Precursor
LE01Gene07595	1.65577	0.727499	0.000534151	0.00379391	yes	up	_
LE01Gene06767	1.60654	0.683959	0.000535686	0.00380232	yes	up	RecName: Full=Homeobox protein homothorax; AltName: Full=Homeobox protein dorsotonals
LE01Gene13230	4.47534	2.162	0.000537955	0.00381344	yes	up	RecName: Full=Sacsin; AltName: Full=DnaJ homolog subfamily C member 29; Short=DNAJC29
LE01Gene02224	0.584281	-0.775266	0.000539203	0.00381979	yes	down	RecName: Full=Activated RNA polymerase II transcriptional coactivator p15; AltName: Full=SUB1 homolog
LE01Gene00071	0.572933	-0.803562	0.000543101	0.00384117	yes	down	RecName: Full=CCA tRNA nucleotidyltransferase, mitochondrial; AltName: Full=CCA-adding enzyme; AltName: Full=tRNA CCA-pyrophosphorylase; AltName: Full=tRNA adenylyltr
LE01Gene00145	0.62251	-0.68383	0.000544254	0.00384304	yes	down	_
LE01Gene05147	0.647247	-0.627612	0.00054793	0.00386391	yes	down	_
LE01Gene11296	1.9198	0.940958	0.000548276	0.00386391	yes	up	_
LE01Gene01341	0.545732	-0.873737	0.000554242	0.00390089	yes	down	RecName: Full=Splicing factor 3B subunit 6; AltName: Full=Pre-mRNA branch site protein p14; AltName: Full=SF3b 14 kDa subunit; Short=SF3B14a; AltName: Full=Spliceo
LE01Gene12047	3.07118	1.61879	0.000554902	0.00390301	yes	up	RecName: Full=Cytochrome P450 52A12; AltName: Full=Alkane hydroxylase 1; AltName: Full=Alkane-inducible p450alk 1; AltName: Full=DH-ALK2
LE01Gene04211	2.00127	1.00092	0.000562839	0.00395115	yes	up	_
LE01Gene07127	0.657488	-0.604963	0.000565252	0.00396297	yes	down	RecName: Full=Uncharacterized NOC2 family protein C1142.04
LE01Gene05869	2.9891	1.57971	0.000564956	0.00396297	yes	up	_
LE01Gene08268	0.484006	-1.0469	0.000565695	0.00396351	yes	down	RecName: Full=U3 small nucleolar RNA-associated protein 12; Short=U3 snoRNA-associated protein 12; AltName: Full=DOM34-interacting protein 2; AltName: Full=U three
LE01Gene00690	2.17812	1.12308	0.000569816	0.00398212	yes	up	RecName: Full=1-phosphatidylinositol 4,5-bisphosphate phosphodiesterase 1; AltName: Full=Phospholipase C-1; Short=PLC-1
LE01Gene11189	1.72536	0.786896	0.000569619	0.00398212	yes	up	_
LE01Gene04660	0.398266	-1.3282	0.000573284	0.00400377	yes	down	RecName: Full=Laccase-4; AltName: Full=Benzenediol:oxygen oxidoreductase 4; AltName: Full=Diphenol oxidase 4; AltName: Full=Urishiol oxidase 4; Flags: Precursor
LE01Gene03503	0.54369	-0.879143	0.000578123	0.00403497	yes	down	RecName: Full=Asparagine--tRNA ligase; AltName: Full=Asparaginyl-tRNA synthetase; Short=AsnRS
LE01Gene10644	0.475419	-1.07273	0.000579028	0.00403869	yes	down	_
LE01Gene13302	3.20281	1.67934	0.000584087	0.00407136	yes	up	_
LE01Gene09588	1.54931	0.631626	0.00058496	0.00407222	yes	up	_
LE01Gene06297	0.397846	-1.32972	0.000584623	0.00407222	yes	down	_
LE01Gene04605	3.93901	1.97783	0.000585606	0.00407411	yes	up	_
LE01Gene03174	1.97718	0.983446	0.00058891	0.00409447	yes	up	RecName: Full=Vacuolar protein sorting-associated protein 13; AltName: Full=Suppression of the onset of impotence protein 1; AltName: Full=Vacuolar protein-targetin
LE01Gene00376	1.97308	0.980446	0.0005902	0.00410081	yes	up	_
LE01Gene02364	0.510756	-0.969293	0.000603127	0.00418528	yes	down	_
LE01Gene00150	0.531135	-0.912848	0.000609252	0.00422238	yes	down	_
LE01Gene12943	2.72839	1.44805	0.000610653	0.0042267	yes	up	_
LE01Gene07458	0.465902	-1.1019	0.000610538	0.0042267	yes	down	_
LE01Gene03917	2.13567	1.09469	0.000612957	0.00423994	yes	up	_
LE01Gene12742	2.19413	1.13365	0.000616822	0.00426396	yes	up	_
LE01Gene08531	0.608579	-0.716484	0.000620424	0.00427383	yes	down	RecName: Full=Cytochrome c oxidase assembly protein COX19
LE01Gene03586	0.510144	-0.971025	0.00062061	0.00427383	yes	down	RecName: Full=50S ribosomal protein L21
LE01Gene00306	1.75127	0.808401	0.000619251	0.00427383	yes	up	RecName: Full=Alkaline ceramidase 3; Short=AlkCDase 3; Short=Alkaline CDase 3; AltName: Full=Alkaline dihydroceramidase SB89; AltName: Full=Alkaline phytoceramida
LE01Gene00087	0.613537	-0.704777	0.000621455	0.00427693	yes	down	RecName: Full=ATP-dependent RNA helicase eIF4A; AltName: Full=Eukaryotic initiation factor 4A; Short=eIF-4A; AltName: Full=Translation initiation factor 1
LE01Gene05894	0.281156	-1.83056	0.000623916	0.00429115	yes	down	_
LE01Gene09140	0.57638	-0.794908	0.000626045	0.00430035	yes	down	_
LE01Gene09851	0.532535	-0.909053	0.000627232	0.00430578	yes	down	RecName: Full=ATP-dependent RNA helicase suv3, mitochondrial; Flags: Precursor
LE01Gene02960	0.604904	-0.725223	0.000636825	0.00436887	yes	down	_
LE01Gene12695	1.69755	0.763454	0.000637635	0.00437166	yes	up	_
LE01Gene07337	0.632212	-0.661519	0.000639704	0.00438308	yes	down	RecName: Full=EKC/KEOPS complex subunit CGI121
LE01Gene00313	0.531553	-0.911715	0.000646842	0.0044264	yes	down	_
LE01Gene04520	0.600055	-0.736833	0.000650279	0.00444712	yes	down	RecName: Full=Putative monoglyceride lipase; Short=MGL; AltName: Full=Monoacylglycerol hydrolase; Short=MAG hydrolase; Short=MGH; AltName: Full=Monoacylglycerol lip
LE01Gene12483	1.68631	0.753868	0.00065166	0.00445376	yes	up	RecName: Full=Uncharacterized lactate 2-monooxygenase PB1A11.03
LE01Gene09670	1.75412	0.810748	0.000655175	0.00447497	yes	up	RecName: Full=Acyl-CoA desaturase; AltName: Full=Delta(9)-desaturase; Short=Delta-9 desaturase; AltName: Full=Fatty acid desaturase; AltName: Full=Stearoyl-CoA desa
LE01Gene07770	0.411899	-1.27964	0.000658887	0.00449467	yes	down	_
LE01Gene03359	2.01211	1.00871	0.000662283	0.004515	yes	up	_
LE01Gene05363	0.430872	-1.21467	0.000666072	0.00453798	yes	down	RecName: Full=Salicylate hydroxylase; AltName: Full=Salicylate 1-monooxygenase
LE01Gene09550	0.525563	-0.928065	0.000669603	0.00455829	yes	down	RecName: Full=Emopamil-binding protein-like; AltName: Full=Emopamil-binding-related protein
LE01Gene06169	0.324069	-1.62563	0.000669892	0.00455829	yes	down	_
LE01Gene10693	0.614417	-0.702711	0.000672217	0.00457124	yes	down	_
LE01Gene11233	2.87021	1.52115	0.000676872	0.00460002	yes	up	_
LE01Gene09671	1.72565	0.787136	0.000678361	0.00460725	yes	up	RecName: Full=Structural maintenance of chromosomes protein 6; Short=SMC protein 6; Short=SMC-6; Short=xSMC6
LE01Gene11802	0.540414	-0.887863	0.000682708	0.00463388	yes	down	RecName: Full=Peptidyl-prolyl cis-trans isomerase slr1251; Short=PPIase slr1251; AltName: Full=Rotamase slr1251
LE01Gene05459	1.81708	0.861619	0.000686523	0.00465395	yes	up	_
LE01Gene13811	4.61906	2.2076	0.000690453	0.00467376	yes	up	_
LE01Gene11559	1.61425	0.690868	0.000690735	0.00467376	yes	up	_
LE01Gene08155	0.632468	-0.660936	0.000696348	0.0047088	yes	down	RecName: Full=ATP synthase subunit f, mitochondrial; Flags: Precursor
LE01Gene07362	0.594922	-0.749228	0.000698392	0.00471931	yes	down	RecName: Full=Glucosidase 2 subunit beta; AltName: Full=Alpha-glucosidase 2 subunit beta; Flags: Precursor
LE01Gene11378	1.80795	0.854356	0.00069892	0.00471931	yes	up	RecName: Full=Protein vip1
LE01Gene04873	0.600731	-0.73521	0.00069964	0.00471931	yes	down	RecName: Full=Pre-mRNA-splicing factor ISY1 ISY1_CRYNJ RecName: Full=Pre-mRNA-splicing factor ISY1
LE01Gene13442	0.638833	-0.646489	0.000699618	0.00471931	yes	down	RecName: Full=Free methionine-R-sulfoxide reductase; Short=fRMsr; AltName: Full=GAF domain-containing protein YKL069W
LE01Gene07248	0.555906	-0.847087	0.000705017	0.00474968	yes	down	RecName: Full=Small nuclear ribonucleoprotein Sm D2; Short=Sm-D2; AltName: Full=Complexed with cdc5 protein 9; AltName: Full=snRNP core protein D2
LE01Gene06922	3.48493	1.80113	0.000717719	0.00482328	yes	up	RecName: Full=Aspergillopepsin-2; AltName: Full=Acid protease A; AltName: Full=Aspergillopepsin II; AltName: Full=Proctase A; Contains: RecName: Full=Aspergillopepsin
LE01Gene07803	2.09101	1.0642	0.000720615	0.00483975	yes	up	RecName: Full=Sexual differentiation process protein isp4
LE01Gene06821	0.612811	-0.706485	0.000721789	0.00484464	yes	down	RecName: Full=tRNA (adenine(58)-N(1))-methyltransferase catalytic subunit TRM61; AltName: Full=tRNA(m1A58)-methyltransferase subunit TRM61; Short=tRNA(m1A58)MTase
LE01Gene11231	0.651003	-0.619265	0.000724676	0.00485801	yes	down	_
LE01Gene00273	0.593953	-0.75158	0.000739172	0.00494298	yes	down	_
LE01Gene11237	0.636818	-0.651046	0.000738839	0.00494298	yes	down	_
LE01Gene03976	0.521031	-0.940558	0.000741772	0.00495427	yes	down	_
LE01Gene00526	2.99729	1.58366	0.000748433	0.00499262	yes	up	RecName: Full=Poly(A)+ RNA export protein
LE01Gene11045	9.60945	3.26445	0.000751351	0.00500901	yes	up	_
LE01Gene03574	1.69544	0.761657	0.000753176	0.0050181	yes	up	_
LE01Gene04764	0.622758	-0.683258	0.000754259	0.00502223	yes	down	RecName: Full=Eukaryotic translation initiation factor 3 subunit A; Short=eIF3a; AltName: Full=Eukaryotic translation initiation factor 3 110 kDa subunit homolog;
LE01Gene09292	2.0338	1.02418	0.000755132	0.00502339	yes	up	_
LE01Gene05173	0.541711	-0.884404	0.000757591	0.00503515	yes	down	_
LE01Gene11268	0.356443	-1.48826	0.000758553	0.00503846	yes	down	RecName: Full=Probable mannan endo-1,4-beta-mannosidase A; AltName: Full=Endo-beta-1,4-mannanase A; Flags: Precursor
LE01Gene01320	0.588784	-0.76419	0.000759317	0.00504046	yes	down	_
LE01Gene09451	7.77357	2.95858	0.000769993	0.00510508	yes	up	_
LE01Gene08070	0.446709	-1.16259	0.000776656	0.00513671	yes	down	_
LE01Gene11329	1.50984	0.594395	0.000776525	0.00513671	yes	up	RecName: Full=Zinc-regulated transporter 1; AltName: Full=High-affinity zinc transport protein ZRT1
LE01Gene03461	0.527273	-0.923377	0.000781133	0.0051569	yes	down	RecName: Full=Eukaryotic translation initiation factor 3 subunit H; Short=eIF3h
LE01Gene05754	1.6741	0.743386	0.000783009	0.00516615	yes	up	_
LE01Gene12364	2.25005	1.16996	0.000783711	0.00516764	yes	up	_
LE01Gene04292	0.555045	-0.849323	0.000787131	0.00518704	yes	down	RecName: Full=NADH dehydrogenase
LE01Gene12181	0.634253	-0.65687	0.000804141	0.0052895	yes	down	_
LE01Gene06293	2.07777	1.05504	0.000805401	0.00529244	yes	up	RecName: Full=Metacaspase-1; Flags: Precursor
LE01Gene01011	0.635705	-0.653572	0.000805561	0.00529244	yes	down	RecName: Full=Signal recognition particle 9 kDa protein; Short=SRP9
LE01Gene06952	4.01955	2.00703	0.00080694	0.00529829	yes	up	_
LE01Gene11410	0.535966	-0.899786	0.000808311	0.00530408	yes	down	_
LE01Gene13293	1.75316	0.809959	0.000809839	0.0053109	yes	up	_
LE01Gene05822	1.6899	0.756935	0.000816713	0.00535275	yes	up	_
LE01Gene01010	0.660433	-0.598516	0.000822309	0.00538292	yes	down	RecName: Full=Mitochondrial 2-oxodicarboxylate carrier 2
LE01Gene00144	0.558336	-0.840794	0.000825245	0.00539889	yes	down	RecName: Full=Protein MEI2-like 3; Short=OML3; AltName: Full=MEI2-like protein 3
LE01Gene05744	0.576159	-0.79546	0.000829555	0.0054173	yes	down	RecName: Full=High-affinity glucose transporter
LE01Gene10350	0.555931	-0.847023	0.000833632	0.00544065	yes	down	RecName: Full=p21-activated protein kinase-interacting protein 1; AltName: Full=PAK/PLC-interacting protein 1; Short=hPIP1; AltName: Full=PAK1-interacting protein
LE01Gene11004	0.597752	-0.74238	0.000845216	0.00550963	yes	down	RecName: Full=Uncharacterized protein C57A10.07
LE01Gene04065	0.569702	-0.81172	0.000848442	0.00552734	yes	down	_
LE01Gene03037	0.616627	-0.697529	0.000854409	0.00556288	yes	down	RecName: Full=Vacuolar protein sorting-associated protein 29; AltName: Full=Vesicle protein sorting 29
LE01Gene12754	2.04194	1.02994	0.000855046	0.00556369	yes	up	RecName: Full=Negative regulator of sexual conjugation and meiosis
LE01Gene01711	2.09717	1.06844	0.000855669	0.00556441	yes	up	_
LE01Gene02691	0.472569	-1.0814	0.000864741	0.00561332	yes	down	_
LE01Gene09638	0.610518	-0.711894	0.000864719	0.00561332	yes	down	_
LE01Gene02966	2.23016	1.15715	0.000867575	0.00562835	yes	up	RecName: Full=Mitochondrial outer membrane protein IML2
LE01Gene00104	2.02419	1.01734	0.000869256	0.0056359	yes	up	RecName: Full=Sulfated surface glycoprotein 185; Short=SSG 185; Flags: Precursor
LE01Gene06390	1.59394	0.672599	0.000877079	0.00568322	yes	up	_
LE01Gene14686	0.530828	-0.913684	0.000877636	0.00568344	yes	down	RecName: Full=78 kDa glucose-regulated protein homolog; Short=GRP-78; AltName: Full=Immunoglobulin heavy chain-binding protein homolog; Short=BiP; Flags: Precursor
LE01Gene05525	2.20933	1.14361	0.00088089	0.00569771	yes	up	_
LE01Gene05283	4.08874	2.03166	0.000885909	0.00572677	yes	up	_
LE01Gene06975	1.70685	0.771332	0.000890546	0.0057499	yes	up	RecName: Full=Probable succinyl-CoA:3-ketoacid coenzyme A transferase, mitochondrial; AltName: Full=3-oxoacid CoA-transferase; Flags: Precursor
LE01Gene06565	1.7513	0.808423	0.00089394	0.00576838	yes	up	RecName: Full=A-agglutinin anchorage subunit; AltName: Full=A-agglutinin cell wall attachment subunit; Flags: Precursor
LE01Gene10194	0.568967	-0.813583	0.0008973	0.00578662	yes	down	RecName: Full=Peptidyl-prolyl cis-trans isomerase CYP63; Short=AtCYP63; Short=PPIase CYP63; AltName: Full=Cyclophilin-63; AltName: Full=Cyclophilin-like protein Cy
LE01Gene00323	0.612192	-0.707944	0.000899982	0.0057936	yes	down	RecName: Full=Nucleoporin pom152
LE01Gene11312	0.3102	-1.68873	0.000899623	0.0057936	yes	down	_
LE01Gene09384	3.1059	1.63501	0.000900771	0.00579498	yes	up	_
LE01Gene05226	2.23579	1.16078	0.000904375	0.00581154	yes	up	_
LE01Gene09378	0.560849	-0.834315	0.000905032	0.00581233	yes	down	_
LE01Gene00011	1.54307	0.6258	0.000906184	0.00581629	yes	up	RecName: Full=Iron-sulfur assembly protein 1
LE01Gene00634	0.616538	-0.697739	0.000908695	0.00582587	yes	down	_
LE01Gene12546	0.535935	-0.899871	0.000910612	0.00582947	yes	down	_
LE01Gene11689	1.5799	0.659837	0.000910245	0.00582947	yes	up	RecName: Full=Dual specificity protein phosphatase PPS1
LE01Gene02147	0.62211	-0.684759	0.000912347	0.00583172	yes	down	RecName: Full=Ribosome assembly protein 4
LE01Gene13611	3.41575	1.7722	0.000915116	0.00584598	yes	up	_
LE01Gene00079	4.5885	2.19802	0.000919542	0.0058708	yes	up	RecName: Full=Cytochrome P450 714A2; AltName: Full=EUI-like P450 A2
LE01Gene00933	1.5564	0.638217	0.000924124	0.00589312	yes	up	_
LE01Gene05032	2.12149	1.08508	0.000929662	0.00592496	yes	up	RecName: Full=Iron transport multicopper oxidase FET3; Flags: Precursor
LE01Gene09079	2.81935	1.49536	0.000933039	0.005943	yes	up	RecName: Full=Probable alpha/beta-glucosidase agdC; Flags: Precursor
LE01Gene01733	1.67597	0.745	0.000939862	0.00597944	yes	up	RecName: Full=Sex-determining region Y protein; AltName: Full=Testis-determining factor
LE01Gene10218	2.81275	1.49198	0.000944479	0.0060053	yes	up	_
LE01Gene06101	1.63072	0.705511	0.000954043	0.00605901	yes	up	_
LE01Gene09289	0.549711	-0.863255	0.00095516	0.00606256	yes	down	_
LE01Gene09259	1.53743	0.620522	0.000962798	0.0061039	yes	up	_
LE01Gene00959	0.449873	-1.15241	0.000965431	0.00611702	yes	down	RecName: Full=RuvB-like helicase 2
LE01Gene09662	1.57148	0.652128	0.000979641	0.00619622	yes	up	RecName: Full=Zinc transporter ZIP9; AltName: Full=Solute carrier family 39 member 9; AltName: Full=Zrt- and Irt-like protein 9; Short=ZIP-9
LE01Gene07290	1.72531	0.786859	0.000982487	0.00620699	yes	up	_
LE01Gene04742	0.579254	-0.787733	0.00100409	0.00632137	yes	down	_
LE01Gene05196	0.645416	-0.631699	0.00101391	0.00637583	yes	down	_
LE01Gene11053	1.51181	0.596273	0.00102062	0.00640691	yes	up	_
LE01Gene09344	0.488871	-1.03248	0.00102669	0.00644128	yes	down	RecName: Full=13 kDa ribonucleoprotein-associated protein
LE01Gene07947	0.658574	-0.602582	0.00102747	0.00644242	yes	down	RecName: Full=Proteasome subunit beta type-5; AltName: Full=Macropain subunit PRE2; AltName: Full=Multicatalytic endopeptidase complex subunit PRE2; AltName: Full=Pro
LE01Gene13817	3.64091	1.8643	0.00103042	0.00644976	yes	up	RecName: Full=Aldehyde reductase 1; Short=ALR 1; AltName: Full=Alcohol dehydrogenase
LE01Gene11726	0.338788	-1.56155	0.00102987	0.00644976	yes	down	_
LE01Gene12460	2.06949	1.04928	0.00103295	0.00645819	yes	up	RecName: Full=Probable DNA repair helicase ercc3
LE01Gene05318	0.518147	-0.948568	0.00104345	0.00651634	yes	down	RecName: Full=Translation machinery-associated protein 16
LE01Gene01230	0.600975	-0.734624	0.00105634	0.00659304	yes	down	RecName: Full=Putative epoxide hydrolase; AltName: Full=Epoxide hydratase; Flags: Precursor
LE01Gene13312	18.6832	4.22367	0.00106415	0.00663413	yes	up	_
LE01Gene01531	0.616005	-0.698985	0.00106486	0.00663475	yes	down	_
LE01Gene08418	0.359724	-1.47504	0.00107217	0.00666883	yes	down	RecName: Full=Nuclear localization sequence-binding protein; AltName: Full=p67
LE01Gene12955	0.185144	-2.43328	0.00107487	0.00667794	yes	down	_
LE01Gene09333	3.22994	1.69151	0.00107986	0.0066975	yes	up	RecName: Full=Phospholipase B; AltName: Full=Lysophospholipase; Flags: Precursor
LE01Gene01416	3.25035	1.70059	0.00108407	0.00671594	yes	up	_
LE01Gene11477	2.43381	1.28321	0.00108696	0.00672997	yes	up	RecName: Full=Protein piccolo; AltName: Full=Aczonin; AltName: Full=Brain-derived HLMN protein; AltName: Full=Multidomain presynaptic cytomatrix protein
LE01Gene10023	0.377266	-1.40635	0.0010883	0.00673443	yes	down	RecName: Full=Suppressor protein SRP40
LE01Gene06747	1.58323	0.662869	0.00111123	0.00685292	yes	up	RecName: Full=Fatty aldehyde dehydrogenase; AltName: Full=Aldehyde dehydrogenase 10; AltName: Full=Aldehyde dehydrogenase family 3 member A2; AltName: Full=Microsom
LE01Gene03596	0.591309	-0.758016	0.00111272	0.00685543	yes	down	RecName: Full=Ribosome production factor 1; AltName: Full=Ribosome biogenesis protein RPF1
LE01Gene12934	3.92438	1.97246	0.00111759	0.00687297	yes	up	_
LE01Gene03095	1.53375	0.617064	0.00112878	0.0069321	yes	up	_
LE01Gene07878	0.532827	-0.908261	0.00112918	0.0069321	yes	down	_
LE01Gene00400	2.20625	1.14159	0.00113398	0.00695371	yes	up	_
LE01Gene12370	1.56587	0.646961	0.00113819	0.00697557	yes	up	RecName: Full=Tetraketide alpha-pyrone reductase 2; AltName: Full=Protein CINNAMOYL-COA REDUCTASE-LIKE 6
LE01Gene10336	2.03029	1.02168	0.00114234	0.0069932	yes	up	_
LE01Gene10273	0.563945	-0.826374	0.00114627	0.00701324	yes	down	RecName: Full=O-methylsterigmatocystin oxidoreductase; Short=OMST oxidoreductase; AltName: Full=Aflatoxin B synthase; AltName: Full=Aflatoxin biosynthesis protein
LE01Gene00121	0.462278	-1.11317	0.00114919	0.00702317	yes	down	RecName: Full=Probable thymidylate synthase; Short=TS; Short=TSase
LE01Gene04501	0.638212	-0.647892	0.00116434	0.00710779	yes	down	_
LE01Gene06258	1.9869	0.990518	0.00116569	0.00710805	yes	up	_
LE01Gene13973	0.136751	-2.87038	0.00116537	0.00710805	yes	down	_
LE01Gene11404	0.544883	-0.875982	0.00116769	0.00711225	yes	down	_
LE01Gene10653	1.83355	0.874642	0.00116725	0.00711225	yes	up	RecName: Full=Probable low-specificity L-threonine aldolase
LE01Gene10668	0.471241	-1.08546	0.00116917	0.00711725	yes	down	RecName: Full=Probable peptidyl-tRNA hydrolase 2; Short=PTH 2
LE01Gene10471	1.57422	0.654634	0.00117266	0.00713449	yes	up	_
LE01Gene04982	0.61854	-0.693062	0.001178	0.00715897	yes	down	RecName: Full=DNA-(apurinic or apyrimidinic site) lyase 2; AltName: Full=AP endonuclease 2; AltName: Full=Apurinic-apyrimidinic endonuclease 2
LE01Gene05873	0.454192	-1.13863	0.00117743	0.00715897	yes	down	RecName: Full=Uncharacterized ATP-dependent helicase C23E6.02
LE01Gene05410	2.3654	1.24208	0.00118303	0.00718554	yes	up	RecName: Full=Serine carboxypeptidase-like 11; Flags: Precursor
LE01Gene07490	0.638053	-0.648251	0.00118669	0.00720375	yes	down	_
LE01Gene04909	3.68302	1.88089	0.00119372	0.0072383	yes	up	_
LE01Gene03143	10.3166	3.3669	0.00120582	0.00729585	yes	up	_
LE01Gene06913	2.87666	1.52439	0.00121384	0.00733575	yes	up	_
LE01Gene05328	2.64743	1.40459	0.00121514	0.00733953	yes	up	RecName: Full=Protoplast secreted protein 2; Flags: Precursor
LE01Gene11880	0.559758	-0.837125	0.00121941	0.0073571	yes	down	_
LE01Gene02283	1.5414	0.624242	0.00122708	0.0073952	yes	up	_
LE01Gene11051	5.62234	2.49117	0.00123188	0.00741562	yes	up	_
LE01Gene03476	1.60493	0.682509	0.00123252	0.00741562	yes	up	_
LE01Gene12915	1.68345	0.751423	0.00123375	0.0074176	yes	up	_
LE01Gene00444	0.607638	-0.718715	0.0012356	0.0074176	yes	down	RecName: Full=Ribosome assembly protein rrb1
LE01Gene10625	0.652004	-0.617048	0.00123722	0.0074176	yes	down	RecName: Full=Prohibitin-1
LE01Gene01472	1.90935	0.933083	0.00123747	0.0074176	yes	up	_
LE01Gene13268	0.575714	-0.796576	0.00123816	0.0074176	yes	down	_
LE01Gene10212	0.643791	-0.635336	0.00123777	0.0074176	yes	down	RecName: Full=Uncharacterized oxidoreductase C736.13
LE01Gene08034	0.663209	-0.592464	0.00124108	0.00743005	yes	down	RecName: Full=Biotin synthase
LE01Gene02421	0.527714	-0.922173	0.00124284	0.00743649	yes	down	RecName: Full=54S ribosomal protein L31, mitochondrial; AltName: Full=Negative regulator of cdc42 protein nrf20; Flags: Precursor
LE01Gene01394	1.83702	0.877366	0.00124586	0.00745047	yes	up	_
LE01Gene10878	2.77406	1.472	0.00125304	0.00748901	yes	up	RecName: Full=Aromatic peroxygenase
LE01Gene00123	0.368415	-1.4406	0.00125437	0.00748901	yes	down	_
LE01Gene05688	1.5381	0.621151	0.0012541	0.00748901	yes	up	_
LE01Gene08790	0.470486	-1.08778	0.00126165	0.00751366	yes	down	RecName: Full=Probable mitochondrial chaperone BCS1-B; AltName: Full=BCS1-like protein 2
LE01Gene03221	1.58001	0.659933	0.00126023	0.00751366	yes	up	_
LE01Gene01489	1.69755	0.76345	0.00127059	0.00755673	yes	up	RecName: Full=Counting factor 45-1; Flags: Precursor
LE01Gene02023	1.59425	0.672876	0.00127324	0.00756838	yes	up	_
LE01Gene02278	0.507499	-0.978524	0.00127509	0.00757104	yes	down	RecName: Full=Ribosome biogenesis protein NSA2 NSA2_CRYNJ RecName: Full=Ribosome biogenesis protein NSA2
LE01Gene06992	1.85023	0.887702	0.00127727	0.00757986	yes	up	RecName: Full=Delta-1-pyrroline-5-carboxylate dehydrogenase; Short=P5C dehydrogenase; AltName: Full=L-glutamate gamma-semialdehyde dehydrogenase
LE01Gene00100	0.664704	-0.589216	0.00128069	0.00759187	yes	down	RecName: Full=Small glutamine-rich tetratricopeptide repeat-containing protein 2
LE01Gene05804	0.659099	-0.601432	0.00128155	0.0075928	yes	down	_
LE01Gene04327	0.476983	-1.06799	0.00128947	0.00763551	yes	down	RecName: Full=Ribosome biogenesis protein YTM1
LE01Gene03507	0.512474	-0.964449	0.00129016	0.00763551	yes	down	RecName: Full=Mitochondrial import inner membrane translocase subunit TIM54 TIM54_CRYNJ RecName: Full=Mitochondrial import inner membrane
LE01Gene08264	0.661536	-0.596109	0.00129357	0.00765153	yes	down	RecName: Full=Dolichyl pyrophosphate Glc1Man9GlcNAc2 alpha-1,3-glucosyltransferase; AltName: Full=Asparagine-linked glycosylation protein 8; AltName: Full=Dol-P-Gl
LE01Gene01868	0.539552	-0.890167	0.00130877	0.007733	yes	down	RecName: Full=Ribosome production factor 2 homolog; AltName: Full=Brix domain-containing protein 1 homolog; AltName: Full=Ribosome biogenesis protein RPF2 homolog
LE01Gene01099	0.530878	-0.913547	0.00131263	0.00775157	yes	down	RecName: Full=Glutaredoxin-1
LE01Gene00083	3.45107	1.78705	0.00134031	0.00789785	yes	up	_
LE01Gene11333	3.63387	1.86151	0.00135143	0.00795476	yes	up	_
LE01Gene08142	1.50921	0.593789	0.00135667	0.00797696	yes	up	RecName: Full=Probable alpha-L-arabinofuranosidase C; Short=ABF C; Short=Arabinosidase C; Flags: Precursor
LE01Gene11173	2.21441	1.14692	0.00136005	0.0079882	yes	up	_
LE01Gene13878	1.50757	0.592229	0.00136255	0.00799851	yes	up	_
LE01Gene11570	1.99529	0.996596	0.00136764	0.00802407	yes	up	_
LE01Gene07986	1.60033	0.678372	0.00137668	0.00806842	yes	up	_
LE01Gene11482	0.58546	-0.772357	0.00138233	0.00809281	yes	down	RecName: Full=Mitochondrial import inner membrane translocase subunit TIM9 TIM9_CRYNJ RecName: Full=Mitochondrial import inner membrane tr
LE01Gene01560	1.5419	0.624709	0.00138832	0.00812348	yes	up	_
LE01Gene00379	1.79319	0.842532	0.00140064	0.00819113	yes	up	_
LE01Gene03099	0.654265	-0.612053	0.0014092	0.00823675	yes	down	_
LE01Gene03436	0.527186	-0.923616	0.00141285	0.00825366	yes	down	_
LE01Gene00336	0.444568	-1.16952	0.0014161	0.00826822	yes	down	RecName: Full=U3 small nucleolar RNA-associated protein 17; Short=U3 snoRNA-associated protein 17; AltName: Full=U3 protein 17 required for transcription
LE01Gene10604	1.79844	0.846744	0.00141892	0.0082802	yes	up	_
LE01Gene12188	1.83395	0.874956	0.00142531	0.00831302	yes	up	RecName: Full=Meiotically up-regulated gene 158 protein
LE01Gene10877	2.67754	1.42091	0.00142667	0.00831652	yes	up	RecName: Full=Aromatic peroxygenase
LE01Gene11648	1.65815	0.729576	0.0014331	0.0083495	yes	up	_
LE01Gene01527	3.08931	1.62728	0.00143613	0.00835961	yes	up	RecName: Full=Negative regulator of sexual conjugation and meiosis
LE01Gene09969	2.62376	1.39164	0.00143638	0.00835961	yes	up	_
LE01Gene01103	0.54443	-0.87718	0.00143985	0.00837533	yes	down	_
LE01Gene01176	1.6585	0.729877	0.00144225	0.00838483	yes	up	_
LE01Gene08238	1.89773	0.924276	0.00144533	0.00839492	yes	up	RecName: Full=Uncharacterized oxidoreductase C115.03
LE01Gene03137	0.509772	-0.972076	0.00144553	0.00839492	yes	down	RecName: Full=Dihydrofolate reductase
LE01Gene10197	8.32944	3.05822	0.00145026	0.00841786	yes	up	_
LE01Gene04944	0.550002	-0.862491	0.00145393	0.00843463	yes	down	_
LE01Gene00211	1.71293	0.776464	0.00148207	0.00857041	yes	up	_
LE01Gene08135	1.73009	0.790845	0.00148162	0.00857041	yes	up	RecName: Full=Formate dehydrogenase 2, mitochondrial; AltName: Full=NAD-dependent formate dehydrogenase 2; Short=FDH 2; Flags: Precursor
LE01Gene06321	2.46819	1.30345	0.00149307	0.00862293	yes	up	RecName: Full=Potassium-transporting ATPase alpha chain 2; AltName: Full=Non-gastric H(+)/K(+) ATPase subunit alpha; AltName: Full=Proton pump
LE01Gene00694	1.70051	0.765964	0.0014954	0.00862915	yes	up	_
LE01Gene05421	0.509325	-0.973342	0.00150529	0.00868158	yes	down	RecName: Full=Homoisocitrate dehydrogenase, mitochondrial; Short=HIcDH; Flags: Precursor
LE01Gene06800	2.06379	1.04529	0.00150623	0.00868242	yes	up	RecName: Full=Mitomycin radical oxidase
LE01Gene12599	0.374043	-1.41873	0.00151918	0.00874778	yes	down	_
LE01Gene03219	0.602624	-0.73067	0.00152117	0.00874995	yes	down	RecName: Full=UPF0160 protein
LE01Gene00136	0.628941	-0.669004	0.00152094	0.00874995	yes	down	_
LE01Gene02240	0.640036	-0.643775	0.00152851	0.00878287	yes	down	RecName: Full=Transmembrane 9 superfamily member 2; Flags: Precursor
LE01Gene04172	0.572414	-0.804868	0.00153815	0.00882425	yes	down	RecName: Full=DNA polymerase epsilon catalytic subunit A; AltName: Full=DNA polymerase II subunit A DPOE_CRYNJ RecName: Full=DNA polymeras
LE01Gene05028	0.566202	-0.820612	0.00155403	0.00889693	yes	down	RecName: Full=L-2,3-butanediol dehydrogenase; Short=L-BDH; AltName: Full=(S,S)-butanediol dehydrogenase; AltName: Full=Diacetyl reductase
LE01Gene03314	3.27315	1.71068	0.00155941	0.00892265	yes	up	_
LE01Gene00286	2.02331	1.01672	0.00157021	0.008975	yes	up	_
LE01Gene08254	0.611013	-0.710725	0.00157129	0.00897643	yes	down	RecName: Full=Ribonucleoside-diphosphate reductase small chain; AltName: Full=Ribonucleotide reductase small subunit
LE01Gene03363	0.528376	-0.920363	0.0015818	0.00903172	yes	down	_
LE01Gene09316	45.8119	5.51765	0.00158628	0.00905256	yes	up	_
LE01Gene13718	2.2829	1.19087	0.00159239	0.00908067	yes	up	_
LE01Gene09816	0.220886	-2.17862	0.00159288	0.00908067	yes	down	_
LE01Gene11907	24.8564	4.63554	0.00160276	0.00912265	yes	up	RecName: Full=Aspergillopepsin-2; AltName: Full=Acid protease A; AltName: Full=Aspergillopepsin II; AltName: Full=Proctase A; Contains: RecName: Full=Aspergillopepsin
LE01Gene04636	2.60662	1.38218	0.00160549	0.00913341	yes	up	_
LE01Gene07761	2.03367	1.02409	0.00160941	0.0091461	yes	up	RecName: Full=Quinone-oxidoreductase homolog, chloroplastic; AltName: Full=ceQORH
LE01Gene08754	0.496019	-1.01153	0.00161259	0.00915695	yes	down	RecName: Full=Pumilio homology domain family member 6
LE01Gene00224	1.74063	0.799611	0.00161301	0.00915695	yes	up	_
LE01Gene00148	0.559716	-0.837234	0.00161693	0.00917442	yes	down	_
LE01Gene12295	0.545301	-0.874876	0.0016206	0.00919043	yes	down	_
LE01Gene04228	3.2741	1.7111	0.00162392	0.00920449	yes	up	RecName: Full=Linoleate 10R-lipoxygenase; AltName: Full=Cyclooxygenase-like fatty acid oxygenase; AltName: Full=Fatty acid oxygenase ppoC; AltName: Full=Linoleate
LE01Gene07155	0.552857	-0.855021	0.00162624	0.00921279	yes	down	RecName: Full=78 kDa glucose-regulated protein homolog; Short=GRP-78; AltName: Full=Immunoglobulin heavy chain-binding protein homolog; Short=BiP; Flags: Precursor
LE01Gene03383	3.49826	1.80664	0.00163182	0.00923963	yes	up	_
LE01Gene01275	0.661476	-0.596239	0.00163913	0.00927618	yes	down	RecName: Full=Eukaryotic translation initiation factor 3 subunit J; Short=eIF3j; AltName: Full=Eukaryotic translation initiation factor 3 30 kDa subunit homolog;
LE01Gene07218	0.5897	-0.761946	0.00166147	0.00939282	yes	down	_
LE01Gene05090	0.599827	-0.737383	0.00166075	0.00939282	yes	down	RecName: Full=Arabinogalactan endo-beta-1,4-galactanase A; AltName: Full=Endo-1,4-beta-galactanase A; Short=Galactanase A; Flags: Precursor
LE01Gene04830	3.05739	1.6123	0.00166382	0.00940116	yes	up	_
LE01Gene05505	0.35639	-1.48847	0.00167651	0.00946799	yes	down	_
LE01Gene05259	0.6009	-0.734802	0.00168998	0.00953412	yes	down	RecName: Full=Farnesyl pyrophosphate synthase; Short=FPP synthase; Short=FPS; AltName: Full=(2E,6E)-farnesyl diphosphate synthase; AltName: Full=Dimethylallyltranstra
LE01Gene08422	2.00491	1.00354	0.00172231	0.00970642	yes	up	_
LE01Gene09468	1.94829	0.962207	0.00172477	0.00971268	yes	up	_
LE01Gene13296	1.81296	0.858344	0.00172775	0.00972197	yes	up	_
LE01Gene13684	0.411625	-1.2806	0.0017294	0.00972595	yes	down	RecName: Full=Alpha-L-rhamnosidase rgxB; AltName: Full=Exopolygalacturonase B; AltName: Full=Exorhamnogalacturonase B; AltName: Full=Pnp-rhamnohydrolase; Flags: Pr
LE01Gene04633	1.58264	0.662332	0.00173025	0.00972595	yes	up	_
LE01Gene07225	2.36167	1.23981	0.00173316	0.00973726	yes	up	_
LE01Gene14245	0.640114	-0.643599	0.00176349	0.00990254	yes	down	_
LE01Gene14046	2.31243	1.20941	0.00176443	0.00990269	yes	up	_
LE01Gene10755	0.587352	-0.767702	0.00176631	0.0099081	yes	down	_
LE01Gene10050	0.629787	-0.667063	0.00176737	0.00990896	yes	down	RecName: Full=Probable 1,4-beta-D-glucan cellobiohydrolase C; AltName: Full=Beta-glucancellobiohydrolase C; AltName: Full=Exocellobiohydrolase C; AltName: Full=Exo
LE01Gene04347	0.521906	-0.938137	0.00177064	0.00991194	yes	down	_
LE01Gene12617	0.5889	-0.763905	0.00177713	0.00994221	yes	down	RecName: Full=26S proteasome non-ATPase regulatory subunit 6; AltName: Full=26S proteasome regulatory subunit RPN7; AltName: Full=26S proteasome regulatory subunit
LE01Gene04395	0.531342	-0.912288	0.00177788	0.00994221	yes	down	RecName: Full=6-hydroxy-D-nicotine oxidase; Short=6-HDNO
LE01Gene11498	1.72042	0.782757	0.00177944	0.00994584	yes	up	RecName: Full=Casein kinase I homolog hhp1
LE01Gene08726	0.639654	-0.644637	0.00178554	0.00997476	yes	down	RecName: Full=Mitochondrial chaperone BCS1; AltName: Full=BCS1-like protein
LE01Gene05388	0.610065	-0.712965	0.00179065	0.00999303	yes	down	RecName: Full=Ribosome biogenesis protein ERB1; AltName: Full=Eukaryotic ribosome biogenesis protein 1
LE01Gene13987	0.540052	-0.88883	0.00179318	0.010002	yes	down	_
LE01Gene08851	0.483795	-1.04753	0.00179751	0.010021	yes	down	_
LE01Gene07635	0.625825	-0.67617	0.0018093	0.0100816	yes	down	_
LE01Gene06964	0.459009	-1.12341	0.00182392	0.0101526	yes	down	_
LE01Gene00365	1.51957	0.603661	0.00183205	0.0101875	yes	up	RecName: Full=Mitochondrial intermediate peptidase; Short=MIP; AltName: Full=Octapeptidyl aminopeptidase; Flags: Precursor
LE01Gene02456	2.52898	1.33856	0.00185296	0.0102932	yes	up	RecName: Full=Acylpyruvase FAHD1, mitochondrial; AltName: Full=Fumarylacetoacetate hydrolase domain-containing protein 1; Flags: Precursor
LE01Gene01568	0.609147	-0.715137	0.00185666	0.0103085	yes	down	_
LE01Gene01729	2.23547	1.16058	0.00185875	0.0103148	yes	up	RecName: Full=Uncharacterized esterase/lipase C417.12
LE01Gene05675	3.75416	1.90849	0.00186842	0.0103589	yes	up	_
LE01Gene10738	0.632434	-0.661012	0.00186862	0.0103589	yes	down	_
LE01Gene10176	1.70772	0.77207	0.00188906	0.0104616	yes	up	RecName: Full=Peptidyl-prolyl cis-trans isomerase; Short=PPIase; AltName: Full=Cyclophilin; Short=CPH; AltName: Full=Cyclosporin A-binding protein; AltName: Full=Rota
LE01Gene01613	0.551737	-0.857948	0.00191735	0.0106075	yes	down	_
LE01Gene10747	0.547	-0.870389	0.00192287	0.0106326	yes	down	RecName: Full=Probable drug/proton antiporter YHK8
LE01Gene05273	0.499231	-1.00222	0.0019277	0.0106539	yes	down	_
LE01Gene09434	1.7567	0.812869	0.00194077	0.0107152	yes	up	RecName: Full=Putative NADPH dehydrogenase C23G7.10c; AltName: Full=Old yellow enzyme homolog 3
LE01Gene07717	0.562609	-0.829795	0.00196014	0.0108002	yes	down	RecName: Full=Oxygen-dependent choline dehydrogenase; Short=CDH; Short=CHD; AltName: Full=Betaine aldehyde dehydrogenase; Short=BADH
LE01Gene05096	0.196168	-2.34984	0.00196858	0.0108411	yes	down	RecName: Full=Condensin complex subunit 1; AltName: Full=XCAP-D2 homolog; AltName: Full=p128
LE01Gene00952	0.613021	-0.705991	0.00198148	0.0109067	yes	down	_
LE01Gene03236	0.601123	-0.734267	0.00198646	0.0109119	yes	down	RecName: Full=U3 small nucleolar ribonucleoprotein protein MPP10; AltName: Full=M phase phosphoprotein 10
LE01Gene12816	0.610509	-0.711916	0.00198616	0.0109119	yes	down	RecName: Full=Aspergillopepsin-2; AltName: Full=Acid protease A; AltName: Full=Aspergillopepsin II; AltName: Full=Proctase A; Contains: RecName: Full=Aspergillopepsin
LE01Gene05695	0.632967	-0.659797	0.00198449	0.0109119	yes	down	_
LE01Gene01755	2.58334	1.36924	0.00198853	0.0109178	yes	up	_
LE01Gene09144	0.555584	-0.847924	0.0019987	0.0109681	yes	down	_
LE01Gene04828	0.476458	-1.06958	0.00200539	0.0109937	yes	down	RecName: Full=Protein sym-1
LE01Gene00620	0.658124	-0.603569	0.00200867	0.0110062	yes	down	RecName: Full=Pyrroline-5-carboxylate reductase; Short=P5C reductase; Short=P5CR
LE01Gene11195	1.80151	0.849204	0.00205237	0.0112286	yes	up	RecName: Full=Myb-like protein L
LE01Gene02477	1.68459	0.752395	0.00206125	0.0112658	yes	up	_
LE01Gene09160	0.363499	-1.45998	0.00206758	0.0112891	yes	down	_
LE01Gene09227	0.428086	-1.22403	0.00207424	0.0113197	yes	down	_
LE01Gene03972	0.604365	-0.726509	0.00208433	0.0113577	yes	down	_
LE01Gene02524	0.647658	-0.626696	0.00210207	0.0114428	yes	down	_
LE01Gene12909	1.97409	0.981189	0.00210704	0.0114642	yes	up	RecName: Full=Trans-1,2-dihydrobenzene-1,2-diol dehydrogenase; AltName: Full=D-xylose 1-dehydrogenase; AltName: Full=D-xylose-NADP dehydrogenase; AltName: Full=Dim
LE01Gene12855	0.483523	-1.04834	0.00212161	0.0115146	yes	down	RecName: Full=Aminomethyltransferase, mitochondrial; AltName: Full=Glycine cleavage system T protein; Short=GCVT; Flags: Precursor
LE01Gene08967	1.79022	0.840137	0.002126	0.0115327	yes	up	_
LE01Gene00785	2.45962	1.29844	0.00212783	0.0115344	yes	up	_
LE01Gene03936	2.03536	1.02529	0.00214228	0.0115978	yes	up	_
LE01Gene02324	1.64679	0.719656	0.00215377	0.0116368	yes	up	RecName: Full=3-ketoacyl-CoA thiolase, peroxisomal; AltName: Full=Acetyl-CoA acyltransferase; AltName: Full=Beta-ketothiolase; AltName: Full=Peroxisomal 3-oxoacyl-CoA
LE01Gene10268	2.96344	1.56727	0.00216498	0.0116871	yes	up	_
LE01Gene05456	0.577725	-0.791545	0.00216524	0.0116871	yes	down	_
LE01Gene03948	0.000247753	-11.9788	0.00216881	0.011689	yes	down	RecName: Full=Protein GET1; AltName: Full=Guided entry of tail-anchored proteins 1
LE01Gene07880	1.63626	0.710403	0.00217538	0.0117186	yes	up	RecName: Full=Protein NAM8
LE01Gene08969	1.83264	0.873922	0.00217897	0.0117279	yes	up	_
LE01Gene13774	0.0751662	-3.73377	0.00217927	0.0117279	yes	down	_
LE01Gene14486	1.64809	0.720798	0.00218413	0.0117482	yes	up	_
LE01Gene11660	0.5735	-0.802133	0.00219032	0.0117698	yes	down	RecName: Full=Probable beta-glucosidase H; AltName: Full=Beta-D-glucoside glucohydrolase H; AltName: Full=Cellobiase H; AltName: Full=Gentiobiase H
LE01Gene13018	3.73075	1.89946	0.00218926	0.0117698	yes	up	_
LE01Gene03448	0.477012	-1.0679	0.00219938	0.0118127	yes	down	RecName: Full=Probable RNA exonuclease C9B6.11c
LE01Gene03066	1.99312	0.995029	0.00222643	0.0119461	yes	up	RecName: Full=Uncharacterized protein C11G11.07
LE01Gene00423	1.72555	0.787052	0.00224219	0.0120248	yes	up	RecName: Full=Probable uroporphyrinogen-III C-methyltransferase
LE01Gene02146	0.529624	-0.91696	0.00227103	0.0121529	yes	down	_
LE01Gene00164	0.627205	-0.672992	0.00227168	0.0121529	yes	down	RecName: Full=Protein LTV1
LE01Gene04812	0.623129	-0.682398	0.00226967	0.0121529	yes	down	RecName: Full=Probable beta-galactosidase C; AltName: Full=Lactase C; Flags: Precursor
LE01Gene11428	0.62094	-0.687474	0.00228872	0.012226	yes	down	RecName: Full=Uncharacterized membrane protein C776.05
LE01Gene01664	0.637549	-0.649392	0.00229203	0.0122377	yes	down	_
LE01Gene03859	0.606306	-0.721881	0.00229855	0.0122665	yes	down	RecName: Full=Uncharacterized protein C3F10.06c
LE01Gene11334	2.27854	1.18811	0.00230257	0.0122819	yes	up	_
LE01Gene05021	0.657589	-0.604741	0.00230598	0.012294	yes	down	RecName: Full=Inosine-5'-monophosphate dehydrogenase; Short=IMP dehydrogenase; Short=IMPD; Short=IMPDH
LE01Gene03658	0.391941	-1.35129	0.00231493	0.0123296	yes	down	RecName: Full=Phosphatidyl-N-methylethanolamine N-methyltransferase; Short=PLMT; AltName: Full=Overproducer of inositol protein 3; AltName: Full=Unsaturated phospholi
LE01Gene01037	1.59689	0.675265	0.00232336	0.0123624	yes	up	_
LE01Gene10508	2.17944	1.12396	0.00233635	0.0124255	yes	up	_
LE01Gene08908	0.538268	-0.893603	0.00234167	0.0124476	yes	down	RecName: Full=Protein sda1
LE01Gene13133	1.52112	0.605137	0.00235224	0.0124903	yes	up	_
LE01Gene00887	3.26758	1.70822	0.0023668	0.0125424	yes	up	_
LE01Gene07156	0.529988	-0.915968	0.00236713	0.0125424	yes	down	RecName: Full=Amidase
LE01Gene09075	1.81603	0.860786	0.00236759	0.0125424	yes	up	_
LE01Gene08277	0.611919	-0.708588	0.00237104	0.0125546	yes	down	RecName: Full=Probable proteasome subunit alpha type-2
LE01Gene03345	1.8999	0.925922	0.00239127	0.0126432	yes	up	_
LE01Gene02289	0.615468	-0.700244	0.00239441	0.0126537	yes	down	RecName: Full=Mitochondrial intermembrane space import and assembly protein 40; AltName: Full=Mitochondrial import inner membrane translocase TIM40; Flags: Precurs
LE01Gene02734	2.08805	1.06215	0.00242898	0.0128177	yes	up	_
LE01Gene11399	2.00222	1.0016	0.00243963	0.0128676	yes	up	_
LE01Gene07153	1.561	0.642473	0.00245897	0.012957	yes	up	_
LE01Gene14121	4.25366	2.0887	0.00246397	0.0129767	yes	up	_
LE01Gene11955	0.272294	-1.87676	0.00248051	0.0130389	yes	down	_
LE01Gene01337	0.562174	-0.83091	0.00248575	0.0130475	yes	down	RecName: Full=DNA-directed RNA polymerase I subunit rpa1; AltName: Full=DNA-directed RNA polymerase I 190 kDa polypeptide; AltName: Full=DNA-directed RNA polymerase
LE01Gene01377	0.476018	-1.07091	0.00249099	0.013067	yes	down	_
LE01Gene07645	0.506428	-0.98157	0.00249188	0.013067	yes	down	RecName: Full=Mitochondrial genome maintenance protein mgm101; Flags: Precursor
LE01Gene04766	2.01861	1.01337	0.00249827	0.0130942	yes	up	_
LE01Gene10465	0.606355	-0.721766	0.00250231	0.0131027	yes	down	RecName: Full=Putative tricarboxylate transport protein, mitochondrial; AltName: Full=Citrate transport protein; Short=CTP; Flags: Precursor
LE01Gene02266	0.476331	-1.06996	0.002506	0.0131158	yes	down	RecName: Full=Small nuclear ribonucleoprotein Sm D3; Short=Sm-D3; AltName: Full=snRNP core protein D3
LE01Gene11687	1.60886	0.686042	0.00251165	0.013139	yes	up	_
LE01Gene09570	3.51941	1.81533	0.00252191	0.0131768	yes	up	_
LE01Gene07879	0.510634	-0.969637	0.0025387	0.0132486	yes	down	_
LE01Gene14346	1.93386	0.95148	0.00254411	0.0132641	yes	up	_
LE01Gene08900	0.663035	-0.592844	0.00254538	0.0132643	yes	down	RecName: Full=Coiled-coil domain-containing protein 94
LE01Gene07278	0.556561	-0.845389	0.0025507	0.0132793	yes	down	_
LE01Gene14666	1.69749	0.763403	0.00256322	0.0133381	yes	up	_
LE01Gene08502	0.606411	-0.721632	0.00257307	0.0133829	yes	down	_
LE01Gene11094	0.386039	-1.37318	0.00259702	0.0134881	yes	down	_
LE01Gene02166	2.79654	1.48364	0.00261628	0.0135622	yes	up	_
LE01Gene11593	0.574238	-0.800278	0.0026202	0.0135761	yes	down	RecName: Full=Proteasome subunit alpha type-3, partial
LE01Gene07196	1.95736	0.968909	0.0026245	0.0135853	yes	up	_
LE01Gene07455	0.433856	-1.20471	0.00262688	0.0135912	yes	down	_
LE01Gene04499	0.386783	-1.37041	0.00266272	0.0137504	yes	down	RecName: Full=Putative sterigmatocystin biosynthesis peroxidase stcC; Flags: Precursor
LE01Gene07165	0.665502	-0.587485	0.00268095	0.0138249	yes	down	RecName: Full=CDK5 regulatory subunit-associated protein 2; AltName: Full=CDK5 activator-binding protein C48; AltName: Full=Centrosome-associated protein 215
LE01Gene02004	0.586596	-0.76956	0.00272087	0.0140107	yes	down	RecName: Full=Inorganic phosphate transport protein PHO88; AltName: Full=Phosphate metabolism protein PHO88
LE01Gene08854	0.626223	-0.675252	0.00272822	0.014022	yes	down	RecName: Full=Pyruvate dehydrogenase complex protein X component, mitochondrial; AltName: Full=Dihydrolipoamide dehydrogenase-binding protein of pyruvate dehydrogenas
LE01Gene02296	0.487641	-1.03611	0.00272572	0.014022	yes	down	_
LE01Gene01656	0.640654	-0.642383	0.00273575	0.014054	yes	down	RecName: Full=Endoplasmin homolog; AltName: Full=92 kDa phosphoprotein; AltName: Full=Glucose-regulated protein 94 homolog; Short=GRP-94 homolog; Flags: Precursor
LE01Gene00604	2.0418	1.02984	0.00278804	0.0142908	yes	up	RecName: Full=Protein AIM2; AltName: Full=Altered inheritance rate of mitochondria protein 2
LE01Gene11857	0.298284	-1.74524	0.00279063	0.0142954	yes	down	RecName: Full=DEAD-box ATP-dependent RNA helicase 25
LE01Gene12179	0.492302	-1.02239	0.00280356	0.0143549	yes	down	_
LE01Gene04624	3.6657	1.87409	0.00283831	0.0145191	yes	up	_
LE01Gene04591	1.59198	0.67082	0.00285789	0.0145881	yes	up	RecName: Full=Pyridoxal kinase; AltName: Full=Protein SALT OVERLY SENSITIVE 4; AltName: Full=Pyridoxal kinase-like protein SOS4; AltName: Full=Pyridoxine kinase
LE01Gene03468	0.452468	-1.14411	0.00287985	0.0146763	yes	down	RecName: Full=Putative glycine cleavage system H protein, mitochondrial; AltName: Full=Glycine decarboxylase complex subunit H; Flags: Precursor
LE01Gene03454	0.565857	-0.821491	0.00287892	0.0146763	yes	down	RecName: Full=50S ribosomal protein L17
LE01Gene11008	0.665453	-0.587592	0.00288138	0.0146772	yes	down	RecName: Full=Solute carrier family 35 member C2; AltName: Full=Ovarian cancer-overexpressed gene 1 protein
LE01Gene02873	1.86067	0.895819	0.00288594	0.0146935	yes	up	RecName: Full=Protein OPI10 homolog
LE01Gene05983	2.48392	1.31262	0.00289659	0.0147409	yes	up	RecName: Full=Adenosine kinase
LE01Gene06132	0.12726	-2.97414	0.0029119	0.0148049	yes	down	_
LE01Gene04034	0.197664	-2.33888	0.00293824	0.0149049	yes	down	_
LE01Gene13410	0.550951	-0.860003	0.00293663	0.0149049	yes	down	RecName: Full=N-acetyltransferase ats1
LE01Gene09850	0.65764	-0.60463	0.00294544	0.0149335	yes	down	RecName: Full=Mitochondrial 37S ribosomal protein S27
LE01Gene08520	2.03197	1.02288	0.00296024	0.0149875	yes	up	_
LE01Gene07261	0.539598	-0.890043	0.00303291	0.0153072	yes	down	RecName: Full=rRNA-processing protein UTP23; AltName: Full=U three protein 23; AltName: Full=U3 small nucleolar RNA-associated protein 23; Short=U3 snoRNA-associat
LE01Gene12349	3.60507	1.85003	0.00303326	0.0153072	yes	up	_
LE01Gene08234	0.405256	-1.30309	0.00307608	0.0154874	yes	down	_
LE01Gene07311	0.500038	-0.999892	0.00308652	0.0155327	yes	down	RecName: Full=Nucleolar protein 58
LE01Gene01080	2.19947	1.13716	0.00309852	0.0155787	yes	up	_
LE01Gene09619	0.660316	-0.598772	0.00310066	0.0155822	yes	down	RecName: Full=20S-pre-rRNA D-site endonuclease nob1; AltName: Full=Pre-rRNA-processing endonuclease nob1
LE01Gene08869	0.565625	-0.822083	0.00311323	0.0156382	yes	down	RecName: Full=Eukaryotic peptide chain release factor subunit 1; Short=Eukaryotic release factor 1; Short=eRF1
LE01Gene12406	0.657737	-0.604417	0.00314477	0.015782	yes	down	_
LE01Gene08131	2.17989	1.12425	0.00315058	0.0157963	yes	up	_
LE01Gene08815	0.528127	-0.921043	0.00315198	0.0157963	yes	down	_
LE01Gene05772	0.534534	-0.903645	0.00316263	0.0158297	yes	down	_
LE01Gene01719	2.10028	1.07058	0.00316997	0.0158474	yes	up	RecName: Full=Major myo-inositol transporter IolT
LE01Gene13578	2.03354	1.024	0.00316893	0.0158474	yes	up	RecName: Full=Alpha-amylase 1; AltName: Full=1,4-alpha-D-glucan glucanohydrolase 1; Flags: Precursor
LE01Gene02559	1.61684	0.693176	0.00319489	0.0159304	yes	up	RecName: Full=Putative lipase ATG15; AltName: Full=Autophagy-related protein 15
LE01Gene00249	0.52578	-0.927469	0.00319884	0.0159304	yes	down	_
LE01Gene08370	5.39617	2.43194	0.00319928	0.0159304	yes	up	_
LE01Gene10312	0.497558	-1.00706	0.0032158	0.0160053	yes	down	RecName: Full=Flap endonuclease 1; Short=FEN-1; AltName: Full=Flap structure-specific endonuclease 1
LE01Gene11460	0.450942	-1.14899	0.00323638	0.016093	yes	down	_
LE01Gene10656	0.489839	-1.02962	0.00324287	0.0161179	yes	down	_
LE01Gene13919	1.70457	0.769411	0.00326191	0.0162051	yes	up	_
LE01Gene10972	0.547146	-0.870002	0.00326907	0.0162281	yes	down	RecName: Full=Structure-specific endonuclease subunit SLX1 SLX1_CRYNJ RecName: Full=Structure-specific endonuclease subunit SLX1
LE01Gene10543	1.95614	0.968008	0.00326953	0.0162281	yes	up	RecName: Full=Uncharacterized vacuolar membrane protein YGR125W
LE01Gene07212	0.388509	-1.36398	0.00328443	0.0162927	yes	down	RecName: Full=Pentachlorophenol 4-monooxygenase; AltName: Full=Pentachlorophenol hydroxylase
LE01Gene10245	3.70376	1.88899	0.00328554	0.0162927	yes	up	RecName: Full=Cyclopentanone 1,2-monooxygenase; Short=CPMO
LE01Gene01179	4.12272	2.0436	0.00330212	0.0163674	yes	up	_
LE01Gene12711	0.5957	-0.747341	0.00330934	0.0163957	yes	down	RecName: Full=Ubiquitin carboxyl-terminal hydrolase 6; AltName: Full=Deubiquitinating enzyme 6; Short=AtUBP6; AltName: Full=Ubiquitin thioesterase 6; AltName: Full=
LE01Gene10910	1.50881	0.59341	0.00331645	0.0164234	yes	up	RecName: Full=Copper-transporting ATPase 2; AltName: Full=Copper pump 2; AltName: Full=Wilson disease-associated protein homolog
LE01Gene09147	0.590913	-0.758983	0.0033311	0.016481	yes	down	RecName: Full=Oxygen-dependent choline dehydrogenase; Short=CDH; Short=CHD; AltName: Full=Betaine aldehyde dehydrogenase; Short=BADH
LE01Gene00404	2.45342	1.2948	0.00334055	0.0165202	yes	up	_
LE01Gene07685	0.51564	-0.955565	0.00341326	0.0168608	yes	down	_
LE01Gene03999	0.611515	-0.709541	0.00341408	0.0168608	yes	down	_
LE01Gene13238	1.97212	0.979748	0.00342654	0.0168973	yes	up	_
LE01Gene10135	0.649643	-0.622281	0.00343363	0.0169189	yes	down	RecName: Full=Anaphase-promoting complex subunit 8; AltName: Full=20S cyclosome/APC complex protein apc8; AltName: Full=Cell untimely torn protein 23
LE01Gene11867	1.75325	0.810028	0.00344569	0.0169629	yes	up	RecName: Full=3-hydroxyanthranilate 3,4-dioxygenase; AltName: Full=3-hydroxyanthranilate oxygenase; Short=3-HAO; AltName: Full=3-hydroxyanthranilic acid dioxygenas
LE01Gene06400	0.599917	-0.737165	0.0034906	0.0171297	yes	down	RecName: Full=Hypoxia up-regulated protein 1; Flags: Precursor
LE01Gene11793	3.08599	1.62573	0.00348991	0.0171297	yes	up	RecName: Full=Tripeptidyl-peptidase sed3; AltName: Full=Sedolisin-C; Flags: Precursor
LE01Gene06583	0.656552	-0.607019	0.00349778	0.0171571	yes	down	RecName: Full=D-arabinitol 2-dehydrogenase
LE01Gene11490	1.91078	0.934165	0.00350107	0.0171655	yes	up	_
LE01Gene11761	0.534726	-0.903128	0.00351431	0.0172226	yes	down	RecName: Full=Amino-acid transporter arg-13
LE01Gene05989	1.62426	0.699781	0.0035734	0.0174807	yes	up	_
LE01Gene13271	1.5779	0.658003	0.00358149	0.0175124	yes	up	_
LE01Gene05823	14.3932	3.84732	0.0036343	0.0177307	yes	up	RecName: Full=Carboxypeptidase S1
LE01Gene00937	0.556197	-0.846331	0.00363282	0.0177307	yes	down	_
LE01Gene06554	0.588809	-0.764128	0.00363175	0.0177307	yes	down	RecName: Full=Peroxiredoxin; AltName: Full=AsPrx; AltName: Full=Thioredoxin peroxidase
LE01Gene02370	0.0191339	-5.70772	0.00365025	0.0178005	yes	down	_
LE01Gene04652	1.50598	0.590701	0.00365766	0.0178206	yes	up	_
LE01Gene06990	2.68303	1.42387	0.00365743	0.0178206	yes	up	_
LE01Gene01059	2.32075	1.21459	0.00366721	0.0178591	yes	up	_
LE01Gene10998	1.88897	0.917597	0.00367255	0.0178771	yes	up	RecName: Full=Protein VTS1
LE01Gene07384	0.530648	-0.914172	0.00370351	0.0180001	yes	down	RecName: Full=C-8 sterol isomerase; AltName: Full=Delta-8--delta-7 sterol isomerase
LE01Gene01929	1.9489	0.96266	0.0037255	0.0180904	yes	up	_
LE01Gene01209	0.623932	-0.680539	0.00372636	0.0180904	yes	down	RecName: Full=Phosphatidylserine decarboxylase proenzyme 1, mitochondrial; Contains: RecName: Full=Phosphatidylserine decarboxylase 1 beta chain; Contains: RecName
LE01Gene10547	1.79755	0.846035	0.00374341	0.0181489	yes	up	_
LE01Gene13570	0.523907	-0.932616	0.00376953	0.0182592	yes	down	_
LE01Gene08161	1.58375	0.663347	0.00379662	0.0183413	yes	up	_
LE01Gene01307	2.24355	1.16578	0.00379409	0.0183413	yes	up	RecName: Full=Cytochrome P450 2U1
LE01Gene07277	1.62093	0.69682	0.00383352	0.0185113	yes	up	RecName: Full=Guanine exchange factor for Rac 30
LE01Gene01008	1.85069	0.888061	0.00384082	0.0185384	yes	up	_
LE01Gene01633	2.18311	1.12638	0.00385959	0.0186041	yes	up	RecName: Full=Chitin deacetylase; Flags: Precursor
LE01Gene11373	0.509299	-0.973415	0.00388633	0.0186871	yes	down	RecName: Full=Tritrans,polycis-undecaprenyl-diphosphate synthase (geranylgeranyl-diphosphate specific); AltName: Full=Undecaprenyl diphosphate synthase; Short=UDS;
LE01Gene06679	2.07155	1.05071	0.00388378	0.0186871	yes	up	_
LE01Gene06087	0.658861	-0.601955	0.00388391	0.0186871	yes	down	_
LE01Gene10708	0.594939	-0.749187	0.00392174	0.018824	yes	down	RecName: Full=26S proteasome non-ATPase regulatory subunit 2 homolog A; AltName: Full=26S proteasome regulatory subunit RPN1a; Short=AtRPN1a; AltName: Full=26S pro
LE01Gene03016	0.388765	-1.36303	0.00393458	0.0188568	yes	down	_
LE01Gene11539	0.440568	-1.18256	0.00393332	0.0188568	yes	down	_
LE01Gene06804	0.629994	-0.666589	0.0039522	0.018909	yes	down	RecName: Full=Probable rRNA-processing protein ebp2
LE01Gene01343	0.597252	-0.743588	0.00395243	0.018909	yes	down	RecName: Full=Pre-mRNA-splicing factor sap61; AltName: Full=Spliceosome-associated protein 61
LE01Gene09298	9.96378	3.31669	0.00398358	0.0190496	yes	up	_
LE01Gene04621	2.02282	1.01636	0.00402348	0.019215	yes	up	_
LE01Gene14068	0.516932	-0.951952	0.00402719	0.0192243	yes	down	RecName: Full=Protein mago nashi homolog
LE01Gene11808	0.608785	-0.715994	0.00404167	0.0192849	yes	down	RecName: Full=Probable 26S protease subunit rpt4
LE01Gene02126	0.613137	-0.70572	0.00406187	0.019366	yes	down	_
LE01Gene11913	0.524683	-0.930483	0.00407356	0.019403	yes	down	RecName: Full=AdoMet-dependent rRNA methyltransferase SPB1; AltName: Full=2'-O-ribose RNA methyltransferase; AltName: Full=S-adenosyl-L-methionine-dependent methyl
LE01Gene11413	0.611426	-0.709749	0.00407217	0.019403	yes	down	_
LE01Gene04486	1.65208	0.72428	0.00407617	0.0194069	yes	up	_
LE01Gene05798	0.630646	-0.665099	0.00414486	0.0196994	yes	down	_
LE01Gene10155	0.630139	-0.666259	0.00417594	0.0198298	yes	down	RecName: Full=Proteasome subunit beta type-6; AltName: Full=Multicatalytic endopeptidase complex subunit C5; AltName: Full=Proteasome component C5; Flags: Precursor
LE01Gene02706	0.643986	-0.634899	0.00420192	0.019927	yes	down	RecName: Full=Cytochrome P450 11B, mitochondrial; AltName: Full=CYPXIB; AltName: Full=Cytochrome P450C11; AltName: Full=P-450(11 beta,aldo); AltName: Full=Steroid 1
LE01Gene04946	0.441892	-1.17823	0.00421948	0.0199928	yes	down	RecName: Full=Probable pectate lyase A; Flags: Precursor
LE01Gene00848	0.471299	-1.08529	0.00425324	0.0201264	yes	down	RecName: Full=O-acetylhomoserine (thiol)-lyase; AltName: Full=Homocysteine synthase; AltName: Full=O-acetylhomoserine sulfhydrylase; Short=OAH sulfhydrylase
LE01Gene13265	2.33747	1.22495	0.00425718	0.0201276	yes	up	_
LE01Gene08162	1.82347	0.866688	0.00425612	0.0201276	yes	up	_
LE01Gene02704	1.5833	0.662931	0.00426865	0.020173	yes	up	_
LE01Gene11394	0.562225	-0.83078	0.0043003	0.0203137	yes	down	RecName: Full=Sterol-4-alpha-carboxylate 3-dehydrogenase, decarboxylating
LE01Gene03616	1.71318	0.776674	0.00432947	0.0204249	yes	up	_
LE01Gene09776	0.564186	-0.825757	0.00432715	0.0204249	yes	down	RecName: Full=L-lactate dehydrogenase
LE01Gene02520	0.588001	-0.76611	0.00434715	0.0204905	yes	down	_
LE01Gene03651	2.21352	1.14634	0.00437764	0.0206074	yes	up	_
LE01Gene03100	1.58131	0.661118	0.00438779	0.0206372	yes	up	_
LE01Gene06247	2.20283	1.13936	0.0043937	0.0206472	yes	up	_
LE01Gene09456	1.84165	0.881	0.0043992	0.0206641	yes	up	_
LE01Gene04836	3.36024	1.74857	0.00440688	0.0206853	yes	up	RecName: Full=Oxygen-dependent choline dehydrogenase; Short=CDH; Short=CHD
LE01Gene02426	0.666233	-0.585902	0.0044418	0.0208281	yes	down	_
LE01Gene12113	3.3753	1.75502	0.00453319	0.0211835	yes	up	_
LE01Gene04954	0.544759	-0.876309	0.00455399	0.0212441	yes	down	RecName: Full=Probable nucleolar GTP-binding protein 1
LE01Gene06735	0.223546	-2.16135	0.00457318	0.0213062	yes	down	_
LE01Gene00237	0.39539	-1.33865	0.00457604	0.0213104	yes	down	RecName: Full=60S acidic ribosomal protein P1; AltName: Full=Allergen Cla h XII; AltName: Allergen=Cla h 12
LE01Gene05116	1.55601	0.637853	0.00457818	0.0213112	yes	up	RecName: Full=Peroxisomal multifunctional enzyme type 2; Short=DmMFE-2; Includes: RecName: Full=(3R)-hydroxyacyl-CoA dehydrogenase; Includes: RecName: Full=Enoyl-Co
LE01Gene07484	2.91839	1.54517	0.00460491	0.0214173	yes	up	_
LE01Gene12185	4.7139	2.23692	0.00461422	0.0214344	yes	up	RecName: Full=Polyporopepsin; AltName: Full=Aspartic proteinase
LE01Gene10589	1.74896	0.806494	0.00461451	0.0214344	yes	up	_
LE01Gene01361	0.581515	-0.782112	0.00461166	0.0214344	yes	down	RecName: Full=Laccase-4; AltName: Full=Benzenediol:oxygen oxidoreductase 4; AltName: Full=Diphenol oxidase 4; AltName: Full=Urishiol oxidase 4; Flags: Precursor
LE01Gene07753	1.68783	0.755169	0.00462156	0.0214488	yes	up	RecName: Full=Oxygen-dependent choline dehydrogenase; Short=CDH; Short=CHD; AltName: Full=Betaine aldehyde dehydrogenase; Short=BADH
LE01Gene12298	0.532838	-0.908232	0.00462573	0.021459	yes	down	_
LE01Gene03867	0.152398	-2.71408	0.00463087	0.02146	yes	down	_
LE01Gene08838	0.651768	-0.617569	0.00463189	0.02146	yes	down	RecName: Full=Neuroguidin-A; AltName: Full=EIF4E-binding protein A
LE01Gene04744	1.75015	0.807479	0.00464878	0.0215291	yes	up	_
LE01Gene00537	1.5861	0.66548	0.00469931	0.0217353	yes	up	RecName: Full=NAD-dependent protein deacetylase hst4; AltName: Full=Homologous to SIR2 protein 4; AltName: Full=Regulatory protein SIR2 homolog 4
LE01Gene12080	0.273686	-1.86941	0.00470221	0.0217395	yes	down	_
LE01Gene11956	0.564633	-0.824614	0.00473845	0.021879	yes	down	RecName: Full=Uncharacterized oxidoreductase C736.13
LE01Gene01511	1.66527	0.735755	0.0047803	0.0220442	yes	up	_
LE01Gene01429	0.640416	-0.64292	0.00479683	0.022111	yes	down	RecName: Full=ADP-ribosylation factor
LE01Gene00953	0.56199	-0.831384	0.0048418	0.0222858	yes	down	RecName: Full=Putative enoyl reductase C646.07c
LE01Gene00309	0.582932	-0.7786	0.00484296	0.0222858	yes	down	RecName: Full=Elongation factor Ts, mitochondrial; Short=EF-Ts; Short=EF-TsMt; Flags: Precursor
LE01Gene11557	0.591146	-0.758414	0.00484556	0.0222883	yes	down	_
LE01Gene03916	1.59641	0.674827	0.00490066	0.0225132	yes	up	RecName: Full=Mei4-dependent protein 6
LE01Gene00691	0.643377	-0.636264	0.00491046	0.0225391	yes	down	RecName: Full=Exosome complex component MTR3; AltName: Full=Exosome component 6; AltName: Full=mRNA transport regulator 3 homolog
LE01Gene12013	1.55946	0.641043	0.00492725	0.02259	yes	up	RecName: Full=Benzoate 4-monooxygenase; AltName: Full=Benzoate-para-hydroxylase; Short=BpH; AltName: Full=Cytochrome P450 53
LE01Gene00486	0.664085	-0.590561	0.00495659	0.0226742	yes	down	RecName: Full=Ceramide glucosyltransferase; AltName: Full=GLCT-1; AltName: Full=Glucosylceramide synthase; Short=GCS; AltName: Full=UDP-glucose ceramide glucosyltran
LE01Gene12297	2.76368	1.46659	0.00495109	0.0226742	yes	up	_
LE01Gene12530	0.649467	-0.622672	0.00497024	0.0227079	yes	down	_
LE01Gene10433	0.639578	-0.644807	0.00496926	0.0227079	yes	down	_
LE01Gene11206	0.546785	-0.870955	0.00501029	0.0228621	yes	down	RecName: Full=Histone H3.v1
LE01Gene03938	0.577248	-0.792737	0.00502171	0.0229046	yes	down	_
LE01Gene08079	0.657769	-0.604346	0.00506873	0.023071	yes	down	RecName: Full=DNA-directed RNA polymerase II subunit rpb7; Short=RNA polymerase II subunit B7
LE01Gene07349	3.80898	1.9294	0.00508415	0.0231311	yes	up	RecName: Full=Aspergillopepsin-2; AltName: Full=Acid protease A; AltName: Full=Aspergillopepsin II; AltName: Full=Proctase A; Contains: RecName: Full=Aspergillopepsin
LE01Gene00830	0.533623	-0.906107	0.00509217	0.0231579	yes	down	RecName: Full=Ribosome biogenesis protein RLP24
LE01Gene04713	0.553433	-0.853519	0.00509667	0.0231629	yes	down	_
LE01Gene11929	3.29447	1.72005	0.00509753	0.0231629	yes	up	_
LE01Gene08163	1.68179	0.749999	0.00511759	0.0232345	yes	up	_
LE01Gene02701	1.64323	0.716535	0.00520591	0.0235764	yes	up	_
LE01Gene06058	1.75954	0.815197	0.00520453	0.0235764	yes	up	_
LE01Gene05469	0.584445	-0.774861	0.00523319	0.02369	yes	down	_
LE01Gene12699	1.67225	0.741789	0.00524601	0.0237184	yes	up	RecName: Full=Probable serine/threonine-protein kinase gdt9; AltName: Full=Growth-differentiation transition protein 9; AltName: Full=Protein kinase Dusty; Flags:
LE01Gene01422	1.99172	0.994018	0.00525719	0.0237591	yes	up	RecName: Full=Nicotinate-nucleotide pyrophosphorylase
LE01Gene10203	1.71444	0.777734	0.00530421	0.0239417	yes	up	_
LE01Gene13890	0.352897	-1.50268	0.00530954	0.0239558	yes	down	RecName: Full=60S ribosomal protein L29; AltName: Full=L43
LE01Gene07495	0.506136	-0.982403	0.00531655	0.0239618	yes	down	RecName: Full=Alcohol dehydrogenase 3; AltName: Full=Alcohol dehydrogenase III; Short=ADH III
LE01Gene00450	0.646943	-0.628289	0.00533652	0.0240233	yes	down	RecName: Full=Syntaxin-5
LE01Gene09729	0.532467	-0.909237	0.00533648	0.0240233	yes	down	_
LE01Gene03093	0.550826	-0.860332	0.00535443	0.0240783	yes	down	RecName: Full=D-3-phosphoglycerate dehydrogenase 2; Short=3-PGDH 2
LE01Gene06512	1.91277	0.935664	0.0053576	0.0240826	yes	up	RecName: Full=Diacetyl reductase
LE01Gene03853	1.79402	0.843193	0.00543161	0.024385	yes	up	_
LE01Gene00364	0.636068	-0.652748	0.00548825	0.0246087	yes	down	_
LE01Gene10827	0.58838	-0.765181	0.00549323	0.0246209	yes	down	RecName: Full=tRNA ligase 1
LE01Gene08658	1.76666	0.821021	0.0054972	0.0246285	yes	up	_
LE01Gene03401	0.658696	-0.602315	0.0055069	0.0246618	yes	down	RecName: Full=Uncharacterized helicase C15C4.05
LE01Gene09381	0.626679	-0.674201	0.00553813	0.0247812	yes	down	RecName: Full=UDP-galactose transporter homolog 1
LE01Gene02379	0.502653	-0.992364	0.00560662	0.0250361	yes	down	RecName: Full=H/ACA ribonucleoprotein complex subunit 1; AltName: Full=snoRNP protein GAR1
LE01Gene07044	3.587	1.84278	0.00562813	0.0251219	yes	up	_
LE01Gene10314	1.8618	0.896698	0.00563527	0.0251434	yes	up	RecName: Full=ATP-dependent RNA helicase DBP2-A DBP2_CRYNJ RecName: Full=ATP-dependent RNA helicase DBP2-A
LE01Gene07823	3.19508	1.67585	0.00564833	0.0251913	yes	up	RecName: Full=Dynein heavy chain, cytoplasmic; AltName: Full=Dynein heavy chain, cytosolic; Short=DYHC
LE01Gene08839	0.654589	-0.611339	0.00570177	0.0254088	yes	down	RecName: Full=Histone acetyltransferase type B catalytic subunit HAT1_CRYNJ RecName: Full=Histone acetyltransferase type B catalytic subun
LE01Gene04410	9.70073	3.27809	0.0057122	0.0254448	yes	up	_
LE01Gene09736	1.68437	0.752205	0.00582647	0.0258478	yes	up	_
LE01Gene03881	0.491766	-1.02396	0.0058298	0.025852	yes	down	RecName: Full=Carbamoyl-phosphate synthase arginine-specific large chain; AltName: Full=Arginine-specific carbamoyl-phosphate synthetase, ammonia chain
LE01Gene05605	0.139695	-2.83965	0.00584186	0.0258949	yes	down	_
LE01Gene11635	2.49597	1.3196	0.00586049	0.0259563	yes	up	_
LE01Gene11767	0.317498	-1.65518	0.00587492	0.0259899	yes	down	_
LE01Gene04245	1.80628	0.853018	0.00587524	0.0259899	yes	up	RecName: Full=Peroxisomal catalase; AltName: Full=PXP-9
LE01Gene03308	2.62162	1.39046	0.00593637	0.0262389	yes	up	_
LE01Gene10818	0.658034	-0.603767	0.00595849	0.026326	yes	down	RecName: Full=ATP-dependent DNA helicase Q1; AltName: Full=DNA helicase, RecQ-like type 1; Short=RecQ1; AltName: Full=DNA-dependent ATPase Q1; AltName: Full=RecQ
LE01Gene13005	0.550298	-0.861714	0.00597983	0.0264095	yes	down	RecName: Full=ATP-dependent RNA helicase eIF4A; AltName: Full=Eukaryotic initiation factor 4A; Short=eIF-4A; AltName: Full=Translation initiation factor 1
LE01Gene06415	2.12221	1.08557	0.00599395	0.0264503	yes	up	RecName: Full=Acid phosphatase; Flags: Precursor
LE01Gene10037	1.64775	0.720501	0.00601761	0.0265439	yes	up	_
LE01Gene10328	0.605882	-0.722891	0.00602507	0.0265553	yes	down	RecName: Full=Peptidyl-prolyl cis-trans isomerase cyp11; Short=PPIase cyp11; AltName: Full=Cyclophilin cyp11; AltName: Full=Rotamase cyp11
LE01Gene12271	2.56082	1.35661	0.0060312	0.0265715	yes	up	_
LE01Gene05496	1.51738	0.601582	0.00604693	0.0266192	yes	up	RecName: Full=AMMECR1-like protein
LE01Gene05950	2.89195	1.53204	0.00606577	0.0266914	yes	up	_
LE01Gene06466	2.28622	1.19297	0.00606824	0.0266914	yes	up	_
LE01Gene13701	0.523352	-0.934147	0.00609207	0.0267746	yes	down	_
LE01Gene02237	0.535295	-0.901594	0.00611309	0.0268452	yes	down	RecName: Full=ATP-dependent RNA helicase DBP10
LE01Gene04684	1.76614	0.820599	0.00612217	0.0268742	yes	up	RecName: Full=Uncharacterized mitochondrial protein AtMg00860; AltName: Full=ORF158 (mitochondrion)
LE01Gene08253	0.636355	-0.652097	0.00613437	0.0269169	yes	down	_
LE01Gene08703	1.52113	0.605143	0.00613802	0.026922	yes	up	_
LE01Gene01532	0.477072	-1.06772	0.00618106	0.027078	yes	down	RecName: Full=Histone H3.3C
LE01Gene04546	0.30338	-1.7208	0.006193	0.0271193	yes	down	_
LE01Gene06228	0.499299	-1.00202	0.00620295	0.027141	yes	down	RecName: Full=Glucan endo-1,3-alpha-glucosidase agn1; AltName: Full=Endo-1,3-alpha-glucanase agn1; Flags: Precursor
LE01Gene11250	4.057	2.02041	0.00621002	0.027161	yes	up	_
LE01Gene11152	0.503703	-0.989356	0.00621543	0.0271738	yes	down	_
LE01Gene07162	2.3865	1.2549	0.00622093	0.0271869	yes	up	RecName: Full=Glyoxal reductase; Short=GR; AltName: Full=Methylglyoxal reductase
LE01Gene10094	1.79446	0.843547	0.00625364	0.0273188	yes	up	_
LE01Gene11038	0.45559	-1.13419	0.00626136	0.0273415	yes	down	RecName: Full=10 kDa heat shock protein, mitochondrial; Short=HSP10; AltName: Full=10 kDa chaperonin
LE01Gene06028	0.564889	-0.823962	0.00627201	0.027377	yes	down	RecName: Full=Serine-rich adhesin for platelets; AltName: Full=Staphylococcus aureus surface protein A; Flags: Precursor
LE01Gene07200	0.339428	-1.55882	0.00628825	0.0274149	yes	down	_
LE01Gene04817	1.66941	0.739341	0.00630951	0.0274965	yes	up	RecName: Full=3'(2'),5'-bisphosphate nucleotidase; AltName: Full=3'(2'),5-bisphosphonucleoside 3'(2')-phosphohydrolase; AltName: Full=DPNPase; AltName: Full=Halotol
LE01Gene10041	0.640112	-0.643604	0.00632288	0.0275437	yes	down	_
LE01Gene13243	2.37585	1.24844	0.0063289	0.0275589	yes	up	_
LE01Gene01001	0.501814	-0.994776	0.00633948	0.0275828	yes	down	_
LE01Gene05774	0.415539	-1.26694	0.0063528	0.0276156	yes	down	RecName: Full=Zuotin; AltName: Full=DnaJ-related protein zuo1; Short=J protein zuo1; AltName: Full=Ribosome-associated complex subunit zuo1
LE01Gene09396	1.60806	0.685323	0.00635463	0.0276156	yes	up	RecName: Full=6-hydroxynicotinate 3-monooxygenase; Short=6HNA monooxygenase; AltName: Full=Nicotinate degradation protein C; Flags: Precursor
LE01Gene10154	1.60063	0.678637	0.00635428	0.0276156	yes	up	RecName: Full=Carboxypeptidase S1
LE01Gene07056	1.70696	0.771432	0.00638718	0.0277126	yes	up	RecName: Full=Laccase-4; AltName: Full=Benzenediol:oxygen oxidoreductase 4; AltName: Full=Diphenol oxidase 4; AltName: Full=Urishiol oxidase 4; Flags: Precursor
LE01Gene07295	0.620304	-0.688953	0.00639296	0.0277267	yes	down	_
LE01Gene03402	0.660941	-0.597407	0.00640106	0.0277507	yes	down	RecName: Full=Cytochrome P450 71A27
LE01Gene12904	0.385727	-1.37435	0.00640685	0.0277647	yes	down	RecName: Full=60S ribosomal protein L37a
LE01Gene03784	1.79852	0.846808	0.00642265	0.027811	yes	up	_
LE01Gene07247	0.579999	-0.785877	0.00650205	0.028105	yes	down	RecName: Full=Pescadillo homolog; AltName: Full=Nucleolar protein 7 homolog
LE01Gene04535	2.20286	1.13938	0.00649841	0.028105	yes	up	_
LE01Gene10309	0.554038	-0.851943	0.00654003	0.0282292	yes	down	RecName: Full=37S ribosomal protein S10, mitochondrial; AltName: Full=Mitochondrial ribosomal small subunit protein 10; Flags: Precursor R
LE01Gene01934	0.626193	-0.675322	0.00654309	0.0282312	yes	down	RecName: Full=Serine/threonine-protein phosphatase 5; Short=PP5; AltName: Full=Protein phosphatase T; Short=PPT
LE01Gene12265	6.21877	2.63663	0.00655709	0.0282804	yes	up	_
LE01Gene10727	0.542757	-0.88162	0.00659066	0.0284026	yes	down	_
LE01Gene03005	1.58959	0.668659	0.00660399	0.0284487	yes	up	_
LE01Gene12032	1.64891	0.721512	0.00664164	0.0285769	yes	up	RecName: Full=Probable quinone oxidoreductase; AltName: Full=NADPH:quinone reductase
LE01Gene11776	0.63761	-0.649253	0.00665284	0.0286025	yes	down	RecName: Full=Isoleucine--tRNA ligase, mitochondrial; AltName: Full=Isoleucyl-tRNA synthetase; Short=IleRS; Flags: Precursor
LE01Gene01754	102.867	6.68464	0.00668141	0.0287026	yes	up	_
LE01Gene14624	5.73039	2.51863	0.00671749	0.0287887	yes	up	_
LE01Gene02517	0.584391	-0.774993	0.00671603	0.0287887	yes	down	_
LE01Gene06023	0.455204	-1.13541	0.00672119	0.0287887	yes	down	RecName: Full=Ketol-acid reductoisomerase, mitochondrial; AltName: Full=Acetohydroxy-acid reductoisomerase; AltName: Full=Alpha-keto-beta-hydroxylacyl reductoisomer
LE01Gene00644	0.485382	-1.04281	0.00672586	0.028791	yes	down	RecName: Full=Protein ATP12, mitochondrial; Flags: Precursor
LE01Gene08391	2.00581	1.00418	0.0067592	0.028911	yes	up	_
LE01Gene07856	0.645498	-0.631515	0.00676958	0.0289439	yes	down	_
LE01Gene06166	0.616043	-0.698898	0.0067759	0.0289482	yes	down	RecName: Full=Proteasome subunit alpha type-7; AltName: Full=Proteasome subunit alpha 4
LE01Gene04576	2.29228	1.19678	0.00679366	0.028983	yes	up	_
LE01Gene08933	0.662044	-0.595002	0.006789	0.028983	yes	down	RecName: Full=Uncharacterized mitochondrial carrier C688.09
LE01Gene04792	1.58824	0.667431	0.00685461	0.0291811	yes	up	RecName: Full=Gluconate transport inducer 1
LE01Gene05852	2.65012	1.40605	0.00686733	0.0292124	yes	up	_
LE01Gene03819	1.57582	0.656107	0.00688736	0.0292747	yes	up	_
LE01Gene04876	0.665839	-0.586756	0.00691097	0.0293635	yes	down	RecName: Full=Eukaryotic translation initiation factor 3 subunit M; Short=eIF3m
LE01Gene00208	0.662739	-0.593487	0.0069278	0.0294235	yes	down	RecName: Full=DNA repair protein RAD5
LE01Gene08401	0.626463	-0.674699	0.00698085	0.0296344	yes	down	RecName: Full=Probable 37S ribosomal protein S5, mitochondrial
LE01Gene04709	2.64746	1.40461	0.00698369	0.0296344	yes	up	_
LE01Gene01614	1.56125	0.642706	0.00698565	0.0296344	yes	up	RecName: Full=Pheromone-regulated membrane protein 10
LE01Gene03652	1.62446	0.699963	0.00699222	0.0296507	yes	up	_
LE01Gene04688	0.619188	-0.69155	0.00699915	0.0296579	yes	down	_
LE01Gene11166	3.22722	1.69029	0.00699938	0.0296579	yes	up	_
LE01Gene08284	0.582116	-0.780622	0.00701509	0.0297129	yes	down	_
LE01Gene14316	2.22536	1.15404	0.00708337	0.0299204	yes	up	_
LE01Gene06295	1.77725	0.829643	0.0070939	0.0299532	yes	up	_
LE01Gene00776	1.55501	0.636921	0.00711903	0.0300171	yes	up	RecName: Full=Cell wall alpha-1,3-glucan synthase mok13
LE01Gene05499	0.539403	-0.890563	0.00712007	0.0300171	yes	down	RecName: Full=54S ribosomal protein L12, mitochondrial; AltName: Full=Mitochondrial-nucleoid protein 1; Flags: Precursor
LE01Gene12972	1.57239	0.652958	0.00716117	0.0301319	yes	up	_
LE01Gene07631	2.74777	1.45826	0.00719539	0.0302524	yes	up	_
LE01Gene12429	0.0198212	-5.65681	0.00721772	0.0303228	yes	down	RecName: Full=Fumitremorgin C synthase; AltName: Full=Fumitremorgin biosynthesis protein E
LE01Gene13409	0.559276	-0.838368	0.00721632	0.0303228	yes	down	RecName: Full=Nascent polypeptide-associated complex subunit beta; Short=NAC-beta; AltName: Full=Beta-NAC
LE01Gene01447	2.2975	1.20006	0.00723435	0.0303646	yes	up	_
LE01Gene08519	2.19886	1.13675	0.00727374	0.0304874	yes	up	RecName: Full=Biofilm and cell wall regulator 1
LE01Gene05610	0.592058	-0.756189	0.0072809	0.0304938	yes	down	RecName: Full=Translation initiation factor IF-2, mitochondrial; Short=IF-2(Mt); Short=IF-2Mt; Short=IF2(mt); Flags: Precursor
LE01Gene04577	1.87753	0.908834	0.00728059	0.0304938	yes	up	_
LE01Gene05964	1.81964	0.863657	0.00728745	0.0305088	yes	up	RecName: Full=Zinc finger C2H2 protein ECU08_0560
LE01Gene03425	2.60407	1.38077	0.00733405	0.0306455	yes	up	RecName: Full=Vacuolar fusion protein MON1
LE01Gene05527	0.569084	-0.813286	0.00735393	0.0307024	yes	down	_
LE01Gene06741	1.82652	0.869095	0.0073594	0.0307042	yes	up	_
LE01Gene00847	0.553462	-0.853443	0.00743351	0.0309658	yes	down	RecName: Full=Probable cytokinin riboside 5'-monophosphate phosphoribohydrolase LOGL8; AltName: Full=Protein LONELY GUY-like 8
LE01Gene12992	2.31711	1.21233	0.0074388	0.030976	yes	up	_
LE01Gene02808	0.0835083	-3.58194	0.00745214	0.0310197	yes	down	_
LE01Gene01937	0.624777	-0.678587	0.00748417	0.031141	yes	down	RecName: Full=Sulfate adenylyltransferase; AltName: Full=ATP-sulfurylase; AltName: Full=Sulfate adenylate transferase; Short=SAT
LE01Gene10521	0.635811	-0.65333	0.00753681	0.0313436	yes	down	RecName: Full=Mitogen-activated protein kinase 2; AltName: Full=PCM
LE01Gene12268	1.72423	0.785949	0.00757655	0.0314892	yes	up	_
LE01Gene04016	2.65068	1.40636	0.00758064	0.0314942	yes	up	_
LE01Gene11269	0.57066	-0.809297	0.00760977	0.0315548	yes	down	RecName: Full=DNA-directed RNA polymerases I and III subunit RPAC2; Short=RNA polymerases I and III subunit AC2; AltName: Full=AC19; AltName: Full=DNA-directed RNA
LE01Gene02826	2.82146	1.49644	0.00760692	0.0315548	yes	up	_
LE01Gene01244	2.12153	1.0851	0.00761413	0.0315607	yes	up	_
LE01Gene05045	2.74378	1.45616	0.00765731	0.0316794	yes	up	_
LE01Gene10505	0.546078	-0.87282	0.00766451	0.0316971	yes	down	_
LE01Gene11015	2.06791	1.04817	0.00768099	0.0317532	yes	up	_
LE01Gene03490	0.602328	-0.73138	0.00769888	0.0318029	yes	down	RecName: Full=Proteasome subunit beta type-4; Flags: Precursor
LE01Gene12021	1.64596	0.718929	0.00772092	0.0318587	yes	up	_
LE01Gene09604	1.85428	0.89086	0.00775718	0.0319829	yes	up	_
LE01Gene04661	1.83597	0.876539	0.00776755	0.0320135	yes	up	RecName: Full=Probable succinate dehydrogenase
LE01Gene00931	1.75566	0.81201	0.00779878	0.0321178	yes	up	_
LE01Gene13374	0.513839	-0.960613	0.00780866	0.0321463	yes	down	RecName: Full=Chaperone protein DnaK; AltName: Full=HSP70; AltName: Full=Heat shock 70 kDa protein; AltName: Full=Heat shock protein 70
LE01Gene00102	1.52976	0.613306	0.00781474	0.0321592	yes	up	_
LE01Gene02510	0.621353	-0.686515	0.0078729	0.0323617	yes	down	_
LE01Gene02225	0.584932	-0.77366	0.00787988	0.0323782	yes	down	RecName: Full=ABC1 family protein C15C4.02
LE01Gene11921	2.78095	1.47558	0.00788784	0.0323986	yes	up	_
LE01Gene01999	0.622836	-0.683076	0.00795888	0.0326081	yes	down	RecName: Full=Probable UTP--glucose-1-phosphate uridylyltransferase; AltName: Full=UDP-glucose pyrophosphorylase; Short=UDPGP; Short=UGPase
LE01Gene12481	0.605848	-0.722971	0.00796598	0.0326086	yes	down	_
LE01Gene11500	0.369346	-1.43695	0.00796397	0.0326086	yes	down	RecName: Full=40S ribosomal protein S12
LE01Gene10592	1.84746	0.885544	0.00799297	0.0326821	yes	up	_
LE01Gene03890	0.601832	-0.732567	0.00799726	0.0326874	yes	down	_
LE01Gene04467	0.599879	-0.737257	0.00800448	0.0326995	yes	down	RecName: Full=Delta(6)-protoilludene synthase; AltName: Full=6-protoilludene synthase
LE01Gene12841	1.84456	0.883275	0.00801113	0.0327071	yes	up	_
LE01Gene04333	1.5114	0.595887	0.00802111	0.0327356	yes	up	_
LE01Gene00258	1.60375	0.681451	0.00803967	0.032799	yes	up	_
LE01Gene04133	1.90378	0.928867	0.00805098	0.0328328	yes	up	RecName: Full=Glucan 1,4-alpha-maltohexaosidase; AltName: Full=Exo-maltohexaohydrolase; AltName: Full=G6-amylase; AltName: Full=Maltohexaose-producing amylase; Flags:
LE01Gene00614	2.22887	1.15631	0.0080622	0.0328538	yes	up	RecName: Full=Glucan 1,3-beta-glucosidase 3; AltName: Full=Exo-1,3-beta-glucanase 3
LE01Gene07629	0.441077	-1.1809	0.00805951	0.0328538	yes	down	_
LE01Gene06256	1.79483	0.843845	0.00806657	0.0328593	yes	up	_
LE01Gene03081	0.638693	-0.646806	0.00808904	0.0329174	yes	down	RecName: Full=Nucleoporin NUP170; AltName: Full=Nuclear pore protein NUP170
LE01Gene11474	2.4021	1.2643	0.00808993	0.0329174	yes	up	_
LE01Gene02099	0.660734	-0.597858	0.00812529	0.0330366	yes	down	_
LE01Gene06079	1.78347	0.834686	0.00816405	0.0331198	yes	up	RecName: Full=Aldo-keto reductase family 4 member C10
LE01Gene13368	0.471243	-1.08546	0.00816218	0.0331198	yes	down	RecName: Full=Accumulation of dyads protein 2; AltName: Full=Ammonia transport outward protein 1
LE01Gene08927	0.656023	-0.608182	0.00816039	0.0331198	yes	down	RecName: Full=26S protease regulatory subunit 7; AltName: Full=26S proteasome AAA-ATPase subunit RPT1; AltName: Full=Proteasome 26S subunit ATPase 2
LE01Gene02480	0.610906	-0.710978	0.00815381	0.0331198	yes	down	RecName: Full=Sarcoplasmic/endoplasmic reticulum calcium ATPase 1; Short=SERCA1; Short=SR Ca(2+)-ATPase 1; AltName: Full=Calcium pump 1; AltName: Full=Calcium-tran
LE01Gene02676	1.63694	0.711005	0.00816309	0.0331198	yes	up	RecName: Full=Uracil catabolism protein 4; AltName: Full=Pyrimidine-degrading protein 14
LE01Gene04253	0.55642	-0.845753	0.00816973	0.0331304	yes	down	RecName: Full=30S ribosomal protein S4
LE01Gene01617	1.91322	0.936006	0.00819528	0.0332037	yes	up	_
LE01Gene02593	2.07942	1.05618	0.00820415	0.0332204	yes	up	_
LE01Gene06536	0.58898	-0.763711	0.00821246	0.0332416	yes	down	_
LE01Gene04635	2.4542	1.29525	0.00824918	0.0333778	yes	up	_
LE01Gene09438	1.51419	0.598543	0.00830068	0.0335612	yes	up	RecName: Full=von Willebrand factor A domain-containing protein 5B1; Flags: Precursor
LE01Gene10196	1.86352	0.898033	0.00830794	0.0335781	yes	up	_
LE01Gene07646	1.59178	0.670639	0.0083414	0.0336757	yes	up	_
LE01Gene04827	0.570033	-0.810882	0.00833914	0.0336757	yes	down	_
LE01Gene03346	1.8617	0.896623	0.00836018	0.0337139	yes	up	_
LE01Gene00091	0.651286	-0.618637	0.0083704	0.0337426	yes	down	_
LE01Gene05683	2.13649	1.09524	0.00839738	0.0338263	yes	up	_
LE01Gene06482	1.58418	0.663732	0.00849306	0.0341793	yes	up	_
[truncated: 184 more rows]

## Sheet: KvsK2
Gene_id	FC(K2/K)	Log2FC(K2/K)	Pvalue	Padjust	Significant	Regulate	Gene description
LE01Gene07962	89.2427	6.47966	4.16899e-49	4.74265e-45	yes	up	_
LE01Gene06808	0.0272015	-5.20017	4.8154e-46	2.739e-42	yes	down	_
LE01Gene03149	0.0528167	-4.24286	2.24591e-45	8.51648e-42	yes	down	_
LE01Gene07162	11.4696	3.51975	1.64999e-42	4.69258e-39	yes	up	RecName: Full=Glyoxal reductase; Short=GR; AltName: Full=Methylglyoxal reductase
LE01Gene10731	29.7131	4.89303	3.42602e-39	7.79489e-36	yes	up	RecName: Full=Guanyl-specific ribonuclease F1; Short=RNase F1; Flags: Precursor
LE01Gene13151	33.5439	5.06798	1.07514e-38	2.03847e-35	yes	up	_
LE01Gene07331	54.4083	5.76575	2.98029e-38	4.8434e-35	yes	up	RecName: Full=Proline-rich receptor-like protein kinase PERK10; AltName: Full=Proline-rich extensin-like receptor kinase 10; Short=AtPERK10
LE01Gene05259	0.137543	-2.86205	6.24515e-37	8.8806e-34	yes	down	RecName: Full=Farnesyl pyrophosphate synthase; Short=FPP synthase; Short=FPS; AltName: Full=(2E,6E)-farnesyl diphosphate synthase; AltName: Full=Dimethylallyltranstra
LE01Gene11540	0.301826	-1.72821	1.63331e-36	2.06451e-33	yes	down	_
LE01Gene12264	9.19519	3.20088	1.38487e-34	1.57543e-31	yes	up	RecName: Full=Putative NADPH dehydrogenase C23G7.10c; AltName: Full=Old yellow enzyme homolog 3
LE01Gene03013	0.121623	-3.03951	7.25789e-33	7.50597e-30	yes	down	RecName: Full=Hydrophobin-1; Flags: Precursor
LE01Gene07441	0.209703	-2.25358	8.70504e-33	8.25238e-30	yes	down	RecName: Full=Probable transporter MCH4
LE01Gene04040	0.352358	-1.50489	1.22749e-32	1.07415e-29	yes	down	RecName: Full=Septin homolog spn3
LE01Gene10272	5.63584	2.49463	8.66153e-32	7.03811e-29	yes	up	_
LE01Gene02993	0.0750488	-3.73603	3.73844e-31	2.83524e-28	yes	down	RecName: Full=Uncharacterized membrane protein YFL054C
LE01Gene03129	11777	13.5237	3.53712e-29	2.51489e-26	yes	up	_
LE01Gene11212	0.366136	-1.44955	2.43229e-28	1.61615e-25	yes	down	RecName: Full=Copia protein; AltName: Full=Gag-int-pol protein; Contains: RecName: Full=Copia VLP protein; Contains: RecName: Full=Copia protease
LE01Gene08310	0.158701	-2.65562	2.5572e-28	1.61615e-25	yes	down	RecName: Full=Glutathione S-transferase 2; AltName: Full=GST-II
LE01Gene09300	0.280451	-1.83418	2.60468e-27	1.55952e-24	yes	down	RecName: Full=Uncharacterized protein YJR142W
LE01Gene06454	101.976	6.67209	5.13448e-27	2.92049e-24	yes	up	_
LE01Gene13022	0.22219	-2.17014	1.04735e-26	5.41575e-24	yes	down	RecName: Full=Monocarboxylate transporter 10; Short=MCT 10; AltName: Full=Solute carrier family 16 member 10
LE01Gene13977	2.94663	1.55906	1.0193e-26	5.41575e-24	yes	up	_
LE01Gene05977	10.854	3.44016	2.1462e-26	1.06153e-23	yes	up	RecName: Full=Nuclease P1; AltName: Full=Deoxyribonuclease P1; AltName: Full=Endonuclease P1
LE01Gene01132	8.38644	3.06806	3.08359e-26	1.46162e-23	yes	up	_
LE01Gene08228	0.367632	-1.44367	4.52657e-26	2.05977e-23	yes	down	RecName: Full=Sulfite reductase
LE01Gene08623	0.145376	-2.78214	1.02887e-25	4.50169e-23	yes	down	_
LE01Gene02729	11.2357	3.49002	1.10073e-25	4.63775e-23	yes	up	_
LE01Gene02161	0.231059	-2.11366	1.2442e-25	5.05499e-23	yes	down	_
LE01Gene11416	0.0672528	-3.89426	3.56528e-25	1.39857e-22	yes	down	_
LE01Gene05790	0.118698	-3.07463	5.61847e-25	2.0618e-22	yes	down	_
LE01Gene11733	8.95506	3.1627	5.61412e-25	2.0618e-22	yes	up	RecName: Full=Transcription factor IWS1 IWS1_CRYNJ RecName: Full=Transcription factor IWS1
LE01Gene08280	0.286688	-1.80244	6.78126e-25	2.41074e-22	yes	down	_
LE01Gene13741	0.239069	-2.0645	7.22046e-25	2.48909e-22	yes	down	_
LE01Gene04879	0.287555	-1.79809	1.19998e-24	4.015e-22	yes	down	RecName: Full=Probable tripeptidyl-peptidase SED3; AltName: Full=Sedolisin-C; Flags: Precursor
LE01Gene00851	0.255096	-1.97089	1.44168e-24	4.68589e-22	yes	down	RecName: Full=Uncharacterized ABC transporter ATP-binding protein C20G4.01
LE01Gene08134	85.6427	6.42026	3.40666e-24	1.07651e-21	yes	up	RecName: Full=Aldose reductase; Short=AR; AltName: Full=Aldehyde reductase
LE01Gene11866	12.245	3.61412	4.07954e-24	1.25429e-21	yes	up	RecName: Full=Stress protein DDR48; AltName: Full=DNA damage-responsive protein 48; Short=DDRP 48; AltName: Full=Flocculent-specific protein; AltName: Full=YP 75
LE01Gene07900	32.2727	5.01224	6.67685e-24	1.99884e-21	yes	up	_
LE01Gene13881	0.00115752	-9.75474	1.28606e-23	3.75135e-21	yes	down	RecName: Full=54S ribosomal protein L19, mitochondrial; Flags: Precursor
LE01Gene11279	15.2113	3.92707	2.41649e-23	6.8725e-21	yes	up	_
LE01Gene11166	9.01139	3.17175	3.92028e-23	1.08774e-20	yes	up	_
LE01Gene01018	0.482678	-1.05087	5.7154e-23	1.54806e-20	yes	down	RecName: Full=Septin homolog spn4
LE01Gene03067	0.378611	-1.40121	8.22999e-23	2.17731e-20	yes	down	RecName: Full=Cell division control protein 3
LE01Gene08156	0.329489	-1.6017	4.02161e-22	1.03977e-19	yes	down	_
LE01Gene07637	0.371879	-1.42709	4.71872e-22	1.19289e-19	yes	down	_
LE01Gene08984	0.312597	-1.67762	4.91613e-22	1.21578e-19	yes	down	_
LE01Gene00915	6.31937	2.65978	1.94395e-21	4.70519e-19	yes	up	_
LE01Gene03359	33.7373	5.07627	2.74844e-21	6.5138e-19	yes	up	_
LE01Gene08539	13.7509	3.78145	3.00055e-21	6.96617e-19	yes	up	RecName: Full=Potential protein lysine methyltransferase SET5; AltName: Full=SET domain-containing protein 5
LE01Gene04824	0.40052	-1.32005	3.5058e-21	7.97639e-19	yes	down	_
LE01Gene06860	22.8011	4.51103	4.34824e-21	9.69914e-19	yes	up	_
LE01Gene07274	5.12242	2.35683	1.00703e-20	2.20308e-18	yes	up	_
LE01Gene10664	27.8797	4.80114	1.51373e-20	3.2491e-18	yes	up	_
LE01Gene03053	0.000348451	-11.4868	1.94062e-20	4.08825e-18	yes	down	_
LE01Gene12447	0.418172	-1.25783	3.21892e-20	6.6579e-18	yes	down	RecName: Full=Multiprotein-bridging factor 1
LE01Gene02211	0.231625	-2.11014	3.37463e-20	6.85531e-18	yes	down	RecName: Full=Probable phosphomevalonate kinase
LE01Gene00643	0.493319	-1.01941	3.92753e-20	7.83853e-18	yes	down	RecName: Full=DNA mismatch repair protein msh3; AltName: Full=MutS protein homolog 3
LE01Gene06113	4.22033	2.07736	4.86828e-20	9.54855e-18	yes	up	RecName: Full=Probable 2-oxoglutarate dehydrogenase E1 component DHKTD1, mitochondrial; AltName: Full=Dehydrogenase E1 and transketolase domain-containing protein
LE01Gene06415	4.99016	2.31908	9.01838e-20	1.73887e-17	yes	up	RecName: Full=Acid phosphatase; Flags: Precursor
LE01Gene13519	0.120599	-3.0517	1.19235e-19	2.26069e-17	yes	down	_
LE01Gene00321	0.439847	-1.18493	2.8957e-19	5.40025e-17	yes	down	RecName: Full=Peptide-N(4)-(N-acetyl-beta-glucosaminyl)asparagine amidase; AltName: Full=Peptide:N-glycanase; Short=PNGase
LE01Gene09780	0.320106	-1.64338	3.54195e-19	6.49892e-17	yes	down	_
LE01Gene00018	9.05258	3.17833	3.88487e-19	7.01497e-17	yes	up	RecName: Full=Putative uncharacterized oxidoreductase C513.07
LE01Gene14223	30.9427	4.95153	4.36448e-19	7.75787e-17	yes	up	RecName: Full=AB hydrolase superfamily protein C1039.03
LE01Gene02903	3.15186	1.6562	6.1583e-19	1.0778e-16	yes	up	RecName: Full=Hsp70 nucleotide exchange factor FES1 FES1_CRYNJ RecName: Full=Hsp70 nucleotide exchange factor FES1
LE01Gene04484	2.95896	1.56509	8.01843e-19	1.38209e-16	yes	up	_
LE01Gene01380	0.275417	-1.86031	1.15942e-18	1.96859e-16	yes	down	RecName: Full=Uncharacterized protein YEL023C
LE01Gene01173	0.350104	-1.51415	2.06707e-18	3.45808e-16	yes	down	_
LE01Gene10992	2.19239	1.13251	2.26348e-18	3.67848e-16	yes	up	_
LE01Gene09689	0.455604	-1.13415	2.24952e-18	3.67848e-16	yes	down	_
LE01Gene01129	0.311225	-1.68397	2.92963e-18	4.69401e-16	yes	down	_
LE01Gene05168	0.41764	-1.25967	3.1606e-18	4.99374e-16	yes	down	_
LE01Gene08202	3.74175	1.90371	3.68775e-18	5.74682e-16	yes	up	_
LE01Gene05045	4.40022	2.13758	4.16808e-18	6.40758e-16	yes	up	_
LE01Gene00850	0.439563	-1.18586	5.66637e-18	8.59475e-16	yes	down	_
LE01Gene09275	2.09678	1.06817	6.20739e-18	9.29148e-16	yes	up	RecName: Full=DNA polymerase alpha-associated DNA helicase A
LE01Gene02855	37.948	5.24595	9.14809e-18	1.35154e-15	yes	up	_
LE01Gene00916	15.717	3.97426	1.16269e-17	1.69573e-15	yes	up	_
LE01Gene14011	0.27512	-1.86187	1.27909e-17	1.84189e-15	yes	down	_
LE01Gene06729	6.25549	2.64512	1.52627e-17	2.14483e-15	yes	up	_
LE01Gene05085	0.130729	-2.93535	1.52718e-17	2.14483e-15	yes	down	RecName: Full=Retrotransposon-like protein 1; AltName: Full=Mammalian retrotransposon derived protein 1; AltName: Full=Paternally expressed gene 11 protein; AltName
LE01Gene04395	0.366911	-1.4465	1.65485e-17	2.29581e-15	yes	down	RecName: Full=6-hydroxy-D-nicotine oxidase; Short=6-HDNO
LE01Gene11731	3.60457	1.84983	2.54065e-17	3.48223e-15	yes	up	RecName: Full=Meiotic coiled-coil protein 2
LE01Gene02904	1544.12	10.5926	2.59713e-17	3.51726e-15	yes	up	RecName: Full=Importin subunit alpha-1; AltName: Full=Cell untimely torn protein 15; AltName: Full=Karyopherin subunit alpha-1; AltName: Full=Serine-rich RNA polymer
LE01Gene10654	0.555855	-0.847219	2.71276e-17	3.63062e-15	yes	down	_
LE01Gene12260	0.285997	-1.80593	3.39737e-17	4.49401e-15	yes	down	_
LE01Gene11444	0.33676	-1.57021	4.10905e-17	5.37294e-15	yes	down	RecName: Full=V-type proton ATPase 16 kDa proteolipid subunit 2; Short=V-ATPase 16 kDa proteolipid subunit 2; AltName: Full=Proteolipid protein VMA11; AltName: Ful
LE01Gene08041	0.480563	-1.0572	5.11377e-17	6.61071e-15	yes	down	_
LE01Gene12553	21.8356	4.44861	5.65401e-17	7.22697e-15	yes	up	_
LE01Gene01355	23.9178	4.58001	6.0551e-17	7.65364e-15	yes	up	_
LE01Gene05769	0.486776	-1.03867	7.83037e-17	9.78882e-15	yes	down	RecName: Full=GTP-binding protein rhoA; AltName: Full=Rho1 protein homolog; Flags: Precursor
LE01Gene07683	0.439656	-1.18555	8.32345e-17	1.02921e-14	yes	down	RecName: Full=Cytochrome b5
LE01Gene08977	30.4661	4.92913	8.56651e-17	1.03673e-14	yes	up	_
LE01Gene01386	0.348228	-1.5219	8.56474e-17	1.03673e-14	yes	down	_
LE01Gene13540	0.0528096	-4.24306	9.62851e-17	1.15299e-14	yes	down	RecName: Full=Fruiting body protein SC3; AltName: Full=Hydrophobin SC3; Flags: Precursor
LE01Gene02425	0.238534	-2.06774	9.93629e-17	1.17745e-14	yes	down	RecName: Full=37S ribosomal protein mrp10, mitochondrial
LE01Gene09092	9.71735	3.28056	1.16094e-16	1.36154e-14	yes	up	_
LE01Gene02149	0.241451	-2.0502	1.26466e-16	1.44345e-14	yes	down	RecName: Full=Probable transporter MCH4
LE01Gene12135	32.008	5.00036	1.26885e-16	1.44345e-14	yes	up	_
LE01Gene01400	0.243016	-2.04088	1.26397e-16	1.44345e-14	yes	down	RecName: Full=Tryptophan 2-halogenase
LE01Gene04290	22.7202	4.5059	1.31033e-16	1.47587e-14	yes	up	_
LE01Gene01826	0.128171	-2.96386	1.33689e-16	1.49102e-14	yes	down	_
LE01Gene01553	0.40409	-1.30725	1.37991e-16	1.52406e-14	yes	down	RecName: Full=Pyruvate dehydrogenase E1 component subunit beta-1, mitochondrial; Short=PDHE1-B; Flags: Precursor
LE01Gene03231	0.451149	-1.14832	1.43782e-16	1.57276e-14	yes	down	_
LE01Gene11342	20.8524	4.38214	2.45193e-16	2.65649e-14	yes	up	_
LE01Gene02585	0.101764	-3.2967	2.50498e-16	2.68837e-14	yes	down	_
LE01Gene04271	2.09952	1.07006	2.56375e-16	2.72572e-14	yes	up	_
LE01Gene00199	24.1241	4.5924	3.28547e-16	3.46069e-14	yes	up	_
LE01Gene10508	19.7095	4.30082	3.79033e-16	3.95585e-14	yes	up	_
LE01Gene00370	28.2533	4.82035	4.10792e-16	4.24834e-14	yes	up	_
LE01Gene13705	7.61492	2.92883	4.87949e-16	5.00082e-14	yes	up	_
LE01Gene06159	8.47555	3.08331	6.51828e-16	6.56212e-14	yes	up	RecName: Full=Conidiation-specific protein 6
LE01Gene11013	2.23564	1.16069	6.48719e-16	6.56212e-14	yes	up	RecName: Full=Putative fumarate reductase; AltName: Full=FAD-dependent oxidoreductase FRDS; AltName: Full=NADH; AltName: Full=NADH-dependent fumarate reductase
LE01Gene00999	26.8446	4.74656	6.74324e-16	6.72904e-14	yes	up	RecName: Full=Polyporopepsin; AltName: Full=Aspartic proteinase
LE01Gene00263	3.00942	1.58948	8.52622e-16	8.43429e-14	yes	up	RecName: Full=Putative acetyl-hydrolase LipR; Flags: Precursor
LE01Gene01567	0.197057	-2.34332	8.60845e-16	8.44222e-14	yes	down	RecName: Full=3-ketodihydrosphingosine reductase TSC10; AltName: Full=3-dehydrosphinganine reductase; AltName: Full=KDS reductase
LE01Gene10150	0.287347	-1.79913	9.93237e-16	9.61159e-14	yes	down	_
LE01Gene00017	8.7372	3.12717	9.96983e-16	9.61159e-14	yes	up	RecName: Full=Caffeine resistance protein 5
LE01Gene13411	0.427844	-1.22484	1.11719e-15	1.068e-13	yes	down	_
LE01Gene03280	1.90896	0.932783	1.17941e-15	1.11808e-13	yes	up	_
LE01Gene00275	207.503	7.69699	1.22303e-15	1.14985e-13	yes	up	RecName: Full=tRNA (guanine(37)-N1)-methyltransferase; AltName: Full=M1G-methyltransferase; AltName: Full=tRNA
LE01Gene04252	0.419709	-1.25254	1.36558e-15	1.27334e-13	yes	down	_
LE01Gene09775	0.413924	-1.27256	1.38834e-15	1.28405e-13	yes	down	RecName: Full=Cysteine-rich PDZ-binding protein; AltName: Full=Cysteine-rich interactor of PDZ three; Short=Cysteine-rich interactor of PDZ3
LE01Gene03512	2.02127	1.01526	1.44747e-15	1.32794e-13	yes	up	_
LE01Gene04746	0.198473	-2.33298	1.52261e-15	1.3857e-13	yes	down	_
LE01Gene13719	3.67778	1.87884	1.63343e-15	1.47475e-13	yes	up	_
LE01Gene11894	11.8053	3.56136	1.71725e-15	1.53823e-13	yes	up	RecName: Full=Phosphatidylserine decarboxylase proenzyme 3; Contains: RecName: Full=Phosphatidylserine decarboxylase 3 beta chain; Contains: RecName: Full=Phosphat
LE01Gene03610	0.375504	-1.4131	1.8229e-15	1.6201e-13	yes	down	RecName: Full=Protein kinase dsk1; AltName: Full=Dis1-suppressing protein kinase
LE01Gene04897	0.00084432	-10.2099	2.29613e-15	2.02486e-13	yes	down	_
LE01Gene07252	3.87816	1.95537	2.58136e-15	2.25889e-13	yes	up	_
LE01Gene12509	4.70049	2.23281	2.97923e-15	2.58342e-13	yes	up	_
LE01Gene09706	1027.62	10.0051	2.99764e-15	2.58342e-13	yes	up	RecName: Full=Uncharacterized oxidoreductase C736.13
LE01Gene02372	11.9593	3.58006	3.4086e-15	2.9155e-13	yes	up	_
LE01Gene02826	29.5534	4.88525	3.48663e-15	2.96e-13	yes	up	_
LE01Gene06587	2.17228	1.11921	3.51924e-15	2.96555e-13	yes	up	RecName: Full=Arginase
LE01Gene11993	2.23992	1.16345	4.07101e-15	3.40528e-13	yes	up	RecName: Full=Probable saccharopine dehydrogenase
LE01Gene02261	0.361038	-1.46978	4.43467e-15	3.6824e-13	yes	down	RecName: Full=UDP-N-acetylglucosamine transferase subunit ALG14; AltName: Full=Asparagine-linked glycosylation protein 14 ALG14_CRYNJ Rec
LE01Gene02541	0.294397	-1.76416	4.5404e-15	3.74287e-13	yes	down	_
LE01Gene12197	4.53451	2.18095	4.62555e-15	3.78563e-13	yes	up	RecName: Full=FK506-binding protein 1; Short=FKBP; AltName: Full=Peptidyl-prolyl cis-trans isomerase; Short=PPIase; AltName: Full=Rapamycin-binding protein 3388
LE01Gene00083	17.887	4.16084	5.2689e-15	4.28136e-13	yes	up	_
LE01Gene09550	0.375755	-1.41214	7.15378e-15	5.73592e-13	yes	down	RecName: Full=Emopamil-binding protein-like; AltName: Full=Emopamil-binding-related protein
LE01Gene13884	0.405395	-1.3026	7.15981e-15	5.73592e-13	yes	down	_
LE01Gene12483	5.49801	2.45891	8.26062e-15	6.57153e-13	yes	up	RecName: Full=Uncharacterized lactate 2-monooxygenase PB1A11.03
LE01Gene02518	3.46506	1.79288	9.35294e-15	7.38882e-13	yes	up	RecName: Full=Heat shock protein HSS1
LE01Gene13817	17.6161	4.13883	1.2458e-14	9.77395e-13	yes	up	RecName: Full=Aldehyde reductase 1; Short=ALR 1; AltName: Full=Alcohol dehydrogenase
LE01Gene09058	0.354094	-1.4978	1.30254e-14	1.01491e-12	yes	down	RecName: Full=Stress response protein nst1
LE01Gene05941	22.8367	4.51328	1.45528e-14	1.12621e-12	yes	up	_
LE01Gene01752	771.27	9.59109	1.8188e-14	1.38929e-12	yes	up	_
LE01Gene07981	0.281451	-1.82905	1.81966e-14	1.38929e-12	yes	down	_
LE01Gene08541	3.57	1.83592	1.90798e-14	1.44701e-12	yes	up	RecName: Full=Potential protein lysine methyltransferase SET5; AltName: Full=SET domain-containing protein 5
LE01Gene12973	16.722	4.06367	1.94559e-14	1.46576e-12	yes	up	_
LE01Gene11234	0.486982	-1.03806	1.96578e-14	1.47123e-12	yes	down	RecName: Full=Protein transport protein Sec61 subunit beta
LE01Gene06604	7.1389	2.8357	2.14251e-14	1.59302e-12	yes	up	_
LE01Gene00180	0.00125682	-9.636	2.2978e-14	1.69739e-12	yes	down	RecName: Full=Origin recognition complex subunit 2; Short=DmORC2
LE01Gene00563	2.53295	1.34082	2.46774e-14	1.81116e-12	yes	up	_
LE01Gene07204	22.9236	4.51876	2.7226e-14	1.9854e-12	yes	up	RecName: Full=17.6 kDa class I heat shock protein 2; AltName: Full=17.6 kDa heat shock protein 2; Short=AtHsp17.6B
LE01Gene00404	11.4852	3.5217	2.89671e-14	2.09891e-12	yes	up	_
LE01Gene02448	8.58087	3.10112	3.22498e-14	2.32199e-12	yes	up	RecName: Full=Glutamate decarboxylase; Short=GAD; AltName: Full=ERT D1
LE01Gene05252	0.459935	-1.1205	3.39314e-14	2.42769e-12	yes	down	_
LE01Gene08952	257.175	8.00661	3.62635e-14	2.57833e-12	yes	up	_
LE01Gene14075	0.413763	-1.27312	3.9726e-14	2.80697e-12	yes	down	_
LE01Gene11519	0.347692	-1.52412	4.12179e-14	2.89441e-12	yes	down	RecName: Full=Septin homolog spn2
LE01Gene03832	2.54083	1.3453	4.15685e-14	2.89503e-12	yes	up	RecName: Full=Carboxylic acid transporter protein homolog
LE01Gene07794	3.17445	1.66651	4.17356e-14	2.89503e-12	yes	up	_
LE01Gene04878	0.449161	-1.1547	4.31007e-14	2.9716e-12	yes	down	RecName: Full=Cysteine synthase 2; Short=CSase 2; AltName: Full=O-acetylserine (thiol)-lyase 2; Short=OAS-TL 2; AltName: Full=O-acetylserine sulfhydrylase 2
LE01Gene01924	4.10499	2.03738	4.58106e-14	3.1394e-12	yes	up	RecName: Full=Zinc finger protein 574
LE01Gene03018	0.333128	-1.58585	4.71281e-14	3.21036e-12	yes	down	_
LE01Gene00626	2.58661	1.37106	5.28653e-14	3.57974e-12	yes	up	RecName: Full=Heat shock protein 82
LE01Gene07595	4.61661	2.20683	6.25536e-14	4.21071e-12	yes	up	_
LE01Gene04700	34.8315	5.12232	6.69497e-14	4.48012e-12	yes	up	_
LE01Gene04593	2.20875	1.14323	6.90929e-14	4.5965e-12	yes	up	_
LE01Gene00659	0.35853	-1.47983	7.93355e-14	5.24722e-12	yes	down	_
LE01Gene01379	28.65	4.84046	8.65866e-14	5.6937e-12	yes	up	_
LE01Gene02519	0.27525	-1.86118	8.91624e-14	5.82938e-12	yes	down	RecName: Full=Retinol dehydrogenase 12
LE01Gene06317	0.24659	-2.01981	8.96856e-14	5.83007e-12	yes	down	RecName: Full=3-ketoacyl-CoA thiolase, peroxisomal; AltName: Full=Acetyl-CoA acyltransferase; AltName: Full=Beta-ketothiolase; AltName: Full=Peroxisomal 3-oxoacyl-CoA
LE01Gene02355	2.74084	1.45462	9.02891e-14	5.83158e-12	yes	up	RecName: Full=Protein transport protein SEC31
LE01Gene02949	19.4841	4.28423	9.0734e-14	5.83158e-12	yes	up	_
LE01Gene11399	2.84978	1.51085	9.41596e-14	6.01775e-12	yes	up	_
LE01Gene11452	10.6837	3.41734	1.11217e-13	7.06819e-12	yes	up	_
LE01Gene07681	0.43861	-1.18899	1.13913e-13	7.19933e-12	yes	down	RecName: Full=Probable phosphoadenosine phosphosulfate reductase; AltName: Full=3'-phosphoadenylylsulfate reductase; AltName: Full=PAPS reductase, thioredoxin depen
LE01Gene02548	15.7961	3.9815	1.20514e-13	7.57439e-12	yes	up	_
LE01Gene01719	8.91663	3.1565	1.2521e-13	7.82629e-12	yes	up	RecName: Full=Major myo-inositol transporter IolT
LE01Gene03468	0.282164	-1.8254	1.29537e-13	8.0525e-12	yes	down	RecName: Full=Putative glycine cleavage system H protein, mitochondrial; AltName: Full=Glycine decarboxylase complex subunit H; Flags: Precursor
LE01Gene03170	6.5941	2.72118	1.42587e-13	8.81558e-12	yes	up	RecName: Full=Heat shock protein hsp98; AltName: Full=Protein aggregation-remodeling factor hsp98
LE01Gene08894	0.390439	-1.35683	1.44021e-13	8.85614e-12	yes	down	_
LE01Gene08007	15.662	3.9692	1.52193e-13	9.30835e-12	yes	up	_
LE01Gene02166	0.209512	-2.25489	1.59073e-13	9.6771e-12	yes	down	_
LE01Gene02455	29.5498	4.88508	1.78785e-13	1.08184e-11	yes	up	RecName: Full=UPF0654 protein C11D3.01c
LE01Gene05358	0.0105628	-6.56486	1.93161e-13	1.16264e-11	yes	down	_
LE01Gene12329	0.292029	-1.77582	2.01413e-13	1.20594e-11	yes	down	RecName: Full=60S ribosome subunit biogenesis protein nip7
LE01Gene11295	4.36192	2.12496	2.0481e-13	1.21985e-11	yes	up	_
LE01Gene11198	2.53595	1.34253	2.15913e-13	1.27929e-11	yes	up	_
LE01Gene07855	11.263	3.49352	2.30578e-13	1.3591e-11	yes	up	_
LE01Gene12982	2.34634	1.23041	2.50917e-13	1.47136e-11	yes	up	RecName: Full=Transcription factor atf1; AltName: Full=Protein sss1; AltName: Full=Transcription factor mts1
LE01Gene09153	0.377899	-1.40393	2.6303e-13	1.53447e-11	yes	down	_
LE01Gene10999	2.42685	1.27909	2.67556e-13	1.55291e-11	yes	up	_
LE01Gene06312	0.294543	-1.76345	2.82795e-13	1.63304e-11	yes	down	RecName: Full=Lathosterol oxidase; AltName: Full=C-5 sterol desaturase; AltName: Full=Delta(7)-sterol 5-desaturase; AltName: Full=Lathosterol 5-desaturase; AltName
LE01Gene05356	2.16945	1.11733	3.08548e-13	1.77275e-11	yes	up	RecName: Full=Glutamine-dependent NAD(+) synthetase; AltName: Full=NAD(+) synthase
LE01Gene05146	0.439387	-1.18644	3.14214e-13	1.79623e-11	yes	down	_
LE01Gene12321	0.363386	-1.46042	3.7557e-13	2.13624e-11	yes	down	RecName: Full=Mitochondrial DNA replication protein YHM2
LE01Gene05227	0.161105	-2.63393	3.91873e-13	2.21788e-11	yes	down	RecName: Full=GDP-mannose transporter; Short=GMT
LE01Gene11045	38.4514	5.26497	4.26473e-13	2.40176e-11	yes	up	_
LE01Gene13123	0.331415	-1.59329	4.34031e-13	2.43229e-11	yes	down	_
LE01Gene13626	2.36168	1.23981	4.87411e-13	2.71803e-11	yes	up	_
LE01Gene11014	6.00799	2.58688	6.40266e-13	3.55301e-11	yes	up	_
LE01Gene03558	0.413506	-1.27402	6.95184e-13	3.83903e-11	yes	down	_
LE01Gene10283	109.669	6.77702	7.3171e-13	4.02122e-11	yes	up	RecName: Full=Serine/threonine-protein kinase gad8
LE01Gene11939	3.08659	1.62602	7.36133e-13	4.02608e-11	yes	up	_
LE01Gene13974	4.42224	2.14478	7.90689e-13	4.30377e-11	yes	up	_
LE01Gene07268	0.53605	-0.899561	8.11772e-13	4.39748e-11	yes	down	RecName: Full=Golgi apparatus membrane protein TVP23
LE01Gene05585	0.556125	-0.846518	8.17145e-13	4.40561e-11	yes	down	RecName: Full=GTP-binding protein ypt1
LE01Gene05816	1.94763	0.961717	8.4796e-13	4.55019e-11	yes	up	_
LE01Gene00357	0.313217	-1.67477	9.0905e-13	4.8551e-11	yes	down	RecName: Full=Glycine dehydrogenase (decarboxylating), mitochondrial; AltName: Full=Glycine cleavage system P protein; AltName: Full=Glycine decarboxylase; AltName:
LE01Gene10089	6.20062	2.63241	9.44834e-13	5.02263e-11	yes	up	RecName: Full=Aspartate--tRNA ligase, cytoplasmic; AltName: Full=Aspartyl-tRNA synthetase; Short=AspRS
LE01Gene09152	0.309836	-1.69042	1.01168e-12	5.35294e-11	yes	down	_
LE01Gene01419	0.575317	-0.79757	1.08405e-12	5.70933e-11	yes	down	RecName: Full=Methylglutaconyl-CoA hydratase, mitochondrial; AltName: Full=AU-specific RNA-binding enoyl-CoA hydratase homolog; Short=AU-binding protein/enoyl-CoA h
LE01Gene10330	0.448405	-1.15713	1.11499e-12	5.84521e-11	yes	down	RecName: Full=Protein SEY1
LE01Gene01872	0.346802	-1.52781	1.12493e-12	5.87027e-11	yes	down	RecName: Full=Mitochondrial import inner membrane translocase subunit tim17; AltName: Full=Mitochondrial protein import protein 2
LE01Gene14624	66.9915	6.06591	1.19419e-12	6.20323e-11	yes	up	_
LE01Gene11698	2.81897	1.49517	1.23774e-12	6.40024e-11	yes	up	_
LE01Gene14395	2.67778	1.42104	1.36716e-12	7.03748e-11	yes	up	RecName: Full=Probable L-threonine 3-dehydrogenase
LE01Gene04245	5.78663	2.53272	1.52747e-12	7.82723e-11	yes	up	RecName: Full=Peroxisomal catalase; AltName: Full=PXP-9
LE01Gene05074	19.538	4.28821	1.64938e-12	8.41405e-11	yes	up	RecName: Full=Arabinogalactan endo-beta-1,4-galactanase A; AltName: Full=Endo-1,4-beta-galactanase A; Short=Galactanase A; Flags: Precursor
LE01Gene11671	0.422264	-1.24378	1.75164e-12	8.89584e-11	yes	down	_
LE01Gene09410	12.8839	3.6875	1.77901e-12	8.99466e-11	yes	up	_
LE01Gene07152	0.589129	-0.763345	1.859e-12	9.35751e-11	yes	down	_
LE01Gene08470	0.270028	-1.88882	1.96765e-12	9.86076e-11	yes	down	_
LE01Gene05094	0.279343	-1.83989	2.22717e-12	1.11124e-10	yes	down	_
LE01Gene06424	0.20092	-2.3153	2.30533e-12	1.14522e-10	yes	down	RecName: Full=LYR motif-containing protein 4
LE01Gene06179	0.515363	-0.95634	2.37187e-12	1.17315e-10	yes	down	RecName: Full=Cytochrome c oxidase polypeptide 5, mitochondrial; AltName: Full=Cytochrome c oxidase polypeptide V; Flags: Precursor
LE01Gene05084	4.34752	2.12019	2.45321e-12	1.20813e-10	yes	up	RecName: Full=Probable glycosidase C21B10.07
LE01Gene05161	8.0986	3.01767	2.53822e-12	1.2446e-10	yes	up	_
LE01Gene09666	336.724	8.39542	2.62094e-12	1.27965e-10	yes	up	_
LE01Gene10327	0.473573	-1.07834	2.76675e-12	1.34507e-10	yes	down	RecName: Full=Ras-related protein Rap-1
LE01Gene06797	829.623	9.69631	2.78332e-12	1.34736e-10	yes	up	_
LE01Gene06771	55.4344	5.79271	2.84946e-12	1.37354e-10	yes	up	_
LE01Gene06875	0.241852	-2.0478	2.97674e-12	1.42883e-10	yes	down	_
LE01Gene08516	0.356699	-1.48722	3.10088e-12	1.47685e-10	yes	down	RecName: Full=Uncharacterized transporter C417.10
LE01Gene03213	786.101	9.61857	3.10273e-12	1.47685e-10	yes	up	_
LE01Gene10760	22.0444	4.46234	3.31233e-12	1.57004e-10	yes	up	_
LE01Gene11259	7.78226	2.96019	3.7144e-12	1.75332e-10	yes	up	_
LE01Gene07349	10.2501	3.35756	3.78331e-12	1.77847e-10	yes	up	RecName: Full=Aspergillopepsin-2; AltName: Full=Acid protease A; AltName: Full=Aspergillopepsin II; AltName: Full=Proctase A; Contains: RecName: Full=Aspergillopepsin
LE01Gene03137	0.386325	-1.37211	3.87289e-12	1.81308e-10	yes	down	RecName: Full=Dihydrofolate reductase
LE01Gene12713	5.09249	2.34837	4.67854e-12	2.18127e-10	yes	up	_
LE01Gene14436	0.394168	-1.34312	4.98381e-12	2.31411e-10	yes	down	_
LE01Gene10644	0.222139	-2.17046	5.03452e-12	2.32816e-10	yes	down	_
LE01Gene03533	6.68352	2.74061	5.65717e-12	2.60551e-10	yes	up	_
LE01Gene02619	0.170318	-2.5537	5.73579e-12	2.63106e-10	yes	down	RecName: Full=Endo-1,4-beta-xylanase B; Short=Xylanase B; AltName: Full=1,4-beta-D-xylan xylanohydrolase B; AltName: Full=Endo-1,4-beta-xylanase G1; Short=Xylanase
LE01Gene07376	2.26877	1.18191	6.17982e-12	2.82336e-10	yes	up	RecName: Full=Serine-rich adhesin for platelets; AltName: Full=Staphylococcus aureus surface protein A; Flags: Precursor
LE01Gene04977	3.03016	1.59939	6.35536e-12	2.89194e-10	yes	up	RecName: Full=Membrane primary amine oxidase; AltName: Full=Copper amine oxidase; AltName: Full=HPAO; AltName: Full=Semicarbazide-sensitive amine oxidase; Short=SSAO
LE01Gene09373	2.46164	1.29962	6.52019e-12	2.95513e-10	yes	up	RecName: Full=Multistep phosphorelay regulator 1
LE01Gene02088	0.256584	-1.9625	6.64038e-12	2.99766e-10	yes	down	RecName: Full=Mitochondrial import inner membrane translocase subunit TIM22 TIM22_CRYNJ RecName: Full=Mitochondrial import inner membrane
LE01Gene04234	0.558586	-0.840149	6.95916e-12	3.12915e-10	yes	down	RecName: Full=Cytochrome c oxidase subunit 6, mitochondrial; AltName: Full=Cytochrome c oxidase polypeptide VI; Flags: Precursor
LE01Gene03382	0.466074	-1.10137	7.0391e-12	3.15263e-10	yes	down	RecName: Full=Probable vacuolar amino acid transporter YPQ1; AltName: Full=PQ-loop repeat-containing protein 1
LE01Gene04577	2.16514	1.11446	7.11978e-12	3.17626e-10	yes	up	_
LE01Gene08223	19.1298	4.25775	7.28531e-12	3.23741e-10	yes	up	_
LE01Gene05412	0.343825	-1.54025	7.63065e-12	3.37768e-10	yes	down	_
LE01Gene05232	0.312955	-1.67597	7.87772e-12	3.47353e-10	yes	down	_
LE01Gene01933	2.57959	1.36714	8.12673e-12	3.56949e-10	yes	up	_
LE01Gene14742	0.501796	-0.994826	8.30701e-12	3.63464e-10	yes	down	_
LE01Gene07234	15.8982	3.99079	9.11026e-12	3.97082e-10	yes	up	_
LE01Gene04101	1.98206	0.986998	9.15392e-12	3.97462e-10	yes	up	_
LE01Gene05361	0.251465	-1.99157	9.77084e-12	4.22635e-10	yes	down	_
LE01Gene01046	0.409335	-1.28865	1.01219e-11	4.36161e-10	yes	down	RecName: Full=Folate transporter 1, chloroplastic; Short=AtFOLT1
LE01Gene08266	0.52967	-0.916835	1.04549e-11	4.48811e-10	yes	down	_
LE01Gene05370	109.505	6.77485	1.1352e-11	4.8549e-10	yes	up	_
LE01Gene08472	0.494061	-1.01724	1.15904e-11	4.93828e-10	yes	down	_
LE01Gene03396	2.66666	1.41503	1.1799e-11	5.00843e-10	yes	up	RecName: Full=Cytochrome b2, mitochondrial; AltName: Full=L-lactate dehydrogenase
LE01Gene10320	0.486571	-1.03928	1.23609e-11	5.22744e-10	yes	down	RecName: Full=Cytochrome c oxidase subunit 6B; AltName: Full=Cytochrome c oxidase polypeptide VIb
LE01Gene02369	2.05286	1.03764	1.30814e-11	5.51162e-10	yes	up	RecName: Full=Mitogen-activated protein kinase kinase kinase kinase 1; AltName: Full=Hematopoietic progenitor kinase; AltName: Full=MAPK/ERK kinase kinase kinase 1;
LE01Gene03469	0.445872	-1.1653	1.37583e-11	5.77543e-10	yes	down	_
LE01Gene05438	0.418478	-1.25677	1.39118e-11	5.81841e-10	yes	down	RecName: Full=Endosomal protein P24B; Flags: Precursor
LE01Gene05469	0.355304	-1.49288	1.41259e-11	5.8863e-10	yes	down	_
LE01Gene05591	0.302566	-1.72468	1.51269e-11	6.28041e-10	yes	down	_
LE01Gene00762	0.426409	-1.22969	1.52235e-11	6.29756e-10	yes	down	_
LE01Gene05096	0.0149754	-6.06126	1.53061e-11	6.30876e-10	yes	down	RecName: Full=Condensin complex subunit 1; AltName: Full=XCAP-D2 homolog; AltName: Full=p128
LE01Gene08981	0.366064	-1.44983	1.57835e-11	6.48206e-10	yes	down	_
LE01Gene10284	0.401588	-1.31621	1.63709e-11	6.6991e-10	yes	down	RecName: Full=Pyruvate dehydrogenase E1 component subunit alpha, mitochondrial; Short=PDHE1-A; Flags: Precursor
LE01Gene00177	2.39648	1.26092	1.69466e-11	6.90982e-10	yes	up	_
LE01Gene08205	0.613258	-0.705434	1.88161e-11	7.64473e-10	yes	down	_
LE01Gene05001	2.84482	1.50834	2.1951e-11	8.88665e-10	yes	up	_
LE01Gene10817	2.69679	1.43124	2.27748e-11	9.18746e-10	yes	up	_
LE01Gene07812	0.504075	-0.988291	2.30294e-11	9.25732e-10	yes	down	RecName: Full=Monothiol glutaredoxin-5, mitochondrial; Flags: Precursor
LE01Gene00426	13.2337	3.72614	2.32935e-11	9.33053e-10	yes	up	_
LE01Gene00879	2.6947	1.43012	2.37038e-11	9.46156e-10	yes	up	RecName: Full=NEDD8-activating enzyme E1 catalytic subunit; AltName: Full=NEDD8-activating enzyme E1C; AltName: Full=Ubiquitin-activating enzyme E1C; AltName: Full=
LE01Gene10771	2.35682	1.23684	2.39602e-11	9.53047e-10	yes	up	RecName: Full=ATP-binding cassette sub-family D member 1; AltName: Full=Adrenoleukodystrophy protein; Short=ALDP
LE01Gene05408	9.28759	3.2153	2.45291e-11	9.72274e-10	yes	up	_
LE01Gene02232	0.390062	-1.35822	2.46669e-11	9.74342e-10	yes	down	_
LE01Gene05029	0.349316	-1.51739	2.50971e-11	9.87906e-10	yes	down	RecName: Full=Probable chitinase 2; Flags: Precursor
LE01Gene00104	14.2249	3.83034	2.61294e-11	1.02499e-09	yes	up	RecName: Full=Sulfated surface glycoprotein 185; Short=SSG 185; Flags: Precursor
LE01Gene05850	0.426921	-1.22796	2.66705e-11	1.04262e-09	yes	down	_
LE01Gene02991	0.48884	-1.03257	2.75939e-11	1.07503e-09	yes	down	RecName: Full=TPR repeat protein oca3; AltName: Full=Overexpression-mediated cell cycle arrest protein 3
LE01Gene09406	11.2221	3.48827	3.01897e-11	1.17214e-09	yes	up	_
LE01Gene11781	16.3764	4.03355	3.09665e-11	1.19821e-09	yes	up	_
LE01Gene08372	2.25866	1.17547	3.54638e-11	1.36758e-09	yes	up	_
LE01Gene11292	6.79578	2.76464	3.6137e-11	1.38415e-09	yes	up	RecName: Full=Zinc finger protein rsv1; AltName: Full=Required for stationary phase viability protein 1
LE01Gene03119	3.0493	1.60848	3.60355e-11	1.38415e-09	yes	up	_
LE01Gene10658	330.296	8.36762	3.83033e-11	1.45187e-09	yes	up	_
LE01Gene07300	0.361165	-1.46927	3.82627e-11	1.45187e-09	yes	down	RecName: Full=Septin homolog spn3
LE01Gene01126	0.269147	-1.89353	3.81994e-11	1.45187e-09	yes	down	RecName: Full=CRAL-TRIO domain-containing protein C23B6.04c
LE01Gene12159	2.60848	1.38321	3.84153e-11	1.45187e-09	yes	up	_
LE01Gene14463	4.02806	2.01008	3.87717e-11	1.46049e-09	yes	up	_
LE01Gene05220	0.391981	-1.35114	3.89575e-11	1.46264e-09	yes	down	RecName: Full=NADH dehydrogenase
LE01Gene08861	0.453642	-1.14037	4.08788e-11	1.52973e-09	yes	down	_
LE01Gene05389	0.239319	-2.063	4.15698e-11	1.55048e-09	yes	down	_
LE01Gene10814	2.92692	1.54938	4.34663e-11	1.61592e-09	yes	up	_
LE01Gene00644	0.451449	-1.14736	4.5351e-11	1.6805e-09	yes	down	RecName: Full=Protein ATP12, mitochondrial; Flags: Precursor
LE01Gene04436	2.02676	1.01918	4.98776e-11	1.84223e-09	yes	up	_
LE01Gene03001	0.486941	-1.03818	5.11979e-11	1.88488e-09	yes	down	RecName: Full=Sphingolipid delta(4)-desaturase/C4-hydroxylase DES2; AltName: Full=Degenerative spermatocyte homolog 2
LE01Gene03471	0.521522	-0.939199	5.31878e-11	1.95182e-09	yes	down	_
LE01Gene11213	0.327397	-1.61089	5.68196e-11	2.07839e-09	yes	down	_
LE01Gene01728	3.52506	1.81765	5.88033e-11	2.14406e-09	yes	up	_
LE01Gene05292	2.6492	1.40556	5.96787e-11	2.16902e-09	yes	up	RecName: Full=Fumarate hydratase, mitochondrial; Short=Fumarase; Flags: Precursor
LE01Gene08336	0.263534	-1.92394	6.04104e-11	2.18863e-09	yes	down	_
LE01Gene02486	2.80777	1.48943	6.21654e-11	2.24506e-09	yes	up	_
LE01Gene03360	0.00215437	-8.85852	6.32524e-11	2.27709e-09	yes	down	_
LE01Gene02085	2.4494	1.29243	7.26686e-11	2.60782e-09	yes	up	_
LE01Gene10929	4.46609	2.15901	7.3364e-11	2.62449e-09	yes	up	_
LE01Gene14566	604.473	9.23954	7.51464e-11	2.67145e-09	yes	up	RecName: Full=Probable RNA-directed DNA polymerase from transposon X-element; AltName: Full=Reverse transcriptase
LE01Gene01269	0.495994	-1.0116	7.51053e-11	2.67145e-09	yes	down	RecName: Full=Damage response protein 1
LE01Gene01273	2.37915	1.25045	8.35805e-11	2.96203e-09	yes	up	RecName: Full=Protein psi1; AltName: Full=Protein psi
LE01Gene10878	6.26177	2.64657	8.52518e-11	3.00255e-09	yes	up	RecName: Full=Aromatic peroxygenase
LE01Gene01742	4.31861	2.11057	8.51301e-11	3.00255e-09	yes	up	_
LE01Gene01102	0.477401	-1.06673	8.64602e-11	3.03116e-09	yes	down	RecName: Full=Mitochondrial import inner membrane translocase subunit tim14; AltName: Full=Presequence translocated-associated motor subunit pam18
LE01Gene05809	0.32419	-1.62509	8.71299e-11	3.03116e-09	yes	down	_
LE01Gene03684	0.429165	-1.2204	8.70709e-11	3.03116e-09	yes	down	RecName: Full=U6 snRNA-associated Sm-like protein LSm7
LE01Gene12151	6.69195	2.74243	8.7129e-11	3.03116e-09	yes	up	RecName: Full=Glucoamylase; AltName: Full=1,4-alpha-D-glucan glucohydrolase; AltName: Full=Glucan 1,4-alpha-glucosidase; Flags: Precursor
LE01Gene13251	1.8859	0.915249	9.0454e-11	3.13721e-09	yes	up	RecName: Full=Cullin-associated NEDD8-dissociated protein 1; AltName: Full=Cullin-associated and neddylation-dissociated protein 1; AltName: Full=p120 CAND1
LE01Gene11079	6.65341	2.73409	9.14606e-11	3.16248e-09	yes	up	_
LE01Gene05156	3.37748	1.75595	9.23286e-11	3.18282e-09	yes	up	RecName: Full=Probable exo-1,4-beta-xylosidase bxlB; AltName: Full=1,4-beta-D-xylan xylohydrolase bxlB; AltName: Full=Beta-xylosidase bxlB; AltName: Full=Xylobiase
LE01Gene10176	3.54865	1.82727	9.52859e-11	3.27484e-09	yes	up	RecName: Full=Peptidyl-prolyl cis-trans isomerase; Short=PPIase; AltName: Full=Cyclophilin; Short=CPH; AltName: Full=Cyclosporin A-binding protein; AltName: Full=Rota
LE01Gene11943	3.50088	1.80772	9.61433e-11	3.29435e-09	yes	up	_
LE01Gene08781	0.519252	-0.945494	1.02228e-10	3.49232e-09	yes	down	_
LE01Gene14268	2.45821	1.29761	1.05357e-10	3.58844e-09	yes	up	RecName: Full=Isotrichodermin C-15 hydroxylase; AltName: Full=Cytochrome P450 65A1
LE01Gene01734	0.452646	-1.14355	1.0682e-10	3.62742e-09	yes	down	RecName: Full=Glycine-rich RNA-binding protein 3, mitochondrial; Short=AtGR-RBP3; AltName: Full=AtRBG3; AltName: Full=Mitochondrial RNA-binding protein 2a; Short=At
LE01Gene11491	1.84665	0.884913	1.09262e-10	3.6993e-09	yes	up	_
LE01Gene12953	4.83865	2.2746	1.09764e-10	3.70526e-09	yes	up	RecName: Full=Alpha-galactosidase; AltName: Full=Alpha-D-galactoside galactohydrolase; AltName: Full=Melibiase; Flags: Precursor
LE01Gene07746	0.370898	-1.43091	1.11076e-10	3.73846e-09	yes	down	_
LE01Gene06290	10.6314	3.41026	1.12999e-10	3.79198e-09	yes	up	_
LE01Gene04187	0.552677	-0.855492	1.18708e-10	3.97184e-09	yes	down	_
LE01Gene03870	0.440734	-1.18202	1.19644e-10	3.99142e-09	yes	down	RecName: Full=Sulfite oxidase, mitochondrial; Flags: Precursor
LE01Gene00179	14.8796	3.89526	1.21949e-10	4.05641e-09	yes	up	_
LE01Gene03148	2.21383	1.14655	1.23169e-10	4.08505e-09	yes	up	RecName: Full=Meiotic recombination protein rec8; AltName: Full=Cohesin rec8
LE01Gene02822	0.495379	-1.01339	1.25683e-10	4.15632e-09	yes	down	RecName: Full=CTP-dependent diacylglycerol kinase 1; AltName: Full=Diglyceride kinase 1; Short=DAG kinase 1
LE01Gene00359	0.302786	-1.72363	1.29128e-10	4.25786e-09	yes	down	_
LE01Gene03403	0.609275	-0.714833	1.37053e-10	4.50611e-09	yes	down	RecName: Full=Putative DNA helicase INO80
LE01Gene01800	0.477198	-1.06734	1.38406e-10	4.53748e-09	yes	down	_
LE01Gene05894	0.257182	-1.95914	1.41527e-10	4.62645e-09	yes	down	_
LE01Gene05695	0.338066	-1.56462	1.46476e-10	4.77452e-09	yes	down	_
LE01Gene11266	0.576784	-0.793898	1.50924e-10	4.90547e-09	yes	down	_
LE01Gene11523	2.3292	1.21983	1.53885e-10	4.98744e-09	yes	up	_
LE01Gene06883	2.48728	1.31457	1.57805e-10	5.07116e-09	yes	up	RecName: Full=Aryl-alcohol dehydrogenase
LE01Gene11182	0.427371	-1.22644	1.57572e-10	5.07116e-09	yes	down	RecName: Full=Uncharacterized ATP-dependent helicase MJ0104
LE01Gene01487	0.197159	-2.34257	1.57785e-10	5.07116e-09	yes	down	_
LE01Gene04819	2.55926	1.35573	1.58989e-10	5.09482e-09	yes	up	RecName: Full=Sexual differentiation process protein isp4
LE01Gene12214	92.7326	6.535	1.60677e-10	5.13445e-09	yes	up	_
LE01Gene02037	0.203915	-2.29396	1.90127e-10	6.0585e-09	yes	down	RecName: Full=Peptidyl-prolyl cis-trans isomerase; Short=PPIase; AltName: Full=Cyclophilin; Short=CPH; AltName: Full=Cyclosporin A-binding protein; AltName: Full=Rota
LE01Gene01963	1.94208	0.957599	1.93481e-10	6.14815e-09	yes	up	RecName: Full=Isoleucine--tRNA ligase, cytoplasmic; AltName: Full=Isoleucyl-tRNA synthetase; Short=IleRS
LE01Gene08373	2.39739	1.26147	1.98357e-10	6.28553e-09	yes	up	_
LE01Gene03391	10.4839	3.3901	2.01694e-10	6.37353e-09	yes	up	_
LE01Gene01918	0.477777	-1.06559	2.03554e-10	6.4145e-09	yes	down	RecName: Full=Homeobox protein Wariai; AltName: Full=Homeobox protein 1; Short=DdHbx-1
LE01Gene10048	0.305791	-1.70938	2.05392e-10	6.43997e-09	yes	down	RecName: Full=Pre-mRNA-splicing factor srp2
LE01Gene12497	69.2481	6.1137	2.05495e-10	6.43997e-09	yes	up	_
LE01Gene01980	2.43447	1.28361	2.09148e-10	6.53645e-09	yes	up	_
LE01Gene12697	0.60727	-0.719589	2.15613e-10	6.70168e-09	yes	down	RecName: Full=Endosomal/prevacuolar sodium/hydrogen exchanger; AltName: Full=Endosomal/prevacuolar Na(+)/H(+) exchanger; AltName: Full=Vacuolar protein sorting-assoc
LE01Gene09181	0.248265	-2.01005	2.1511e-10	6.70168e-09	yes	down	_
LE01Gene02613	0.312314	-1.67893	2.17684e-10	6.7476e-09	yes	down	_
LE01Gene07212	0.242377	-2.04468	2.23895e-10	6.92128e-09	yes	down	RecName: Full=Pentachlorophenol 4-monooxygenase; AltName: Full=Pentachlorophenol hydroxylase
LE01Gene07012	1.95937	0.970393	2.33942e-10	7.21227e-09	yes	up	RecName: Full=Phospho-2-dehydro-3-deoxyheptonate aldolase; AltName: Full=3-deoxy-D-arabino-heptulosonate 7-phosphate synthase; AltName: Full=DAHP synthase; AltName:
LE01Gene02429	0.539319	-0.89079	2.40434e-10	7.39237e-09	yes	down	RecName: Full=Methylsterol monooxygenase; AltName: Full=C-4 methylsterol oxidase
LE01Gene07660	2.42662	1.27895	2.43533e-10	7.46746e-09	yes	up	RecName: Full=DNA damage-inducible protein 1
LE01Gene00893	0.557126	-0.843924	2.53129e-10	7.74085e-09	yes	down	RecName: Full=Uncharacterized MFS-type transporter C1399.02
LE01Gene11152	0.222677	-2.16698	2.54663e-10	7.76688e-09	yes	down	_
LE01Gene08615	1.86731	0.90096	2.71186e-10	8.24011e-09	yes	up	_
LE01Gene10541	0.603486	-0.728607	2.71628e-10	8.24011e-09	yes	down	_
LE01Gene07592	0.416587	-1.26331	2.93844e-10	8.89034e-09	yes	down	_
LE01Gene04955	0.184218	-2.44052	2.98521e-10	9.0079e-09	yes	down	_
LE01Gene10294	0.519479	-0.944861	3.08321e-10	9.27898e-09	yes	down	RecName: Full=Eukaryotic translation initiation factor 1A, X-chromosomal; Short=eIF-1A X isoform; AltName: Full=Eukaryotic translation initiation factor 4C; Short=e
LE01Gene11343	3.14923	1.655	3.09604e-10	9.28828e-09	yes	up	_
LE01Gene01954	1.90538	0.930076	3.10262e-10	9.28828e-09	yes	up	_
LE01Gene10937	0.376442	-1.4095	3.13712e-10	9.36691e-09	yes	down	RecName: Full=Linoleate 10R-lipoxygenase; AltName: Full=Cyclooxygenase-like fatty acid oxygenase; AltName: Full=Fatty acid oxygenase ppoC; AltName: Full=Linoleate
LE01Gene01723	0.384538	-1.3788	3.24429e-10	9.66152e-09	yes	down	RecName: Full=Probable mitochondrial pyruvate carrier 1; Short=MPC1
LE01Gene08080	1.75208	0.809067	3.25283e-10	9.66168e-09	yes	up	RecName: Full=ATP-binding cassette sub-family D member 1; AltName: Full=Adrenoleukodystrophy protein; Short=ALDP
LE01Gene06869	0.365756	-1.45105	3.4187e-10	1.01279e-08	yes	down	_
LE01Gene07144	2.31736	1.21248	4.0358e-10	1.1925e-08	yes	up	RecName: Full=UPF0364 protein C806.04c
LE01Gene00314	0.608238	-0.717293	4.04985e-10	1.19355e-08	yes	down	RecName: Full=Palmitoyltransferase PFA4; AltName: Full=Protein fatty acyltransferase 4
LE01Gene08764	0.403675	-1.30873	4.10563e-10	1.20687e-08	yes	down	_
LE01Gene06466	8.86075	3.14743	4.17527e-10	1.22417e-08	yes	up	_
LE01Gene03453	0.388216	-1.36507	4.23882e-10	1.23961e-08	yes	down	RecName: Full=Acyl carrier protein 2, mitochondrial; AltName: Full=MtACP-2; Short=ACP; AltName: Full=NADH-ubiquinone oxidoreductase 9.6 kDa subunit; Flags: Precurs
LE01Gene11727	17.9494	4.16586	4.27962e-10	1.24833e-08	yes	up	_
LE01Gene14307	0.558667	-0.83994	4.33011e-10	1.25983e-08	yes	down	RecName: Full=ATP synthase subunit d, mitochondrial
LE01Gene11783	2.56961	1.36155	4.39237e-10	1.27468e-08	yes	up	RecName: Full=L-arabinitol 4-dehydrogenase; Short=LAD
LE01Gene04697	0.507013	-0.979905	4.85179e-10	1.40289e-08	yes	down	RecName: Full=Mannosyl-oligosaccharide 1,2-alpha-mannosidase; AltName: Full=Man(9)-alpha-mannosidase
LE01Gene01900	1.7328	0.793107	4.85881e-10	1.40289e-08	yes	up	RecName: Full=MATH and LRR domain-containing protein PFE0570w
LE01Gene05151	0.397777	-1.32997	4.89979e-10	1.41114e-08	yes	down	RecName: Full=Dihydroxyacetone kinase 2; Short=DHA kinase 2; AltName: Full=Glycerone kinase 2; AltName: Full=Triokinase 2; AltName: Full=Triose kinase 2
LE01Gene06160	0.50866	-0.975227	5.25482e-10	1.50957e-08	yes	down	RecName: Full=Serine/threonine-protein kinase KIC1; AltName: Full=Kinase that interacts with CDC31; AltName: Full=N-rich kinase 1
LE01Gene06607	2.13045	1.09115	5.30165e-10	1.51918e-08	yes	up	RecName: Full=Histone-lysine N-methyltransferase, H3 lysine-79 specific; AltName: Full=Disruptor of telomeric silencing A; AltName: Full=Histone H3-K79 methyltran
LE01Gene07968	4.7575	2.2502	5.34443e-10	1.52759e-08	yes	up	_
LE01Gene04483	2.02314	1.0166	5.56725e-10	1.58729e-08	yes	up	RecName: Full=Transcriptional regulatory protein SIN3
LE01Gene08353	1.9865	0.990229	5.79639e-10	1.64849e-08	yes	up	_
LE01Gene09080	3.44365	1.78394	5.81817e-10	1.65056e-08	yes	up	_
LE01Gene12455	0.435848	-1.1981	5.83896e-10	1.65234e-08	yes	down	_
LE01Gene08380	293.03	8.1949	5.91178e-10	1.6688e-08	yes	up	_
LE01Gene00445	0.247736	-2.01312	6.16176e-10	1.73505e-08	yes	down	RecName: Full=Microsomal glutathione S-transferase 3; Short=Microsomal GST-3; AltName: Full=Microsomal GST-III
LE01Gene13702	3.02556	1.5972	6.21137e-10	1.74471e-08	yes	up	_
LE01Gene04180	2.80724	1.48915	6.47511e-10	1.81431e-08	yes	up	RecName: Full=Probable feruloyl esterase B-2; AltName: Full=Ferulic acid esterase B-2; Short=FAEB-2; Flags: Precursor
LE01Gene11802	0.367875	-1.44271	6.51469e-10	1.82091e-08	yes	down	RecName: Full=Peptidyl-prolyl cis-trans isomerase slr1251; Short=PPIase slr1251; AltName: Full=Rotamase slr1251
LE01Gene11334	4.79262	2.26082	6.57455e-10	1.83314e-08	yes	up	_
LE01Gene11644	1.65743	0.728945	6.70365e-10	1.86457e-08	yes	up	_
LE01Gene05369	50.1455	5.64805	6.75339e-10	1.86926e-08	yes	up	_
LE01Gene01946	0.456734	-1.13057	6.73751e-10	1.86926e-08	yes	down	_
LE01Gene06134	0.326761	-1.61369	6.94476e-10	1.91756e-08	yes	down	_
LE01Gene08554	8.07618	3.01367	7.2211e-10	1.98904e-08	yes	up	_
LE01Gene01238	0.572763	-0.803991	7.32042e-10	2.01152e-08	yes	down	RecName: Full=Putative amidase PB8B6.03
LE01Gene04294	4.30573	2.10626	8.44659e-10	2.31538e-08	yes	up	_
LE01Gene03928	0.579468	-0.7872	8.56479e-10	2.34214e-08	yes	down	_
LE01Gene00377	11.2796	3.49565	8.77927e-10	2.39504e-08	yes	up	_
LE01Gene10934	0.507461	-0.978632	9.20527e-10	2.50524e-08	yes	down	_
LE01Gene12414	0.273077	-1.87262	9.51832e-10	2.58426e-08	yes	down	_
LE01Gene03315	2.04938	1.03519	1.01133e-09	2.73925e-08	yes	up	RecName: Full=Short/branched chain specific acyl-CoA dehydrogenase, mitochondrial; Short=SBCAD; AltName: Full=2-methyl branched chain acyl-CoA dehydrogenase; Short
LE01Gene04255	0.280283	-1.83504	1.02637e-09	2.7734e-08	yes	down	RecName: Full=Sterol 24-C-methyltransferase erg6; AltName: Full=Delta(24)-sterol C-methyltransferase erg6; AltName: Full=Ergosterol biosynthesis protein 6
LE01Gene02248	0.542702	-0.881769	1.0387e-09	2.80005e-08	yes	down	_
LE01Gene01633	4.74973	2.24784	1.06021e-09	2.84602e-08	yes	up	RecName: Full=Chitin deacetylase; Flags: Precursor
LE01Gene00646	0.566614	-0.819563	1.06075e-09	2.84602e-08	yes	down	_
LE01Gene01266	0.595547	-0.747712	1.13956e-09	3.05026e-08	yes	down	_
LE01Gene09556	5.43006	2.44097	1.18364e-09	3.16082e-08	yes	up	RecName: Full=Uncharacterized hemerythrin-like protein C869.06c
LE01Gene00806	0.460189	-1.1197	1.21254e-09	3.23041e-08	yes	down	RecName: Full=Secretory carrier-associated membrane protein 5; Short=Secretory carrier membrane protein 5
LE01Gene07257	0.504153	-0.988068	1.22218e-09	3.24292e-08	yes	down	RecName: Full=Uncharacterized membrane protein MJ0933
LE01Gene09608	15.3119	3.93659	1.22294e-09	3.24292e-08	yes	up	_
LE01Gene08489	0.356053	-1.48983	1.24558e-09	3.29528e-08	yes	down	_
LE01Gene07305	0.501846	-0.994683	1.29291e-09	3.41256e-08	yes	down	RecName: Full=Squalene synthase; Short=SQS; Short=SS; AltName: Full=FPP:FPP farnesyltransferase; AltName: Full=Farnesyl-diphosphate farnesyltransferase
LE01Gene00080	0.410117	-1.28589	1.33e-09	3.50233e-08	yes	down	RecName: Full=Cytochrome P450 61; AltName: Full=C-22 sterol desaturase
LE01Gene08622	0.352348	-1.50493	1.34401e-09	3.53105e-08	yes	down	RecName: Full=Tubulin beta chain; AltName: Full=Beta-tubulin
LE01Gene04621	2.57678	1.36557	1.40892e-09	3.69305e-08	yes	up	_
LE01Gene11410	0.478228	-1.06423	1.42437e-09	3.72496e-08	yes	down	_
LE01Gene11104	2.80108	1.48598	1.43736e-09	3.75032e-08	yes	up	_
LE01Gene09722	0.589326	-0.762861	1.53953e-09	4.00772e-08	yes	down	_
LE01Gene05614	0.561636	-0.832293	1.56573e-09	4.06662e-08	yes	down	RecName: Full=WD repeat-containing protein wat1; AltName: Full=WD repeat-containing protein pop3
LE01Gene08204	2.64521	1.40338	1.61716e-09	4.19061e-08	yes	up	_
LE01Gene14622	3.36202	1.74933	1.65567e-09	4.28066e-08	yes	up	_
LE01Gene05460	0.453268	-1.14156	1.66706e-09	4.30033e-08	yes	down	RecName: Full=Protein transport protein sec22
LE01Gene12162	0.520358	-0.942423	1.71134e-09	4.40456e-08	yes	down	_
LE01Gene11597	0.528366	-0.92039	1.77515e-09	4.5585e-08	yes	down	_
LE01Gene12531	2.67056	1.41714	1.86628e-09	4.78172e-08	yes	up	RecName: Full=Fimbrin
LE01Gene10139	2.26915	1.18215	1.93622e-09	4.93867e-08	yes	up	RecName: Full=High-affinity glucose transporter HXT2
LE01Gene00273	0.500833	-0.997599	1.93206e-09	4.93867e-08	yes	down	_
LE01Gene02289	0.423842	-1.2384	2.00288e-09	5.09726e-08	yes	down	RecName: Full=Mitochondrial intermembrane space import and assembly protein 40; AltName: Full=Mitochondrial import inner membrane translocase TIM40; Flags: Precurs
LE01Gene01450	0.336965	-1.56933	2.064e-09	5.23889e-08	yes	down	_
LE01Gene10509	1.89035	0.918657	2.06774e-09	5.23889e-08	yes	up	_
LE01Gene02433	0.450556	-1.15022	2.10081e-09	5.31085e-08	yes	down	RecName: Full=Probable transcriptional regulatory protein SUN_1622
LE01Gene08475	4.56298	2.18998	2.10651e-09	5.31345e-08	yes	up	_
LE01Gene07266	2.85128	1.51161	2.11578e-09	5.32503e-08	yes	up	_
LE01Gene04582	0.631059	-0.664154	2.13162e-09	5.35304e-08	yes	down	RecName: Full=Heat shock factor protein; Short=HSF; AltName: Full=Heat shock transcription factor; Short=HSTF
LE01Gene11625	1.57612	0.656374	2.19978e-09	5.51204e-08	yes	up	RecName: Full=Nuclear elongation and deformation protein 1
LE01Gene02714	65.6164	6.03599	2.20584e-09	5.51508e-08	yes	up	RecName: Full=Aspartic protease; Flags: Precursor
LE01Gene07571	0.495783	-1.01222	2.35507e-09	5.87528e-08	yes	down	_
LE01Gene02241	0.427646	-1.22551	2.44942e-09	6.09728e-08	yes	down	RecName: Full=Tyrosine--tRNA ligase, mitochondrial; AltName: Full=Tyrosyl-tRNA synthetase; Short=TyrRS; Flags: Precursor
LE01Gene00276	0.497258	-1.00793	2.48141e-09	6.16344e-08	yes	down	RecName: Full=Calcium-binding mitochondrial carrier protein Aralar1; AltName: Full=Mitochondrial aspartate glutamate carrier 1; AltName: Full=Solute carrier family
LE01Gene09604	9.74649	3.28488	2.51085e-09	6.22296e-08	yes	up	_
LE01Gene07885	0.451069	-1.14858	2.52524e-09	6.23149e-08	yes	down	RecName: Full=Protein BUD31 homolog; AltName: Full=Protein G10 homolog
LE01Gene01605	2.54942	1.35017	2.52441e-09	6.23149e-08	yes	up	_
LE01Gene02349	9.73058	3.28253	2.65818e-09	6.54533e-08	yes	up	_
LE01Gene08491	2.52724	1.33757	2.69719e-09	6.62704e-08	yes	up	_
LE01Gene03261	0.0634363	-3.97855	2.7115e-09	6.64785e-08	yes	down	_
LE01Gene12240	0.38222	-1.38753	2.7554e-09	6.73286e-08	yes	down	RecName: Full=Cytochrome c oxidase assembly factor 6
LE01Gene08344	3.81659	1.93228	2.75801e-09	6.73286e-08	yes	up	_
LE01Gene10981	0.495951	-1.01173	2.84823e-09	6.93823e-08	yes	down	_
LE01Gene02791	0.41014	-1.28581	2.9419e-09	7.15109e-08	yes	down	RecName: Full=Mulatexin; Short=MLX56; AltName: Full=Latex protein; Flags: Precursor
LE01Gene01120	0.455002	-1.13606	3.07418e-09	7.45669e-08	yes	down	RecName: Full=V-type proton ATPase subunit e; Short=V-ATPase subunit e; AltName: Full=Vacuolar proton pump subunit e
LE01Gene05145	0.448464	-1.15694	3.08381e-09	7.46412e-08	yes	down	_
LE01Gene09151	0.398372	-1.32781	3.27016e-09	7.89838e-08	yes	down	RecName: Full=Mitochondrial substrate carrier family protein G; AltName: Full=Solute carrier family 25 member 20 homolog A
LE01Gene00761	0.519799	-0.943973	3.30406e-09	7.96334e-08	yes	down	RecName: Full=Vacuolar protein sorting-associated protein 55
LE01Gene14598	0.474113	-1.0767	3.41443e-09	8.21196e-08	yes	down	RecName: Full=Protein transport protein SEC13
LE01Gene08832	2.46605	1.3022	3.44749e-09	8.26013e-08	yes	up	_
LE01Gene11483	0.448892	-1.15556	3.44898e-09	8.26013e-08	yes	down	RecName: Full=Putative peroxiredoxin bcp; AltName: Full=Bacterioferritin comigratory protein; AltName: Full=Thioredoxin reductase
LE01Gene05597	10.5063	3.39318	3.45891e-09	8.26651e-08	yes	up	RecName: Full=Tetrahydrocannabinolic acid synthase; Short=THCAS; AltName: Full=Delta(1)-tetrahydrocannabinolic acid synthase; AltName: Full=THCA synthase; Flags: P
LE01Gene11197	1.97134	0.979178	3.59171e-09	8.56589e-08	yes	up	RecName: Full=Dicarboxylic amino acid permease
LE01Gene11814	2.17525	1.12118	3.65239e-09	8.69238e-08	yes	up	_
LE01Gene12813	0.567745	-0.816686	3.68989e-09	8.7633e-08	yes	down	RecName: Full=S-adenosylmethionine synthase; Short=AdoMet synthase; AltName: Full=Ethionine resistance protein 1; AltName: Full=Methionine adenosyltransferase; Short
LE01Gene01974	0.599824	-0.737389	3.70874e-09	8.77236e-08	yes	down	_
LE01Gene08195	0.544982	-0.87572	3.70913e-09	8.77236e-08	yes	down	RecName: Full=Signal peptidase complex subunit 1; AltName: Full=Microsomal signal peptidase 12 kDa subunit; Short=SPase 12 kDa subunit
LE01Gene10873	0.472893	-1.08042	3.72493e-09	8.79145e-08	yes	down	RecName: Full=Magnesium-dependent phosphatase 1; Short=MDP-1
LE01Gene08978	5.53018	2.46733	3.73743e-09	8.8027e-08	yes	up	_
LE01Gene02504	1.92995	0.948562	3.76893e-09	8.85854e-08	yes	up	RecName: Full=Uncharacterized protein UNK4.17
LE01Gene00937	0.428578	-1.22237	3.77913e-09	8.86421e-08	yes	down	_
LE01Gene14762	2.86844	1.52026	3.788e-09	8.86672e-08	yes	up	_
LE01Gene10979	1.72559	0.787086	3.91377e-09	9.14231e-08	yes	up	RecName: Full=Phosphoenolpyruvate carboxykinase
LE01Gene07045	10.6687	3.41532	4.00078e-09	9.3264e-08	yes	up	_
LE01Gene02155	1.82068	0.864477	4.04844e-09	9.4182e-08	yes	up	RecName: Full=Upstream stimulatory factor 1; AltName: Full=Class B basic helix-loop-helix protein 11; Short=bHLHb11; AltName: Full=Major late transcription factor 1
LE01Gene01038	4.57637	2.1942	4.20256e-09	9.75679e-08	yes	up	RecName: Full=High-affinity fructose transporter ght6; AltName: Full=Hexose transporter 6; AltName: Full=Meiotic expression up-regulated protein 12
LE01Gene00281	0.578004	-0.79085	4.26208e-09	9.87483e-08	yes	down	RecName: Full=Protein NipSnap homolog 2; Short=NipSnap2; AltName: Full=Glioblastoma-amplified sequence
LE01Gene13695	0.44317	-1.17407	4.28627e-09	9.9107e-08	yes	down	RecName: Full=WD repeat-containing protein 82
LE01Gene05130	0.391096	-1.3544	4.32342e-09	9.95849e-08	yes	down	RecName: Full=Myocyte-specific enhancer factor 2C
LE01Gene13274	0.317643	-1.65452	4.32445e-09	9.95849e-08	yes	down	RecName: Full=Cytochrome c
LE01Gene03999	0.415128	-1.26837	4.38836e-09	1.00853e-07	yes	down	_
LE01Gene10864	0.334825	-1.57852	4.45609e-09	1.01997e-07	yes	down	_
LE01Gene08403	17.0518	4.09185	4.4488e-09	1.01997e-07	yes	up	_
LE01Gene06781	2.94024	1.55593	4.53035e-09	1.03489e-07	yes	up	_
LE01Gene09222	5.81159	2.53893	4.80891e-09	1.09632e-07	yes	up	_
LE01Gene05031	498.156	8.96045	4.88503e-09	1.11144e-07	yes	up	RecName: Full=Putative uncharacterized oxidoreductase C513.07
LE01Gene01341	0.457376	-1.12855	5.12254e-09	1.16315e-07	yes	down	RecName: Full=Splicing factor 3B subunit 6; AltName: Full=Pre-mRNA branch site protein p14; AltName: Full=SF3b 14 kDa subunit; Short=SF3B14a; AltName: Full=Spliceo
LE01Gene12238	2.45679	1.29678	5.33357e-09	1.20758e-07	yes	up	RecName: Full=NADPH-dependent aldehyde reductase ARI1
LE01Gene02924	0.563795	-0.826757	5.33944e-09	1.20758e-07	yes	down	RecName: Full=Chitin deacetylase; Flags: Precursor
LE01Gene14663	2.49626	1.31977	5.52364e-09	1.24676e-07	yes	up	RecName: Full=Protein kinase byr2; AltName: Full=MAPK kinase kinase; Short=MAPKKK; AltName: Full=Protein kinase ste8
LE01Gene01736	0.320047	-1.64365	5.64738e-09	1.27046e-07	yes	down	_
LE01Gene04054	1.80101	0.848803	5.65094e-09	1.27046e-07	yes	up	RecName: Full=7,8-dihydro-8-oxoguanine triphosphatase; AltName: Full=2-hydroxy-dATP diphosphatase; AltName: Full=8-oxo-dGTPase; AltName: Full=Nucleoside diphosphate-
LE01Gene05859	3.67368	1.87722	5.71728e-09	1.28284e-07	yes	up	_
LE01Gene06446	0.499132	-1.00251	5.80992e-09	1.30037e-07	yes	down	_
LE01Gene00400	3.93761	1.97732	5.81828e-09	1.30037e-07	yes	up	_
LE01Gene04135	0.559461	-0.837891	5.91899e-09	1.32028e-07	yes	down	RecName: Full=Magnesium transporter NIPA2; AltName: Full=Non-imprinted in Prader-Willi/Angelman syndrome region protein 2 homolog
LE01Gene04486	2.64504	1.40329	5.93535e-09	1.32134e-07	yes	up	_
LE01Gene02084	3.76917	1.91425	5.98615e-09	1.33005e-07	yes	up	_
LE01Gene02476	0.636581	-0.651584	6.034e-09	1.33807e-07	yes	down	RecName: Full=Uncharacterized protein C12G12.12
LE01Gene13392	5.0336	2.33159	6.38095e-09	1.41225e-07	yes	up	_
LE01Gene04041	22.1776	4.47103	6.46233e-09	1.42748e-07	yes	up	_
LE01Gene10605	0.479904	-1.05918	6.54445e-09	1.44282e-07	yes	down	_
LE01Gene06169	0.358394	-1.48038	6.57179e-09	1.44605e-07	yes	down	_
LE01Gene01000	14.2029	3.82811	6.59255e-09	1.44782e-07	yes	up	_
LE01Gene10058	1.93682	0.953687	6.66133e-09	1.4601e-07	yes	up	RecName: Full=Probable glutamate--tRNA ligase, cytoplasmic; AltName: Full=Glutamyl-tRNA synthetase; Short=GluRS
LE01Gene00402	1.86698	0.900708	6.71148e-09	1.46827e-07	yes	up	_
LE01Gene08300	13.9901	3.80633	7.22485e-09	1.57721e-07	yes	up	_
LE01Gene06079	7.5974	2.92551	7.2372e-09	1.57721e-07	yes	up	RecName: Full=Aldo-keto reductase family 4 member C10
LE01Gene00956	7.0826	2.82428	7.36241e-09	1.60143e-07	yes	up	_
LE01Gene07874	2.42382	1.27728	7.59382e-09	1.64861e-07	yes	up	RecName: Full=Serine-rich adhesin for platelets; Flags: Precursor
LE01Gene05047	3.23529	1.6939	7.94476e-09	1.72152e-07	yes	up	RecName: Full=Uncharacterized isomerase PM1503
LE01Gene08192	3.19882	1.67754	7.9805e-09	1.72597e-07	yes	up	RecName: Full=Cytochrome P450 71A19
LE01Gene03913	2.37167	1.2459	8.10771e-09	1.75016e-07	yes	up	_
LE01Gene10845	0.33441	-1.58031	8.42946e-09	1.81616e-07	yes	down	RecName: Full=Thaumatin-like protein 1a; AltName: Full=Mdtl1; AltName: Full=Pathogenesis-related protein 5a; Short=PR-5a; AltName: Allergen=Mal d 2; Flags: Precurso
LE01Gene01154	6.94871	2.79675	8.44743e-09	1.8166e-07	yes	up	_
LE01Gene04948	0.278749	-1.84296	8.47272e-09	1.8186e-07	yes	down	_
LE01Gene05456	0.518381	-0.947916	8.55389e-09	1.82912e-07	yes	down	_
LE01Gene12161	0.423801	-1.23854	8.55036e-09	1.82912e-07	yes	down	_
LE01Gene08786	1.73242	0.79279	8.83834e-09	1.8864e-07	yes	up	RecName: Full=F-box/WD repeat-containing protein 7; AltName: Full=F-box and WD-40 domain-containing protein 7; AltName: Full=Protein archipelago
LE01Gene00908	0.412964	-1.27591	8.89307e-09	1.89452e-07	yes	down	RecName: Full=Mitochondrial chaperone BCS1
LE01Gene09553	1.86437	0.89869	9.26998e-09	1.96964e-07	yes	up	_
LE01Gene12821	0.535898	-0.89997	9.28031e-09	1.96964e-07	yes	down	RecName: Full=Thioredoxin; Short=Trx; AltName: Full=MPT46
LE01Gene07025	0.520683	-0.941524	9.30701e-09	1.97163e-07	yes	down	RecName: Full=Uncharacterized transporter C1529.01
LE01Gene08450	7.3635	2.88039	9.45858e-09	2.00002e-07	yes	up	RecName: Full=Cytochrome P450 52A6; AltName: Full=Alkane-inducible P450-ALK3; AltName: Full=CYPLIIA6
LE01Gene03114	0.550488	-0.861216	9.624e-09	2.03122e-07	yes	down	RecName: Full=Probable glutamine amidotransferase DUG3; AltName: Full=Deficient in utilization of glutathione protein 3; AltName: Full=GSH degradosomal complex subun
LE01Gene05219	0.535073	-0.902193	9.948e-09	2.09571e-07	yes	down	RecName: Full=Endoplasmic reticulum vesicle protein 25; Flags: Precursor
LE01Gene03339	0.49714	-1.00828	1.01219e-08	2.1284e-07	yes	down	_
LE01Gene01398	2.03804	1.02718	1.02197e-08	2.145e-07	yes	up	_
LE01Gene05567	3.02602	1.59742	1.0362e-08	2.17086e-07	yes	up	RecName: Full=Glucose-6-phosphate isomerase; Short=GPI; AltName: Full=Phosphoglucose isomerase; Short=PGI; AltName: Full=Phosphohexose isomerase; Short=PHI
LE01Gene05403	6.0024	2.58554	1.07437e-08	2.2467e-07	yes	up	_
LE01Gene04738	3.18418	1.67092	1.08374e-08	2.26213e-07	yes	up	RecName: Full=Copper amine oxidase 1
LE01Gene00627	1.61151	0.688415	1.08684e-08	2.26445e-07	yes	up	_
LE01Gene10576	8.59637	3.10373	1.15274e-08	2.39736e-07	yes	up	_
LE01Gene04520	0.495154	-1.01405	1.18418e-08	2.45826e-07	yes	down	RecName: Full=Putative monoglyceride lipase; Short=MGL; AltName: Full=Monoacylglycerol hydrolase; Short=MAG hydrolase; Short=MGH; AltName: Full=Monoacylglycerol lip
LE01Gene11450	0.496634	-1.00975	1.18801e-08	2.46172e-07	yes	down	_
LE01Gene13422	0.444774	-1.16886	1.19465e-08	2.47097e-07	yes	down	RecName: Full=Aldehyde dehydrogenase; Short=ALDDH; Short=ALDH
LE01Gene09227	0.214517	-2.22083	1.20124e-08	2.48008e-07	yes	down	_
LE01Gene04719	4.17235	2.06086	1.22186e-08	2.51809e-07	yes	up	_
LE01Gene03895	0.524265	-0.931632	1.24034e-08	2.55157e-07	yes	down	_
LE01Gene02133	17.3318	4.11535	1.33221e-08	2.73559e-07	yes	up	_
LE01Gene06115	3.74293	1.90417	1.36862e-08	2.80531e-07	yes	up	_
LE01Gene04461	0.534656	-0.903318	1.38703e-08	2.83793e-07	yes	down	_
LE01Gene05110	0.468804	-1.09294	1.45368e-08	2.96896e-07	yes	down	_
LE01Gene00079	8.23148	3.04115	1.46325e-08	2.98313e-07	yes	up	RecName: Full=Cytochrome P450 714A2; AltName: Full=EUI-like P450 A2
LE01Gene08419	0.356082	-1.48972	1.48138e-08	3.0147e-07	yes	down	RecName: Full=Mitochondrial import inner membrane translocase subunit tim44; Flags: Precursor
LE01Gene01429	0.443476	-1.17307	1.49378e-08	3.03451e-07	yes	down	RecName: Full=ADP-ribosylation factor
LE01Gene07055	0.484273	-1.04611	1.53433e-08	3.11132e-07	yes	down	RecName: Full=Phenol 2-monooxygenase; AltName: Full=Phenol hydroxylase
LE01Gene09790	3.62647	1.85857	1.56245e-08	3.15709e-07	yes	up	RecName: Full=Phosphoglucomutase; Short=PGM; AltName: Full=Glucose phosphomutase
LE01Gene06422	0.163876	-2.60933	1.56069e-08	3.15709e-07	yes	down	RecName: Full=Azole resistance protein 1
LE01Gene09378	0.394838	-1.34067	1.59268e-08	3.21247e-07	yes	down	_
LE01Gene01123	0.400669	-1.31952	1.61139e-08	3.24445e-07	yes	down	RecName: Full=Delta(14)-sterol reductase; AltName: Full=C-14 sterol reductase; AltName: Full=Sterol C14-reductase
LE01Gene03144	0.391725	-1.35209	1.64724e-08	3.31077e-07	yes	down	RecName: Full=Probable mitochondrial pyruvate carrier 2; Short=MPC2
LE01Gene00997	2.59292	1.37458	1.68357e-08	3.37784e-07	yes	up	_
LE01Gene09454	3.77202	1.91534	1.69329e-08	3.39134e-07	yes	up	_
LE01Gene05481	1.90447	0.929392	1.72021e-08	3.43922e-07	yes	up	RecName: Full=S-(hydroxymethyl)glutathione dehydrogenase; AltName: Full=Glutathione-dependent formaldehyde dehydrogenase; Short=FALDH; Short=FDH; Short=FLD; Short=GSH
LE01Gene02352	0.363681	-1.45926	1.95527e-08	3.90231e-07	yes	down	_
LE01Gene12188	6.19518	2.63115	1.97142e-08	3.92764e-07	yes	up	RecName: Full=Meiotically up-regulated gene 158 protein
LE01Gene03194	0.580231	-0.7853	2.01144e-08	4.00037e-07	yes	down	_
LE01Gene12662	0.5661	-0.820872	2.02657e-08	4.02344e-07	yes	down	RecName: Full=Homeodomain-interacting protein kinase 4
LE01Gene07383	0.483646	-1.04798	2.06011e-08	4.0829e-07	yes	down	_
LE01Gene06650	0.461815	-1.11461	2.06653e-08	4.08849e-07	yes	down	RecName: Full=DnaJ homolog subfamily B member 8; AltName: Full=mDj6
LE01Gene08155	0.457767	-1.12731	2.07816e-08	4.10437e-07	yes	down	RecName: Full=ATP synthase subunit f, mitochondrial; Flags: Precursor
LE01Gene03542	0.554812	-0.849929	2.1046e-08	4.14939e-07	yes	down	_
LE01Gene02511	10.202	3.35078	2.12509e-08	4.1804e-07	yes	up	_
LE01Gene01729	4.38245	2.13174	2.12768e-08	4.1804e-07	yes	up	RecName: Full=Uncharacterized esterase/lipase C417.12
LE01Gene10625	0.404039	-1.30743	2.16592e-08	4.24818e-07	yes	down	RecName: Full=Prohibitin-1
LE01Gene02112	1.6879	0.755232	2.17214e-08	4.25306e-07	yes	up	RecName: Full=Glutaryl-CoA dehydrogenase, mitochondrial; Short=GCD; Flags: Precursor
LE01Gene01780	0.591411	-0.757768	2.1775e-08	4.25622e-07	yes	down	_
LE01Gene08862	0.473809	-1.07762	2.19278e-08	4.27874e-07	yes	down	RecName: Full=ER membrane protein complex subunit 4; AltName: Full=Transmembrane protein 85
LE01Gene02601	2.32018	1.21424	2.29664e-08	4.47372e-07	yes	up	RecName: Full=Urease; AltName: Full=Urea amidohydrolase
LE01Gene03371	2.14166	1.09873	2.31163e-08	4.49524e-07	yes	up	_
LE01Gene02633	21.5581	4.43016	2.38491e-08	4.62276e-07	yes	up	_
LE01Gene05158	0.584479	-0.774777	2.3894e-08	4.62276e-07	yes	down	RecName: Full=Abhydrolase domain-containing protein C22H12.03
LE01Gene14072	0.470595	-1.08744	2.38613e-08	4.62276e-07	yes	down	_
LE01Gene12912	0.375744	-1.41218	2.40692e-08	4.64876e-07	yes	down	_
LE01Gene13152	2.08006	1.05663	2.45368e-08	4.73104e-07	yes	up	_
LE01Gene07314	1.69574	0.761918	2.46704e-08	4.74873e-07	yes	up	_
LE01Gene08698	2.15735	1.10926	2.4873e-08	4.77965e-07	yes	up	_
LE01Gene06891	0.387906	-1.36622	2.53079e-08	4.85502e-07	yes	down	_
LE01Gene07834	4.86042	2.28108	2.59367e-08	4.96727e-07	yes	up	_
LE01Gene00354	2.31651	1.21195	2.64337e-08	5.05395e-07	yes	up	_
LE01Gene10248	2.0038	1.00274	2.6666e-08	5.0898e-07	yes	up	RecName: Full=Cyclopentanone 1,2-monooxygenase; Short=CPMO
LE01Gene04133	5.58664	2.48198	2.6817e-08	5.11005e-07	yes	up	RecName: Full=Glucan 1,4-alpha-maltohexaosidase; AltName: Full=Exo-maltohexaohydrolase; AltName: Full=G6-amylase; AltName: Full=Maltohexaose-producing amylase; Flags:
LE01Gene08826	2.01186	1.00853	2.69609e-08	5.12889e-07	yes	up	RecName: Full=Nuclear transport factor 2; Short=NTF-2
LE01Gene04410	224.713	7.81194	2.73476e-08	5.19376e-07	yes	up	_
LE01Gene09665	47.4587	5.5686	2.74088e-08	5.19671e-07	yes	up	_
LE01Gene07031	1.97989	0.985424	2.76448e-08	5.22404e-07	yes	up	RecName: Full=Vitellogenic carboxypeptidase; Flags: Precursor
LE01Gene08569	1.80064	0.848512	2.76357e-08	5.22404e-07	yes	up	RecName: Full=Rho GTPase-activating protein 22; AltName: Full=Rho-type GTPase-activating protein 22; AltName: Full=p68RacGAP
LE01Gene11504	8.798	3.13718	2.77128e-08	5.2282e-07	yes	up	_
LE01Gene05075	23.7346	4.56892	2.84685e-08	5.36189e-07	yes	up	_
LE01Gene14434	2.06964	1.04938	2.85774e-08	5.37349e-07	yes	up	_
LE01Gene06478	0.265963	-1.91071	2.93666e-08	5.51278e-07	yes	down	RecName: Full=High-affinity glucose transporter
LE01Gene12754	13.1058	3.71214	2.96816e-08	5.56274e-07	yes	up	RecName: Full=Negative regulator of sexual conjugation and meiosis
LE01Gene05440	0.575256	-0.797723	2.98162e-08	5.57877e-07	yes	down	RecName: Full=ATP-dependent Clp protease ATP-binding subunit ClpX
LE01Gene10189	3.56993	1.83589	3.09363e-08	5.77479e-07	yes	up	_
LE01Gene06256	2.38809	1.25585	3.09654e-08	5.77479e-07	yes	up	_
LE01Gene11194	1.59379	0.672461	3.14582e-08	5.8571e-07	yes	up	_
LE01Gene06237	2.06496	1.04611	3.1894e-08	5.92852e-07	yes	up	_
LE01Gene11848	0.339071	-1.56034	3.20939e-08	5.95596e-07	yes	down	_
LE01Gene11022	0.350667	-1.51183	3.24788e-08	6.01756e-07	yes	down	RecName: Full=Lysine-specific permease
LE01Gene01672	1.84559	0.884078	3.26338e-08	6.03645e-07	yes	up	RecName: Full=Probable deoxyhypusine synthase; Short=DHS
LE01Gene12479	0.464637	-1.10582	3.28486e-08	6.06632e-07	yes	down	RecName: Full=Nuclease 1, mitochondrial; AltName: Full=SpNUC1; Flags: Precursor
LE01Gene03424	0.460743	-1.11797	3.30471e-08	6.08782e-07	yes	down	RecName: Full=Dihydrolipoyllysine-residue acetyltransferase component of pyruvate dehydrogenase complex, mitochondrial; AltName: Full=70 kDa mitochondrial autoantige
LE01Gene10154	2.05233	1.03726	3.3072e-08	6.08782e-07	yes	up	RecName: Full=Carboxypeptidase S1
LE01Gene00652	0.311712	-1.68171	3.329e-08	6.11804e-07	yes	down	RecName: Full=Zinc finger MYND domain-containing protein 10 homolog
LE01Gene08362	6.17565	2.62659	3.44542e-08	6.3218e-07	yes	up	_
LE01Gene14045	2.52837	1.33821	3.54257e-08	6.48958e-07	yes	up	_
LE01Gene12185	74.2088	6.21352	3.62407e-08	6.62821e-07	yes	up	RecName: Full=Polyporopepsin; AltName: Full=Aspartic proteinase
LE01Gene13704	2.00558	1.00402	3.66307e-08	6.68878e-07	yes	up	_
LE01Gene04699	2.26164	1.17737	3.67693e-08	6.70332e-07	yes	up	_
LE01Gene04259	4.16978	2.05997	3.74148e-08	6.8101e-07	yes	up	_
LE01Gene01002	0.580261	-0.785226	3.76776e-08	6.84698e-07	yes	down	RecName: Full=ABC1 family protein C10F6.14c
LE01Gene01309	0.252021	-1.98839	3.79681e-08	6.88875e-07	yes	down	RecName: Full=Lanosterol 14-alpha demethylase; AltName: Full=CYPLI; AltName: Full=Cytochrome P450 51; AltName: Full=Cytochrome P450-14DM; AltName: Full=Cytochrome P4
LE01Gene05677	2.06092	1.04329	3.81573e-08	6.91206e-07	yes	up	RecName: Full=AB hydrolase superfamily protein C1039.03
LE01Gene04652	2.07487	1.05302	3.85087e-08	6.96e-07	yes	up	_
LE01Gene02075	2.97762	1.57416	3.85443e-08	6.96e-07	yes	up	_
LE01Gene14389	0.188109	-2.41036	4.05813e-08	7.30778e-07	yes	down	_
LE01Gene07576	3.3845	1.75894	4.05988e-08	7.30778e-07	yes	up	_
LE01Gene13906	4.11976	2.04256	4.2473e-08	7.62392e-07	yes	up	RecName: Full=Trehalase; AltName: Full=Alpha,alpha-trehalase; AltName: Full=Alpha,alpha-trehalose glucohydrolase; Flags: Precursor
LE01Gene01312	2.12777	1.08934	4.24892e-08	7.62392e-07	yes	up	_
LE01Gene04319	2.48214	1.31158	4.40944e-08	7.8995e-07	yes	up	_
LE01Gene11239	4.38135	2.13138	4.44046e-08	7.94255e-07	yes	up	_
LE01Gene04318	7.9906	2.9983	4.48073e-08	8.00202e-07	yes	up	_
LE01Gene08238	2.5291	1.33863	4.57436e-08	8.15641e-07	yes	up	RecName: Full=Uncharacterized oxidoreductase C115.03
LE01Gene03974	0.500954	-0.997251	4.62984e-08	8.24242e-07	yes	down	_
LE01Gene11397	0.581809	-0.781383	4.65259e-08	8.26999e-07	yes	down	_
LE01Gene00974	8.22715	3.04039	4.75706e-08	8.44249e-07	yes	up	_
LE01Gene02300	0.267025	-1.90495	4.79421e-08	8.49515e-07	yes	down	RecName: Full=Serine/threonine-protein kinase ssp1
LE01Gene04725	7.30227	2.86835	4.80182e-08	8.49541e-07	yes	up	RecName: Full=Aryl-alcohol dehydrogenase
LE01Gene02534	3.34137	1.74044	4.83172e-08	8.53503e-07	yes	up	_
LE01Gene04023	0.413773	-1.27309	4.92127e-08	8.67976e-07	yes	down	RecName: Full=Acetoacetyl-CoA synthetase
LE01Gene10271	3.04641	1.60711	5.01435e-08	8.83022e-07	yes	up	_
LE01Gene10259	0.535762	-0.900336	5.02964e-08	8.8369e-07	yes	down	_
LE01Gene04030	0.267342	-1.90324	5.03367e-08	8.8369e-07	yes	down	_
LE01Gene00429	0.504719	-0.986448	5.31512e-08	9.28799e-07	yes	down	RecName: Full=DNA-directed RNA polymerases I, II, and III subunit RPABC2; Short=RNA polymerases I, II, and III subunit ABC2; AltName: Full=DNA-directed RNA polymeras
LE01Gene12658	0.196822	-2.34504	5.30313e-08	9.28799e-07	yes	down	_
LE01Gene03934	0.383098	-1.38421	5.31042e-08	9.28799e-07	yes	down	_
LE01Gene06087	0.438749	-1.18853	5.33198e-08	9.30317e-07	yes	down	_
LE01Gene11924	2.25716	1.17451	5.41353e-08	9.43099e-07	yes	up	RecName: Full=Phenol 2-monooxygenase; AltName: Full=Phenol hydroxylase
LE01Gene08705	2.68959	1.42739	5.479e-08	9.53044e-07	yes	up	_
LE01Gene01873	4.53948	2.18253	5.52602e-08	9.59756e-07	yes	up	_
LE01Gene05836	8.71445	3.12341	5.53719e-08	9.6023e-07	yes	up	_
LE01Gene00614	17.7177	4.14712	5.58309e-08	9.66716e-07	yes	up	RecName: Full=Glucan 1,3-beta-glucosidase 3; AltName: Full=Exo-1,3-beta-glucanase 3
LE01Gene11378	4.25893	2.09049	5.60577e-08	9.69168e-07	yes	up	RecName: Full=Protein vip1
LE01Gene01599	5.775	2.52982	5.78653e-08	9.98901e-07	yes	up	_
LE01Gene02593	3.15031	1.65549	5.81755e-08	1.00273e-06	yes	up	_
LE01Gene11958	0.515151	-0.956933	5.84447e-08	1.00433e-06	yes	down	RecName: Full=Uncharacterized oxidoreductase C736.13
LE01Gene08385	0.338383	-1.56327	5.83584e-08	1.00433e-06	yes	down	RecName: Full=Translocation protein sec62
LE01Gene02600	0.489488	-1.03065	5.89462e-08	1.01142e-06	yes	down	_
LE01Gene08867	0.281052	-1.83109	5.91206e-08	1.01289e-06	yes	down	_
LE01Gene09468	2.19833	1.13641	5.98225e-08	1.02337e-06	yes	up	_
LE01Gene06554	0.28261	-1.82312	6.05129e-08	1.03363e-06	yes	down	RecName: Full=Peroxiredoxin; AltName: Full=AsPrx; AltName: Full=Thioredoxin peroxidase
LE01Gene06273	1.63812	0.712041	6.14389e-08	1.04787e-06	yes	up	_
LE01Gene06662	5.0051	2.3234	6.2477e-08	1.06398e-06	yes	up	_
LE01Gene10233	0.552151	-0.856864	6.27812e-08	1.06756e-06	yes	down	RecName: Full=Transmembrane GTPase fzo1
LE01Gene01206	3.04546	1.60666	6.32286e-08	1.07219e-06	yes	up	RecName: Full=L-arabinokinase; Short=AtISA1
LE01Gene13008	0.442893	-1.17497	6.3242e-08	1.07219e-06	yes	down	_
LE01Gene02528	0.348705	-1.51992	6.35832e-08	1.07477e-06	yes	down	RecName: Full=CDP-diacylglycerol--serine O-phosphatidyltransferase; AltName: Full=Phosphatidylserine synthase
LE01Gene12659	0.650317	-0.620786	6.3581e-08	1.07477e-06	yes	down	RecName: Full=Endoglucanase-4; AltName: Full=Cellulase IV; AltName: Full=Cellulase-61A; Short=Cel61A; AltName: Full=Endo-1,4-beta-glucanase IV; Short=EGIV; AltName:
LE01Gene11775	6.30122	2.65563	6.48851e-08	1.09515e-06	yes	up	RecName: Full=D-arabinitol dehydrogenase 1; AltName: Full=NADP-dependent D-arabitol dehydrogenase
LE01Gene10511	0.518587	-0.947342	6.5113e-08	1.09737e-06	yes	down	_
LE01Gene14058	7.2439	2.85677	6.66619e-08	1.12181e-06	yes	up	_
LE01Gene06234	2.54399	1.3471	6.85023e-08	1.15108e-06	yes	up	_
LE01Gene02185	10.4374	3.3837	6.92099e-08	1.16126e-06	yes	up	RecName: Full=CBL-interacting serine/threonine-protein kinase 23; AltName: Full=Protein LOW-K(+)-SENSITIVE 1; AltName: Full=SNF1-related kinase 3.23; AltName: Full
LE01Gene13371	2.84445	1.50815	7.25565e-08	1.21561e-06	yes	up	_
LE01Gene06461	12.3451	3.62587	7.27175e-08	1.21652e-06	yes	up	_
LE01Gene12505	179.226	7.48563	7.30919e-08	1.22059e-06	yes	up	_
LE01Gene00166	2.28214	1.19038	7.31752e-08	1.22059e-06	yes	up	RecName: Full=Probable methionine--tRNA ligase, cytoplasmic; AltName: Full=Methionyl-tRNA synthetase; Short=MetRS
LE01Gene06390	2.12021	1.08421	7.38836e-08	1.2306e-06	yes	up	_
LE01Gene04529	0.537353	-0.896057	7.40501e-08	1.23157e-06	yes	down	RecName: Full=ATP-binding cassette sub-family B member 10, mitochondrial; AltName: Full=ATP-binding cassette transporter 10; Short=ABC transporter 10 protein; Alt
LE01Gene06866	0.490696	-1.0271	7.42134e-08	1.23248e-06	yes	down	RecName: Full=Serine palmitoyltransferase 1; Short=SPT 1; Short=SPT1; AltName: Full=Long chain base biosynthesis protein 1
LE01Gene12822	0.458259	-1.12576	7.50978e-08	1.24535e-06	yes	down	RecName: Full=Guanine nucleotide-binding protein subunit gamma; Flags: Precursor
LE01Gene01001	4.54541	2.18441	7.56931e-08	1.2534e-06	yes	up	_
LE01Gene00432	1.54668	0.629175	7.64019e-08	1.2633e-06	yes	up	_
LE01Gene07768	0.222376	-2.16893	7.71978e-08	1.2746e-06	yes	down	_
LE01Gene10887	0.411966	-1.2794	7.91011e-08	1.30414e-06	yes	down	RecName: Full=Alkyltransferase-like protein 1
LE01Gene04519	1.68525	0.752964	8.01362e-08	1.31929e-06	yes	up	RecName: Full=Asparagine--tRNA ligase, cytoplasmic; AltName: Full=Asparaginyl-tRNA synthetase; Short=AsnRS
LE01Gene03896	8.34385	3.06071	8.21226e-08	1.35004e-06	yes	up	_
LE01Gene00118	0.27972	-1.83794	8.28711e-08	1.36038e-06	yes	down	RecName: Full=Squalene monooxygenase; AltName: Full=Squalene epoxidase; Short=SE
LE01Gene11377	0.556788	-0.844799	8.34537e-08	1.36797e-06	yes	down	RecName: Full=Dihydrolipoyl dehydrogenase, mitochondrial; AltName: Full=Dihydrolipoamide dehydrogenase; Short=DLDH; Flags: Precursor
LE01Gene11570	3.03334	1.60091	8.54026e-08	1.3979e-06	yes	up	_
LE01Gene10245	7.13672	2.83526	8.6722e-08	1.41746e-06	yes	up	RecName: Full=Cyclopentanone 1,2-monooxygenase; Short=CPMO
LE01Gene03658	0.222813	-2.16609	8.70312e-08	1.42047e-06	yes	down	RecName: Full=Phosphatidyl-N-methylethanolamine N-methyltransferase; Short=PLMT; AltName: Full=Overproducer of inositol protein 3; AltName: Full=Unsaturated phospholi
LE01Gene06990	8.36231	3.0639	8.74757e-08	1.42568e-06	yes	up	_
LE01Gene01224	0.500516	-0.998511	8.83288e-08	1.43752e-06	yes	down	_
LE01Gene07656	7.51359	2.9095	8.87889e-08	1.44295e-06	yes	up	RecName: Full=UPF0187 protein RSc3414
LE01Gene10177	4.14132	2.05009	8.98368e-08	1.45789e-06	yes	up	RecName: Full=Fumonisin B1 esterase
LE01Gene04586	0.495253	-1.01376	9.02703e-08	1.46284e-06	yes	down	RecName: Full=ATP synthase subunit 4, mitochondrial; Flags: Precursor
LE01Gene07811	0.611477	-0.709629	9.04493e-08	1.46366e-06	yes	down	RecName: Full=DNL-type zinc finger protein; AltName: Full=Hsp70-escort protein 1; Short=HEP1; AltName: Full=mtHsp70-escort protein; Flags: Precursor
LE01Gene09736	2.55008	1.35054	9.0813e-08	1.46746e-06	yes	up	_
LE01Gene04731	0.262474	-1.92975	9.44116e-08	1.52344e-06	yes	down	_
LE01Gene04161	0.342551	-1.54561	9.5884e-08	1.54501e-06	yes	down	RecName: Full=Lanosterol synthase; AltName: Full=2,3-epoxysqualene--lanosterol cyclase; AltName: Full=Oxidosqualene--lanosterol cyclase; Short=OSC
LE01Gene00236	0.27144	-1.8813	1.00931e-07	1.62404e-06	yes	down	_
LE01Gene09161	2.11125	1.07809	1.03168e-07	1.65769e-06	yes	up	RecName: Full=Protein QA-X
LE01Gene10632	2.49322	1.31801	1.04187e-07	1.667e-06	yes	up	RecName: Full=6-phosphogluconate dehydrogenase, decarboxylating
LE01Gene08481	40.3836	5.3357	1.0416e-07	1.667e-06	yes	up	_
LE01Gene04613	1.69224	0.758933	1.04177e-07	1.667e-06	yes	up	RecName: Full=Lipase; AltName: Full=Triacylglycerol lipase; Flags: Precursor
LE01Gene03920	0.255824	-1.96678	1.10831e-07	1.77081e-06	yes	down	RecName: Full=Cytochrome c peroxidase, mitochondrial; Short=CCP; Flags: Precursor CCPR_CRYNJ RecName: Full=Cytochrome c peroxidase, mitoch
LE01Gene06515	2.90568	1.53888	1.11667e-07	1.77916e-06	yes	up	RecName: Full=Uncharacterized transporter C11D3.06
LE01Gene05041	34.1515	5.09388	1.11552e-07	1.77916e-06	yes	up	_
LE01Gene02089	2.48822	1.31512	1.12483e-07	1.78965e-06	yes	up	_
LE01Gene09772	0.411182	-1.28215	1.19985e-07	1.90635e-06	yes	down	_
LE01Gene06447	0.624257	-0.679788	1.20756e-07	1.91593e-06	yes	down	_
LE01Gene01322	15.8744	3.98863	1.21231e-07	1.92078e-06	yes	up	_
LE01Gene12732	13.2249	3.72519	1.22374e-07	1.9362e-06	yes	up	_
LE01Gene04057	30.8625	4.94778	1.23378e-07	1.94937e-06	yes	up	RecName: Full=Glycine-rich cell wall structural protein; Flags: Precursor
LE01Gene13086	0.42502	-1.2344	1.27656e-07	2.01417e-06	yes	down	_
LE01Gene06120	0.590073	-0.761035	1.28045e-07	2.01751e-06	yes	down	_
LE01Gene08531	0.464586	-1.10598	1.32556e-07	2.08202e-06	yes	down	RecName: Full=Cytochrome c oxidase assembly protein COX19
LE01Gene13064	2.48416	1.31276	1.32584e-07	2.08202e-06	yes	up	_
LE01Gene10997	1.71128	0.775079	1.32688e-07	2.08202e-06	yes	up	_
LE01Gene04016	14.9903	3.90596	1.34929e-07	2.11426e-06	yes	up	_
LE01Gene00304	0.553717	-0.85278	1.35975e-07	2.12772e-06	yes	down	_
LE01Gene02356	0.527176	-0.923642	1.36273e-07	2.12945e-06	yes	down	RecName: Full=Vacuolar amino acid transporter 5
LE01Gene07203	11.0617	3.4675	1.39882e-07	2.18284e-06	yes	up	RecName: Full=Heat shock protein 16; AltName: Full=16 kDa heat shock protein
LE01Gene03426	0.610505	-0.711925	1.41049e-07	2.19804e-06	yes	down	RecName: Full=tRNA N6-adenosine threonylcarbamoyltransferase; AltName: Full=N6-L-threonylcarbamoyladenine synthase; Short=t(6)A synthase; AltName: Full=t(6)A37 thr
LE01Gene00195	0.32317	-1.62963	1.43769e-07	2.23736e-06	yes	down	_
LE01Gene03249	3.59974	1.84789	1.48354e-07	2.30557e-06	yes	up	RecName: Full=Protein MEMO1; AltName: Full=Mediator of ErbB2-driven cell motility 1; Short=Memo-1
LE01Gene00133	1.86513	0.899274	1.51097e-07	2.34499e-06	yes	up	_
LE01Gene06712	8.31829	3.05629	1.51792e-07	2.35257e-06	yes	up	_
LE01Gene08163	10.3282	3.36851	1.57099e-07	2.4315e-06	yes	up	_
LE01Gene00853	1.77143	0.824918	1.57635e-07	2.43649e-06	yes	up	_
LE01Gene10998	3.00677	1.58822	1.60383e-07	2.4754e-06	yes	up	RecName: Full=Protein VTS1
LE01Gene11237	0.554837	-0.849864	1.60588e-07	2.4754e-06	yes	down	_
LE01Gene10325	0.413108	-1.27541	1.63041e-07	2.50981e-06	yes	down	RecName: Full=Mitochondrial import inner membrane translocase subunit TIM13 TIM13_CRYNJ RecName: Full=Mitochondrial import inner membrane
LE01Gene13669	6.12551	2.61483	1.63689e-07	2.51305e-06	yes	up	_
LE01Gene05869	3.64547	1.8661	1.63693e-07	2.51305e-06	yes	up	_
LE01Gene02268	0.401556	-1.31633	1.64888e-07	2.52799e-06	yes	down	_
LE01Gene12350	0.592262	-0.755694	1.69232e-07	2.59109e-06	yes	down	RecName: Full=Nitric oxide synthase-interacting protein homolog
LE01Gene04559	133.259	7.05809	1.69957e-07	2.5987e-06	yes	up	_
LE01Gene10691	0.602918	-0.729967	1.70511e-07	2.60366e-06	yes	down	_
LE01Gene09755	0.508874	-0.974619	1.70829e-07	2.60503e-06	yes	down	RecName: Full=Uncharacterized J domain-containing protein C17A3.05c
LE01Gene10064	0.487776	-1.03571	1.72031e-07	2.61985e-06	yes	down	RecName: Full=Uncharacterized mitochondrial carrier C4G9.20c
LE01Gene00367	0.546011	-0.872999	1.72941e-07	2.63018e-06	yes	down	RecName: Full=Glycogenin-1; Short=GN-1; Short=GN1
LE01Gene04870	0.317108	-1.65695	1.7346e-07	2.63456e-06	yes	down	RecName: Full=4-hydroxybenzoate polyprenyltransferase, mitochondrial; Short=4HPT; AltName: Full=4-hydroxybenzoate nonaprenyltransferase; AltName: Full=Polyprenyltra
LE01Gene06624	60.5357	5.91971	1.73835e-07	2.63673e-06	yes	up	_
LE01Gene12215	9.89028	3.30601	1.74794e-07	2.64775e-06	yes	up	_
LE01Gene04821	0.644821	-0.633029	1.75193e-07	2.65026e-06	yes	down	RecName: Full=Putative uncharacterized protein At4g01020, chloroplastic; Flags: Precursor
LE01Gene01747	3.27856	1.71306	1.76406e-07	2.66506e-06	yes	up	_
LE01Gene10735	0.559291	-0.838329	1.78577e-07	2.69428e-06	yes	down	RecName: Full=ATP-dependent rRNA helicase RRP3
LE01Gene06343	1.78798	0.838334	1.81954e-07	2.74159e-06	yes	up	RecName: Full=Coiled-coil domain-containing protein 124 homolog
LE01Gene03000	2.23802	1.16222	1.83273e-07	2.75783e-06	yes	up	_
LE01Gene06378	0.455234	-1.13532	1.88341e-07	2.82318e-06	yes	down	RecName: Full=Uncharacterized mitochondrial carrier C8C9.12c
LE01Gene04000	0.459878	-1.12068	1.88361e-07	2.82318e-06	yes	down	_
LE01Gene13329	0.506194	-0.982238	1.88019e-07	2.82318e-06	yes	down	RecName: Full=Clathrin light chain; Short=CLC
LE01Gene14316	3.06491	1.61584	1.89329e-07	2.83023e-06	yes	up	_
LE01Gene02421	0.431624	-1.21215	1.89317e-07	2.83023e-06	yes	down	RecName: Full=54S ribosomal protein L31, mitochondrial; AltName: Full=Negative regulator of cdc42 protein nrf20; Flags: Precursor
LE01Gene11854	8.18691	3.03332	1.89595e-07	2.83049e-06	yes	up	_
LE01Gene04992	10.8016	3.43317	1.93967e-07	2.88818e-06	yes	up	_
LE01Gene02004	0.382831	-1.38522	1.95766e-07	2.91116e-06	yes	down	RecName: Full=Inorganic phosphate transport protein PHO88; AltName: Full=Phosphate metabolism protein PHO88
LE01Gene04537	2.51593	1.33109	1.96687e-07	2.92104e-06	yes	up	RecName: Full=Diphthine synthase; AltName: Full=Diphthamide biosynthesis methyltransferase
LE01Gene05178	4.49262	2.16756	1.97743e-07	2.93288e-06	yes	up	RecName: Full=Polyporopepsin; AltName: Full=Aspartic proteinase
LE01Gene05312	0.0169191	-5.8852	2.04096e-07	3.02317e-06	yes	down	RecName: Full=Serine protease inhibitor
LE01Gene00127	10.1312	3.34073	2.08183e-07	3.0757e-06	yes	up	_
LE01Gene06025	0.583506	-0.777181	2.08787e-07	3.08063e-06	yes	down	RecName: Full=Ubiquitin-activating enzyme E1-like; AltName: Full=Pmt3-activating enzyme subunit 2
LE01Gene10462	13.8323	3.78997	2.16798e-07	3.19055e-06	yes	up	_
LE01Gene05613	0.454018	-1.13918	2.16618e-07	3.19055e-06	yes	down	_
LE01Gene11015	3.67306	1.87698	2.18179e-07	3.20673e-06	yes	up	_
LE01Gene03059	4.72973	2.24176	2.18559e-07	3.20816e-06	yes	up	_
LE01Gene00270	4.94739	2.30667	2.21397e-07	3.24563e-06	yes	up	RecName: Full=UPF0364 protein YMR027W
LE01Gene01887	0.594564	-0.750096	2.23757e-07	3.276e-06	yes	down	RecName: Full=Beclin-1-like protein B; AltName: Full=Autophagy-related protein 6B
LE01Gene03612	1.639	0.712815	2.25955e-07	3.30395e-06	yes	up	_
LE01Gene07843	0.575561	-0.79696	2.31957e-07	3.38734e-06	yes	down	_
LE01Gene06413	48.0154	5.58543	2.35806e-07	3.43474e-06	yes	up	_
LE01Gene02215	3.13435	1.64817	2.36163e-07	3.43554e-06	yes	up	RecName: Full=Cytosolic Fe-S cluster assembly factor NAR1; AltName: Full=Nuclear architecture-related protein 1
LE01Gene05950	3.73278	1.90025	2.37355e-07	3.44847e-06	yes	up	_
LE01Gene01904	2.94415	1.55785	2.39134e-07	3.46988e-06	yes	up	_
LE01Gene04081	4.24837	2.08691	2.4471e-07	3.54627e-06	yes	up	RecName: Full=Lipase 5; Flags: Precursor
LE01Gene00610	0.591357	-0.7579	2.47834e-07	3.58698e-06	yes	down	_
LE01Gene07134	0.582197	-0.78042	2.48949e-07	3.59854e-06	yes	down	RecName: Full=Uncharacterized oxidoreductase C736.13
LE01Gene09824	9.69488	3.27722	2.4944e-07	3.60106e-06	yes	up	_
LE01Gene08487	0.0975783	-3.3573	2.52523e-07	3.64094e-06	yes	down	RecName: Full=Fruiting body protein SC3; AltName: Full=Hydrophobin SC3; Flags: Precursor
LE01Gene02283	1.926	0.945609	2.55375e-07	3.67741e-06	yes	up	_
LE01Gene08421	11.2273	3.48894	2.58384e-07	3.71603e-06	yes	up	_
LE01Gene03099	0.501578	-0.995455	2.6164e-07	3.75336e-06	yes	down	_
LE01Gene09341	0.472802	-1.08069	2.62435e-07	3.76002e-06	yes	down	RecName: Full=Small COPII coat GTPase SAR1 SAR1_CRYNJ RecName: Full=Small COPII coat GTPase SAR1
LE01Gene03051	0.581176	-0.782952	2.84535e-07	4.06642e-06	yes	down	RecName: Full=Uncharacterized protein YLR099W-A
LE01Gene10225	0.591625	-0.757245	2.87325e-07	4.09682e-06	yes	down	RecName: Full=V-type proton ATPase 16 kDa proteolipid subunit; Short=V-ATPase 16 kDa proteolipid subunit; AltName: Full=Vacuolar proton pump 16 kDa proteolipid subuni
LE01Gene08990	0.583878	-0.77626	2.88499e-07	4.10759e-06	yes	down	_
LE01Gene12345	1.86399	0.898395	2.91327e-07	4.14266e-06	yes	up	_
LE01Gene07672	2.51147	1.32853	2.9277e-07	4.15799e-06	yes	up	_
LE01Gene09210	1.7202	0.782577	2.93546e-07	4.16381e-06	yes	up	_
LE01Gene02488	0.503397	-0.990233	2.94719e-07	4.17006e-06	yes	down	_
LE01Gene01420	141.693	7.14662	2.94655e-07	4.17006e-06	yes	up	_
LE01Gene07037	2.83463	1.50316	2.98528e-07	4.21869e-06	yes	up	RecName: Full=Dimethylaniline monooxygenase
LE01Gene05034	3.51506	1.81355	3e-07	4.23424e-06	yes	up	RecName: Full=O-methylsterigmatocystin oxidoreductase; Short=OMST oxidoreductase; AltName: Full=Aflatoxin B synthase; AltName: Full=Aflatoxin biosynthesis protein
LE01Gene03957	0.331696	-1.59207	3.00389e-07	4.23448e-06	yes	down	_
LE01Gene08070	0.351622	-1.5079	3.08082e-07	4.33755e-06	yes	down	_
LE01Gene11296	2.52452	1.33601	3.10083e-07	4.36032e-06	yes	up	_
LE01Gene08379	2.5671	1.36014	3.10949e-07	4.3671e-06	yes	up	_
LE01Gene07010	0.55162	-0.858252	3.11762e-07	4.37312e-06	yes	down	_
LE01Gene02291	0.317942	-1.65316	3.16057e-07	4.42792e-06	yes	down	_
LE01Gene04884	0.521366	-0.939631	3.17829e-07	4.44726e-06	yes	down	_
LE01Gene03492	0.526334	-0.92595	3.21821e-07	4.49758e-06	yes	down	_
LE01Gene00312	0.605421	-0.723989	3.28918e-07	4.59113e-06	yes	down	_
LE01Gene09420	1.68516	0.752885	3.29515e-07	4.59382e-06	yes	up	_
LE01Gene13701	0.375358	-1.41366	3.31571e-07	4.61683e-06	yes	down	_
LE01Gene00201	0.468135	-1.095	3.35563e-07	4.6667e-06	yes	down	RecName: Full=Probable splicing factor 3B subunit 5; Short=SF3b5; AltName: Full=Pre-mRNA-splicing factor SF3b 10 kDa subunit
LE01Gene00421	2.55813	1.35509	3.37327e-07	4.6855e-06	yes	up	_
LE01Gene06460	2.91925	1.5456	3.42191e-07	4.74727e-06	yes	up	_
LE01Gene05345	1.6264	0.701686	3.44341e-07	4.77128e-06	yes	up	RecName: Full=Sulfated surface glycoprotein 185; Short=SSG 185; Flags: Precursor
LE01Gene08271	2.36816	1.24377	3.48708e-07	4.82591e-06	yes	up	RecName: Full=Uncharacterized trans-sulfuration enzyme YHR112C
LE01Gene02597	5.6584	2.50039	3.53645e-07	4.8883e-06	yes	up	_
LE01Gene09680	10.5835	3.40374	3.59958e-07	4.96952e-06	yes	up	RecName: Full=Aklaviketone reductase DauE
LE01Gene00054	0.613389	-0.705125	3.61248e-07	4.98128e-06	yes	down	_
LE01Gene11956	0.406418	-1.29897	3.62719e-07	4.99551e-06	yes	down	RecName: Full=Uncharacterized oxidoreductase C736.13
LE01Gene00147	0.412694	-1.27685	3.63784e-07	5.00412e-06	yes	down	RecName: Full=50S ribosomal protein L1
LE01Gene07982	0.437059	-1.1941	3.67615e-07	5.05071e-06	yes	down	RecName: Full=54S ribosomal protein L2, mitochondrial; Flags: Precursor
LE01Gene03476	3.29801	1.7216	3.74695e-07	5.14178e-06	yes	up	_
LE01Gene08691	0.494843	-1.01496	3.78846e-07	5.19247e-06	yes	down	RecName: Full=Mannose-P-dolichol utilization defect 1 protein; AltName: Full=Suppressor of Lec15 and Lec35 glycosylation mutation; Short=SL15
LE01Gene06325	0.462558	-1.11229	3.89875e-07	5.3372e-06	yes	down	RecName: Full=Heat-stable 19 kDa antigen; AltName: Full=CS-AG; Flags: Precursor
LE01Gene03507	0.399781	-1.32272	4.04726e-07	5.53385e-06	yes	down	RecName: Full=Mitochondrial import inner membrane translocase subunit TIM54 TIM54_CRYNJ RecName: Full=Mitochondrial import inner membrane
LE01Gene10629	1.88872	0.91741	4.14987e-07	5.66733e-06	yes	up	RecName: Full=Probable 6-phosphogluconolactonase; Short=6PGL
LE01Gene04574	0.348161	-1.52217	4.1583e-07	5.67205e-06	yes	down	_
LE01Gene09523	0.582004	-0.780898	4.22504e-07	5.75617e-06	yes	down	RecName: Full=Endoplasmic reticulum-Golgi intermediate compartment protein 3; AltName: Full=Serologically defined breast cancer antigen NY-BR-84
LE01Gene00913	0.604619	-0.725903	4.33699e-07	5.90162e-06	yes	down	RecName: Full=V-type proton ATPase subunit D; Short=V-ATPase subunit D; AltName: Full=Vacuolar proton pump subunit D
LE01Gene00066	0.604221	-0.726853	4.40748e-07	5.99038e-06	yes	down	RecName: Full=Mitochondrial dicarboxylate transporter; AltName: Full=DTP; AltName: Full=Dicarboxylate carrier 1
LE01Gene00394	3.02687	1.59783	4.45131e-07	6.04273e-06	yes	up	RecName: Full=Putative NADPH dehydrogenase C23G7.10c; AltName: Full=Old yellow enzyme homolog 3
LE01Gene09190	0.392137	-1.35057	4.46569e-07	6.05503e-06	yes	down	RecName: Full=ATP-dependent RNA helicase mss116, mitochondrial; Flags: Precursor
LE01Gene11604	6.5636	2.71449	4.50418e-07	6.09994e-06	yes	up	_
LE01Gene10525	7.62358	2.93047	4.53662e-07	6.13658e-06	yes	up	_
LE01Gene06391	2.19156	1.13196	4.60027e-07	6.21528e-06	yes	up	RecName: Full=4-hydroxy-2-oxo-heptane-1,7-dioate aldolase; AltName: Full=2,4-dihydroxyhept-2-ene-1,7-dioic acid aldolase; Short=HHED aldolase; AltName: Full=4-hydr
LE01Gene10917	0.593795	-0.751964	4.74047e-07	6.38196e-06	yes	down	RecName: Full=Peptidyl-tRNA hydrolase; Short=PTH
LE01Gene12855	0.339899	-1.55682	4.73918e-07	6.38196e-06	yes	down	RecName: Full=Aminomethyltransferase, mitochondrial; AltName: Full=Glycine cleavage system T protein; Short=GCVT; Flags: Precursor
LE01Gene08917	0.637038	-0.650549	4.7596e-07	6.39258e-06	yes	down	RecName: Full=Canalicular multispecific organic anion transporter 2; AltName: Full=ATP-binding cassette sub-family C member 3; AltName: Full=Multidrug resistance-a
LE01Gene09779	0.60162	-0.733077	4.75565e-07	6.39258e-06	yes	down	_
LE01Gene07384	0.379851	-1.39649	4.78728e-07	6.42217e-06	yes	down	RecName: Full=C-8 sterol isomerase; AltName: Full=Delta-8--delta-7 sterol isomerase
LE01Gene14318	1.8112	0.856949	4.94166e-07	6.62148e-06	yes	up	RecName: Full=Uncharacterized protein C11D3.14c
LE01Gene08743	2.98192	1.57624	4.94937e-07	6.62401e-06	yes	up	RecName: Full=Histidine-rich glycoprotein; Flags: Precursor
LE01Gene01883	7.39077	2.88572	4.99116e-07	6.67208e-06	yes	up	_
LE01Gene03835	99.7738	6.64059	5.00275e-07	6.67973e-06	yes	up	_
LE01Gene06823	0.604257	-0.726766	5.01374e-07	6.68655e-06	yes	down	RecName: Full=Probable alpha-galactosidase D; AltName: Full=Melibiase D; Flags: Precursor
LE01Gene07783	2.11127	1.07811	5.03307e-07	6.70448e-06	yes	up	_
LE01Gene09326	1.98585	0.989757	5.10778e-07	6.79603e-06	yes	up	_
LE01Gene06550	3.97108	1.98953	5.11831e-07	6.80209e-06	yes	up	_
LE01Gene01139	1.84443	0.883174	5.13886e-07	6.82143e-06	yes	up	_
LE01Gene04038	0.594167	-0.751059	5.1829e-07	6.87187e-06	yes	down	RecName: Full=V-type proton ATPase subunit c''; Short=V-ATPase subunit c''; AltName: Full=V-ATPase 22 kDa proteolipid subunit; AltName: Full=Vacuolar proton pump c''
LE01Gene00698	0.655857	-0.608547	5.24326e-07	6.94381e-06	yes	down	RecName: Full=Glycerol-3-phosphate O-acyltransferase 2; Short=G-3-P acyltransferase 2; AltName: Full=Dihydroxyacetone phosphate acyltransferase 2; Short=DHAP-AT 2; Al
LE01Gene04766	7.24408	2.8568	5.26317e-07	6.96207e-06	yes	up	_
LE01Gene02008	2.18049	1.12465	5.2766e-07	6.96365e-06	yes	up	_
LE01Gene01435	0.352185	-1.50559	5.27658e-07	6.96365e-06	yes	down	RecName: Full=Tubulin alpha-1B chain
LE01Gene08354	79.5905	6.31453	5.28657e-07	6.96871e-06	yes	up	_
LE01Gene07922	1683.57	10.7173	5.34026e-07	7.02322e-06	yes	up	RecName: Full=Allantoate permease
LE01Gene04647	5.10639	2.3523	5.33837e-07	7.02322e-06	yes	up	_
LE01Gene08949	0.508494	-0.975698	5.34878e-07	7.0263e-06	yes	down	RecName: Full=RNA 3'-terminal phosphate cyclase; Short=RNA cyclase; Short=RNA-3'-phosphate cyclase; AltName: Full=RNA terminal phosphate cyclase domain-containing
LE01Gene11979	0.252963	-1.983	5.40711e-07	7.09473e-06	yes	down	_
LE01Gene05245	0.481018	-1.05584	5.51371e-07	7.22626e-06	yes	down	RecName: Full=Gamma-glutamyltranspeptidase 2; AltName: Full=Gamma-glutamyltransferase 2; AltName: Full=Glutathione hydrolase 2; Contains: RecName: Full=Gamma-glutam
LE01Gene07741	0.551674	-0.858113	5.54263e-07	7.25581e-06	yes	down	_
LE01Gene10687	0.455925	-1.13313	5.55334e-07	7.25675e-06	yes	down	RecName: Full=GTP-binding protein TypA/BipA homolog
LE01Gene01421	0.62	-0.68966	5.55611e-07	7.25675e-06	yes	down	_
LE01Gene09467	3.83806	1.94038	5.56829e-07	7.26432e-06	yes	up	_
LE01Gene10254	0.606667	-0.721024	5.58105e-07	7.27263e-06	yes	down	_
LE01Gene12322	0.665096	-0.588365	5.59111e-07	7.27456e-06	yes	down	_
LE01Gene00226	0.576024	-0.795799	5.59532e-07	7.27456e-06	yes	down	RecName: Full=Bis(5'-nucleosyl)-tetraphosphatase
LE01Gene08746	0.190552	-2.39174	5.74381e-07	7.45909e-06	yes	down	_
LE01Gene14516	3.58672	1.84266	5.7584e-07	7.4695e-06	yes	up	RecName: Full=Probable sterigmatocystin biosynthesis P450 monooxygenase STCB; AltName: Full=Cytochrome P450 62
LE01Gene10982	0.468245	-1.09466	5.89191e-07	7.62529e-06	yes	down	RecName: Full=Histone H4 H4_AGABI RecName: Full=Histone H4
LE01Gene02111	3.46085	1.79112	6.02799e-07	7.79255e-06	yes	up	RecName: Full=DNA-directed DNA/RNA polymerase mu; Short=Pol Mu; AltName: Full=Terminal transferase
LE01Gene11986	0.172693	-2.53372	6.05306e-07	7.80721e-06	yes	down	_
LE01Gene04061	214.908	7.74758	6.05231e-07	7.80721e-06	yes	up	_
LE01Gene03095	2.20593	1.14139	6.07636e-07	7.82445e-06	yes	up	_
LE01Gene04008	5.14516	2.36322	6.08018e-07	7.82445e-06	yes	up	RecName: Full=Laccase; AltName: Full=Benzenediol:oxygen oxidoreductase; AltName: Full=Diphenol oxidase; AltName: Full=Ligninolytic phenoloxidase; AltName: Full=Uris
LE01Gene02618	0.591589	-0.757332	6.08732e-07	7.82478e-06	yes	down	RecName: Full=Abhydrolase domain-containing protein C22H12.03
LE01Gene05801	0.456798	-1.13037	6.10591e-07	7.83982e-06	yes	down	RecName: Full=3-ketodihydrosphingosine reductase TSC10; AltName: Full=3-dehydrosphinganine reductase; AltName: Full=KDS reductase
LE01Gene07114	2.14158	1.09868	6.25897e-07	8.02728e-06	yes	up	RecName: Full=Glyceraldehyde-3-phosphate dehydrogenase; Short=GAPDH
LE01Gene00842	11.1264	3.47591	6.37563e-07	8.1677e-06	yes	up	_
LE01Gene11902	2.52273	1.33498	6.53751e-07	8.36566e-06	yes	up	_
LE01Gene04829	4.29205	2.10167	6.59353e-07	8.42786e-06	yes	up	RecName: Full=Exoglucanase 1; AltName: Full=1,4-beta-cellobiohydrolase; AltName: Full=Exocellobiohydrolase I; AltName: Full=Exoglucanase I; Flags: Precursor
LE01Gene00756	0.501744	-0.994977	6.76437e-07	8.63653e-06	yes	down	RecName: Full=Transcription elongation factor 1
LE01Gene06563	0.42527	-1.23355	6.80154e-07	8.67425e-06	yes	down	_
LE01Gene03475	2.21	1.14405	6.84676e-07	8.72214e-06	yes	up	_
LE01Gene01575	2.33103	1.22097	6.85962e-07	8.72875e-06	yes	up	_
LE01Gene12774	2.5954	1.37596	6.98447e-07	8.87769e-06	yes	up	RecName: Full=Alcohol dehydrogenase; Short=ADH
LE01Gene06295	2.16023	1.11118	6.99672e-07	8.88334e-06	yes	up	_
LE01Gene04580	0.43885	-1.1882	7.05289e-07	8.94467e-06	yes	down	_
LE01Gene13919	5.06632	2.34094	7.22183e-07	9.12839e-06	yes	up	_
LE01Gene08046	0.48472	-1.04478	7.20873e-07	9.12839e-06	yes	down	RecName: Full=Chaperone protein DnaJ
LE01Gene05498	1.78234	0.833776	7.22023e-07	9.12839e-06	yes	up	RecName: Full=Hsp70/Hsp90 co-chaperone CNS1; AltName: Full=Cyclophilin seven suppressor 1; AltName: Full=STI1 stress-inducible protein homolog
LE01Gene03017	2.77264	1.47126	7.25958e-07	9.16592e-06	yes	up	RecName: Full=Mannose-6-phosphate isomerase; AltName: Full=Phosphohexomutase; AltName: Full=Phosphomannose isomerase; Short=PMI
LE01Gene10714	4.03512	2.01261	7.27032e-07	9.16931e-06	yes	up	_
LE01Gene00874	0.525717	-0.927641	7.30843e-07	9.20716e-06	yes	down	RecName: Full=N-glycosylase/DNA lyase; Includes: RecName: Full=8-oxoguanine DNA glycosylase; Includes: RecName: Full=DNA-(apurinic or apyrimidinic site) lyase; Shor
LE01Gene00395	4.944	2.30568	7.3351e-07	9.23054e-06	yes	up	RecName: Full=Ketosamine-3-kinase; AltName: Full=Fructosamine-3-kinase-related protein
LE01Gene08744	1.60279	0.680583	7.36186e-07	9.25398e-06	yes	up	RecName: Full=Endo-beta-1,4-glucanase D; Short=Endoglucanase D; AltName: Full=Carboxymethylcellulase D; AltName: Full=Cellulase D; Flags: Precursor
LE01Gene02245	0.364201	-1.45719	7.37541e-07	9.26078e-06	yes	down	RecName: Full=40S ribosomal protein S23; AltName: Full=Cytoplasmic ribosomal protein 28
LE01Gene10710	3.10127	1.63286	7.40685e-07	9.2823e-06	yes	up	RecName: Full=Uncharacterized protein YCR102C
LE01Gene04814	1.62903	0.704016	7.40887e-07	9.2823e-06	yes	up	RecName: Full=Uncharacterized transporter C460.05
LE01Gene06097	2.11845	1.08301	7.45198e-07	9.32604e-06	yes	up	RecName: Full=UPF0590 protein C409.17c
LE01Gene06786	0.492656	-1.02135	7.60984e-07	9.51314e-06	yes	down	RecName: Full=S-adenosylmethionine mitochondrial carrier protein; AltName: Full=Mitochondrial S-adenosylmethionine transporter; AltName: Full=Solute carrier family
LE01Gene11703	5.01675	2.32675	7.77121e-07	9.70421e-06	yes	up	_
LE01Gene05179	2.27557	1.18623	7.78819e-07	9.71474e-06	yes	up	_
LE01Gene09363	0.44116	-1.18062	7.82313e-07	9.74763e-06	yes	down	RecName: Full=Uncharacterized HIT-like protein MJ0866
LE01Gene07781	2.0455	1.03246	7.86094e-07	9.78403e-06	yes	up	_
LE01Gene04151	0.354385	-1.49661	8.27323e-07	1.02859e-05	yes	down	_
LE01Gene11933	2.12249	1.08576	8.302e-07	1.03104e-05	yes	up	RecName: Full=Phosphatase DCR2; AltName: Full=Dosage-dependent cell cycle regulator 2
LE01Gene01087	2.63618	1.39845	8.57604e-07	1.06392e-05	yes	up	_
LE01Gene07306	0.251855	-1.98934	8.61178e-07	1.06719e-05	yes	down	_
LE01Gene09079	3.51285	1.81264	8.62699e-07	1.06791e-05	yes	up	RecName: Full=Probable alpha/beta-glucosidase agdC; Flags: Precursor
LE01Gene02565	1.77722	0.829622	8.64846e-07	1.0694e-05	yes	up	_
LE01Gene03101	0.441242	-1.18036	8.80501e-07	1.08758e-05	yes	down	RecName: Full=L-rhamnose-1-dehydrogenase
LE01Gene07397	0.279513	-1.83901	8.83864e-07	1.09055e-05	yes	down	RecName: Full=Lysophospholipid acyltransferase; Short=LPLAT; AltName: Full=1-acyl-sn-glycerol-3-phosphate acyltransferase; Short=AGPAT; AltName: Full=Lysophosphatid
LE01Gene02689	0.588728	-0.764328	8.90028e-07	1.09696e-05	yes	down	RecName: Full=RNA polymerase II transcription factor B subunit 2; AltName: Full=RNA polymerase II transcription factor B 52 kDa subunit; AltName: Full=RNA polymeras
LE01Gene11595	0.626306	-0.67506	8.98566e-07	1.10629e-05	yes	down	RecName: Full=Proteasome subunit beta type-6; AltName: Full=Differentiation-associated proteasome subunit 1; Short=DAPS-1; Flags: Precursor
LE01Gene03346	3.05408	1.61074	9.02882e-07	1.1104e-05	yes	up	_
LE01Gene08214	2.21148	1.14501	9.05508e-07	1.11243e-05	yes	up	_
LE01Gene00073	0.513698	-0.961007	9.0835e-07	1.11471e-05	yes	down	RecName: Full=Vacuolar protein 8
LE01Gene05459	1.8492	0.886904	9.09928e-07	1.11545e-05	yes	up	_
LE01Gene06767	1.94338	0.958566	9.16505e-07	1.1223e-05	yes	up	RecName: Full=Homeobox protein homothorax; AltName: Full=Homeobox protein dorsotonals
LE01Gene03402	0.357366	-1.48453	9.20665e-07	1.12618e-05	yes	down	RecName: Full=Cytochrome P450 71A27
LE01Gene10257	0.507703	-0.977944	9.30441e-07	1.13692e-05	yes	down	_
LE01Gene14267	0.585506	-0.772245	9.39705e-07	1.14578e-05	yes	down	RecName: Full=Synaptobrevin homolog 1
LE01Gene04873	0.602103	-0.731917	9.39159e-07	1.14578e-05	yes	down	RecName: Full=Pre-mRNA-splicing factor ISY1 ISY1_CRYNJ RecName: Full=Pre-mRNA-splicing factor ISY1
LE01Gene01613	0.447929	-1.15866	9.48489e-07	1.15463e-05	yes	down	_
LE01Gene10589	2.49528	1.3192	9.48999e-07	1.15463e-05	yes	up	_
LE01Gene13731	0.632626	-0.660576	9.59405e-07	1.16605e-05	yes	down	_
LE01Gene07135	0.330681	-1.59649	9.63625e-07	1.16868e-05	yes	down	RecName: Full=54S ribosomal protein L37, mitochondrial; AltName: Full=YmL37; Flags: Precursor
LE01Gene11110	4.13858	2.04913	9.63598e-07	1.16868e-05	yes	up	_
LE01Gene05973	3.59692	1.84676	9.7393e-07	1.17992e-05	yes	up	_
LE01Gene03626	2.49543	1.31929	1.0037e-06	1.21469e-05	yes	up	_
LE01Gene08547	0.527359	-0.923144	1.00957e-06	1.2205e-05	yes	down	RecName: Full=Delta(5) fatty acid desaturase A; Short=Delta-5 fatty acid desaturase A
LE01Gene08221	0.363861	-1.45854	1.02267e-06	1.23371e-05	yes	down	RecName: Full=Transposon Ty3-G Gag-Pol polyprotein; AltName: Full=Gag3-Pol3; AltName: Full=Transposon Ty3-1 TYA-TYB polyprotein; Contains: RecName: Full=Capsid pr
LE01Gene09825	3.33155	1.73619	1.02182e-06	1.23371e-05	yes	up	RecName: Full=Uncharacterized aromatic compound monooxygenase YhjG
LE01Gene06078	3.05717	1.61219	1.02675e-06	1.23732e-05	yes	up	RecName: Full=Probable polyamine oxidase 4; Short=AtPAO4; AltName: Full=Amine oxidase 2
LE01Gene00674	1.71311	0.776614	1.03298e-06	1.24351e-05	yes	up	RecName: Full=Lipoamide acyltransferase component of branched-chain alpha-keto acid dehydrogenase complex, mitochondrial; AltName: Full=Branched-chain alpha-keto acid
LE01Gene03136	1.67465	0.743856	1.03525e-06	1.24492e-05	yes	up	RecName: Full=Glucose-insensitive transcription protein 7
LE01Gene05391	0.427095	-1.22737	1.04117e-06	1.25073e-05	yes	down	RecName: Full=Probable small nuclear ribonucleoprotein F; Short=snRNP-F; AltName: Full=Sm protein F; Short=Sm-F; Short=SmF
LE01Gene03975	0.333261	-1.58527	1.04971e-06	1.25966e-05	yes	down	_
LE01Gene07286	0.501992	-0.994263	1.05251e-06	1.26168e-05	yes	down	_
LE01Gene00356	4.12318	2.04376	1.05899e-06	1.26811e-05	yes	up	_
LE01Gene01099	0.443312	-1.17361	1.06198e-06	1.27036e-05	yes	down	RecName: Full=Glutaredoxin-1
LE01Gene09333	6.88392	2.78323	1.07539e-06	1.28504e-05	yes	up	RecName: Full=Phospholipase B; AltName: Full=Lysophospholipase; Flags: Precursor
LE01Gene01031	0.621616	-0.685905	1.0816e-06	1.2911e-05	yes	down	RecName: Full=Nuclear cap-binding protein subunit 1; AltName: Full=80 kDa nuclear cap-binding protein; Short=CBP80; Short=NCBP 80 kDa subunit
LE01Gene05180	0.498407	-1.0046	1.08424e-06	1.29291e-05	yes	down	_
LE01Gene03586	0.370304	-1.43322	1.08925e-06	1.29752e-05	yes	down	RecName: Full=50S ribosomal protein L21
LE01Gene07872	0.558993	-0.839097	1.10512e-06	1.31505e-05	yes	down	RecName: Full=NADH-ubiquinone oxidoreductase 20.8 kDa subunit
LE01Gene08838	0.540118	-0.888654	1.1177e-06	1.32862e-05	yes	down	RecName: Full=Neuroguidin-A; AltName: Full=EIF4E-binding protein A
LE01Gene05198	3.51753	1.81456	1.12415e-06	1.3349e-05	yes	up	_
LE01Gene11476	2.63681	1.39879	1.13273e-06	1.34369e-05	yes	up	_
LE01Gene09140	0.369473	-1.43646	1.1416e-06	1.35279e-05	yes	down	_
LE01Gene11704	2.97031	1.57061	1.15304e-06	1.36493e-05	yes	up	_
LE01Gene03611	0.466436	-1.10025	1.16733e-06	1.38041e-05	yes	down	RecName: Full=PHD finger-like domain-containing protein 5B
LE01Gene13515	6.14368	2.6191	1.16978e-06	1.38187e-05	yes	up	_
LE01Gene07166	0.43763	-1.19222	1.17323e-06	1.38451e-05	yes	down	RecName: Full=INO80 complex subunit 2
LE01Gene09535	6.18869	2.62963	1.17938e-06	1.39032e-05	yes	up	_
LE01Gene09328	0.567737	-0.816705	1.18907e-06	1.39885e-05	yes	down	_
LE01Gene00865	0.478447	-1.06357	1.18816e-06	1.39885e-05	yes	down	RecName: Full=50S ribosomal protein L3
LE01Gene11702	5.08833	2.34719	1.1917e-06	1.40049e-05	yes	up	_
LE01Gene13368	0.317475	-1.65528	1.21473e-06	1.42461e-05	yes	down	RecName: Full=Accumulation of dyads protein 2; AltName: Full=Ammonia transport outward protein 1
LE01Gene12143	2.14824	1.10315	1.22847e-06	1.43924e-05	yes	up	RecName: Full=Probable pre-mRNA-splicing factor ATP-dependent RNA helicase prp43
LE01Gene05366	0.543563	-0.87948	1.23563e-06	1.44559e-05	yes	down	RecName: Full=Dynein 8 kDa light chain, flagellar outer arm
LE01Gene00145	0.575193	-0.797882	1.23643e-06	1.44559e-05	yes	down	_
LE01Gene03964	10.2702	3.36039	1.25039e-06	1.4601e-05	yes	up	_
LE01Gene01778	0.549297	-0.864342	1.25141e-06	1.4601e-05	yes	down	_
LE01Gene11580	0.553993	-0.852061	1.26117e-06	1.46999e-05	yes	down	_
LE01Gene02471	0.45813	-1.12617	1.26269e-06	1.47025e-05	yes	down	_
LE01Gene10973	0.494356	-1.01638	1.27319e-06	1.48096e-05	yes	down	_
LE01Gene01832	0.403735	-1.30852	1.28393e-06	1.49193e-05	yes	down	RecName: Full=Cysteine synthase; Short=CSase; AltName: Full=O-acetylserine (thiol)-lyase; Short=OAS-TL; AltName: Full=O-acetylserine sulfhydrylase
LE01Gene00254	2.3917	1.25804	1.29885e-06	1.50714e-05	yes	up	RecName: Full=Sugar transporter STL1
LE01Gene13378	5.37646	2.42666	1.3123e-06	1.52023e-05	yes	up	RecName: Full=Sulfated surface glycoprotein 185; Short=SSG 185; Flags: Precursor
LE01Gene04024	0.45178	-1.14631	1.3195e-06	1.52702e-05	yes	down	_
LE01Gene04716	2.10988	1.07716	1.33442e-06	1.54272e-05	yes	up	_
LE01Gene08138	0.5721	-0.805661	1.3531e-06	1.56272e-05	yes	down	RecName: Full=Guanine nucleotide-binding protein subunit alpha
LE01Gene01885	0.55703	-0.844174	1.39829e-06	1.61328e-05	yes	down	RecName: Full=ATP synthase subunit delta, mitochondrial; AltName: Full=F-ATPase delta subunit; Flags: Precursor
LE01Gene08934	1.93985	0.955943	1.4226e-06	1.63967e-05	yes	up	_
LE01Gene01388	1.86954	0.902687	1.43862e-06	1.65645e-05	yes	up	RecName: Full=Peptidyl-prolyl cis-trans isomerase D; Short=PPIase D; AltName: Full=Rotamase D
LE01Gene01732	1.56503	0.646194	1.46669e-06	1.68706e-05	yes	up	RecName: Full=3-phosphoinositide-dependent protein kinase 1; AltName: Full=Protein kinase B kinase; Short=PkB kinase
LE01Gene01562	0.43914	-1.18725	1.47814e-06	1.69851e-05	yes	down	RecName: Full=Probable rhamnogalacturonase C; Short=RGase C; Short=RHG C; Flags: Precursor
LE01Gene09746	0.471827	-1.08367	1.48533e-06	1.70506e-05	yes	down	_
LE01Gene04466	0.513882	-0.960491	1.49504e-06	1.71448e-05	yes	down	RecName: Full=Uncharacterized MFS-type transporter C1399.02
LE01Gene03007	0.454062	-1.13904	1.5095e-06	1.72932e-05	yes	down	RecName: Full=ATP synthase subunit gamma, mitochondrial; AltName: Full=F-ATPase gamma subunit; Flags: Precursor
LE01Gene02621	1.83186	0.87331	1.51803e-06	1.73734e-05	yes	up	_
LE01Gene05262	0.543865	-0.878679	1.5432e-06	1.76437e-05	yes	down	RecName: Full=Transmembrane emp24 domain-containing protein 4; AltName: Full=Endoplasmic reticulum stress-response protein 25; Short=ERS25; AltName: Full=GMP25iso;
LE01Gene01438	1.60839	0.68562	1.57467e-06	1.79854e-05	yes	up	RecName: Full=Probable glutamine--tRNA ligase; AltName: Full=Glutaminyl-tRNA synthetase; Short=GlnRS
LE01Gene11265	0.542427	-0.882499	1.57748e-06	1.79994e-05	yes	down	RecName: Full=Transcriptional repressor rco-1
LE01Gene05287	0.58214	-0.780561	1.60765e-06	1.83252e-05	yes	down	_
LE01Gene10615	2.8614	1.51672	1.63486e-06	1.86168e-05	yes	up	_
LE01Gene04708	0.281338	-1.82962	1.66056e-06	1.88906e-05	yes	down	RecName: Full=ADP,ATP carrier protein; AltName: Full=ADP/ATP translocase; AltName: Full=Adenine nucleotide translocator; Short=ANT
LE01Gene08452	1.95008	0.963534	1.68736e-06	1.91762e-05	yes	up	_
LE01Gene00943	1.92158	0.94229	1.69249e-06	1.92153e-05	yes	up	RecName: Full=Acyl-CoA dehydrogenase family member 9, mitochondrial; Short=ACAD-9; Flags: Precursor
LE01Gene05224	3.19278	1.67481	1.70812e-06	1.93734e-05	yes	up	RecName: Full=Glycogen debranching enzyme; AltName: Full=Glycogen debrancher; Includes: RecName: Full=4-alpha-glucanotransferase; AltName: Full=Oligo-1,4-1,4-glucant
LE01Gene01209	0.581185	-0.782931	1.71046e-06	1.93807e-05	yes	down	RecName: Full=Phosphatidylserine decarboxylase proenzyme 1, mitochondrial; Contains: RecName: Full=Phosphatidylserine decarboxylase 1 beta chain; Contains: RecName
LE01Gene08335	0.492855	-1.02076	1.72925e-06	1.95718e-05	yes	down	_
LE01Gene03936	10.0629	3.33098	1.73077e-06	1.95718e-05	yes	up	_
LE01Gene06871	0.491715	-1.02411	1.76424e-06	1.99305e-05	yes	down	_
LE01Gene11269	0.509755	-0.972125	1.77131e-06	1.99905e-05	yes	down	RecName: Full=DNA-directed RNA polymerases I and III subunit RPAC2; Short=RNA polymerases I and III subunit AC2; AltName: Full=AC19; AltName: Full=DNA-directed RNA
LE01Gene08127	2.32919	1.21983	1.81809e-06	2.04981e-05	yes	up	RecName: Full=Putative cryptochrome DASH, mitochondrial; Flags: Precursor
LE01Gene06074	5.46303	2.4497	1.82529e-06	2.05589e-05	yes	up	_
LE01Gene11628	0.543938	-0.878485	1.83653e-06	2.06651e-05	yes	down	RecName: Full=Beta-1,3-glucan-binding protein; Short=GBP; Flags: Precursor
LE01Gene04078	3.31139	1.72744	1.84387e-06	2.07272e-05	yes	up	_
LE01Gene00887	3.81297	1.93091	1.86327e-06	2.09246e-05	yes	up	_
LE01Gene03124	3.60725	1.8509	1.87683e-06	2.1056e-05	yes	up	_
LE01Gene04895	2.13113	1.09162	1.88652e-06	2.11439e-05	yes	up	_
LE01Gene10471	2.14669	1.10212	1.88977e-06	2.11595e-05	yes	up	_
LE01Gene11477	1.88093	0.911442	1.89314e-06	2.11764e-05	yes	up	RecName: Full=Protein piccolo; AltName: Full=Aczonin; AltName: Full=Brain-derived HLMN protein; AltName: Full=Multidomain presynaptic cytomatrix protein
LE01Gene13809	1.69097	0.757847	1.96841e-06	2.19967e-05	yes	up	RecName: Full=Elongator complex protein 1; AltName: Full=Gamma-toxin target 1; AltName: Full=Protein IKI3
LE01Gene05885	0.618696	-0.692698	1.97052e-06	2.19986e-05	yes	down	RecName: Full=UBA domain-containing protein 3
LE01Gene05462	1.8574	0.893288	1.97518e-06	2.20291e-05	yes	up	RecName: Full=Momilactone A synthase; Short=OsMAS
LE01Gene01236	2.17401	1.12036	1.9774e-06	2.20322e-05	yes	up	_
LE01Gene12599	0.252649	-1.9848	1.99027e-06	2.21539e-05	yes	down	_
LE01Gene06340	2.21639	1.14821	2.01763e-06	2.24146e-05	yes	up	_
LE01Gene13409	0.43933	-1.18662	2.02075e-06	2.24274e-05	yes	down	RecName: Full=Nascent polypeptide-associated complex subunit beta; Short=NAC-beta; AltName: Full=Beta-NAC
LE01Gene10514	0.457925	-1.12682	2.05796e-06	2.28181e-05	yes	down	_
LE01Gene06023	0.340838	-1.55284	2.06073e-06	2.28266e-05	yes	down	RecName: Full=Ketol-acid reductoisomerase, mitochondrial; AltName: Full=Acetohydroxy-acid reductoisomerase; AltName: Full=Alpha-keto-beta-hydroxylacyl reductoisomer
LE01Gene06540	0.386745	-1.37055	2.09571e-06	2.31914e-05	yes	down	_
LE01Gene11883	0.487583	-1.03628	2.09938e-06	2.32094e-05	yes	down	_
LE01Gene03816	0.512306	-0.964924	2.12581e-06	2.3456e-05	yes	down	_
LE01Gene01135	1.89362	0.921148	2.12377e-06	2.3456e-05	yes	up	RecName: Full=Citrate synthase, peroxisomal; Flags: Precursor
LE01Gene11655	3.09264	1.62884	2.13794e-06	2.3567e-05	yes	up	_
LE01Gene10653	1.89269	0.920438	2.14396e-06	2.36105e-05	yes	up	RecName: Full=Probable low-specificity L-threonine aldolase
LE01Gene08878	0.609691	-0.71385	2.15827e-06	2.37451e-05	yes	down	RecName: Full=Ras-related protein Rab-11B; AltName: Full=ORA3; Flags: Precursor
LE01Gene13320	2.18481	1.12751	2.16441e-06	2.37897e-05	yes	up	RecName: Full=Sec14 cytosolic factor; AltName: Full=Phosphatidylinositol/phosphatidyl-choline transfer protein; Short=PI/PC TP; AltName: Full=Sporulation-specific p
LE01Gene07790	0.52174	-0.938598	2.17574e-06	2.38912e-05	yes	down	RecName: Full=ATP-dependent RNA helicase ded1; AltName: Full=DEAD box RNA helicase 9
LE01Gene02277	0.366464	-1.44826	2.17908e-06	2.39047e-05	yes	down	RecName: Full=Protein YIPF5 homolog
LE01Gene04468	0.569505	-0.81222	2.19817e-06	2.40909e-05	yes	down	RecName: Full=O-methylsterigmatocystin oxidoreductase; Short=OMST oxidoreductase; AltName: Full=Aflatoxin B synthase; AltName: Full=Aflatoxin biosynthesis protein Q;
LE01Gene13399	0.266408	-1.90829	2.22453e-06	2.43479e-05	yes	down	RecName: Full=Mitochondrial acidic protein mam33; Flags: Precursor
LE01Gene00102	2.11332	1.07951	2.2259e-06	2.43479e-05	yes	up	_
LE01Gene05394	0.528574	-0.919824	2.24399e-06	2.45222e-05	yes	down	RecName: Full=Probable DNA-directed RNA polymerase III subunit rpc6; Short=RNA polymerase III subunit C6; AltName: Full=DNA-directed RNA polymerase III 34 kDa polype
LE01Gene07180	2.53389	1.34135	2.26707e-06	2.47507e-05	yes	up	_
LE01Gene00881	0.398395	-1.32773	2.27981e-06	2.48624e-05	yes	down	RecName: Full=RNA 3'-terminal phosphate cyclase-like protein
LE01Gene00335	1.60923	0.686368	2.28167e-06	2.48624e-05	yes	up	_
LE01Gene12819	0.375111	-1.41461	2.31921e-06	2.52472e-05	yes	down	_
LE01Gene08749	0.416657	-1.26307	2.32449e-06	2.52805e-05	yes	down	RecName: Full=Hydroxymethylglutaryl-CoA synthase A; Short=HMG-CoA synthase A; AltName: Full=3-hydroxy-3-methylglutaryl coenzyme A synthase A
LE01Gene00408	2.72877	1.44825	2.33555e-06	2.53765e-05	yes	up	RecName: Full=Pyridoxal reductase; Short=PL reductase; Short=PL-red
LE01Gene11793	4.05216	2.01869	2.37427e-06	2.57726e-05	yes	up	RecName: Full=Tripeptidyl-peptidase sed3; AltName: Full=Sedolisin-C; Flags: Precursor
LE01Gene03501	0.284951	-1.81121	2.41622e-06	2.6203e-05	yes	down	_
LE01Gene07909	1.98175	0.986773	2.43599e-06	2.63922e-05	yes	up	_
LE01Gene09771	0.471626	-1.08429	2.43859e-06	2.63953e-05	yes	down	_
LE01Gene08884	5.10605	2.35221	2.45404e-06	2.65372e-05	yes	up	_
LE01Gene05964	2.36791	1.24362	2.47523e-06	2.67192e-05	yes	up	RecName: Full=Zinc finger C2H2 protein ECU08_0560
LE01Gene07223	1.74062	0.799603	2.47556e-06	2.67192e-05	yes	up	_
LE01Gene05248	0.379424	-1.39812	2.47954e-06	2.67368e-05	yes	down	RecName: Full=Demethylrebeccamycin-D-glucose O-methyltransferase; AltName: Full=Rebeccamycin O-methyltransferase; AltName: Full=Rebeccamycin sugar 4'-O-methyltrans
LE01Gene07362	0.441529	-1.17942	2.54025e-06	2.73395e-05	yes	down	RecName: Full=Glucosidase 2 subunit beta; AltName: Full=Alpha-glucosidase 2 subunit beta; Flags: Precursor
LE01Gene02151	3.07702	1.62153	2.54813e-06	2.73984e-05	yes	up	_
LE01Gene07628	1.75794	0.813887	2.56605e-06	2.7565e-05	yes	up	_
LE01Gene09837	2.29505	1.19852	2.59092e-06	2.77797e-05	yes	up	RecName: Full=Uncharacterized oxidoreductase C162.03
LE01Gene03513	1.71581	0.778886	2.5895e-06	2.77797e-05	yes	up	_
LE01Gene04299	1.82462	0.867598	2.60013e-06	2.78522e-05	yes	up	RecName: Full=Calmodulin; Short=CaM
LE01Gene11490	2.68691	1.42595	2.60955e-06	2.79268e-05	yes	up	_
LE01Gene00970	2.27789	1.1877	2.6228e-06	2.80422e-05	yes	up	_
LE01Gene06014	0.568134	-0.815697	2.63401e-06	2.81356e-05	yes	down	RecName: Full=Endopolygalacturonase I; AltName: Full=Pectinase 1; AltName: Full=Polygalacturonase I; Short=PG-I; Flags: Precursor
LE01Gene13301	0.262459	-1.92983	2.72931e-06	2.9099e-05	yes	down	RecName: Full=Histone H4 H4_AGABI RecName: Full=Histone H4
LE01Gene04053	2.26835	1.18164	2.73225e-06	2.9103e-05	yes	up	RecName: Full=Uncharacterized histidine-rich protein DDB_G0274557; Flags: Precursor
LE01Gene09284	0.664029	-0.590682	2.7908e-06	2.96989e-05	yes	down	RecName: Full=Solute carrier family 25 member 38 homolog
LE01Gene14405	0.276161	-1.85642	2.81936e-06	2.99748e-05	yes	down	_
LE01Gene14057	4.29388	2.10228	2.83667e-06	3.01306e-05	yes	up	_
LE01Gene11646	1.91894	0.940312	2.8398e-06	3.01358e-05	yes	up	RecName: Full=Lactose permease
LE01Gene02453	2.94289	1.55723	2.85267e-06	3.0216e-05	yes	up	_
LE01Gene07813	2.34533	1.22979	2.85134e-06	3.0216e-05	yes	up	RecName: Full=Cytochrome P450 10; AltName: Full=CYPX
LE01Gene07645	0.369786	-1.43524	2.87478e-06	3.04219e-05	yes	down	RecName: Full=Mitochondrial genome maintenance protein mgm101; Flags: Precursor
LE01Gene09423	4.05738	2.02055	2.89243e-06	3.05802e-05	yes	up	_
LE01Gene10685	0.500958	-0.99724	2.93266e-06	3.09768e-05	yes	down	RecName: Full=Succinyl-CoA ligase
LE01Gene01486	0.481923	-1.05312	2.9544e-06	3.11774e-05	yes	down	_
LE01Gene01390	0.451266	-1.14795	2.96356e-06	3.12451e-05	yes	down	RecName: Full=Farnesyl pyrophosphate synthase; Short=FPP synthase; Short=FPS; AltName: Full=(2E,6E)-farnesyl diphosphate synthase; AltName: Full=Dimethylallyltranstra
LE01Gene11103	0.499748	-1.00073	3.00916e-06	3.16965e-05	yes	down	RecName: Full=Abhydrolase domain-containing protein 12B
LE01Gene06881	1.74588	0.803954	3.02075e-06	3.17892e-05	yes	up	RecName: Full=Anthranilate phosphoribosyltransferase
LE01Gene04877	0.536988	-0.897037	3.03298e-06	3.18883e-05	yes	down	RecName: Full=UPF0652 protein
LE01Gene09308	4.15678	2.05547	3.06041e-06	3.2147e-05	yes	up	RecName: Full=Tripeptidyl-peptidase 1; Short=TPP-1; AltName: Full=Tripeptidyl aminopeptidase; AltName: Full=Tripeptidyl-peptidase I; Short=TPP-I; Flags: Precursor
LE01Gene01673	0.519221	-0.94558	3.06371e-06	3.2152e-05	yes	down	RecName: Full=DNA damage checkpoint protein rad24
LE01Gene05897	0.505394	-0.984519	3.08312e-06	3.23259e-05	yes	down	_
LE01Gene01970	0.479806	-1.05948	3.10798e-06	3.25565e-05	yes	down	RecName: Full=Peptidyl-prolyl cis-trans isomerase B; Short=PPIase B; AltName: Full=Rotamase B; Flags: Precursor
LE01Gene12295	0.402612	-1.31254	3.1169e-06	3.262e-05	yes	down	_
LE01Gene07304	4.98771	2.31838	3.14842e-06	3.28603e-05	yes	up	_
LE01Gene03168	1.69969	0.765276	3.14685e-06	3.28603e-05	yes	up	RecName: Full=mRNA decapping complex subunit 2
LE01Gene10977	1.96379	0.973638	3.14853e-06	3.28603e-05	yes	up	RecName: Full=Peroxisome biogenesis protein 19-1; AltName: Full=Peroxin-19-1; Short=AtPEX19-1; AltName: Full=Peroxisomal membrane protein import receptor PEX19-1;
LE01Gene11387	0.530762	-0.913863	3.16948e-06	3.30486e-05	yes	down	RecName: Full=SUMO-activating enzyme subunit 1; AltName: Full=Ubiquitin-like 1-activating enzyme E1A
LE01Gene07743	1.8358	0.876412	3.18854e-06	3.31865e-05	yes	up	_
LE01Gene00475	3.40164	1.76623	3.18796e-06	3.31865e-05	yes	up	RecName: Full=Calcium and calcium/calmodulin-dependent serine/threonine-protein kinase; Short=LlCCaMK
LE01Gene10138	0.550082	-0.86228	3.2254e-06	3.35088e-05	yes	down	_
LE01Gene00450	0.53296	-0.9079	3.24467e-06	3.36479e-05	yes	down	RecName: Full=Syntaxin-5
LE01Gene11890	0.428095	-1.224	3.27771e-06	3.39592e-05	yes	down	RecName: Full=Probable 2-oxoglutarate-dependent dioxygenase DIN11; AltName: Full=Protein DARK-INDUCIBLE 11
LE01Gene10033	2.58778	1.37172	3.38888e-06	3.50791e-05	yes	up	_
LE01Gene07454	1.901	0.926758	3.39353e-06	3.50953e-05	yes	up	_
LE01Gene00774	0.393677	-1.34491	3.40919e-06	3.52252e-05	yes	down	RecName: Full=Histone H2B
LE01Gene08042	4.13196	2.04683	3.45576e-06	3.5674e-05	yes	up	_
LE01Gene11445	0.533143	-0.907405	3.5439e-06	3.65507e-05	yes	down	RecName: Full=Suppressor protein SRP40
LE01Gene04206	0.483325	-1.04893	3.55572e-06	3.66393e-05	yes	down	RecName: Full=Very-long-chain 3-oxoacyl-CoA reductase; AltName: Full=3-ketoacyl-CoA reductase; Short=3-ketoreductase; Short=KAR; AltName: Full=Microsomal beta-keto
LE01Gene00922	2.1719	1.11896	3.58091e-06	3.68655e-05	yes	up	RecName: Full=GATA zinc finger domain-containing protein 11; AltName: Full=Transcription factor amvA
LE01Gene05580	0.581651	-0.781774	3.61276e-06	3.71598e-05	yes	down	_
LE01Gene12156	1.78912	0.839248	3.6333e-06	3.73373e-05	yes	up	RecName: Full=Bacitracin synthase 3; Short=BA3; Includes: RecName: Full=ATP-dependent isoleucine adenylase; Short=IleA; AltName: Full=Isoleucine activase; Includes:
LE01Gene12940	0.585816	-0.771481	3.66231e-06	3.76015e-05	yes	down	_
LE01Gene10730	2.31673	1.21209	3.68212e-06	3.77708e-05	yes	up	_
LE01Gene01070	2.50561	1.32516	3.69001e-06	3.78176e-05	yes	up	_
LE01Gene11153	0.267206	-1.90398	3.73103e-06	3.82036e-05	yes	down	RecName: Full=O-methylsterigmatocystin oxidoreductase; Short=OMST oxidoreductase; AltName: Full=Aflatoxin B synthase; AltName: Full=Aflatoxin biosynthesis protein
LE01Gene10744	0.411949	-1.27946	3.74305e-06	3.82922e-05	yes	down	_
LE01Gene08493	0.494156	-1.01696	3.78091e-06	3.86416e-05	yes	down	_
LE01Gene10693	0.472102	-1.08283	3.784e-06	3.86416e-05	yes	down	_
LE01Gene01843	38.3782	5.26221	3.81002e-06	3.88725e-05	yes	up	RecName: Full=Probable glycosidase C21B10.07
LE01Gene00551	0.538484	-0.893025	3.82277e-06	3.89676e-05	yes	down	_
LE01Gene00854	2.30016	1.20173	3.8582e-06	3.92584e-05	yes	up	_
LE01Gene13326	0.54391	-0.878561	3.8571e-06	3.92584e-05	yes	down	_
LE01Gene13982	0.626262	-0.675163	3.86939e-06	3.9337e-05	yes	down	RecName: Full=Flap endonuclease 1; Short=FEN-1; AltName: Full=Flap structure-specific endonuclease 1
LE01Gene10328	0.473396	-1.07888	3.90469e-06	3.96474e-05	yes	down	RecName: Full=Peptidyl-prolyl cis-trans isomerase cyp11; Short=PPIase cyp11; AltName: Full=Cyclophilin cyp11; AltName: Full=Rotamase cyp11
LE01Gene07804	0.443394	-1.17334	3.90688e-06	3.96474e-05	yes	down	_
LE01Gene12207	1.71865	0.781275	3.92911e-06	3.98039e-05	yes	up	_
LE01Gene08161	1.87057	0.903476	3.9293e-06	3.98039e-05	yes	up	_
LE01Gene12999	0.470644	-1.08729	3.94335e-06	3.99106e-05	yes	down	RecName: Full=Nucleolar protein 9; AltName: Full=Pumilio domain-containing protein NOP9
LE01Gene11929	6.38786	2.67533	3.96124e-06	4.0056e-05	yes	up	_
LE01Gene10321	0.535691	-0.900526	3.9845e-06	4.02555e-05	yes	down	RecName: Full=Pre-mRNA-splicing factor 18; AltName: Full=PRP18 homolog
LE01Gene05184	0.568701	-0.814258	3.99154e-06	4.02908e-05	yes	down	RecName: Full=UDP-glucose:glycoprotein glucosyltransferase; Short=UGT; Short=dUGT; AltName: Full=UDP--Glc:glycoprotein glucosyltransferase; Flags: Precursor
LE01Gene01527	54.5691	5.77001	4.01835e-06	4.05255e-05	yes	up	RecName: Full=Negative regulator of sexual conjugation and meiosis
LE01Gene06217	2.79331	1.48197	4.03574e-06	4.06649e-05	yes	up	_
LE01Gene09005	0.148991	-2.7467	4.09335e-06	4.12088e-05	yes	down	_
LE01Gene08693	2.3365	1.22435	4.0971e-06	4.121e-05	yes	up	_
LE01Gene03184	2.56296	1.35781	4.11981e-06	4.14019e-05	yes	up	RecName: Full=Glucose-6-phosphate 1-epimerase; AltName: Full=D-hexose-6-phosphate mutarotase
LE01Gene03247	2.19414	1.13365	4.17528e-06	4.18966e-05	yes	up	RecName: Full=Uncharacterized protein YNL108C
LE01Gene04465	0.15919	-2.65118	4.1764e-06	4.18966e-05	yes	down	_
LE01Gene08397	1.86032	0.895553	4.20374e-06	4.21337e-05	yes	up	RecName: Full=Putative 6-phosphofructo-2-kinase/fructose-2,6-bisphosphatase YLR345W; Includes: RecName: Full=6-phosphofructo-2-kinase; Includes: RecName: Full=Fruc
LE01Gene01182	2.01969	1.01413	4.21307e-06	4.21901e-05	yes	up	_
LE01Gene01663	0.620817	-0.68776	4.23147e-06	4.2337e-05	yes	down	RecName: Full=Peroxisomal membrane protein PMP47B
LE01Gene01717	1.56118	0.642637	4.25162e-06	4.24901e-05	yes	up	RecName: Full=Uncharacterized transporter YutK
LE01Gene09429	2.74084	1.45462	4.271e-06	4.262e-05	yes	up	RecName: Full=Glucoamylase 1; AltName: Full=1,4-alpha-D-glucan glucohydrolase; AltName: Full=Glucan 1,4-alpha-glucosidase; Flags: Precursor
LE01Gene05806	0.568972	-0.81357	4.29361e-06	4.28082e-05	yes	down	RecName: Full=Protein PBDC1 homolog
LE01Gene09387	3.92531	1.97281	4.30113e-06	4.28456e-05	yes	up	RecName: Full=L-fucose permease
LE01Gene05007	3.24542	1.69841	4.3113e-06	4.29094e-05	yes	up	RecName: Full=Thioredoxin-like protein 4A; AltName: Full=DIM1 protein homolog; AltName: Full=Spliceosomal U5 snRNP-specific 15 kDa protein; AltName: Full=Thioredox
LE01Gene09691	10.1261	3.34001	4.33346e-06	4.30921e-05	yes	up	_
LE01Gene05873	0.421046	-1.24795	4.36836e-06	4.34013e-05	yes	down	RecName: Full=Uncharacterized ATP-dependent helicase C23E6.02
LE01Gene11231	0.566365	-0.820196	4.45834e-06	4.42566e-05	yes	down	_
LE01Gene08227	0.541702	-0.88443	4.49617e-06	4.45932e-05	yes	down	RecName: Full=Endoglucanase E-4; AltName: Full=Cellulase E-4; AltName: Full=Cellulase E4; AltName: Full=Endo-1,4-beta-glucanase E-4; Flags: Precursor
LE01Gene02502	9.01164	3.17179	4.51213e-06	4.47126e-05	yes	up	_
LE01Gene03176	0.421112	-1.24772	4.52708e-06	4.48217e-05	yes	down	RecName: Full=Putative elongation of fatty acids protein 1; AltName: Full=3-keto acyl-CoA synthase SPAC1B2.03c; AltName: Full=Very-long-chain 3-oxoacyl-CoA synthas
LE01Gene10655	0.380462	-1.39418	4.54388e-06	4.49098e-05	yes	down	RecName: Full=Mitochondrial import inner membrane translocase subunit TIM10
LE01Gene04226	0.555412	-0.84837	4.54367e-06	4.49098e-05	yes	down	_
LE01Gene07302	0.55566	-0.847726	4.61969e-06	4.54707e-05	yes	down	RecName: Full=Homocitrate dehydratase, mitochondrial; AltName: Full=Aconitase 2; Flags: Precursor
LE01Gene04817	1.58715	0.666438	4.61751e-06	4.54707e-05	yes	up	RecName: Full=3'(2'),5'-bisphosphate nucleotidase; AltName: Full=3'(2'),5-bisphosphonucleoside 3'(2')-phosphohydrolase; AltName: Full=DPNPase; AltName: Full=Halotol
LE01Gene12023	2.34296	1.22833	4.61492e-06	4.54707e-05	yes	up	_
LE01Gene07581	2.13414	1.09365	4.62462e-06	4.54707e-05	yes	up	_
LE01Gene12541	0.484648	-1.04499	4.6241e-06	4.54707e-05	yes	down	RecName: Full=Uncharacterized MFS-type transporter YusP
LE01Gene10036	2.80538	1.4882	4.63638e-06	4.55471e-05	yes	up	_
LE01Gene05453	4.50295	2.17087	4.66768e-06	4.5815e-05	yes	up	RecName: Full=E3 ubiquitin-protein ligase CCNB1IP1; AltName: Full=Cyclin-B1-interacting protein 1
LE01Gene06512	2.32269	1.2158	4.69724e-06	4.60654e-05	yes	up	RecName: Full=Diacetyl reductase
LE01Gene03965	0.428537	-1.22251	4.71191e-06	4.61694e-05	yes	down	RecName: Full=(S)-coclaurine N-methyltransferase; Short=TfCNMT
LE01Gene02701	2.1741	1.12042	4.78599e-06	4.68549e-05	yes	up	_
LE01Gene05484	0.557444	-0.843102	4.82568e-06	4.71624e-05	yes	down	_
LE01Gene05691	0.251749	-1.98994	4.82203e-06	4.71624e-05	yes	down	_
LE01Gene08955	0.550877	-0.860199	4.8476e-06	4.73359e-05	yes	down	RecName: Full=Striatin-3
LE01Gene14394	0.619061	-0.691846	4.86206e-06	4.74364e-05	yes	down	RecName: Full=N-alpha-acetyltransferase 20; AltName: Full=Methionine N-acetyltransferase; AltName: Full=N-acetyltransferase 5; AltName: Full=N-terminal acetyltrans
LE01Gene04774	0.541426	-0.885164	4.87901e-06	4.75609e-05	yes	down	_
LE01Gene08268	0.508156	-0.976658	4.93614e-06	4.80355e-05	yes	down	RecName: Full=U3 small nucleolar RNA-associated protein 12; Short=U3 snoRNA-associated protein 12; AltName: Full=DOM34-interacting protein 2; AltName: Full=U three
LE01Gene07232	1.6256	0.700977	4.94122e-06	4.80439e-05	yes	up	_
LE01Gene09292	2.46374	1.30085	4.94737e-06	4.80626e-05	yes	up	_
LE01Gene05226	7.14033	2.83599	4.9526e-06	4.80723e-05	yes	up	_
LE01Gene08446	15.4623	3.95068	4.97285e-06	4.82277e-05	yes	up	_
LE01Gene00553	0.486825	-1.03853	4.98219e-06	4.82772e-05	yes	down	_
LE01Gene02685	0.600945	-0.734695	5.019e-06	4.85562e-05	yes	down	_
LE01Gene12219	1.85756	0.893407	5.01952e-06	4.85562e-05	yes	up	_
LE01Gene05686	3.82795	1.93657	5.03761e-06	4.86898e-05	yes	up	RecName: Full=Killer toxin subunits alpha/beta; AltName: Full=RF2 protein; Contains: RecName: Full=Killer toxin subunit alpha; Contains: RecName: Full=Killer toxin su
LE01Gene03027	0.421344	-1.24693	5.09563e-06	4.92087e-05	yes	down	RecName: Full=54S ribosomal protein L38, mitochondrial
LE01Gene04354	1.64326	0.716557	5.1013e-06	4.92217e-05	yes	up	_
LE01Gene11710	1.82117	0.864865	5.1254e-06	4.94124e-05	yes	up	_
LE01Gene04576	2.37479	1.2478	5.15964e-06	4.97003e-05	yes	up	_
LE01Gene11038	0.305829	-1.7092	5.26455e-06	5.06679e-05	yes	down	RecName: Full=10 kDa heat shock protein, mitochondrial; Short=HSP10; AltName: Full=10 kDa chaperonin
LE01Gene10877	3.78139	1.91892	5.28802e-06	5.08508e-05	yes	up	RecName: Full=Aromatic peroxygenase
LE01Gene03653	0.627788	-0.671652	5.30432e-06	5.09645e-05	yes	down	RecName: Full=Ubiquitin-conjugating enzyme E2 S-B; AltName: Full=Ubiquitin carrier protein S-B; AltName: Full=Ubiquitin-protein ligase S-B
LE01Gene12420	2.67569	1.41991	5.33316e-06	5.11983e-05	yes	up	_
LE01Gene09628	2.88231	1.52723	5.36073e-06	5.14197e-05	yes	up	_
LE01Gene03214	0.4806	-1.05709	5.38467e-06	5.16058e-05	yes	down	RecName: Full=Protein priA; Flags: Precursor
LE01Gene01984	0.492886	-1.02068	5.45822e-06	5.22631e-05	yes	down	RecName: Full=Delta-aminolevulinic acid dehydratase; Short=ALADH; AltName: Full=Porphobilinogen synthase
LE01Gene09743	0.294777	-1.7623	5.4668e-06	5.22631e-05	yes	down	RecName: Full=Delta(24(24(1)))-sterol reductase; AltName: Full=C-24(28) sterol reductase; AltName: Full=Sterol Delta(24(28))-reductase
LE01Gene06610	0.476694	-1.06886	5.46705e-06	5.22631e-05	yes	down	RecName: Full=ATP synthase subunit beta, mitochondrial; Flags: Precursor
LE01Gene08954	0.387594	-1.36738	5.48142e-06	5.23565e-05	yes	down	RecName: Full=Translation machinery-associated protein 7 homolog; AltName: Full=Coiled-coil domain-containing protein 72 homolog
LE01Gene00313	0.552601	-0.855689	5.49305e-06	5.24236e-05	yes	down	_
LE01Gene13471	0.603619	-0.728289	5.52944e-06	5.27267e-05	yes	down	RecName: Full=Ras-related protein RABH1b; Short=AtRABH1b; AltName: Full=Ras-related protein Rab6A; Short=AtRab6A
LE01Gene09505	1.68563	0.753284	5.56252e-06	5.29977e-05	yes	up	RecName: Full=Deoxyhypusine hydroxylase; Short=DOHH; AltName: Full=Deoxyhypusine dioxygenase; AltName: Full=Deoxyhypusine monooxygenase
LE01Gene07506	0.351908	-1.50673	5.57185e-06	5.30422e-05	yes	down	RecName: Full=Mitochondrial GTP/GDP carrier protein 1
LE01Gene13805	0.665165	-0.588216	5.58325e-06	5.31062e-05	yes	down	_
LE01Gene13991	1.61895	0.695059	5.60415e-06	5.32605e-05	yes	up	_
LE01Gene06035	4.28629	2.09973	5.61941e-06	5.3361e-05	yes	up	_
LE01Gene01696	2.23051	1.15737	5.66296e-06	5.37092e-05	yes	up	_
LE01Gene11230	1.56016	0.641692	5.70408e-06	5.40297e-05	yes	up	_
LE01Gene08200	2.38544	1.25425	5.72887e-06	5.42193e-05	yes	up	_
LE01Gene07112	4.06763	2.02419	5.73665e-06	5.42478e-05	yes	up	RecName: Full=Sorbose reductase sou1; AltName: Full=Sorbitol utilization protein sou1
LE01Gene01378	4.14536	2.0515	5.75081e-06	5.43366e-05	yes	up	RecName: Full=N-terminal acetyltransferase A complex catalytic subunit ard1; Short=NatA complex subunit ARD1
LE01Gene02296	0.372665	-1.42405	5.77594e-06	5.45287e-05	yes	down	_
LE01Gene11579	0.454807	-1.13667	5.87575e-06	5.53101e-05	yes	down	_
LE01Gene07297	3.71205	1.89221	5.87816e-06	5.53101e-05	yes	up	RecName: Full=A-agglutinin anchorage subunit; AltName: Full=A-agglutinin cell wall attachment subunit; Flags: Precursor
LE01Gene03924	0.449883	-1.15238	5.91903e-06	5.56028e-05	yes	down	RecName: Full=UPF0743 protein YCR087C-A
LE01Gene12864	0.475769	-1.07167	5.97695e-06	5.61005e-05	yes	down	RecName: Full=Exoglucanase; AltName: Full=1,4-beta-cellobiohydrolase; AltName: Full=Beta-glucancellobiohydrolase; AltName: Full=Exocellobiohydrolase; Flags: Precurso
LE01Gene03851	0.00546609	-7.51528	6.00539e-06	5.6321e-05	yes	down	_
LE01Gene10674	1.90064	0.926482	6.0364e-06	5.65652e-05	yes	up	RecName: Full=Protein yippee-like At3g08990
LE01Gene14440	2.56582	1.35942	6.0509e-06	5.66543e-05	yes	up	RecName: Full=Alternative oxidase, mitochondrial; Flags: Precursor
LE01Gene06513	2.76751	1.46859	6.18977e-06	5.7907e-05	yes	up	_
LE01Gene06747	2.4489	1.29213	6.21286e-06	5.80752e-05	yes	up	RecName: Full=Fatty aldehyde dehydrogenase; AltName: Full=Aldehyde dehydrogenase 10; AltName: Full=Aldehyde dehydrogenase family 3 member A2; AltName: Full=Microsom
LE01Gene05581	1.97451	0.981495	6.24569e-06	5.83341e-05	yes	up	_
LE01Gene11558	6.57798	2.71765	6.27749e-06	5.8583e-05	yes	up	_
LE01Gene08075	0.574349	-0.799999	6.30022e-06	5.8747e-05	yes	down	RecName: Full=Cytochrome b-c1 complex subunit Rieske, mitochondrial; AltName: Full=Complex III subunit 5; AltName: Full=Rieske iron-sulfur protein; Short=RISP; AltNam
LE01Gene03066	2.82094	1.49618	6.3385e-06	5.90555e-05	yes	up	RecName: Full=Uncharacterized protein C11G11.07
LE01Gene05305	0.634945	-0.655298	6.52415e-06	6.07355e-05	yes	down	RecName: Full=Wiskott-Aldrich syndrome protein family member 2; Short=WASP family protein member 2; AltName: Full=Protein WAVE-2; AltName: Full=Verprolin homology
LE01Gene08422	8.82394	3.14142	6.53763e-06	6.07615e-05	yes	up	_
LE01Gene09588	1.83266	0.873936	6.53601e-06	6.07615e-05	yes	up	_
LE01Gene00871	618.3	9.27216	6.59021e-06	6.12002e-05	yes	up	_
LE01Gene05612	0.612755	-0.706618	6.61416e-06	6.13725e-05	yes	down	_
LE01Gene09806	7.96228	2.99318	6.65025e-06	6.16571e-05	yes	up	_
LE01Gene13248	1.68008	0.748527	6.66002e-06	6.16974e-05	yes	up	RecName: Full=Probable proline dehydrogenase 2; AltName: Full=Kidney and liver proline oxidase 1; AltName: Full=MmPOX1; AltName: Full=Probable proline oxidase 2; A
LE01Gene01080	2.78096	1.47558	6.78406e-06	6.27953e-05	yes	up	_
LE01Gene03585	0.450893	-1.14914	6.82502e-06	6.31231e-05	yes	down	RecName: Full=ATP synthase subunit alpha, mitochondrial; Flags: Precursor
LE01Gene02678	3.94924	1.98158	6.92753e-06	6.3975e-05	yes	up	RecName: Full=Pyranose 2-oxidase; Short=P2Ox; Short=POD; Short=POx; Short=PROD; Short=Pyranose oxidase; AltName: Full=FAD-oxidoreductase; AltName: Full=Glucose 2-ox
LE01Gene12546	0.404661	-1.30522	6.92838e-06	6.3975e-05	yes	down	_
LE01Gene11249	2.07131	1.05055	7.02291e-06	6.47953e-05	yes	up	_
LE01Gene13730	6.16459	2.624	7.1068e-06	6.54632e-05	yes	up	RecName: Full=Serine/threonine-protein kinase HSL1
LE01Gene05186	12.0497	3.59093	7.10671e-06	6.54632e-05	yes	up	RecName: Full=Polyporopepsin; AltName: Full=Aspartic proteinase
LE01Gene04279	2.26164	1.17737	7.12485e-06	6.55763e-05	yes	up	RecName: Full=Probable alpha-fucosidase A; AltName: Full=Alpha-L-fucoside fucohydrolase A; Flags: Precursor
LE01Gene11524	1.70611	0.770707	7.13072e-06	6.55773e-05	yes	up	RecName: Full=NAD-dependent protein deacetylase hst2-1; AltName: Full=Homologous to SIR2 protein 2-1; AltName: Full=Regulatory protein SIR2 homolog 2-1
LE01Gene04173	1.90561	0.930254	7.14516e-06	6.56569e-05	yes	up	RecName: Full=Mitogen-activated protein kinase SLT2/MPK1; Short=MAP kinase MPK1
LE01Gene11051	7.97565	2.9956	7.26603e-06	6.67137e-05	yes	up	_
LE01Gene02086	0.608796	-0.715969	7.29785e-06	6.69519e-05	yes	down	RecName: Full=Eukaryotic translation initiation factor 4G; Short=eIF-4G; Short=eIF4G; AltName: Full=Eukaryotic initiation factor 4F subunit p220; Short=eIF-4F p220
LE01Gene07685	0.40077	-1.31915	7.31608e-06	6.70651e-05	yes	down	_
LE01Gene08837	0.13342	-2.90595	7.37363e-06	6.75382e-05	yes	down	RecName: Full=Cytokinin riboside 5'-monophosphate phosphoribohydrolase LOG2; AltName: Full=Protein LONELY GUY 2
LE01Gene03694	2.10032	1.07061	7.39056e-06	6.76388e-05	yes	up	RecName: Full=Choline-phosphate cytidylyltransferase 1; Short=AtCCT1; AltName: Full=CTP:phosphocholine cytidylyltransferase 1; AltName: Full=Phosphorylcholine trans
LE01Gene03830	0.555976	-0.846905	7.41182e-06	6.77788e-05	yes	down	RecName: Full=Protein CWC15 homolog
LE01Gene13889	0.445755	-1.16568	7.43081e-06	6.78979e-05	yes	down	_
LE01Gene11922	0.48925	-1.03136	7.47333e-06	6.82316e-05	yes	down	_
LE01Gene02006	3.69107	1.88404	7.59466e-06	6.92283e-05	yes	up	_
LE01Gene04463	0.50059	-0.998299	7.5887e-06	6.92283e-05	yes	down	_
LE01Gene00824	2.40131	1.26382	7.68989e-06	7.00402e-05	yes	up	_
LE01Gene11481	0.660957	-0.597372	7.73133e-06	7.03613e-05	yes	down	RecName: Full=Putative phospho-2-dehydro-3-deoxyheptonate aldolase; AltName: Full=3-deoxy-D-arabino-heptulosonate 7-phosphate synthase; AltName: Full=DAHP synthase;
LE01Gene02586	0.489273	-1.03129	7.77588e-06	7.07102e-05	yes	down	_
LE01Gene07616	4.06038	2.02161	7.84055e-06	7.12413e-05	yes	up	RecName: Full=Uncharacterized urease accessory protein ureG-like
LE01Gene09850	0.589539	-0.762341	7.89748e-06	7.17013e-05	yes	down	RecName: Full=Mitochondrial 37S ribosomal protein S27
LE01Gene04205	2.30529	1.20495	7.91438e-06	7.17974e-05	yes	up	RecName: Full=Tyrosine decarboxylase 1
LE01Gene09654	0.530043	-0.915819	8.01394e-06	7.25849e-05	yes	down	RecName: Full=50S ribosomal protein L28
LE01Gene12265	23.4936	4.55419	8.02957e-06	7.26685e-05	yes	up	_
LE01Gene00009	0.607692	-0.718587	8.08253e-06	7.30316e-05	yes	down	_
LE01Gene11085	0.480601	-1.05709	8.07749e-06	7.30316e-05	yes	down	_
LE01Gene14706	1.51052	0.595043	8.21517e-06	7.41712e-05	yes	up	_
LE01Gene05363	0.339071	-1.56034	8.25206e-06	7.44452e-05	yes	down	RecName: Full=Salicylate hydroxylase; AltName: Full=Salicylate 1-monooxygenase
LE01Gene01520	1.87537	0.907173	8.30388e-06	7.48533e-05	yes	up	RecName: Full=Phenylalanine--tRNA ligase beta subunit; AltName: Full=Phenylalanyl-tRNA synthetase beta subunit; Short=PheRS
LE01Gene11054	2.41805	1.27385	8.36662e-06	7.52996e-05	yes	up	_
LE01Gene08330	0.483609	-1.04809	8.4165e-06	7.55691e-05	yes	down	RecName: Full=Laccase-2; AltName: Full=Benzenediol:oxygen oxidoreductase 2; AltName: Full=Diphenol oxidase 2; AltName: Full=Urishiol oxidase 2; Flags: Precursor
LE01Gene05323	2.19629	1.13507	8.41313e-06	7.55691e-05	yes	up	RecName: Full=Alpha-galactosidase 3; AltName: Full=Alpha-D-galactoside galactohydrolase 3; AltName: Full=Melibiase 3; Flags: Precursor
LE01Gene02823	0.264846	-1.91677	8.42508e-06	7.55866e-05	yes	down	RecName: Full=Transcription factor SKN7
LE01Gene12458	0.582827	-0.778861	8.46055e-06	7.58449e-05	yes	down	RecName: Full=Putative ATP-dependent helicase hrq1; AltName: Full=Homologous to recQ protein 1
LE01Gene13240	1.93153	0.94974	8.4996e-06	7.60954e-05	yes	up	_
LE01Gene14514	3.64743	1.86688	8.50187e-06	7.60954e-05	yes	up	_
LE01Gene02435	0.626559	-0.674479	8.63252e-06	7.71434e-05	yes	down	RecName: Full=Cytochrome b-c1 complex subunit 7; AltName: Full=Complex III subunit 7; AltName: Full=Ubiquinol-cytochrome c reductase complex 14 kDa protein
LE01Gene09511	2.20878	1.14325	8.66999e-06	7.72738e-05	yes	up	_
LE01Gene01394	2.59009	1.373	8.67428e-06	7.72738e-05	yes	up	_
LE01Gene13417	1.74411	0.802491	8.65662e-06	7.72738e-05	yes	up	_
LE01Gene12753	2.33863	1.22567	8.67329e-06	7.72738e-05	yes	up	RecName: Full=Putative amidase C869.01; Flags: Precursor
LE01Gene03150	1.5902	0.66921	8.69386e-06	7.73876e-05	yes	up	_
LE01Gene00653	2.8425	1.50716	8.71995e-06	7.75236e-05	yes	up	_
LE01Gene04033	0.436389	-1.19631	8.72277e-06	7.75236e-05	yes	down	RecName: Full=Ribosomal N-lysine methyltransferase 4; AltName: Full=SET domain-containing protein 7
LE01Gene07767	0.401286	-1.3173	8.76174e-06	7.78092e-05	yes	down	_
LE01Gene03037	0.496604	-1.00983	8.84436e-06	7.84816e-05	yes	down	RecName: Full=Vacuolar protein sorting-associated protein 29; AltName: Full=Vesicle protein sorting 29
LE01Gene02487	0.538346	-0.893396	8.89722e-06	7.88892e-05	yes	down	_
LE01Gene04010	4.75098	2.24822	8.90737e-06	7.89177e-05	yes	up	RecName: Full=Oxygen-dependent choline dehydrogenase 1; Short=CDH 1; Short=CHD 1; AltName: Full=Betaine aldehyde dehydrogenase 1; Short=BADH 1
LE01Gene08536	0.391401	-1.35328	8.94462e-06	7.9186e-05	yes	down	RecName: Full=Octanoyltransferase; AltName: Full=Lipoate-protein ligase B; AltName: Full=Lipoyl/octanoyl transferase; AltName: Full=Octanoyl-
LE01Gene11928	600.191	9.22928	8.95325e-06	7.92007e-05	yes	up	_
LE01Gene01542	0.588402	-0.765125	8.96073e-06	7.92053e-05	yes	down	RecName: Full=AP-1 complex subunit sigma-1; AltName: Full=Sigma1-adaptin; AltName: Full=Valproic acid-sensitive protein 2
LE01Gene06338	1.92398	0.944092	8.97619e-06	7.92804e-05	yes	up	RecName: Full=Hormonally up-regulated neu tumor-associated kinase
LE01Gene05930	4.46458	2.15853	9.02109e-06	7.96152e-05	yes	up	_
LE01Gene03418	0.47613	-1.07057	9.13065e-06	8.05196e-05	yes	down	RecName: Full=Probable cystathionine gamma-synthase; AltName: Full=O-succinylhomoserine (thiol)-lyase
LE01Gene01807	0.547614	-0.868768	9.18431e-06	8.09301e-05	yes	down	RecName: Full=Smr domain-containing protein C11H11.03c
LE01Gene03528	0.562795	-0.829318	9.20895e-06	8.10844e-05	yes	down	RecName: Full=Clathrin heavy chain 1
LE01Gene01789	0.542356	-0.882687	9.29108e-06	8.17443e-05	yes	down	RecName: Full=Probable methionine--tRNA ligase, mitochondrial; AltName: Full=Mitochondrial methionyl-tRNA synthetase; Short=MtMetRS; Flags: Precursor
LE01Gene09617	6.97946	2.80312	9.30184e-06	8.17757e-05	yes	up	_
LE01Gene01658	1.52415	0.608005	9.42738e-06	8.28154e-05	yes	up	_
LE01Gene09126	0.629453	-0.66783	9.50308e-06	8.34159e-05	yes	down	RecName: Full=RutC family protein PH0854
LE01Gene03470	0.483189	-1.04934	9.65954e-06	8.46791e-05	yes	down	RecName: Full=Cell wall alpha-1,3-glucan synthase mok13
LE01Gene02379	0.418309	-1.25736	9.66188e-06	8.46791e-05	yes	down	RecName: Full=H/ACA ribonucleoprotein complex subunit 1; AltName: Full=snoRNP protein GAR1
LE01Gene02362	10.4023	3.37883	9.68116e-06	8.47828e-05	yes	up	_
LE01Gene01574	0.536402	-0.898612	9.69336e-06	8.48244e-05	yes	down	RecName: Full=Isocitrate dehydrogenase
LE01Gene03461	0.46326	-1.1101	9.85177e-06	8.60937e-05	yes	down	RecName: Full=Eukaryotic translation initiation factor 3 subunit H; Short=eIF3h
LE01Gene08008	4.80031	2.26313	9.85356e-06	8.60937e-05	yes	up	_
LE01Gene01797	1.71781	0.780572	9.89219e-06	8.6365e-05	yes	up	RecName: Full=S-adenosylmethionine decarboxylase proenzyme; Short=AdoMetDC; Short=SAMDC; Contains: RecName: Full=S-adenosylmethionine decarboxylase alpha chain; Con
LE01Gene11305	23.8608	4.57657	9.98302e-06	8.70911e-05	yes	up	_
LE01Gene12307	0.607308	-0.719499	1.01896e-05	8.88254e-05	yes	down	_
LE01Gene13278	2.51035	1.32789	1.04025e-05	9.06115e-05	yes	up	RecName: Full=MutS protein homolog 4; Short=hMSH4
LE01Gene03569	2.09562	1.06738	1.0467e-05	9.11035e-05	yes	up	RecName: Full=Diphthamide biosynthesis protein 3
LE01Gene10954	0.43314	-1.20709	1.0485e-05	9.11903e-05	yes	down	RecName: Full=Vesicle transport protein GOT1B; AltName: Full=Golgi transport 1 homolog B
LE01Gene09833	2.44239	1.28829	1.05135e-05	9.13689e-05	yes	up	_
LE01Gene11329	2.22612	1.15453	1.06476e-05	9.24634e-05	yes	up	RecName: Full=Zinc-regulated transporter 1; AltName: Full=High-affinity zinc transport protein ZRT1
LE01Gene08900	0.627856	-0.671494	1.07073e-05	9.27995e-05	yes	down	RecName: Full=Coiled-coil domain-containing protein 94
LE01Gene14621	0.623118	-0.682422	1.07108e-05	9.27995e-05	yes	down	_
LE01Gene13813	2.34912	1.23212	1.07033e-05	9.27995e-05	yes	up	_
LE01Gene09552	2.32222	1.2155	1.0779e-05	9.33194e-05	yes	up	_
LE01Gene12018	1.86434	0.898668	1.08349e-05	9.37319e-05	yes	up	RecName: Full=UDP-glucose 4-epimerase; AltName: Full=Galactowaldenase; AltName: Full=UDP-galactose 4-epimerase
LE01Gene00213	1.93971	0.955839	1.09067e-05	9.42816e-05	yes	up	_
LE01Gene05778	0.56272	-0.829511	1.09367e-05	9.44688e-05	yes	down	RecName: Full=NADH-ubiquinone oxidoreductase 78 kDa subunit, mitochondrial; AltName: Full=Complex I-78kD; Short=CI-78kD; Flags: Precursor
LE01Gene06800	2.37078	1.24536	1.10057e-05	9.49929e-05	yes	up	RecName: Full=Mitomycin radical oxidase
LE01Gene07800	0.586964	-0.768657	1.10655e-05	9.54367e-05	yes	down	_
LE01Gene11394	0.428103	-1.22397	1.10861e-05	9.55417e-05	yes	down	RecName: Full=Sterol-4-alpha-carboxylate 3-dehydrogenase, decarboxylating
LE01Gene14017	0.21126	-2.24291	1.11628e-05	9.61303e-05	yes	down	_
LE01Gene03363	0.498537	-1.00423	1.11922e-05	9.63102e-05	yes	down	_
LE01Gene04644	2.35157	1.23363	1.12634e-05	9.68501e-05	yes	up	_
LE01Gene11648	1.77343	0.826544	1.12858e-05	9.69692e-05	yes	up	_
LE01Gene11447	2.02701	1.01935	1.13503e-05	9.74497e-05	yes	up	_
LE01Gene12746	3.92737	1.97356	1.14382e-05	9.81304e-05	yes	up	_
LE01Gene05017	1.75581	0.812139	1.15085e-05	9.86587e-05	yes	up	_
LE01Gene03615	1.82809	0.870333	1.18362e-05	0.000101392	yes	up	RecName: Full=TPR repeat-containing protein C19B12.01
LE01Gene03079	0.455082	-1.1358	1.18754e-05	0.000101651	yes	down	_
LE01Gene10240	3.44615	1.78499	1.19883e-05	0.00010254	yes	up	RecName: Full=Beta-hexosaminidase 2; AltName: Full=Beta-GlcNAcase 2; AltName: Full=Beta-N-acetylhexosaminidase 2; AltName: Full=Beta-hexosaminidase 3; Short=AtHEX3
LE01Gene00453	2.33546	1.2237	1.2114e-05	0.00010316	yes	up	RecName: Full=Bifunctional purine biosynthetic protein ADE1; Includes: RecName: Full=Phosphoribosylamine--glycine ligase; AltName: Full=Glycinamide ribonucleotide sy
LE01Gene00309	0.358967	-1.47808	1.20828e-05	0.00010316	yes	down	RecName: Full=Elongation factor Ts, mitochondrial; Short=EF-Ts; Short=EF-TsMt; Flags: Precursor
LE01Gene05947	0.346231	-1.53019	1.21198e-05	0.00010316	yes	down	_
LE01Gene12233	6.10663	2.61038	1.21131e-05	0.00010316	yes	up	RecName: Full=Xyloglucan-specific endo-beta-1,4-glucanase A; AltName: Full=Xyloglucanase A; AltName: Full=Xyloglucanendohydrolase A; Flags: Precursor
LE01Gene07153	2.0229	1.01642	1.21128e-05	0.00010316	yes	up	_
LE01Gene10128	2.72063	1.44394	1.21242e-05	0.00010316	yes	up	_
LE01Gene05491	0.616298	-0.6983	1.21376e-05	0.000103197	yes	down	_
LE01Gene01320	0.427035	-1.22757	1.21602e-05	0.000103312	yes	down	_
LE01Gene03938	0.441252	-1.18032	1.22195e-05	0.000103738	yes	down	_
LE01Gene12149	0.50675	-0.980654	1.22433e-05	0.000103863	yes	down	_
LE01Gene03245	0.617299	-0.695959	1.22966e-05	0.000104237	yes	down	RecName: Full=NADH dehydrogenase
LE01Gene02266	0.41345	-1.27421	1.24087e-05	0.000105031	yes	down	RecName: Full=Small nuclear ribonucleoprotein Sm D3; Short=Sm-D3; AltName: Full=snRNP core protein D3
LE01Gene08873	1.97569	0.982354	1.24381e-05	0.000105202	yes	up	RecName: Full=Dihydrolipoyllysine-residue acetyltransferase component of pyruvate dehydrogenase complex, mitochondrial; AltName: Full=Dihydrolipoamide acetyltransf
LE01Gene13510	1.88104	0.911529	1.24604e-05	0.000105311	yes	up	RecName: Full=Orotate phosphoribosyltransferase; Short=OPRT; Short=OPRTase
LE01Gene02363	2.74347	1.456	1.25657e-05	0.000105965	yes	up	_
LE01Gene06748	2.96533	1.56819	1.2565e-05	0.000105965	yes	up	_
LE01Gene01784	0.596245	-0.746023	1.26029e-05	0.0001062	yes	down	RecName: Full=Putative isoaspartyl peptidase/L-asparaginase; AltName: Full=Beta-aspartyl-peptidase; AltName: Full=Isoaspartyl dipeptidase; AltName: Full=L-asparagin
LE01Gene13912	2.08806	1.06216	1.26348e-05	0.00010639	yes	up	_
LE01Gene13909	2.82117	1.4963	1.27089e-05	0.000106935	yes	up	_
LE01Gene12111	0.621772	-0.685543	1.27276e-05	0.000106951	yes	down	_
LE01Gene07359	2.70049	1.43322	1.27295e-05	0.000106951	yes	up	RecName: Full=FGGY carbohydrate kinase domain-containing protein
LE01Gene06370	5.29526	2.4047	1.28219e-05	0.000107647	yes	up	_
LE01Gene11726	0.296218	-1.75527	1.28516e-05	0.000107738	yes	down	_
LE01Gene00182	1.97164	0.979396	1.28426e-05	0.000107738	yes	up	_
LE01Gene02186	0.630113	-0.666318	1.29287e-05	0.000108304	yes	down	RecName: Full=NADH dehydrogenase
LE01Gene03093	0.540417	-0.887855	1.30465e-05	0.00010921	yes	down	RecName: Full=D-3-phosphoglycerate dehydrogenase 2; Short=3-PGDH 2
LE01Gene04455	3.13292	1.64751	1.31706e-05	0.000110168	yes	up	_
LE01Gene04742	0.478997	-1.06191	1.32515e-05	0.000110764	yes	down	_
LE01Gene13268	0.4326	-1.20889	1.33532e-05	0.000111531	yes	down	_
LE01Gene07760	2.25313	1.17193	1.34499e-05	0.000112256	yes	up	RecName: Full=NADP-dependent alcohol dehydrogenase C 1; Short=Ms-ADHC 1
LE01Gene07165	0.544645	-0.876612	1.35288e-05	0.000112833	yes	down	RecName: Full=CDK5 regulatory subunit-associated protein 2; AltName: Full=CDK5 activator-binding protein C48; AltName: Full=Centrosome-associated protein 215
LE01Gene10172	2.37544	1.2482	1.3639e-05	0.000113585	yes	up	_
LE01Gene00158	0.419	-1.25498	1.36583e-05	0.000113662	yes	down	RecName: Full=Probable hexaprenyl pyrophosphate synthase, mitochondrial; Short=HPS; Flags: Precursor
LE01Gene02946	3.4101	1.76981	1.3715e-05	0.000114051	yes	up	RecName: Full=Pathogenesis-related protein 5; Short=PR-5; Flags: Precursor
LE01Gene02964	1.81671	0.861326	1.38174e-05	0.000114819	yes	up	_
LE01Gene01115	1.61477	0.691329	1.39177e-05	0.000115568	yes	up	_
LE01Gene05483	0.543176	-0.880509	1.4002e-05	0.000116183	yes	down	_
LE01Gene10963	0.640244	-0.643306	1.41401e-05	0.000117158	yes	down	_
LE01Gene06315	0.438886	-1.18808	1.41325e-05	0.000117158	yes	down	RecName: Full=Adenylate kinase; AltName: Full=ATP-AMP transphosphorylase; AltName: Full=ATP:AMP phosphotransferase; AltName: Full=Adenylate kinase cytosolic and mi
LE01Gene12498	1.68845	0.755697	1.42057e-05	0.000117554	yes	up	RecName: Full=Chromatin modification-related protein EAF1; AltName: Full=ESA1-associated factor 1; AltName: Full=Vacuolar import and degradation protein 21
LE01Gene03882	2.02866	1.02053	1.42086e-05	0.000117554	yes	up	RecName: Full=L-pipecolate oxidase; AltName: Full=L-pipecolic acid oxidase; Flags: Precursor
LE01Gene08865	0.649845	-0.621832	1.42813e-05	0.00011807	yes	down	RecName: Full=Cell division control protein 42 homolog; AltName: Full=CDC42Sp; Flags: Precursor
LE01Gene07011	3.40596	1.76806	1.4413e-05	0.000119072	yes	up	_
LE01Gene03425	5.15002	2.36458	1.44365e-05	0.00011918	yes	up	RecName: Full=Vacuolar fusion protein MON1
LE01Gene10670	0.129952	-2.94395	1.44581e-05	0.000119271	yes	down	_
LE01Gene03195	2.10191	1.0717	1.45404e-05	0.000119863	yes	up	RecName: Full=Diphthamide biosynthesis protein 7; AltName: Full=WD repeat-containing protein 85
LE01Gene01886	2.11322	1.07945	1.45887e-05	0.000120174	yes	up	RecName: Full=Glutamate--cysteine ligase catalytic subunit; AltName: Full=GCS heavy chain; AltName: Full=Gamma-ECS; AltName: Full=Gamma-glutamylcysteine synthetase
LE01Gene00135	2.22922	1.15654	1.47638e-05	0.000121441	yes	up	_
LE01Gene13000	0.615215	-0.700837	1.48312e-05	0.000121819	yes	down	RecName: Full=Cytosolic Fe-S cluster assembly factor CFD1; AltName: Full=Cytosolic Fe-S cluster-deficient protein 1
LE01Gene14437	0.646357	-0.629597	1.48278e-05	0.000121819	yes	down	RecName: Full=ADP-ribosylation factor-like protein 8B; AltName: Full=ADP-ribosylation factor-like protein 10C; AltName: Full=Novel small G protein indispensable fo
LE01Gene11806	0.641998	-0.639359	1.48802e-05	0.000122134	yes	down	RecName: Full=Tuftelin-interacting protein 11; AltName: Full=Septin and tuftelin-interacting protein 1; Short=STIP-1
LE01Gene04909	7.43248	2.89384	1.4926e-05	0.000122421	yes	up	_
LE01Gene05830	1.78196	0.833462	1.49656e-05	0.000122658	yes	up	RecName: Full=Alpha/beta hydrolase domain-containing protein 13; Short=Abhydrolase domain-containing protein 13
LE01Gene04434	0.349614	-1.51616	1.4979e-05	0.000122679	yes	down	_
LE01Gene11353	0.536113	-0.89939	1.50547e-05	0.000123211	yes	down	RecName: Full=NFX1-type zinc finger-containing protein 1
LE01Gene05138	0.551937	-0.857425	1.51332e-05	0.000123763	yes	down	_
LE01Gene06657	0.549724	-0.86322	1.52636e-05	0.00012474	yes	down	RecName: Full=Serine/threonine-protein kinase 16; AltName: Full=Embryo-derived protein kinase; Short=Edpk; AltName: Full=Myristoylated and palmitoylated serine/thr
LE01Gene11500	0.293498	-1.76858	1.52872e-05	0.000124844	yes	down	RecName: Full=40S ribosomal protein S12
LE01Gene01523	0.544923	-0.875877	1.54204e-05	0.000125841	yes	down	RecName: Full=Protein-S-isoprenylcysteine O-methyltransferase; AltName: Full=Isoprenylcysteine carboxylmethyltransferase; AltName: Full=Prenylated protein carboxyl
LE01Gene14219	4.26857	2.09375	1.54711e-05	0.000126165	yes	up	RecName: Full=Versicolorin reductase 1; Short=VER-1; AltName: Full=Aflatoxin biosynthesis protein M
LE01Gene13120	9.14754	3.19338	1.57132e-05	0.000128047	yes	up	_
LE01Gene09455	3.30867	1.72625	1.5777e-05	0.000128474	yes	up	_
LE01Gene08737	0.48305	-1.04976	1.58652e-05	0.000129008	yes	down	_
LE01Gene05777	0.414404	-1.27089	1.58649e-05	0.000129008	yes	down	_
LE01Gene05722	1.93018	0.948737	1.61143e-05	0.00013094	yes	up	RecName: Full=Bromodomain-containing protein DDB_G0271118
LE01Gene01541	0.500043	-0.999877	1.6186e-05	0.000131335	yes	down	RecName: Full=Uncharacterized J domain-containing protein C2E1P5.03; Flags: Precursor
LE01Gene05382	5.69827	2.51052	1.62484e-05	0.000131748	yes	up	_
LE01Gene13797	0.528337	-0.92047	1.64752e-05	0.000133491	yes	down	RecName: Full=RNA-binding protein 8A; AltName: Full=RNA-binding motif protein 8A; AltName: Full=Ribonucleoprotein RBM8A
LE01Gene09596	2.40046	1.26331	1.66332e-05	0.000134673	yes	up	_
LE01Gene02434	1.96855	0.977135	1.66447e-05	0.000134673	yes	up	RecName: Full=Nucleoside diphosphate kinase; Short=NDK; Short=NDP kinase
LE01Gene08895	0.636114	-0.652644	1.69592e-05	0.000136976	yes	down	RecName: Full=Pre-mRNA-splicing factor CEF1
LE01Gene09834	1.58802	0.667232	1.69654e-05	0.000136976	yes	up	_
LE01Gene13723	0.166388	-2.58738	1.70479e-05	0.000137544	yes	down	RecName: Full=Cytochrome P450 52A2; AltName: Full=Alkane-inducible P450-ALK2; AltName: Full=CYPLIIA2
LE01Gene05499	0.426967	-1.2278	1.70666e-05	0.000137597	yes	down	RecName: Full=54S ribosomal protein L12, mitochondrial; AltName: Full=Mitochondrial-nucleoid protein 1; Flags: Precursor
LE01Gene00741	0.457073	-1.1295	1.71126e-05	0.00013787	yes	down	RecName: Full=GrpE protein homolog, mitochondrial; Flags: Precursor
LE01Gene12442	1.81684	0.86143	1.72569e-05	0.000138935	yes	up	_
LE01Gene02023	2.14914	1.10376	1.72726e-05	0.000138963	yes	up	_
LE01Gene07705	0.644498	-0.633752	1.73783e-05	0.000139714	yes	down	_
LE01Gene14006	0.525654	-0.927814	1.7466e-05	0.00014032	yes	down	_
LE01Gene02798	0.391323	-1.35357	1.74932e-05	0.000140439	yes	down	_
LE01Gene04143	4.63376	2.21218	1.75175e-05	0.000140535	yes	up	_
LE01Gene07809	3.0533	1.61037	1.75911e-05	0.000141027	yes	up	RecName: Full=3-hydroxyacyl-CoA dehydrogenase type-2; AltName: Full=17-beta-hydroxysteroid dehydrogenase 10; Short=17-beta-HSD 10; AltName: Full=3-hydroxy-2-methylbu
LE01Gene04460	0.592423	-0.755302	1.76954e-05	0.000141763	yes	down	RecName: Full=N-alpha-acetyltransferase 20; AltName: Full=Methionine N-acetyltransferase; AltName: Full=N-acetyltransferase 5; AltName: Full=N-terminal acetyltrans
LE01Gene02592	1.50151	0.586412	1.77672e-05	0.000142137	yes	up	_
LE01Gene07287	1.81135	0.857064	1.78921e-05	0.000143036	yes	up	RecName: Full=Oleate activated transcription factor 3
LE01Gene03090	1.61942	0.695475	1.80278e-05	0.00014402	yes	up	RecName: Full=Uncharacterized protein YHR097C
LE01Gene14517	1.89296	0.920643	1.80784e-05	0.000144323	yes	up	_
LE01Gene13993	2.87199	1.52205	1.81425e-05	0.000144733	yes	up	_
LE01Gene07200	0.122126	-3.03356	1.82045e-05	0.000145024	yes	down	_
LE01Gene12314	1.55599	0.637835	1.83701e-05	0.000146199	yes	up	_
LE01Gene04973	2.81615	1.49372	1.83777e-05	0.000146199	yes	up	RecName: Full=Siderophore biosynthesis regulatory protein URBS1
LE01Gene09570	6.92771	2.79238	1.85297e-05	0.000147305	yes	up	_
LE01Gene08401	0.457584	-1.12789	1.86412e-05	0.000147985	yes	down	RecName: Full=Probable 37S ribosomal protein S5, mitochondrial
LE01Gene07267	0.273878	-1.86839	1.87276e-05	0.000148567	yes	down	_
LE01Gene02702	3.03974	1.60395	1.87971e-05	0.000149015	yes	up	_
LE01Gene01181	1.55833	0.639998	1.88727e-05	0.000149509	yes	up	RecName: Full=Epoxide hydrolase 1; AltName: Full=Epoxide hydratase; AltName: Full=Microsomal epoxide hydrolase
LE01Gene03921	1.80349	0.850788	1.88944e-05	0.000149578	yes	up	_
LE01Gene06968	1.8354	0.876098	1.91183e-05	0.000151139	yes	up	_
LE01Gene04140	0.534555	-0.903589	1.91146e-05	0.000151139	yes	down	RecName: Full=Probable transporter MCH4
LE01Gene00899	0.602482	-0.73101	1.92164e-05	0.00015181	yes	down	RecName: Full=Exodeoxyribonuclease
LE01Gene12181	0.531	-0.913215	1.94908e-05	0.00015387	yes	down	_
LE01Gene06185	0.503927	-0.988714	1.97357e-05	0.00015548	yes	down	_
LE01Gene09204	1.95088	0.964124	1.97808e-05	0.000155728	yes	up	_
LE01Gene07227	0.525882	-0.927189	2.0118e-05	0.000158273	yes	down	RecName: Full=Adenylate kinase isoenzyme 6 homolog; Short=AK6; AltName: Full=Dual activity adenylate kinase/ATPase; Short=AK/ATPase
LE01Gene00129	2.99198	1.5811	2.01476e-05	0.000158396	yes	up	_
LE01Gene11690	0.633115	-0.65946	2.03546e-05	0.000159913	yes	down	RecName: Full=Uncharacterized protein RSN1; AltName: Full=Rescuer of SRO7 at high Nacl protein 1
LE01Gene07248	0.471331	-1.08519	2.04778e-05	0.00016077	yes	down	RecName: Full=Small nuclear ribonucleoprotein Sm D2; Short=Sm-D2; AltName: Full=Complexed with cdc5 protein 9; AltName: Full=snRNP core protein D2
LE01Gene01711	21.0268	4.39416	2.07736e-05	0.00016298	yes	up	_
LE01Gene05339	1.63464	0.708975	2.08175e-05	0.000163212	yes	up	_
LE01Gene10370	0.527046	-0.924	2.08726e-05	0.00016353	yes	down	RecName: Full=Uncharacterized protein KIAA1211 homolog
LE01Gene01774	0.556561	-0.845389	2.10921e-05	0.000165023	yes	down	_
LE01Gene02958	2.15017	1.10445	2.11391e-05	0.000165277	yes	up	RecName: Full=Protein kinase C theta type; AltName: Full=nPKC-theta
LE01Gene07605	0.653395	-0.613972	2.14818e-05	0.000167841	yes	down	RecName: Full=Probable glucan 1,3-beta-glucosidase D; AltName: Full=Exo-1,3-beta-glucanase D
LE01Gene04685	2.32021	1.21426	2.17616e-05	0.000169911	yes	up	RecName: Full=Probable glucose transporter HXT5
LE01Gene09138	2.54285	1.34645	2.18863e-05	0.000170767	yes	up	_
LE01Gene06667	1.67796	0.746712	2.21653e-05	0.000172707	yes	up	_
LE01Gene10351	0.580968	-0.78347	2.22162e-05	0.000172985	yes	down	RecName: Full=NADH-ubiquinone oxidoreductase 49 kDa subunit, mitochondrial; AltName: Full=Complex I-49kD; Short=CI-49kD; Flags: Precursor
LE01Gene13682	2.72413	1.44579	2.22761e-05	0.000173333	yes	up	_
LE01Gene08828	0.651335	-0.618529	2.24397e-05	0.000174487	yes	down	RecName: Full=Vacuolar protein sorting-associated protein 1
LE01Gene04830	3.80674	1.92856	2.26739e-05	0.000176187	yes	up	_
LE01Gene03305	2.00558	1.00402	2.28457e-05	0.000177401	yes	up	RecName: Full=Hsp90 co-chaperone Cdc37; AltName: Full=Cell division control protein 37; AltName: Full=Hsp90 chaperone protein kinase-targeting subunit
LE01Gene02438	2.24918	1.1694	2.29102e-05	0.00017778	yes	up	RecName: Full=Alpha-xylosidase
LE01Gene13156	2.74401	1.45629	2.29841e-05	0.000178233	yes	up	RecName: Full=Delta(6)-protoilludene synthase; AltName: Full=6-protoilludene synthase
LE01Gene08135	2.5706	1.36211	2.30546e-05	0.000178658	yes	up	RecName: Full=Formate dehydrogenase 2, mitochondrial; AltName: Full=NAD-dependent formate dehydrogenase 2; Short=FDH 2; Flags: Precursor
LE01Gene11250	7.60625	2.92719	2.32917e-05	0.000180372	yes	up	_
LE01Gene10336	2.13729	1.09578	2.33172e-05	0.000180446	yes	up	_
LE01Gene05099	2.1711	1.11843	2.33657e-05	0.000180576	yes	up	_
LE01Gene05280	2.44708	1.29106	2.33522e-05	0.000180576	yes	up	_
LE01Gene04067	1.57152	0.652159	2.34412e-05	0.000180914	yes	up	_
LE01Gene02725	2.07164	1.05078	2.34344e-05	0.000180914	yes	up	RecName: Full=Transaldolase
LE01Gene06643	2.30802	1.20665	2.34624e-05	0.000180955	yes	up	_
LE01Gene07145	6.51445	2.70364	2.36968e-05	0.000182515	yes	up	_
LE01Gene07857	1.62251	0.69823	2.46271e-05	0.000189424	yes	up	_
LE01Gene00767	0.44642	-1.16353	2.46728e-05	0.000189647	yes	down	RecName: Full=Dolichol phosphate-mannose biosynthesis regulatory protein; AltName: Full=Dolichol-phosphate mannose synthase subunit 2; Short=DPM synthase subunit 2
LE01Gene06878	0.501407	-0.995947	2.49158e-05	0.000191385	yes	down	RecName: Full=Dolichol-phosphate mannosyltransferase; AltName: Full=Dolichol-phosphate mannose synthase; Short=DPM synthase; AltName: Full=Dolichyl-phosphate beta-D
LE01Gene05396	0.608824	-0.715903	2.49741e-05	0.000191704	yes	down	RecName: Full=Aspartate--tRNA(Asp/Asn) ligase; AltName: Full=Aspartyl-tRNA synthetase; Short=AspRS; AltName: Full=Non-discriminating aspartyl-tRNA synthetase; Shor
LE01Gene11875	2.33302	1.2222	2.50594e-05	0.000192229	yes	up	RecName: Full=Salicylate hydroxylase; AltName: Full=Salicylate 1-monooxygenase
LE01Gene03404	0.50185	-0.994671	2.52272e-05	0.000193386	yes	down	RecName: Full=Fumarate hydratase, mitochondrial; Short=Fumarase; Flags: Precursor
LE01Gene04060	2.09261	1.06531	2.53089e-05	0.000193882	yes	up	RecName: Full=D-arabinitol dehydrogenase 1; AltName: Full=NADP-dependent D-arabitol dehydrogenase
LE01Gene08345	2.46268	1.30023	2.5362e-05	0.000194027	yes	up	_
LE01Gene06482	3.03997	1.60406	2.53498e-05	0.000194027	yes	up	_
LE01Gene07797	22.9146	4.5182	2.58418e-05	0.000197564	yes	up	_
LE01Gene13243	5.12793	2.35838	2.59188e-05	0.00019802	yes	up	_
LE01Gene05815	1.77958	0.831537	2.61846e-05	0.000199917	yes	up	_
LE01Gene06357	0.458641	-1.12456	2.63771e-05	0.000201252	yes	down	RecName: Full=Ceramide very long chain fatty acid hydroxylase-like protein C19G12.08
LE01Gene04019	0.541243	-0.885651	2.64549e-05	0.000201503	yes	down	RecName: Full=Uncharacterized protein C4D7.04c
LE01Gene11699	0.431405	-1.21289	2.64552e-05	0.000201503	yes	down	_
LE01Gene02747	0.553563	-0.853182	2.64632e-05	0.000201503	yes	down	RecName: Full=Serine/threonine-protein phosphatase 2A activator; AltName: Full=PP2A, subunit B', PR53 isoform; AltName: Full=Phosphotyrosyl phosphatase activator; S
LE01Gene04474	0.626584	-0.674421	2.65019e-05	0.000201663	yes	down	RecName: Full=Probable sulfate permease C320.05
LE01Gene12213	0.426419	-1.22966	2.66351e-05	0.000202541	yes	down	RecName: Full=Alpha-amylase A type-1/2; AltName: Full=1,4-alpha-D-glucan glucanohydrolase; AltName: Full=Taka-amylase A; Short=TAA; Flags: Precursor
LE01Gene01037	1.73329	0.793511	2.66532e-05	0.000202543	yes	up	_
LE01Gene08875	0.561231	-0.833333	2.70801e-05	0.000205513	yes	down	_
LE01Gene04698	2.7159	1.44143	2.7078e-05	0.000205513	yes	up	_
LE01Gene13267	3.97145	1.98967	2.71427e-05	0.000205713	yes	up	RecName: Full=O-methylsterigmatocystin oxidoreductase; Short=OMST oxidoreductase; AltName: Full=Aflatoxin B synthase; AltName: Full=Aflatoxin biosynthesis protein
LE01Gene11401	2.83294	1.5023	2.71285e-05	0.000205713	yes	up	RecName: Full=Serine/threonine-protein kinase pakF
LE01Gene12695	1.90694	0.931261	2.72114e-05	0.000206097	yes	up	_
LE01Gene12391	1.69029	0.757274	2.72373e-05	0.000206155	yes	up	RecName: Full=Probable proline dehydrogenase 2; AltName: Full=Kidney and liver proline oxidase 1; AltName: Full=MmPOX1; AltName: Full=Probable proline oxidase 2; A
LE01Gene11482	0.428661	-1.22209	2.73043e-05	0.000206525	yes	down	RecName: Full=Mitochondrial import inner membrane translocase subunit TIM9 TIM9_CRYNJ RecName: Full=Mitochondrial import inner membrane tr
LE01Gene01343	0.550319	-0.861659	2.78181e-05	0.000210271	yes	down	RecName: Full=Pre-mRNA-splicing factor sap61; AltName: Full=Spliceosome-associated protein 61
LE01Gene12406	0.564518	-0.824908	2.79636e-05	0.000211231	yes	down	_
LE01Gene03058	1.64644	0.719353	2.80913e-05	0.000211914	yes	up	RecName: Full=Ribulose-phosphate 3-epimerase; AltName: Full=Ribulose-5-phosphate-3-epimerase
LE01Gene02539	1.77238	0.825684	2.83379e-05	0.000213633	yes	up	RecName: Full=Kynureninase; AltName: Full=Biosynthesis of nicotinic acid protein 5; AltName: Full=L-kynurenine hydrolase
LE01Gene05960	0.381559	-1.39002	2.83943e-05	0.000213917	yes	down	_
LE01Gene11100	2.29687	1.19967	2.85452e-05	0.000214911	yes	up	RecName: Full=Uncharacterized transporter C1002.16c
LE01Gene09298	0.0015366	-9.34604	2.87438e-05	0.000216263	yes	down	_
LE01Gene01027	21.2695	4.41072	2.88417e-05	0.000216856	yes	up	_
LE01Gene02493	0.544218	-0.877744	2.88661e-05	0.000216896	yes	down	_
LE01Gene12979	0.379814	-1.39663	2.90023e-05	0.000217776	yes	down	_
LE01Gene08281	1.50209	0.586968	2.91421e-05	0.00021825	yes	up	RecName: Full=Endoribonuclease Dicer; AltName: Full=Double-strand-specific ribonuclease mDCR-1
LE01Gene09339	1.54695	0.629429	2.91403e-05	0.00021825	yes	up	_
LE01Gene12904	0.312277	-1.6791	2.91119e-05	0.00021825	yes	down	RecName: Full=60S ribosomal protein L37a
LE01Gene07880	4.50277	2.17081	2.90851e-05	0.00021825	yes	up	RecName: Full=Protein NAM8
LE01Gene07284	0.541567	-0.884789	2.92085e-05	0.000218459	yes	down	RecName: Full=Ino eighty subunit 1
LE01Gene08208	0.599936	-0.737119	2.92086e-05	0.000218459	yes	down	RecName: Full=Pre-mRNA-splicing factor PRP46; AltName: Full=Pre-mRNA-processing protein 46
LE01Gene05092	0.545184	-0.875184	2.93169e-05	0.000219099	yes	down	_
LE01Gene01549	0.519319	-0.945306	2.93327e-05	0.000219099	yes	down	RecName: Full=Isocitrate dehydrogenase
LE01Gene04317	1.97014	0.978299	2.9428e-05	0.000219612	yes	up	_
LE01Gene03156	0.63277	-0.660247	2.94593e-05	0.000219612	yes	down	RecName: Full=Ribose-phosphate pyrophosphokinase 2; AltName: Full=Phosphoribosyl pyrophosphate synthase 2
LE01Gene04720	2.34881	1.23193	2.96265e-05	0.000220714	yes	up	RecName: Full=Enolase; AltName: Full=2-phospho-D-glycerate hydro-lyase; AltName: Full=2-phosphoglycerate dehydratase
LE01Gene03046	0.611568	-0.709414	2.98748e-05	0.000222418	yes	down	_
LE01Gene11306	0.486265	-1.04018	3.01774e-05	0.000224378	yes	down	_
LE01Gene05502	0.619478	-0.690876	3.02232e-05	0.000224572	yes	down	RecName: Full=Probable NADH dehydrogenase
LE01Gene01034	0.617085	-0.696459	3.04518e-05	0.000226122	yes	down	_
LE01Gene07733	2.02063	1.0148	3.05619e-05	0.000226792	yes	up	_
LE01Gene06861	2.87624	1.52419	3.07245e-05	0.00022785	yes	up	_
LE01Gene12694	1.61131	0.688237	3.07759e-05	0.000228082	yes	up	_
LE01Gene13783	0.211779	-2.23937	3.08895e-05	0.000228539	yes	down	RecName: Full=Histone H4 H4_AGABI RecName: Full=Histone H4
LE01Gene07623	1.73361	0.793775	3.09178e-05	0.000228539	yes	up	_
LE01Gene00091	0.482545	-1.05126	3.09107e-05	0.000228539	yes	down	_
LE01Gene05476	0.661611	-0.595945	3.08999e-05	0.000228539	yes	down	_
LE01Gene06952	3.80253	1.92696	3.10464e-05	0.000229242	yes	up	_
LE01Gene02909	1.97774	0.983856	3.14245e-05	0.000231832	yes	up	_
LE01Gene05610	0.480591	-1.05712	3.15743e-05	0.000232787	yes	down	RecName: Full=Translation initiation factor IF-2, mitochondrial; Short=IF-2(Mt); Short=IF-2Mt; Short=IF2(mt); Flags: Precursor
LE01Gene10022	2.1059	1.07444	3.16924e-05	0.000233506	yes	up	_
LE01Gene07139	1.70099	0.766372	3.20647e-05	0.000235943	yes	up	RecName: Full=Probable serine/threonine-protein kinase kinX
LE01Gene04333	1.70963	0.773683	3.21895e-05	0.000236708	yes	up	_
LE01Gene04068	0.418763	-1.25579	3.24135e-05	0.000238201	yes	down	RecName: Full=Serine hydroxymethyltransferase 3, chloroplastic; Short=AtSHMT3; AltName: Full=Glycine hydroxymethyltransferase 3; AltName: Full=Serine methylase 3;
LE01Gene00953	0.434837	-1.20145	3.26475e-05	0.000239766	yes	down	RecName: Full=Putative enoyl reductase C646.07c
LE01Gene04160	0.481879	-1.05326	3.26936e-05	0.00023995	yes	down	RecName: Full=ER lumen protein-retaining receptor
LE01Gene00832	1.63875	0.712592	3.29366e-05	0.000241577	yes	up	RecName: Full=Autophagy-related protein 2
LE01Gene03200	2.69439	1.42996	3.36221e-05	0.000246434	yes	up	_
LE01Gene11791	0.619378	-0.691109	3.36421e-05	0.000246434	yes	down	_
LE01Gene07221	1.50688	0.59156	3.37084e-05	0.000246761	yes	up	_
LE01Gene10433	0.60146	-0.733459	3.39499e-05	0.00024821	yes	down	_
LE01Gene10273	0.456501	-1.13131	3.39484e-05	0.00024821	yes	down	RecName: Full=O-methylsterigmatocystin oxidoreductase; Short=OMST oxidoreductase; AltName: Full=Aflatoxin B synthase; AltName: Full=Aflatoxin biosynthesis protein
LE01Gene00630	0.629014	-0.668837	3.42882e-05	0.000250361	yes	down	RecName: Full=Nuclear cap-binding protein subunit 2; AltName: Full=20 kDa nuclear cap-binding protein; AltName: Full=NCBP 20 kDa subunit; Short=CBP20
LE01Gene10027	0.654253	-0.612081	3.43755e-05	0.000250837	yes	down	_
LE01Gene09148	2.35453	1.23544	3.4581e-05	0.000252014	yes	up	RecName: Full=Aldo-keto reductase yakc
LE01Gene04175	0.438502	-1.18935	3.46763e-05	0.000252546	yes	down	_
LE01Gene05111	1.71655	0.779513	3.48494e-05	0.000253644	yes	up	_
LE01Gene08617	0.584271	-0.775291	3.49651e-05	0.000254324	yes	down	_
LE01Gene03560	0.00138963	-9.49108	3.51504e-05	0.000255509	yes	down	_
LE01Gene06448	0.530022	-0.915877	3.51932e-05	0.000255656	yes	down	RecName: Full=DNA-directed RNA polymerase, mitochondrial; Flags: Precursor
LE01Gene05588	1.95238	0.965236	3.55134e-05	0.000257818	yes	up	RecName: Full=Tripeptidyl-peptidase sed3; AltName: Full=Sedolisin-C; Flags: Precursor
LE01Gene11043	3.49164	1.8039	3.6011e-05	0.000261263	yes	up	RecName: Full=N-ethylmaleimide reductase; AltName: Full=N-ethylmaleimide reducing enzyme
LE01Gene08815	0.397424	-1.33125	3.6177e-05	0.000262301	yes	down	_
LE01Gene01583	0.552561	-0.855795	3.63171e-05	0.000263149	yes	down	RecName: Full=U3 small nucleolar RNA-associated protein 15 homolog
LE01Gene11294	3.89561	1.96185	3.64112e-05	0.000263662	yes	up	_
LE01Gene10104	3.32813	1.73471	3.66188e-05	0.000264828	yes	up	RecName: Full=Zinc-type alcohol dehydrogenase-like protein PB24D3.08c
LE01Gene02279	3.20211	1.67902	3.65957e-05	0.000264828	yes	up	_
LE01Gene11080	33.1038	5.04892	3.70062e-05	0.00026746	yes	up	_
LE01Gene12481	0.46882	-1.09289	3.72415e-05	0.000268819	yes	down	_
LE01Gene12297	15.1719	3.92333	3.72727e-05	0.000268874	yes	up	_
LE01Gene02995	4.31832	2.11047	3.74025e-05	0.00026964	yes	up	_
LE01Gene05845	1.63292	0.707451	3.7693e-05	0.000271412	yes	up	RecName: Full=Zinc finger protein sfp1
LE01Gene03550	0.376533	-1.40915	3.76962e-05	0.000271412	yes	down	RecName: Full=60S ribosomal protein L30-1; AltName: Full=L32
LE01Gene07569	1.68821	0.755495	3.77641e-05	0.000271729	yes	up	_
LE01Gene03381	0.492288	-1.02242	3.79577e-05	0.00027295	yes	down	RecName: Full=Prohibitin-2
LE01Gene09112	1.78188	0.833399	3.80785e-05	0.000273645	yes	up	RecName: Full=Putative nicotinamide N-methyltransferase
LE01Gene04635	1.63	0.704874	3.82532e-05	0.000274728	yes	up	_
LE01Gene01929	2.31558	1.21137	3.86653e-05	0.000277512	yes	up	_
LE01Gene04599	14.28	3.83593	3.87275e-05	0.000277783	yes	up	RecName: Full=High-affinity zinc uptake system protein ZnuA; Flags: Precursor
LE01Gene07671	1.92576	0.945429	3.87684e-05	0.000277901	yes	up	RecName: Full=Protein IMPACT; AltName: Full=Imprinted and ancient gene protein homolog IMPTB_XENTR RecName: Full=Protein IMPACT-B; AltName
LE01Gene00087	0.45904	-1.12331	3.88392e-05	0.000278234	yes	down	RecName: Full=ATP-dependent RNA helicase eIF4A; AltName: Full=Eukaryotic initiation factor 4A; Short=eIF-4A; AltName: Full=Translation initiation factor 1
LE01Gene14306	2.99928	1.58462	3.89897e-05	0.00027896	yes	up	RecName: Full=Uncharacterized MscS family protein C1183.11
LE01Gene11101	1.92759	0.946802	3.89749e-05	0.00027896	yes	up	_
LE01Gene04744	2.01543	1.01109	3.92311e-05	0.000280335	yes	up	_
LE01Gene00290	1.90786	0.931956	3.93727e-05	0.00028117	yes	up	RecName: Full=Riboflavin synthase; Short=RS
LE01Gene10827	0.595305	-0.748298	3.98882e-05	0.000284672	yes	down	RecName: Full=tRNA ligase 1
LE01Gene01544	0.659994	-0.599475	4.03077e-05	0.000287486	yes	down	_
LE01Gene12122	2.17954	1.12402	4.03793e-05	0.000287636	yes	up	_
LE01Gene03503	0.499124	-1.00253	4.03629e-05	0.000287636	yes	down	RecName: Full=Asparagine--tRNA ligase; AltName: Full=Asparaginyl-tRNA synthetase; Short=AsnRS
LE01Gene07697	0.530453	-0.914704	4.06141e-05	0.000288766	yes	down	RecName: Full=Mitochondrial import receptor subunit tom20; AltName: Full=Mitochondrial 20 kDa outer membrane protein; AltName: Full=Protein mom19; AltName: Full=Tran
LE01Gene04235	0.380095	-1.39557	4.0673e-05	0.000289005	yes	down	RecName: Full=Cyclopropane-fatty-acyl-phospholipid synthase; Short=CFA synthase; Short=Cyclopropane fatty acid synthase
LE01Gene11931	0.512307	-0.964919	4.08975e-05	0.000290418	yes	down	_
LE01Gene11700	0.566303	-0.820353	4.12831e-05	0.000292973	yes	down	RecName: Full=Ubiquinone biosynthesis protein COQ4, mitochondrial; AltName: Full=Coenzyme Q biosynthesis protein 4; Flags: Precursor
LE01Gene00237	0.306486	-1.70611	4.13767e-05	0.000293379	yes	down	RecName: Full=60S acidic ribosomal protein P1; AltName: Full=Allergen Cla h XII; AltName: Allergen=Cla h 12
LE01Gene07788	0.626097	-0.675542	4.13919e-05	0.000293379	yes	down	_
LE01Gene00911	0.529661	-0.91686	4.15346e-05	0.000294207	yes	down	_
LE01Gene02875	0.637726	-0.648992	4.17488e-05	0.000295541	yes	down	RecName: Full=Serine palmitoyltransferase 2; Short=SPT 2; AltName: Full=Long chain base biosynthesis protein 2
LE01Gene02641	1.69117	0.758018	4.1849e-05	0.000296066	yes	up	_
LE01Gene00260	1.97696	0.983286	4.21898e-05	0.000298292	yes	up	RecName: Full=Sequestosome-1; AltName: Full=EBI3-associated protein of 60 kDa; Short=EBIAP; Short=p60; AltName: Full=Phosphotyrosine-independent ligand for the Lck
LE01Gene05512	0.461369	-1.11601	4.28186e-05	0.000302361	yes	down	_
LE01Gene01920	0.589421	-0.762629	4.29568e-05	0.000303149	yes	down	RecName: Full=Zinc finger protein C25B8.19c
LE01Gene06330	1.55513	0.637039	4.3046e-05	0.00030359	yes	up	RecName: Full=Ribose-phosphate pyrophosphokinase 2; AltName: Full=Phosphoribosyl pyrophosphate synthase 2
LE01Gene13065	2.25161	1.17096	4.32001e-05	0.000304488	yes	up	RecName: Full=Hexose transporter HXT10
LE01Gene11333	0.0145952	-6.09836	4.35446e-05	0.000306727	yes	down	_
LE01Gene05189	6.55255	2.71206	4.39194e-05	0.000309175	yes	up	_
LE01Gene09075	3.10366	1.63397	4.41079e-05	0.00031031	yes	up	_
LE01Gene09119	1.58788	0.667098	4.42214e-05	0.000310917	yes	up	_
LE01Gene05181	1.55991	0.641463	4.4555e-05	0.000312875	yes	up	RecName: Full=Alanine/arginine aminopeptidase
LE01Gene10850	2.53256	1.3406	4.47918e-05	0.000313956	yes	up	_
LE01Gene14239	0.515902	-0.954831	4.47788e-05	0.000313956	yes	down	RecName: Full=Protein SLG1; AltName: Full=Cell wall integrity and stress response component 1; AltName: Full=Synthetic lethal with GAP protein 1; Flags: Precursor
LE01Gene02264	3.65128	1.8684	4.48361e-05	0.000314074	yes	up	RecName: Full=N-acetylgalactosamine kinase; AltName: Full=GalNAc kinase; AltName: Full=Galactokinase 2
LE01Gene03906	2.14771	1.1028	4.49063e-05	0.000314178	yes	up	_
LE01Gene13511	1.66892	0.738912	4.52896e-05	0.000316665	yes	up	RecName: Full=E3 ubiquitin-protein ligase listerin; AltName: Full=RING domain mutant killed by rtf1 deletion protein 1
LE01Gene00323	0.585841	-0.771418	4.53713e-05	0.000317042	yes	down	RecName: Full=Nucleoporin pom152
LE01Gene00168	1.50746	0.592117	4.54694e-05	0.000317532	yes	up	_
LE01Gene01671	1.74755	0.805336	4.55598e-05	0.000317969	yes	up	_
LE01Gene03508	0.614336	-0.702901	4.56519e-05	0.000318416	yes	down	RecName: Full=GTP-binding protein Rho3; Flags: Precursor
LE01Gene04445	1.65241	0.724575	4.57462e-05	0.000318878	yes	up	_
LE01Gene08621	1.80237	0.849895	4.5796e-05	0.00031903	yes	up	_
LE01Gene07694	0.558741	-0.839749	4.60389e-05	0.000320526	yes	down	RecName: Full=NADH dehydrogenase
LE01Gene06557	5.14129	2.36213	4.61803e-05	0.000321314	yes	up	_
LE01Gene08927	0.454939	-1.13625	4.6701e-05	0.000324738	yes	down	RecName: Full=26S protease regulatory subunit 7; AltName: Full=26S proteasome AAA-ATPase subunit RPT1; AltName: Full=Proteasome 26S subunit ATPase 2
LE01Gene07444	1.86615	0.900065	4.69565e-05	0.000325534	yes	up	_
LE01Gene07902	3.9131	1.96831	4.69378e-05	0.000325534	yes	up	_
LE01Gene05520	0.33996	-1.55657	4.68727e-05	0.000325534	yes	down	RecName: Full=PARP-type zinc finger-containing protein C2A9.07c
LE01Gene02484	0.629717	-0.667225	4.68874e-05	0.000325534	yes	down	_
LE01Gene12320	1.88358	0.913475	4.69586e-05	0.000325534	yes	up	_
LE01Gene14345	1.86483	0.899045	4.70098e-05	0.00032569	yes	up	_
LE01Gene13890	0.27813	-1.84617	4.72171e-05	0.000326927	yes	down	RecName: Full=60S ribosomal protein L29; AltName: Full=L43
LE01Gene05295	0.481875	-1.05327	4.73267e-05	0.000327487	yes	down	RecName: Full=Splicing factor U2AF 65 kDa subunit; AltName: Full=U2 auxiliary factor 65 kDa subunit; AltName: Full=U2 snRNP auxiliary factor large subunit
LE01Gene00178	2.46975	1.30437	4.77223e-05	0.000330024	yes	up	_
LE01Gene04031	0.541614	-0.884663	4.79422e-05	0.000331343	yes	down	RecName: Full=Putative serine/threonine-protein phosphatase C22H10.04
LE01Gene00043	0.549203	-0.864587	4.80865e-05	0.000332139	yes	down	RecName: Full=Chitobiosyldiphosphodolichol beta-mannosyltransferase; AltName: Full=Asparagine-linked glycosylation protein 1 homolog; AltName: Full=Beta-1,4-mannos
LE01Gene02295	2.81878	1.49507	4.82141e-05	0.000332818	yes	up	RecName: Full=Meiosis protein mei2
LE01Gene04745	0.66619	-0.585994	4.85646e-05	0.000335034	yes	down	RecName: Full=Pheromone-processing carboxypeptidase KEX1; AltName: Full=Carboxypeptidase D; Flags: Precursor
LE01Gene05993	0.560261	-0.835828	4.87e-05	0.000335764	yes	down	RecName: Full=Growth regulation protein
LE01Gene04532	1.62361	0.699204	4.88303e-05	0.000336459	yes	up	_
LE01Gene11050	6.67044	2.73778	4.88829e-05	0.000336617	yes	up	_
LE01Gene05983	2.95024	1.56083	4.89249e-05	0.000336703	yes	up	RecName: Full=Adenosine kinase
LE01Gene04325	0.438561	-1.18915	4.90087e-05	0.000337076	yes	down	RecName: Full=Molybdenum cofactor sulfurase; Short=MCS; Short=MOS; Short=MoCo sulfurase; AltName: Full=Abscisic acid protein 3; AltName: Full=Low expression of osm
LE01Gene00376	2.46984	1.30442	4.91763e-05	0.000338024	yes	up	_
LE01Gene04998	2.34063	1.2269	4.92656e-05	0.000338433	yes	up	_
LE01Gene13908	2.15553	1.10804	4.95308e-05	0.000340049	yes	up	RecName: Full=Uncharacterized lactate 2-monooxygenase PB1A11.03
LE01Gene02889	0.0114375	-6.45008	4.96239e-05	0.000340483	yes	down	_
LE01Gene01152	0.643933	-0.635018	4.96843e-05	0.00034062	yes	down	RecName: Full=Vacuolar protein sorting/targeting protein 10; AltName: Full=Carboxypeptidase Y receptor; Short=CPY receptor; AltName: Full=Sortilin VPS10; AltName:
LE01Gene03872	59.7011	5.89969	4.97036e-05	0.00034062	yes	up	_
LE01Gene04740	2.79866	1.48474	4.97806e-05	0.000340942	yes	up	RecName: Full=Putative dioxygenase C576.01c
LE01Gene03436	0.494164	-1.01694	4.99239e-05	0.00034131	yes	down	_
LE01Gene03325	1.53922	0.622198	4.99244e-05	0.00034131	yes	up	_
LE01Gene07436	2.59841	1.37763	4.99217e-05	0.00034131	yes	up	_
LE01Gene12206	2.52668	1.33724	5.02581e-05	0.000343179	yes	up	_
LE01Gene03976	0.462069	-1.11382	5.09356e-05	0.000347441	yes	down	_
LE01Gene12017	0.196651	-2.34629	5.09434e-05	0.000347441	yes	down	RecName: Full=Activin receptor type-1; AltName: Full=Activin receptor type I; Short=ACTR-I; AltName: Full=Activin receptor-like kinase 2; Short=ALK-2; AltName: Full=
LE01Gene03414	0.641859	-0.639671	5.11492e-05	0.000348636	yes	down	_
LE01Gene04253	0.459234	-1.1227	5.27079e-05	0.000359045	yes	down	RecName: Full=30S ribosomal protein S4
LE01Gene07949	1.74569	0.803796	5.28561e-05	0.000359839	yes	up	RecName: Full=General amino acid permease AGP2
LE01Gene12083	2.41948	1.2747	5.30976e-05	0.000361267	yes	up	RecName: Full=Leukotriene A-4 hydrolase homolog; Short=LTA-4 hydrolase; AltName: Full=Leukotriene A(4) hydrolase
LE01Gene11375	3.12167	1.64232	5.3556e-05	0.000364168	yes	up	_
LE01Gene08633	1.56063	0.64213	5.36697e-05	0.000364723	yes	up	_
LE01Gene07803	1.78453	0.835541	5.45222e-05	0.000369853	yes	up	RecName: Full=Sexual differentiation process protein isp4
LE01Gene00431	0.476567	-1.06925	5.50435e-05	0.000373168	yes	down	RecName: Full=Serine--tRNA ligase, mitochondrial; AltName: Full=Seryl-tRNA synthetase; Short=SerRS; AltName: Full=Seryl-tRNA(Ser/Sec) synthetase; Flags: Precursor
LE01Gene13570	0.326006	-1.61703	5.53118e-05	0.000374763	yes	down	_
LE01Gene11210	0.584234	-0.775382	5.59403e-05	0.000378796	yes	down	_
LE01Gene00877	4.03863	2.01386	5.6009e-05	0.00037881	yes	up	_
LE01Gene09650	0.515731	-0.955309	5.6001e-05	0.00037881	yes	down	RecName: Full=Maintenance of ploidy protein mob2
LE01Gene01466	2.09901	1.06971	5.60534e-05	0.000378885	yes	up	RecName: Full=Serine/threonine-protein kinase cek1
LE01Gene07978	0.382751	-1.38552	5.6208e-05	0.000379479	yes	down	_
LE01Gene11338	2.78046	1.47533	5.61943e-05	0.000379479	yes	up	_
LE01Gene11538	1.77178	0.825203	5.69583e-05	0.000383861	yes	up	RecName: Full=Zinc finger protein 202; AltName: Full=Zinc finger protein with KRAB and SCAN domains 10
LE01Gene05398	0.489598	-1.03033	5.70755e-05	0.000384423	yes	down	RecName: Full=Polyadenylate-binding protein 2; Short=PABP-2; Short=Poly(A)-binding protein 2; AltName: Full=Poly(A)-binding protein II; Short=PABII
LE01Gene02359	0.585236	-0.77291	5.7195e-05	0.000385	yes	down	_
LE01Gene03337	2.11657	1.08173	5.728e-05	0.000385344	yes	up	RecName: Full=Mitochondrial translocator assembly and maintenance protein 41 homolog; Short=TAM41; AltName: Full=MMP37-like protein, mitochondrial; Flags: Precurso
LE01Gene04654	3.15594	1.65807	5.73767e-05	0.000385596	yes	up	_
LE01Gene02873	2.3229	1.21593	5.73975e-05	0.000385596	yes	up	RecName: Full=Protein OPI10 homolog
LE01Gene14637	0.438572	-1.18911	5.75371e-05	0.00038616	yes	down	_
LE01Gene09723	0.41591	-1.26566	5.79806e-05	0.000388678	yes	down	_
LE01Gene05458	0.606585	-0.721217	5.87244e-05	0.00039297	yes	down	RecName: Full=5'-3' exoribonuclease 2
LE01Gene10755	0.542072	-0.883443	5.89678e-05	0.000394367	yes	down	_
LE01Gene05147	0.605875	-0.722908	5.91604e-05	0.000395422	yes	down	_
LE01Gene04902	2.17231	1.11923	5.9427e-05	0.000396971	yes	up	RecName: Full=Fructose-bisphosphate aldolase; Short=FBP aldolase; Short=FBPA; AltName: Full=Fructose-1,6-bisphosphate aldolase
LE01Gene00747	0.292798	-1.77202	5.95886e-05	0.000397817	yes	down	RecName: Full=Mitochondrial import receptor subunit TOM40; AltName: Full=Mitochondrial import site protein ISP42; AltName: Full=Translocase of outer membrane 40 kDa
LE01Gene07026	0.47459	-1.07525	5.98888e-05	0.000399586	yes	down	RecName: Full=54S ribosomal protein L23, mitochondrial; Flags: Precursor
LE01Gene05228	1.79251	0.841984	6.01207e-05	0.000400676	yes	up	RecName: Full=Pyruvate carboxylase; AltName: Full=Pyruvic carboxylase; Short=PCB
LE01Gene00740	0.414402	-1.2709	6.01226e-05	0.000400676	yes	down	RecName: Full=C-1-tetrahydrofolate synthase, cytoplasmic; Short=C1-THF synthase; Includes: RecName: Full=Methylenetetrahydrofolate dehydrogenase; Includes: RecName:
LE01Gene03347	0.460759	-1.11791	6.02438e-05	0.000401015	yes	down	RecName: Full=Putative dihydroxy-acid dehydratase, mitochondrial; Short=DAD; AltName: Full=2,3-dihydroxy acid hydrolyase; Flags: Precursor
LE01Gene01447	22.4598	4.48927	6.02207e-05	0.000401015	yes	up	_
LE01Gene03428	0.328019	-1.60815	6.03498e-05	0.000401485	yes	down	RecName: Full=40S ribosomal protein S28; AltName: Full=S33
LE01Gene04684	2.44991	1.29273	6.12551e-05	0.000407269	yes	up	RecName: Full=Uncharacterized mitochondrial protein AtMg00860; AltName: Full=ORF158 (mitochondrion)
LE01Gene01346	3.02506	1.59697	6.15778e-05	0.000409176	yes	up	_
LE01Gene05298	0.489993	-1.02917	6.18918e-05	0.000411022	yes	down	_
LE01Gene10067	0.527143	-0.923733	6.24224e-05	0.000414304	yes	down	_
LE01Gene06996	2.01699	1.0122	6.3369e-05	0.000420341	yes	up	_
LE01Gene10983	2.41669	1.27303	6.34427e-05	0.000420585	yes	up	_
LE01Gene02331	2.34882	1.23193	6.38148e-05	0.000422314	yes	up	_
LE01Gene12076	0.215641	-2.2133	6.37605e-05	0.000422314	yes	down	_
LE01Gene00461	0.590553	-0.759862	6.37805e-05	0.000422314	yes	down	RecName: Full=37S ribosomal protein S25, mitochondrial
LE01Gene10783	1.81619	0.860918	6.40941e-05	0.000423916	yes	up	RecName: Full=Eukaryotic translation initiation factor 4E-4; Short=eIF-4E-4; Short=eIF4E-4; AltName: Full=eIF-4F 25 kDa subunit; AltName: Full=mRNA cap-binding prot
LE01Gene09499	5.98872	2.58225	6.50872e-05	0.000429236	yes	up	_
LE01Gene02158	0.34958	-1.5163	6.50866e-05	0.000429236	yes	down	RecName: Full=Minor histocompatibility antigen H13; AltName: Full=Intramembrane protease 1; Short=IMP-1; Short=IMPAS-1; Short=hIMP1; AltName: Full=Presenilin-like p
LE01Gene09891	0.485787	-1.0416	6.52226e-05	0.00042988	yes	down	RecName: Full=Protein transport protein SEC61 subunit alpha
LE01Gene12015	0.614536	-0.70243	6.53955e-05	0.00043077	yes	down	_
LE01Gene13140	5.41093	2.43588	6.56627e-05	0.00043228	yes	up	_
LE01Gene11426	13.0107	3.70163	6.57059e-05	0.000432314	yes	up	_
LE01Gene03564	6.77433	2.76008	6.60883e-05	0.000434578	yes	up	RecName: Full=Probable tartrate dehydrogenase/decarboxylase TtuC'; Short=TDH; AltName: Full=D-malate dehydrogenase
LE01Gene12830	1.51187	0.596336	6.61276e-05	0.000434586	yes	up	RecName: Full=Translation initiation factor eIF-2B subunit beta; AltName: Full=eIF-2B GDP-GTP exchange factor subunit beta
LE01Gene07961	3.29924	1.72213	6.69868e-05	0.000439935	yes	up	RecName: Full=Exoglucanase 1; AltName: Full=1,4-beta-cellobiohydrolase; AltName: Full=Exocellobiohydrolase I; AltName: Full=Exoglucanase I; Flags: Precursor
LE01Gene00425	0.622997	-0.682703	6.70189e-05	0.000439935	yes	down	RecName: Full=Lipase; AltName: Full=Triacylglycerol lipase; Contains: RecName: Full=Lipase 86 kDa form; Contains: RecName: Full=Lipase 46 kDa form; Flags: Precursor
LE01Gene03071	0.562647	-0.829697	6.77558e-05	0.000444003	yes	down	RecName: Full=Glucose-induced degradation protein 8 homolog
LE01Gene06889	1.6632	0.733961	6.78005e-05	0.000444041	yes	up	RecName: Full=Mitosis inhibitor nif1; AltName: Full=Nim1-interacting factor 1
LE01Gene06967	2.08148	1.05761	6.82456e-05	0.000446698	yes	up	_
LE01Gene01536	0.543003	-0.880969	6.83865e-05	0.000447363	yes	down	RecName: Full=Sphingosine N-acyltransferase lac1; AltName: Full=Meiotically up-regulated gene 83 protein
LE01Gene00642	2.40786	1.26775	6.87196e-05	0.000449284	yes	up	_
LE01Gene11838	0.49364	-1.01847	6.88539e-05	0.000449903	yes	down	RecName: Full=Nucleolar protein 6; AltName: Full=Maternal transcript 89Ba
LE01Gene13293	2.197	1.13553	6.9081e-05	0.000451128	yes	up	_
LE01Gene05281	1.75604	0.812325	6.93841e-05	0.000452848	yes	up	_
LE01Gene05584	1.82639	0.868993	6.95289e-05	0.000453533	yes	up	RecName: Full=Protein argonaute-3; Short=Argonaute3; AltName: Full=Argonaute RISC catalytic component 3; AltName: Full=Eukaryotic translation initiation factor 2C
LE01Gene00952	0.619234	-0.691444	6.97419e-05	0.000454661	yes	down	_
LE01Gene12203	8.89664	3.15326	6.99468e-05	0.000455475	yes	up	RecName: Full=Alpha-amylase 1; AltName: Full=1,4-alpha-D-glucan glucanohydrolase 1; Flags: Precursor
LE01Gene05822	2.05331	1.03795	7.02643e-05	0.000457019	yes	up	_
LE01Gene01942	0.622445	-0.683981	7.03449e-05	0.000457268	yes	down	RecName: Full=Uncharacterized transcriptional regulatory protein C530.08
LE01Gene00662	0.552762	-0.855269	7.03829e-05	0.000457268	yes	down	RecName: Full=Probable peptide chain release factor C12orf65 homolog, mitochondrial; Flags: Precursor
LE01Gene00650	2.09068	1.06397	7.10188e-05	0.000461006	yes	up	RecName: Full=Ubiquitin-conjugating enzyme E2-16 kDa; AltName: Full=Ubiquitin carrier protein; AltName: Full=Ubiquitin-protein ligase
LE01Gene13398	2.37148	1.24578	7.10394e-05	0.000461006	yes	up	_
LE01Gene04522	0.494572	-1.01575	7.1163e-05	0.000461545	yes	down	_
LE01Gene09778	0.515559	-0.95579	7.13595e-05	0.000462556	yes	down	_
LE01Gene12180	13.3853	3.74258	7.14914e-05	0.000463147	yes	up	_
LE01Gene02243	0.59125	-0.75816	7.17427e-05	0.00046451	yes	down	RecName: Full=Putative phosphatidate cytidylyltransferase; AltName: Full=CDP-DAG synthase; AltName: Full=CDP-DG synthase; AltName: Full=CDP-diacylglycerol synthase;
LE01Gene04805	0.640128	-0.643569	7.1879e-05	0.000465129	yes	down	RecName: Full=Protein transport protein SEC13
LE01Gene12896	0.491833	-1.02376	7.21131e-05	0.000466378	yes	down	RecName: Full=Translocation protein sec63
LE01Gene09000	0.397851	-1.3297	7.26061e-05	0.000469033	yes	down	_
LE01Gene11322	1.62317	0.698817	7.26969e-05	0.000469353	yes	up	_
LE01Gene11335	2.16142	1.11198	7.29645e-05	0.000470813	yes	up	RecName: Full=Uncharacterized MFS-type transporter PB1E7.08c
LE01Gene10342	0.43796	-1.19113	7.30522e-05	0.000471112	yes	down	RecName: Full=U1 small nuclear ribonucleoprotein 70 kDa homolog; Short=U1 70K; Short=U1 snRNP 70 kDa homolog; Short=U1-70K; AltName: Full=U1 small nuclear ribonucle
LE01Gene00589	2.14865	1.10343	7.3544e-05	0.000474015	yes	up	_
LE01Gene02239	0.602396	-0.731217	7.45918e-05	0.000480496	yes	down	RecName: Full=Queuine tRNA-ribosyltransferase; AltName: Full=Guanine insertion enzyme; AltName: Full=tRNA-guanine transglycosylase
LE01Gene10268	3.28798	1.7172	7.4941e-05	0.000482473	yes	up	_
LE01Gene03454	0.479562	-1.06021	7.50684e-05	0.000482746	yes	down	RecName: Full=50S ribosomal protein L17
LE01Gene02816	1.77884	0.830934	7.53509e-05	0.000484289	yes	up	RecName: Full=Delta(12) fatty acid dehydrogenase; AltName: Full=Crepenynate synthase; AltName: Full=Delta-12 fatty acid acetylenase
LE01Gene00044	0.521195	-0.940106	7.56129e-05	0.000485698	yes	down	RecName: Full=O-methylsterigmatocystin oxidoreductase; Short=OMST oxidoreductase; AltName: Full=Aflatoxin B synthase; AltName: Full=Aflatoxin biosynthesis protein
LE01Gene14371	0.426434	-1.22961	7.58408e-05	0.000486888	yes	down	_
LE01Gene12918	0.654176	-0.61225	7.60447e-05	0.000487921	yes	down	_
LE01Gene01313	2.08706	1.06147	7.70848e-05	0.000494316	yes	up	_
LE01Gene01444	0.51789	-0.949283	7.81947e-05	0.000501151	yes	down	RecName: Full=Probable U6 snRNA-associated Sm-like protein LSm3
LE01Gene06600	2.81015	1.49065	7.89434e-05	0.00050538	yes	up	_
LE01Gene11769	0.627165	-0.673084	7.90952e-05	0.000506067	yes	down	RecName: Full=Sporulation protein RMD1; AltName: Full=Required for meiotic nuclear division protein 1
LE01Gene08259	1.88558	0.915009	7.96245e-05	0.000509167	yes	up	_
LE01Gene04083	0.645659	-0.631157	8.03204e-05	0.000513328	yes	down	_
LE01Gene07774	1.87206	0.904626	8.06216e-05	0.000514964	yes	up	RecName: Full=tRNA (uracil-O(2)-)-methyltransferase
LE01Gene09663	1.75712	0.813216	8.10256e-05	0.000517254	yes	up	RecName: Full=2-oxoisovalerate dehydrogenase subunit alpha, mitochondrial; AltName: Full=Branched-chain alpha-keto acid dehydrogenase E1 component alpha chain; Shor
LE01Gene09724	0.413666	-1.27346	8.134e-05	0.00051897	yes	down	_
[truncated: 1,814 more rows]

## Sheet: KvsK3
Gene_id	FC(K3/K)	Log2FC(K3/K)	Pvalue	Padjust	Significant	Regulate	Gene description
[truncated: 5,990 more rows]

## Sheet: K1vsK2
Gene_id	FC(K2/K1)	Log2FC(K2/K1)	Pvalue	Padjust	Significant	Regulate	Gene description
[truncated: 1,083 more rows]

[truncated: 2 more sheets: K1vsK3, K2vsK3]
